# Supplementary material for: An Immune-Inflammation Gene Expression Signature in Prostate Tumors of Smokers
Source: Oxford University Press journal article supplement (doi:10.1158/0008-5472.can-14-3630), 2016-01-11
Supplement: 00085472can143630-sup-142283_2_supp_3175898_nv99bq.xls [file 00085472can143630-sup-142283_2_supp_3175898_nv99bq.xls]

## Sheet: sheet 1
Supplementary Table 9: Genes differently expressed between nicotine-treated and untreated 22Rv1 cells
SAM-based analysis; FDR (q-value) < 20%
GenBankID	Gene Symbol	Gene ID	Fold Change	q-value(%)	Ttest_P_Val	Gene Title
NM_003753	EIF3S7	200005_at	1.202418746	0	0.000971848	"eukaryotic translation initiation factor 3, subunit 7 zeta, 66/67kDa /// eukaryotic translation initiation factor 3, subunit 7 zeta, 66/67kDa"
NM_005345	HSPA1A /// HSPA1B	200800_s_at	1.237892192	0	0.000203155	heat shock 70kDa protein 1A /// heat shock 70kDa protein 1B
NM_012215	MGEA5	200899_s_at	1.211021744	0	0.000406402	meningioma expressed antigen 5 (hyaluronidase)
BC000704	TSPAN3	200972_at	1.204884047	0	0.000694659	tetraspanin 3
NM_002266	KPNA2	201088_at	0.799000501	0	0.000130598	"karyopherin alpha 2 (RAG cohort 1, importin alpha 1)"
AW055008	NPEPPS	201454_s_at	1.20234381	0	0.000388424	aminopeptidase puromycin sensitive
AJ132583	NPEPPS	201455_s_at	1.226564852	0	0.000613638	aminopeptidase puromycin sensitive
AI039874	NQO1	201467_s_at	0.648287238	0	4.53492e-05	"NAD(P)H dehydrogenase, quinone 1"
NM_002835	PTPN12	202006_at	1.336358649	0	0.000224911	"protein tyrosine phosphatase, non-receptor type 12"
NM_005165	ALDOC	202022_at	1.430392739	0	4.63965e-05	"aldolase C, fructose-bisphosphate"
AI861942	LDLR	202067_s_at	1.405703887	0	0.00163725	low density lipoprotein receptor (familial hypercholesterolemia)
NM_000527	LDLR	202068_s_at	1.378122132	0	1.51511e-05	low density lipoprotein receptor (familial hypercholesterolemia)
NM_005629	SLC6A8	202219_at	1.271714772	0	0.000134007	"solute carrier family 6 (neurotransmitter transporter, creatine), member 8"
NM_003165	STXBP1	202260_s_at	1.445040274	0	7.37533e-05	syntaxin binding protein 1
NM_000919	PAM	202336_s_at	1.409451047	0	6.25934e-05	peptidylglycine alpha-amidating monooxygenase
NM_002773	PRSS8	202525_at	1.424747766	0	2.55616e-05	"protease, serine, 8 (prostasin)"
AV681579	APPBP2	202629_at	1.223685126	0	0.000943476	amyloid beta precursor protein (cytoplasmic tail) binding protein 2
NM_006010	ARMET	202655_at	0.778681371	0	0.00213842	"arginine-rich, mutated in early stage tumors"
NM_020990	CKMT1B /// CKMT1A	202712_s_at	0.793808715	0	0.00053557	"creatine kinase, mitochondrial 1B /// creatine kinase, mitochondrial 1A"
NM_014883	FAM13A1	202973_x_at	1.297984852	0	0.000369807	"family with sequence similarity 13, member A1"
NM_013450	BAZ2B	203080_s_at	1.375453905	0	0.000136582	"bromodomain adjacent to zinc finger domain, 2B"
NM_006396	SSSCA1	203114_at	0.755826163	0	0.000615884	Sjogren's syndrome/scleroderma autoantigen 1
AW235612	ATXN1	203231_s_at	1.622620333	0	0.000176706	ataxin 1
NM_004699	FAM50A	203262_s_at	1.243517093	0	0.000523091	"family with sequence similarity 50, member A"
NM_003916	AP1S2	203300_x_at	1.421802482	0	0.00217345	"adaptor-related protein complex 1, sigma 2 subunit"
AB020631	PCF11	203378_at	1.411397636	0	0.000162324	"PCF11, cleavage and polyadenylation factor subunit, homolog (S. cerevisiae)"
NM_001237	CCNA2	203418_at	0.73564042	0	7.73151e-05	cyclin A2
NM_015396	ARMC8	203487_s_at	1.349232561	0	0.000178387	armadillo repeat containing 8
NM_006829	C10orf116	203571_s_at	0.690028208	0	0.000231088	chromosome 10 open reading frame 116
NM_005741	ZNF263	203707_at	1.261500388	0	7.02831e-05	zinc finger protein 263
NM_002949	MRPL12	203931_s_at	0.658383771	0	0.00108828	mitochondrial ribosomal protein L12
NM_002598	PDCD2	204025_s_at	1.316378687	0	1.30761e-05	programmed cell death 2
NM_001239	CCNH	204093_at	0.788430503	0	7.27309e-05	cyclin H
NM_001455	FOXO3A	204132_s_at	1.279386544	0	0.000401857	forkhead box O3A
NM_006716	ASK	204244_s_at	0.831606549	0	0.000225228	activator of S phase kinase
NM_002497	NEK2	204641_at	0.774662567	0	0.000301904	NIMA (never in mitosis gene a)-related kinase 2
NM_001714	BICD1	204741_at	1.512419214	0	0.000328283	bicaudal D homolog 1 (Drosophila)
NM_013296	GPSM2	205240_at	0.818830101	0	2.21346e-05	"G-protein signalling modulator 2 (AGS3-like, C. elegans)"
NM_017425	SPA17	205406_s_at	0.821699063	0	0.00010015	sperm autoantigenic protein 17
NM_002589	PCDH7	205534_at	0.494345094	0	0.000603399	BH-protocadherin (brain-heart)
NM_002589	PCDH7	205535_s_at	0.502250681	0	4.21048e-06	BH-protocadherin (brain-heart)
NM_006343	MERTK	206028_s_at	1.665475957	0	0.00098311	c-mer proto-oncogene tyrosine kinase
NM_001492	GDF1 /// LASS1	206397_x_at	1.304104317	0	0.000167331	growth differentiation factor 1 /// LAG1 longevity assurance homolog 1 (S. cerevisiae)
NM_003234	TFRC	207332_s_at	1.243481913	0	0.00089853	"transferrin receptor (p90, CD71)"
NM_003662	PIR	207469_s_at	0.829696469	0	0.00117064	pirin (iron-binding nuclear protein)
NM_006462	C20orf18	207713_s_at	1.408315345	0	1.4461e-05	chromosome 20 open reading frame 18
M31523	TCF3	209153_s_at	1.50430542	0	2.35581e-08	transcription factor 3 (E2A immunoglobulin enhancer binding factors E12/E47)
U72514	C2F	209233_at	0.709518384	0	0.000140517	C2f protein
AB000462	SH3BP2	209371_s_at	1.331601033	0	0.000466673	SH3-domain binding protein 2
AF013168	TSC1	209390_at	1.315564022	0	0.000259924	tuberous sclerosis 1
AF151867	TMED7	209404_s_at	0.688772098	0	1.54762e-05	transmembrane emp24 protein transport domain containing 7
AB007871	SRGAP3	209794_at	1.566222256	0	0.000488808	SLIT-ROBO Rho GTPase activating protein 3
BC002906	UCK2	209825_s_at	0.79025181	0	0.000274026	uridine-cytidine kinase 2
U52144	IDH2	210046_s_at	0.756363244	0	2.3431e-05	"isocitrate dehydrogenase 2 (NADP+), mitochondrial"
AF212224	CLK4	210346_s_at	1.343794828	0	1.87457e-05	CDC-like kinase 4
BC000906	NQO1	210519_s_at	0.670192421	0	0.00082747	"NAD(P)H dehydrogenase, quinone 1"
U41815	NUP98	210793_s_at	0.731573144	0	5.47043e-05	nucleoporin 98kDa
BC006344	PDIA4	211048_s_at	0.758371176	0	0.000684332	"protein disulfide isomerase family A, member 4 /// protein disulfide isomerase family A, member 4"
M32577	HLA-DQB1	211656_x_at	0.610278202	0	0.000475699	"major histocompatibility complex, class II, DQ beta 1 /// major histocompatibility complex, class II, DQ beta 1"
AF216292	HSPA5	211936_at	0.760945125	0	0.000474416	"heat shock 70kDa protein 5 (glucose-regulated protein, 78kDa)"
AK000826	RAB7	211961_s_at	1.206281658	0	0.000349534	"RAB7, member RAS oncogene family"
AB046844	GPR107	211979_at	1.239193091	0	0.000223128	G protein-coupled receptor 107
Z93241	POLDIP3	212100_s_at	1.222524791	0	7.55066e-05	"polymerase (DNA-directed), delta interacting protein 3"
AA813260	LPIN1	212272_at	1.372460138	0	0.00129867	lipin 1
AV705559	LPIN1	212274_at	1.416486579	0	0.000572267	lipin 1
D80010	LPIN1	212276_at	1.408508575	0	0.0028124	lipin 1
AW572909	ANKRD12	212286_at	1.303744611	0	0.00025821	ankyrin repeat domain 12
W85912	NUDT3	212608_s_at	1.464925879	0	0.00169789	Nudix (nucleoside diphosphate linked moiety X)-type motif 3
AL520774	MDH2	213333_at	1.340482322	0	0.00182163	"malate dehydrogenase 2, NAD (mitochondrial)"
N95443	RAB22A	213405_at	1.269825251	0	3.78363e-05	"RAB22A, member RAS oncogene family"
AK024034	PIK4CA /// LOC220686	213408_s_at	1.35377022	0	3.26527e-06	"phosphatidylinositol 4-kinase, catalytic, alpha polypeptide /// hypothetical protein LOC220686"
AA995925	NFASC	213438_at	1.526176715	0	0.000440159	neurofascin
AB011115	KIAA0543	213444_at	1.277453438	0	0.000152979	likely ortholog of mouse SCO-spondin
AL031228	HSD17B8	213540_at	0.641186784	0	0.000206633	hydroxysteroid (17-beta) dehydrogenase 8
BF446180	PDCD2	213581_at	0.811405912	0	0.000218793	programmed cell death 2
AI620911	LOC283768 /// LOC388080 /// LOC388189 /// LOC390535 /// LOC400304 /// LOC440234 /// DKFZp434P162	213737_x_at	1.376495739	0	0.000242618	"hypothetical LOC283768 /// similar to hypothetical protein /// similar to hypothetical protein /// golgi autoantigen, golgin family member /// similar to hypothetical protein /// similar to hypothetical protein /// hypothetical protein DKFZp434P162"
AV753204	MAP3K9	213927_at	1.277175387	0	0.000267549	mitogen-activated protein kinase kinase kinase 9
AW195837	NPFF	214184_at	1.683284054	0	0.000194848	neuropeptide FF-amide peptide precursor
AW274747	CTAGE4 /// LOC441296 /// LOC442780	214355_x_at	1.257078972	0	0.000726344	"CTAGE family, member 4 /// similar to FLJ00261 protein /// hypothetical protein LOC442780"
N58120	---	214415_at	1.885937752	0	4.73169e-06	"CDNA FLJ43430 fis, clone OCBBF2027661"
NM_003175	XCL1 /// XCL2	214567_s_at	1.516448488	0	0.000343591	chemokine (C motif) ligand 1 /// chemokine (C motif) ligand 2
AW190873	ROD1	214697_s_at	0.813755877	0	0.000346339	ROD1 regulator of differentiation 1 (S. pombe)
AW516297	NOTCH2NL	214722_at	1.402197639	0	0.00106914	Notch homolog 2 (Drosophila) N-terminal like
AW084068	PFAAP5	214753_at	1.546504169	0	0.000188157	Hypothetical gene CG012
NM_016061	YPEL5	217783_s_at	1.213934016	0	0.000576082	yippee-like 5 (Drosophila)
NM_016312	WBP11	217822_at	0.829730288	0	0.000820114	WW domain binding protein 11
AF182415	RBM8A	217856_at	1.238260278	0	0.000541949	RNA binding motif protein 8A
NM_021941	PDXK	218019_s_at	1.200232834	0	0.00184843	"pyridoxal (pyridoxine, vitamin B6) kinase"
NM_017802	FLJ20397	218460_at	1.20776963	0	0.00105525	hypothetical protein FLJ20397
NM_025232	C8orf20	218777_at	0.758961739	0	0.0010282	chromosome 8 open reading frame 20
AF298153	BRF2	218954_s_at	1.446952486	0	0.000132428	"BRF2, subunit of RNA polymerase III transcription initiation factor, BRF1-like"
NM_024945	C9orf76	218979_at	0.816640558	0	0.000839928	chromosome 9 open reading frame 76
NM_022460	HS1BP3	219020_at	1.433145023	0	0.00106676	HS1-binding protein 3
NM_006901	MYO9A	219027_s_at	1.476518953	0	0.00155072	myosin IXA
NM_016594	FKBP11	219117_s_at	1.475562122	0	0.000594168	"FK506 binding protein 11, 19 kDa"
NM_014519	ZNF232	219123_at	1.242723571	0	6.11553e-05	zinc finger protein 232
NM_017858	FLJ20516	219258_at	0.775789379	0	0.000115038	timeless-interacting protein
NM_024567	FLJ21616	219269_at	1.245525619	0	0.000996479	hypothetical protein FLJ21616
NM_024808	FLJ22624	219544_at	0.808171125	0	6.16229e-05	FLJ22624 protein
NM_024581	C6orf60	220150_s_at	1.370864418	0	6.66977e-05	chromosome 6 open reading frame 60
NM_018118	MCM3APAS	220459_at	1.392531881	0	0.000305728	MCM3 minichromosome maintenance deficient 3 (S. cerevisiae) associated protein antisense
NM_025190	KIAA1641	220940_at	1.580834867	0	0.000465182	KIAA1641
NM_030763	NSBP1	221238_at	0.678776362	0	2.40755e-05	nucleosomal binding protein 1 /// nucleosomal binding protein 1
NM_031280	MRPS15	221437_s_at	0.798968294	0	0.00041358	mitochondrial ribosomal protein S15 /// mitochondrial ribosomal protein S15
AL138717	RRAGD	221523_s_at	1.297269617	0	0.00030986	Ras-related GTP binding D
AF272036	RRAGD	221524_s_at	1.346680572	0	5.48801e-05	Ras-related GTP binding D
BF792631	CDC14B	221556_at	1.510236088	0	0.000297165	CDC14 cell division cycle 14 homolog B (S. cerevisiae)
BC001193	HIST3H2A	221582_at	1.475276269	0	0.00263849	"histone 3, H2a"
BE250348	RPL22	221726_at	1.210663166	0	0.00045503	ribosomal protein L22
AI655698	CLPB	221845_s_at	0.736838109	0	0.000166791	ClpB caseinolytic peptidase B homolog (E. coli)
AI992187	NACA /// NACAP1	222018_at	1.392529686	0	0.000708217	nascent-polypeptide-associated complex alpha polypeptide /// nascent-polypeptide-associated complex alpha polypeptide pseudogene 1
BC003654	SLC27A3	222217_s_at	0.801177092	0	0.000266193	"solute carrier family 27 (fatty acid transporter), member 3"
AW971248	BAIAP1	222372_at	1.605605902	0	0.000184764	"Membrane associated guanylate kinase, WW and PDZ domain containing 1"
M99436	TLE2	40837_at	1.349276758	0	0.00117437	"transducin-like enhancer of split 2 (E(sp1) homolog, Drosophila)"
AI871396	ZNF500	41113_at	1.338616273	0	2.87699e-05	zinc finger protein 500
AI949392	SEMA4C	46665_at	1.279254138	0	5.5922e-05	"sema domain, immunoglobulin domain (Ig), transmembrane domain (TM) and short cytoplasmic domain, (semaphorin) 4C"
BG537255	DNAJB1	200664_s_at	1.291745142	0.347687101	0.00252143	"DnaJ (Hsp40) homolog, subfamily B, member 1"
AL048503	DUSP3	201536_at	1.447496183	0.347687101	0.00187691	dual specificity phosphatase 3 (vaccinia virus phosphatase VH1-related)
BC002682	DUSP3	201537_s_at	1.329569277	0.347687101	0.0011731	dual specificity phosphatase 3 (vaccinia virus phosphatase VH1-related)
NM_005471	GNPDA1	202382_s_at	1.305148987	0.347687101	0.00115423	glucosamine-6-phosphate deaminase 1
NM_003793	CTSF	203657_s_at	1.318322259	0.347687101	0.00498412	cathepsin F
NM_014719	KIAA0738	204403_x_at	1.220521277	0.347687101	0.000927927	KIAA0738 gene product
NM_003260	TLE2	204431_at	1.279304807	0.347687101	0.000810133	"transducin-like enhancer of split 2 (E(sp1) homolog, Drosophila)"
NM_000735	CGA	204637_at	1.463965966	0.347687101	0.00139827	"glycoprotein hormones, alpha polypeptide"
AW466889	SLC13A3	205243_at	1.459409688	0.347687101	0.000938028	"solute carrier family 13 (sodium-dependent dicarboxylate transporter), member 3"
BG034972	MC1R	205458_at	1.46787753	0.347687101	0.000452505	melanocortin 1 receptor (alpha melanocyte stimulating hormone receptor)
NM_003430	ZNF91	206059_at	1.298531043	0.347687101	0.00125055	"zinc finger protein 91 (HPF7, HTF10)"
NM_004459	FALZ	207186_s_at	1.221653891	0.347687101	0.0035297	fetal Alzheimer antigen
AF267856	C1orf63	209007_s_at	1.401751485	0.347687101	0.00153108	chromosome 1 open reading frame 63
AF237813	ABAT	209459_s_at	1.577214724	0.347687101	0.000746867	4-aminobutyrate aminotransferase
AW070431	MBP	210136_at	1.245008775	0.347687101	0.000500215	myelin basic protein
NM_001417	EIF4B	211937_at	1.220288209	0.347687101	0.00110404	eukaryotic translation initiation factor 4B
AB028990	EXOC7	212034_s_at	1.239619109	0.347687101	0.00122877	exocyst complex component 7
AL096842	MTUS1	212096_s_at	1.204544626	0.347687101	0.00113077	mitochondrial tumor suppressor 1
AB002321	KIAA0323	212356_at	1.490787642	0.347687101	0.00119389	KIAA0323
AB028976	SAMD4	212845_at	1.412834903	0.347687101	0.000836553	sterile alpha motif domain containing 4
AI337901	GATAD1	213018_at	1.312846153	0.347687101	0.00148702	GATA zinc finger domain containing 1
AK025866	RPL28	213223_at	1.491254425	0.347687101	0.00591779	ribosomal protein L28
H15535	PDE4DIP	213388_at	1.38904452	0.347687101	0.00418153	phosphodiesterase 4D interacting protein (myomegalin)
AI307760	COPB2	213500_at	1.210459506	0.347687101	0.00187019	"Coatomer protein complex, subunit beta 2 (beta prime)"
AB011131	PCLO	213558_at	1.30951447	0.347687101	0.000931981	piccolo (presynaptic cytomatrix protein)
N21364	---	214202_at	1.242756857	0.347687101	0.00095001	"MRNA from chromosome 5q21-22, clone:357Ex"
AK025663	ZNF291	216399_s_at	1.378853128	0.347687101	0.000726678	zinc finger protein 291
AL047879	---	217610_at	1.353267598	0.347687101	0.00107608	"CDNA FLJ38765 fis, clone KIDNE2014489"
BC003086	ILF3	217804_s_at	1.295019163	0.347687101	0.00289176	"interleukin enhancer binding factor 3, 90kDa"
NM_017664	ANKRD10	218093_s_at	1.467308653	0.347687101	0.00104316	ankyrin repeat domain 10
NM_016291	IHPK2	218192_at	1.275949063	0.347687101	0.00285943	inositol hexaphosphate kinase 2
NM_018282	PSPC1	218371_s_at	1.249322037	0.347687101	0.000604321	paraspeckle component 1
NM_024047	NUDT9	218375_at	1.27435941	0.347687101	0.00246422	nudix (nucleoside diphosphate linked moiety X)-type motif 9
NM_007171	POMT1	218476_at	1.358862305	0.347687101	0.0011907	protein-O-mannosyltransferase 1
NM_016603	C5orf5	218518_at	1.257209211	0.347687101	0.000644606	chromosome 5 open reading frame 5
BG338251	RAB7L1	218699_at	1.290609256	0.347687101	0.00207612	"RAB7, member RAS oncogene family-like 1"
NM_017836	SLC41A3	219175_s_at	1.411018805	0.347687101	0.00118637	"solute carrier family 41, member 3"
NM_024111	MGC4504	219270_at	1.692234306	0.347687101	0.000895839	hypothetical protein MGC4504
NM_017996	DET1	219641_at	1.266887361	0.347687101	0.0012585	de-etiolated homolog 1 (Arabidopsis)
NM_017865	ZNF692	220661_s_at	1.527432332	0.347687101	0.000963201	zinc finger protein 692
NM_005832	KCNMB2	221097_s_at	1.547117028	0.347687101	0.00282102	"potassium large conductance calcium-activated channel, subfamily M, beta member 2"
NM_012236	SCMH1	221216_s_at	1.23298412	0.347687101	0.000779622	sex comb on midleg homolog 1 (Drosophila)
AV705803	SFPQ	221768_at	1.340768902	0.347687101	0.00108335	Splicing factor proline/glutamine-rich (polypyrimidine tract binding protein associated)
AI983904	---	221973_at	1.578841572	0.347687101	0.000605038	Full-length cDNA clone CS0DM011YC22 of Fetal liver of Homo sapiens (human)
AB002344	JMJD3	41386_i_at	1.39478657	0.347687101	0.0028638	jumonji domain containing 3
AL041852	RANBP10	53987_at	1.289016317	0.347687101	0.00133927	RAN binding protein 10
AI582238	TRA1	200598_s_at	0.832983224	0.479655928	0.00261695	tumor rejection antigen (gp96) 1
AV685208	CALM3	200622_x_at	0.683909487	0.479655928	0.00245898	"calmodulin 3 (phosphorylase kinase, delta)"
NM_000581	GPX1	200736_s_at	0.831019694	0.479655928	0.00448249	glutathione peroxidase 1
BC001425	PSRC1	201896_s_at	0.79519726	0.479655928	0.000443936	proline/serine-rich coiled-coil 1
NM_014669	NUP93	202188_at	0.805962177	0.479655928	0.000501746	nucleoporin 93kDa
NM_003920	TIMELESS	203046_s_at	0.800535836	0.479655928	0.00124002	timeless homolog (Drosophila)
NM_003686	EXO1	204603_at	0.775065726	0.479655928	0.00150364	exonuclease 1
NM_022914	ACD	204617_s_at	0.82686218	0.479655928	0.00114211	adrenocortical dysplasia homolog (mouse)
NM_007080	LSM6	205036_at	0.810122038	0.479655928	0.000471253	"LSM6 homolog, U6 small nuclear RNA associated (S. cerevisiae)"
NM_014291	GCAT	205164_at	0.747540311	0.479655928	0.00504709	glycine C-acetyltransferase (2-amino-3-ketobutyrate coenzyme A ligase)
NM_005025	SERPINI1	205352_at	0.704840307	0.479655928	0.000517841	"serpin peptidase inhibitor, clade I (neuroserpin), member 1"
NM_000156	GAMT	205354_at	0.694311919	0.479655928	0.000724262	guanidinoacetate N-methyltransferase
NM_005905	SMAD9	206320_s_at	0.65011127	0.479655928	0.000102169	"SMAD, mothers against DPP homolog 9 (Drosophila)"
NM_003562	SLC25A11	207088_s_at	0.801172342	0.479655928	0.000525701	"solute carrier family 25 (mitochondrial carrier; oxoglutarate carrier), member 11"
NM_001750	CAST	207467_x_at	0.792244545	0.479655928	0.000945429	calpastatin
M25915	CLU	208792_s_at	0.790847614	0.479655928	0.00178613	"clusterin (complement lysis inhibitor, SP-40,40, sulfated glycoprotein 2, testosterone-repressed prostate message 2, apolipoprotein J)"
M17955	HLA-DQB1	209823_x_at	0.620067111	0.479655928	0.00138795	"major histocompatibility complex, class II, DQ beta 1"
AF342816	LGALS8	210732_s_at	0.666593253	0.479655928	0.000603506	"lectin, galactoside-binding, soluble, 8 (galectin 8)"
Z25425	NEK2	211080_s_at	0.728629154	0.479655928	0.000518776	NIMA (never in mitosis gene a)-related kinase 2 /// NIMA (never in mitosis gene a)-related kinase 2
AK026584	LMNA	212086_x_at	0.746870719	0.479655928	0.000743918	lamin A/C
AI346350	CCNA2	213226_at	0.783408748	0.479655928	0.000906951	Cyclin A2
BE045993	OIP5	213599_at	0.772429614	0.479655928	0.00160667	Opa interacting protein 5
BE407516	CCNB1	214710_s_at	0.741084959	0.479655928	0.000529096	cyclin B1
NM_016129	COPS4	218042_at	0.81037226	0.479655928	0.00117378	COP9 constitutive photomorphogenic homolog subunit 4 (Arabidopsis)
NM_022754	SFXN1	218392_x_at	0.807270587	0.479655928	0.000789454	sideroflexin 1
NM_020365	EIF2B3	218488_at	0.690145309	0.479655928	0.00192792	"eukaryotic translation initiation factor 2B, subunit 3 gamma, 58kDa"
NM_022044	SDF2L1	218681_s_at	0.707108384	0.479655928	0.00112927	stromal cell-derived factor 2-like 1
NM_016625	RSRC1	219507_at	0.832041173	0.479655928	0.00103983	arginine/serine-rich coiled-coil 1
NM_018455	BM039	219555_s_at	0.800366587	0.479655928	0.000971415	uncharacterized bone marrow protein BM039
NM_015982	YBX2	219704_at	0.607528653	0.479655928	0.00107164	Y box binding protein 2
NM_022154	SLC39A8	219869_s_at	0.77745371	0.479655928	0.000543536	"solute carrier family 39 (zinc transporter), member 8"
NM_020119	ZC3HAV1	220104_at	0.595756409	0.479655928	0.000391943	"zinc finger CCCH-type, antiviral 1"
NM_017971	MRPL20	220526_s_at	0.784333681	0.479655928	0.00325556	mitochondrial ribosomal protein L20
NM_014170	HSPC135	221046_s_at	0.771596826	0.479655928	0.000573201	HSPC135 protein
NM_025150	TARSL1	221189_s_at	0.822938058	0.479655928	0.00170944	threonyl-tRNA synthetase-like 1
BF939522	PDK3	221957_at	0.619551161	0.479655928	0.0010611	"Pyruvate dehydrogenase kinase, isoenzyme 3"
AA669799	ASMTL	36553_at	0.752443764	0.479655928	0.00136649	acetylserotonin O-methyltransferase-like
W46406	MICAL-L1	55081_at	0.753272099	0.479655928	0.000610294	MICAL-like 1
BE513151	SREBF2	201247_at	1.240845005	0.608452427	0.0023332	sterol regulatory element binding transcription factor 2
U23946	RBM5	201394_s_at	1.217786109	0.608452427	0.00282681	RNA binding motif protein 5
NM_003407	ZFP36	201531_at	1.265096744	0.608452427	0.00102284	"zinc finger protein 36, C3H type, homolog (mouse)"
NM_005397	PODXL	201578_at	1.38939309	0.608452427	0.00144649	podocalyxin-like
NM_004423	DVL3	201908_at	1.33050521	0.608452427	0.00273149	"dishevelled, dsh homolog 3 (Drosophila)"
NM_006736	DNAJB2	202500_at	1.316693095	0.608452427	0.00112567	"DnaJ (Hsp40) homolog, subfamily B, member 2"
AF070613	TNKS	202561_at	1.234328993	0.608452427	0.00298632	"tankyrase, TRF1-interacting ankyrin-related ADP-ribose polymerase"
NM_003318	TTK	204822_at	0.830360706	0.608452427	0.00144472	TTK protein kinase
NM_005225	E2F1	204947_at	0.698628815	0.608452427	0.00170787	E2F transcription factor 1
NM_004420	DUSP8	206374_at	1.456215448	0.608452427	0.00528014	dual specificity phosphatase 8
NM_005309	GPT	206709_x_at	0.672465027	0.608452427	0.00216716	glutamic-pyruvate transaminase (alanine aminotransferase)
NM_012243	SLC35A3	206770_s_at	0.721820575	0.608452427	0.00311096	"solute carrier family 35 (UDP-N-acetylglucosamine (UDP-GlcNAc) transporter), member A3"
AF247168	C1orf63	209006_s_at	1.488195394	0.608452427	0.00525643	chromosome 1 open reading frame 63
AF106069	USP15	209475_at	1.297145247	0.608452427	0.00174382	ubiquitin specific peptidase 15
AF056979	IFNGR1	211676_s_at	1.207256009	0.608452427	0.00200387	interferon gamma receptor 1 /// interferon gamma receptor 1
AA628586	PPAP2B	212226_s_at	1.317324561	0.608452427	0.00341927	phosphatidic acid phosphatase type 2B
BE379006	CD59	212463_at	1.209204493	0.608452427	0.00361549	"CD59 antigen p18-20 (antigen identified by monoclonal antibodies 16.3A5, EJ16, EJ30, EL32 and G344)"
AF055006	SEC6L1	212630_at	1.345482625	0.608452427	0.00388267	SEC6-like 1 (S. cerevisiae)
BF511231	TFPI	213258_at	1.339325167	0.608452427	0.00472375	Tissue factor pathway inhibitor (lipoprotein-associated coagulation inhibitor)
W95043	LOC150759	213703_at	1.776971201	0.608452427	0.00259939	hypothetical protein LOC150759
BE348997	RPS9	214317_x_at	1.20029126	0.608452427	0.00351695	Ribosomal protein S9
AF090883	FLCN	215645_at	2.323525376	0.608452427	0.00289382	Folliculin
AK025862	TRA1	216449_x_at	0.779829207	0.608452427	0.00269865	tumor rejection antigen (gp96) 1
AK027138	FAM13A1	217047_s_at	1.22664915	0.608452427	0.00152618	"family with sequence similarity 13, member A1"
S70123	LDLR	217173_s_at	1.401755576	0.608452427	0.00394665	low density lipoprotein receptor (familial hypercholesterolemia)
NM_025140	FLJ22471	218175_at	1.318838536	0.608452427	0.00221288	limkain beta 2
NM_018178	GOLPH3L	218361_at	1.208474842	0.608452427	0.00229191	golgi phosphoprotein 3-like
NM_016588	NRN1	218625_at	1.357345322	0.608452427	0.00686794	neuritin 1
AW575493	NS3TP2	218706_s_at	1.252599311	0.608452427	0.00125	HCV NS3-transactivated protein 2
NM_014026	DCPS	218774_at	0.802340867	0.608452427	0.00109827	"decapping enzyme, scavenger"
NM_015960	CUTC	218970_s_at	0.798306344	0.608452427	0.00126277	cutC copper transporter homolog (E.coli)
NM_018944	C21orf45	219004_s_at	0.725891519	0.608452427	0.00214597	chromosome 21 open reading frame 45
NM_016354	SLCO4A1	219911_s_at	1.368983621	0.608452427	0.00285752	"solute carrier organic anion transporter family, member 4A1"
NM_021633	KLHL12	219931_s_at	1.209462981	0.608452427	0.00419966	kelch-like 12 (Drosophila)
NM_007082	RABL2B /// RABL2A	220500_s_at	0.799024585	0.608452427	0.00111129	"RAB, member of RAS oncogene family-like 2B /// RAB, member of RAS oncogene family-like 2A"
NM_006550	FSBP /// RAD54B	220549_at	0.581313415	0.608452427	0.000295677	fibrinogen silencer binding protein /// RAD54 homolog B (S. cerevisiae)
NM_015678	NBEA	221207_s_at	1.410120196	0.608452427	0.00185904	neurobeachin
NM_030802	LOC81558	221249_s_at	1.356175819	0.608452427	0.00208098	C/EBP-induced protein /// C/EBP-induced protein
NM_030809	C12orf22	221260_s_at	1.28455706	0.608452427	0.00220141	chromosome 12 open reading frame 22 /// chromosome 12 open reading frame 22
AL044078	---	221860_at	1.287879209	0.608452427	0.00215448	---
BG235929	DPH1 /// OVCA2	222041_at	0.766092399	0.608452427	0.00077981	DPH1 homolog (S. cerevisiae) /// candidate tumor suppressor in ovarian cancer 2
AF053356	LRCH4	37796_at	1.482820156	0.608452427	0.00290578	leucine-rich repeats and calponin homology (CH) domain containing 4
AW016304	DVL2	57532_at	1.209671987	0.608452427	0.00287153	"dishevelled, dsh homolog 2 (Drosophila)"
AI348010	RPL31	200962_at	1.45920338	0.724774215	0.00262117	ribosomal protein L31
BF338509	PIP5K2B	201080_at	1.2713259	0.724774215	0.00257084	"Phosphatidylinositol-4-phosphate 5-kinase, type II, beta"
NM_000876	IGF2R	201393_s_at	1.223630421	0.724774215	0.00275348	insulin-like growth factor 2 receptor
NM_003900	SQSTM1	201471_s_at	1.219905808	0.724774215	0.00520166	sequestosome 1
AU144284	IRF6	202597_at	1.245555079	0.724774215	0.0035934	interferon regulatory factor 6
NM_014345	ZNF318	203521_s_at	1.212899886	0.724774215	0.00279299	zinc finger protein 318
AI363270	TRIM38	203610_s_at	1.324672518	0.724774215	0.00451526	tripartite motif-containing 38
NM_005013	NUCB2	203675_at	0.807883135	0.724774215	0.00160976	nucleobindin 2
AI762296	JUND	203751_x_at	1.298829783	0.724774215	0.00641837	jun D proto-oncogene
NM_004337	C8orf1	204024_at	1.265951445	0.724774215	0.000375909	chromosome 8 open reading frame 1
NM_014636	RALGPS1	204199_at	1.32698016	0.724774215	0.00227298	Ral GEF with PH domain and SH3 binding motif 1
NM_014705	DOCK4	205003_at	1.389019283	0.724774215	0.0027221	dedicator of cytokinesis 4
NM_000946	PRIM1	205053_at	0.784091692	0.724774215	0.00172009	"primase, polypeptide 1, 49kDa"
NM_005389	PCMT1	205202_at	0.827185094	0.724774215	0.00216929	protein-L-isoaspartate (D-aspartate) O-methyltransferase
NM_001415	EIF2S3	205321_at	1.207119609	0.724774215	0.00324132	"eukaryotic translation initiation factor 2, subunit 3 gamma, 52kDa"
NM_016188	ACTL6B	206013_s_at	1.463224526	0.724774215	0.0021295	actin-like 6B
NM_002570	PCSK6	207414_s_at	1.588173716	0.724774215	0.00177919	proprotein convertase subtilisin/kexin type 6
BC005374	TXNDC4	208959_s_at	0.832083864	0.724774215	0.00214196	thioredoxin domain containing 4 (endoplasmic reticulum)
U94592	UCP2	208998_at	0.635705217	0.724774215	0.00253703	"uncoupling protein 2 (mitochondrial, proton carrier)"
AB040120	SLC39A8	209267_s_at	0.821897292	0.724774215	0.00200252	"solute carrier family 39 (zinc transporter), member 8"
AB014600	SIN3B	209352_s_at	1.417375233	0.724774215	0.00200919	"SIN3 homolog B, transcription regulator (yeast)"
AF043294	BUB1	209642_at	0.762925341	0.724774215	0.00199769	BUB1 budding uninhibited by benzimidazoles 1 homolog (yeast)
AF119814	ZNF291	209741_x_at	1.366041523	0.724774215	0.001906	zinc finger protein 291
AI373854	KIAA0415	209912_s_at	1.403594068	0.724774215	0.00545276	KIAA0415 protein
U62733	CHKB /// CPT1B	210069_at	1.406912986	0.724774215	0.00200423	choline kinase beta /// carnitine palmitoyltransferase 1B (muscle)
AF055078	ZNF42	210336_x_at	1.224290597	0.724774215	0.00402278	zinc finger protein 42 (myeloid-specific retinoic acid-responsive)
BE897886	RHOQ	212120_at	1.393645961	0.724774215	0.00244985	"Ras homolog gene family, member Q"
AI583173	HLA-DQB1	212998_x_at	0.615586537	0.724774215	0.00705336	"major histocompatibility complex, class II, DQ beta 1 /// major histocompatibility complex, class II, DQ beta 1"
BF592982	76P	213266_at	1.285515811	0.724774215	0.0016616	Gamma tubulin ring complex protein (76p gene)
BF339133	PEX10	213296_at	1.254663983	0.724774215	0.00257714	Peroxisome biogenesis factor 10
AA398569	LOC91316	213502_x_at	1.711049871	0.724774215	0.00270817	"similar to bK246H3.1 (immunoglobulin lambda-like polypeptide 1, pre-B-cell specific)"
BF063896	C18orf10	213617_s_at	0.794270184	0.724774215	0.00383008	chromosome 18 open reading frame 10
AI983201	ZFP276	213778_x_at	1.36060263	0.724774215	0.00156386	zinc finger protein 276 homolog (mouse)
AI806207	VGLL4	214004_s_at	1.255319535	0.724774215	0.00502172	vestigial like 4 (Drosophila)
AL558875	SFPQ	214016_s_at	1.263575187	0.724774215	0.00533688	Splicing factor proline/glutamine-rich (polypyrimidine tract binding protein associated)
AI821777	NFASC	214799_at	1.311422291	0.724774215	0.00153424	Neurofascin
AK027246	SC5DL	215064_at	1.466742615	0.724774215	0.00197427	"Sterol-C5-desaturase (ERG3 delta-5-desaturase homolog, fungal)-like"
AL049782	CG012	215318_at	1.686445231	0.724774215	0.00119982	hypothetical gene CG012
AC004883	GTF2IRD2	215569_at	1.938898199	0.724774215	0.0025404	GTF2I repeat domain containing 2
AL121749	FZD8	216587_s_at	1.381685185	0.724774215	0.000827484	frizzled homolog 8 (Drosophila)
AF319523	SNRPN	216850_at	1.881461623	0.724774215	0.00112067	small nuclear ribonucleoprotein polypeptide N
NM_015710	GLTSCR2	217807_s_at	1.227969953	0.724774215	0.00742158	glioma tumor suppressor candidate region gene 2
NM_018171	DIP13B	218218_at	1.310088689	0.724774215	0.00667351	DIP13 beta
NM_017635	SUV420H1	218242_s_at	1.293088118	0.724774215	0.00291649	suppressor of variegation 4-20 homolog 1 (Drosophila)
NM_024077	SECISBP2	218265_at	1.273129847	0.724774215	0.00226719	SECIS binding protein 2
NM_024540	MRPL24	218270_at	0.782873824	0.724774215	0.00205855	mitochondrial ribosomal protein L24
NM_024044	GIYD2 /// GIYD1	218317_x_at	0.684884659	0.724774215	0.00242859	GIY-YIG domain containing 2 /// GIY-YIG domain containing 1
NM_024324	MGC11256	218358_at	0.822359783	0.724774215	0.00289038	hypothetical protein MGC11256
NM_018202	TMEM57	218562_s_at	1.353308444	0.724774215	0.00150345	transmembrane protein 57
NM_017610	RNF111	218761_at	1.234522703	0.724774215	0.00262715	ring finger protein 111
NM_024585	ARMC7	219096_at	1.26970987	0.724774215	0.00120778	armadillo repeat containing 7
NM_014353	RAB26	219562_at	1.314546068	0.724774215	0.00239548	"RAB26, member RAS oncogene family"
NM_017569	FAM48A	220408_x_at	1.569257218	0.724774215	0.00333247	"family with sequence similarity 48, member A"
NM_016183	C1orf33	220688_s_at	0.789147446	0.724774215	0.003201	chromosome 1 open reading frame 33
NM_016947	C6orf48	220755_s_at	1.260522727	0.724774215	0.00591044	chromosome 6 open reading frame 48
NM_030938	TMEM49 /// MIRN21	220990_s_at	0.796487368	0.724774215	0.00323594	transmembrane protein 49 /// transmembrane protein 49 /// microRNA 21 /// microRNA 21
NM_030778	CYFIP2	220999_s_at	1.450801984	0.724774215	0.00139688	cytoplasmic FMR1 interacting protein 2 /// cytoplasmic FMR1 interacting protein 2
BF508835	---	221877_at	1.235784652	0.724774215	0.00457341	"CDNA FLJ46713 fis, clone TRACH3016885"
AW190208	CLCN7	221961_at	1.508846774	0.724774215	0.00152612	Chloride channel 7
AI419423	PAPOLG	222273_at	1.337657848	0.724774215	0.00237814	poly(A) polymerase gamma
AA648521	SFRS15	222311_s_at	1.280151092	0.724774215	0.00151602	"splicing factor, arginine/serine-rich 15"
AA836114	FBXO42	47773_at	1.222818203	0.724774215	0.00164471	F-box protein 42
NM_005724	TSPAN3	200973_s_at	1.224690378	0.885352933	0.00555179	tetraspanin 3
BC001255	NCBP2	201517_at	1.216640534	0.885352933	0.00628414	"nuclear cap binding protein subunit 2, 20kDa"
NM_006253	PRKAB1	201835_s_at	1.347318061	0.885352933	0.00612077	"protein kinase, AMP-activated, beta 1 non-catalytic subunit"
NM_001551	IGBP1	202105_at	1.446482405	0.885352933	0.00450067	immunoglobulin (CD79A) binding protein 1
NM_000396	CTSK	202450_s_at	1.712408687	0.885352933	0.00540891	cathepsin K (pycnodysostosis)
NM_012412	H2AFV	202487_s_at	0.815909482	0.885352933	0.00313585	"H2A histone family, member V"
NM_000416	IFNGR1	202727_s_at	1.218450573	0.885352933	0.003399	interferon gamma receptor 1
AB002386	EZH1	203249_at	1.54194905	0.885352933	0.00322317	enhancer of zeste homolog 1 (Drosophila)
NM_005573	LMNB1	203276_at	0.773213335	0.885352933	0.00334273	lamin B1
NM_014686	KIAA0355	203288_at	1.428348123	0.885352933	0.00722304	KIAA0355
D50692	MYCBP	203360_s_at	0.763070034	0.885352933	0.00343657	c-myc binding protein
NM_021126	MPST	203524_s_at	1.286156778	0.885352933	0.0112622	mercaptopyruvate sulfurtransferase
NM_002915	RFC3	204128_s_at	0.792660669	0.885352933	0.00252818	"replication factor C (activator 1) 3, 38kDa"
NM_003422	ZNF42	204139_x_at	1.259155136	0.885352933	0.00370289	zinc finger protein 42 (myeloid-specific retinoic acid-responsive)
BE966146	RAD51AP1	204146_at	0.722950387	0.885352933	0.00369188	RAD51 associated protein 1
AI991328	CHKA	204233_s_at	1.522652498	0.885352933	0.011412	choline kinase alpha
NM_001277	CHKA	204266_s_at	1.483032267	0.885352933	0.0102146	choline kinase alpha
NM_016436	PHF20	206567_s_at	1.23823305	0.885352933	0.00693093	PHD finger protein 20
NM_021039	S100A11	208540_x_at	0.807345394	0.885352933	0.00274532	S100 calcium binding protein A11 (calgizzarin)
AI829170	GOLGA8A /// GOLGA8B	208797_s_at	1.958152409	0.885352933	0.000929358	"golgi autoantigen, golgin subfamily a, 8A /// golgi autoantigen, golgin subfamily a, 8B"
AF070548	SLC25A11	209003_at	0.766378795	0.885352933	0.00828329	"solute carrier family 25 (mitochondrial carrier; oxoglutarate carrier), member 11"
U29343	HMMR	209709_s_at	0.799998816	0.885352933	0.00311476	hyaluronan-mediated motility receptor (RHAMM)
BC004952	PCGF1	210022_at	1.219612257	0.885352933	0.00527675	polycomb group ring finger 1
AF164622	GOLGA8B	210425_x_at	1.603542223	0.885352933	0.00347819	"golgi autoantigen, golgin subfamily a, 8B"
BC002836	EFCAB2	211200_s_at	0.547092441	0.885352933	0.000308847	EF-hand calcium binding domain 2
AI768512	WNK1	211993_at	1.454342	0.885352933	0.00483407	WNK lysine deficient protein kinase 1 /// WNK lysine deficient protein kinase 1
BG256504	LOC23117 /// DKFZp547E087 /// LOC348162 /// LOC440354 /// LOC613037	211996_s_at	1.263050425	0.885352933	0.00582166	KIAA0220-like protein /// hypothetical gene LOC283846 /// hypothetical protein 348162 /// PI-3-kinase-related kinase SMG-1 pseudogene /// similar to the PI-3-kinase-related kinase SMG-1 family pseudogene 2
D50911	VGLL4	212399_s_at	1.2453034	0.885352933	0.00604534	vestigial like 4 (Drosophila)
AB014593	SS18L1	213140_s_at	1.278456448	0.885352933	0.00409711	synovial sarcoma translocation gene on chromosome 18-like 1
N95363	CDKN1C	213183_s_at	1.630285364	0.885352933	0.00250355	"Cyclin-dependent kinase inhibitor 1C (p57, Kip2)"
AB018324	SNF1LK2	213221_s_at	1.214883304	0.885352933	0.00223787	SNF1-like kinase 2
AL577024	LOC221362	213248_at	0.739505469	0.885352933	0.00256315	hypothetical protein LOC221362
AI890903	KCTD7	213474_at	1.599310299	0.885352933	0.00506563	Potassium channel tetramerisation domain containing 7
AW103422	PCBP2	213517_at	1.286556224	0.885352933	0.00339012	Poly(rC) binding protein 2
AB011537	SLIT1	213601_at	1.425425509	0.885352933	0.00508031	slit homolog 1 (Drosophila)
AI656610	C14orf143	214264_s_at	0.717172288	0.885352933	0.00570003	chromosome 14 open reading frame 143
BG286537	TMED7	214658_at	0.760095979	0.885352933	0.00396572	transmembrane emp24 protein transport domain containing 7
AI204981	IREB2	214666_x_at	0.639788794	0.885352933	0.00211914	iron-responsive element binding protein 2
AB007861	MGC22014	214754_at	1.333493308	0.885352933	0.00230427	hypothetical protein MGC22014
AK021884	LOC440434	215090_x_at	1.213032257	0.885352933	0.00716564	hypothetical protein FLJ11822
X52078	TCF3	215260_s_at	1.269358805	0.885352933	0.00290476	transcription factor 3 (E2A immunoglobulin enhancer binding factors E12/E47)
AB040906	ZNF492	215532_x_at	0.755358582	0.885352933	0.00232853	zinc finger protein 492
BG396614	---	217520_x_at	0.661101966	0.885352933	0.00181926	"Homo sapiens, Similar to hect domain and RLD 2, clone IMAGE:4581928, mRNA"
NM_018368	LMBRD1	218191_s_at	1.268512079	0.885352933	0.00498757	LMBR1 domain containing 1
NM_024589	FLJ22386	218394_at	0.831412785	0.885352933	0.00186961	leucine zipper domain protein
NM_017748	FLJ20291	218655_s_at	1.262847044	0.885352933	0.00245375	hypothetical protein FLJ20291
NM_016400	HYPK	218680_x_at	0.776783344	0.885352933	0.00580918	Huntingtin interacting protein K
NM_024308	MGC4172	218756_s_at	0.719320924	0.885352933	0.00299518	short-chain dehydrogenase/reductase
NM_019021	FLJ20010	218789_s_at	0.81767065	0.885352933	0.00195273	hypothetical protein FLJ20010
NM_017880	FLJ20558	219128_at	1.337206908	0.885352933	0.00267713	hypothetical protein FLJ20558
NM_021163	NT5C	219214_s_at	0.789372916	0.885352933	0.0017982	"5', 3'-nucleotidase, cytosolic"
NM_024610	HSPBAP1	219284_at	1.243474007	0.885352933	0.00342375	HSPB (heat shock 27kDa) associated protein 1
NM_024680	E2F8	219990_at	0.741481648	0.885352933	0.00282092	E2F transcription factor 8
NM_016017	UCHL5	220083_x_at	0.775035671	0.885352933	0.00163317	ubiquitin carboxyl-terminal hydrolase L5
M90360	AKAP13	221718_s_at	1.220103579	0.885352933	0.00390377	A kinase (PRKA) anchor protein 13 /// A kinase (PRKA) anchor protein 13
AA463853	MGC2747	221988_at	1.243500519	0.885352933	0.00925345	Hypothetical protein MGC2747
AI569458	GTF2H3	222104_x_at	1.280330602	0.885352933	0.00324331	"general transcription factor IIH, polypeptide 3, 34kDa"
AK024369	KLHL22	222141_at	1.42260477	0.885352933	0.000910853	kelch-like 22 (Drosophila)
AI744451	---	81811_at	1.288760368	0.885352933	0.00233649	Similar to Microneme antigen
M87338	RFC2	1053_at	0.756517273	1.170458104	0.00488602	"replication factor C (activator 1) 2, 40kDa"
NM_005620	S100A11	200660_at	0.703875951	1.170458104	0.0119186	S100 calcium binding protein A11 (calgizzarin)
NM_005345	HSPA1A	200799_at	1.238962302	1.170458104	0.0063151	heat shock 70kDa protein 1A
NM_001908	CTSB	200839_s_at	0.748979431	1.170458104	0.00274158	cathepsin B
AL561834	TOP2A	201292_at	0.818011007	1.170458104	0.00698343	topoisomerase (DNA) II alpha 170kDa
NM_005895	GOLGA3	202106_at	1.235218698	1.170458104	0.00382683	"golgi autoantigen, golgin subfamily a, 3"
AI093579	ITGAV	202351_at	1.213854095	1.170458104	0.00962239	"integrin, alpha V (vitronectin receptor, alpha polypeptide, antigen CD51)"
NM_014500	HTATSF1	202602_s_at	0.78870114	1.170458104	0.00649296	HIV TAT specific factor 1
NM_004992	MECP2	202617_s_at	1.368270755	1.170458104	0.00357678	methyl CpG binding protein 2 (Rett syndrome)
NM_000234	LIG1	202726_at	0.802731236	1.170458104	0.00377228	"ligase I, DNA, ATP-dependent"
AA130247	PRKACB	202741_at	1.2824899	1.170458104	0.00495845	"protein kinase, cAMP-dependent, catalytic, beta"
NM_004354	CCNG2	202770_s_at	1.436398179	1.170458104	0.0136864	cyclin G2
NM_000137	FAH	202862_at	0.760898222	1.170458104	0.00325862	fumarylacetoacetate hydrolase (fumarylacetoacetase)
AI382146	SOX9	202935_s_at	0.655442587	1.170458104	0.0115715	"SRY (sex determining region Y)-box 9 (campomelic dysplasia, autosomal sex-reversal)"
NM_001960	EEF1D	203113_s_at	1.20032038	1.170458104	0.0121	eukaryotic translation elongation factor 1 delta (guanine nucleotide exchange protein)
NM_003776	MRPL40	203152_at	0.821951922	1.170458104	0.00575573	mitochondrial ribosomal protein L40
NM_005572	LMNA	203411_s_at	0.780099039	1.170458104	0.00465272	lamin A/C
NM_006526	ZNF217	203739_at	1.310112241	1.170458104	0.0118407	zinc finger protein 217
NM_004237	TRIP13	204033_at	0.776932217	1.170458104	0.00761241	thyroid hormone receptor interactor 13
NM_005932	MIPEP	204305_at	0.670767148	1.170458104	0.00728546	mitochondrial intermediate peptidase
NM_014783	ARHGAP11A	204492_at	0.745134909	1.170458104	0.000793665	Rho GTPase activating protein 11A
NM_002319	LRCH4	204692_at	1.392514549	1.170458104	0.00368741	leucine-rich repeats and calponin homology (CH) domain containing 4
NM_021077	NMB	205204_at	0.619265434	1.170458104	0.00662783	neuromedin B
NM_004472	FOXD1	206307_s_at	1.292023786	1.170458104	0.00966199	forkhead box D1
NM_030818	MGC10471	208094_s_at	1.257028883	1.170458104	0.0074438	hypothetical protein MGC10471 /// hypothetical protein MGC10471
M93008	PCMT1	208857_s_at	0.821485076	1.170458104	0.00300546	protein-L-isoaspartate (D-aspartate) O-methyltransferase
BC001765	STAG2	209023_s_at	0.796868539	1.170458104	0.00238955	stromal antigen 2
AF088867	AGR2	209173_at	0.672141501	1.170458104	0.00241305	anterior gradient 2 homolog (Xenopus laevis)
AF104857	CDC42EP3	209287_s_at	1.376432587	1.170458104	0.00165962	CDC42 effector protein (Rho GTPase binding) 3
AF005775	CFLAR	209939_x_at	0.807136173	1.170458104	0.00230066	CASP8 and FADD-like apoptosis regulator
AK023837	THRAP2	212208_at	1.207803388	1.170458104	0.00577712	thyroid hormone receptor associated protein 2
AB002366	KIAA0368	212427_at	1.328253533	1.170458104	0.00434883	KIAA0368
BE965029	MICAL2	212473_s_at	0.690862279	1.170458104	0.00316688	"microtubule associated monoxygenase, calponin and LIM domain containing 2"
BF057059	D15Wsu75e	212527_at	0.815305678	1.170458104	0.00356455	"DNA segment, Chr 15, Wayne State University 75, expressed"
W68158	FAM21B /// FAM21C /// LOC387680 /// LOC439973	212929_s_at	1.495945338	1.170458104	0.0134453	"family with sequence similarity 21, member B /// family with sequence similarity 21, member C /// similar to KIAA0592 protein /// similar to KIAA0592 protein"
AL137520	FBXO9	212991_at	1.247858303	1.170458104	0.00407959	F-box protein 9
AL578583	APITD1	213454_at	0.738936557	1.170458104	0.00352556	"apoptosis-inducing, TAF9-like domain 1"
BG232034	ATP5C1	214132_at	1.404933134	1.170458104	0.0025437	"ATP synthase, H+ transporting, mitochondrial F1 complex, gamma polypeptide 1"
AI762193	SETDB1	214197_s_at	1.261420111	1.170458104	0.00408163	"SET domain, bifurcated 1"
AI613383	---	214394_x_at	1.231617619	1.170458104	0.0079555	---
NM_002566	P2RY11	214546_s_at	1.998264367	1.170458104	0.00389932	"purinergic receptor P2Y, G-protein coupled, 11"
BF669264	PA2G4	214794_at	0.833046168	1.170458104	0.00386743	"proliferation-associated 2G4, 38kDa"
AB051446	KIAA1659	215750_at	1.424247255	1.170458104	0.00200397	KIAA1659 protein
AL049963	SLC39A8	216504_s_at	0.718154177	1.170458104	0.00188496	"Solute carrier family 39 (zinc transporter), member 8"
NM_014399	TM4SF13	217979_at	0.740450678	1.170458104	0.0101794	Tetraspanin 13
NM_025075	NIF3L1BP1	218334_at	0.775312076	1.170458104	0.00497976	Ngg1 interacting factor 3 like 1 binding protein 1
NM_005733	KIF20A	218755_at	0.804864282	1.170458104	0.00307633	kinesin family member 20A
NM_006113	VAV3	218807_at	1.256563645	1.170458104	0.0120419	vav 3 oncogene
NM_017634	KCTD9	218823_s_at	0.824154751	1.170458104	0.00326114	potassium channel tetramerisation domain containing 9
NM_004107	FCGRT	218831_s_at	2.499567306	1.170458104	0.00528701	"Fc fragment of IgG, receptor, transporter, alpha"
NM_022449	RAB17	218931_at	1.215402662	1.170458104	0.00441111	"RAB17, member RAS oncogene family"
NM_016458	C8orf30A	219071_x_at	0.764529683	1.170458104	0.00293192	chromosome 8 open reading frame 30A
NM_014154	ARMC8	219094_at	0.664107377	1.170458104	0.00352059	armadillo repeat containing 8
NM_023933	C16orf24	219709_x_at	0.7947825	1.170458104	0.00205289	chromosome 16 open reading frame 24
AI628360	NPR3	219789_at	0.613792003	1.170458104	0.000453714	natriuretic peptide receptor C/guanylate cyclase C (atrionatriuretic peptide receptor C)
AF115403	ELF5	220625_s_at	0.818467639	1.170458104	0.00280053	E74-like factor 5 (ets domain transcription factor)
NM_018991	DKFZP434A0131	221191_at	1.255920344	1.170458104	0.00386913	DKFZp434A0131 protein
NM_030806	C1orf21	221272_s_at	1.403824922	1.170458104	0.00637382	chromosome 1 open reading frame 21 /// chromosome 1 open reading frame 21
AF267859	ZDHHC11	221646_s_at	1.399216852	1.170458104	0.00497105	"zinc finger, DHHC-type containing 11"
AI971258	SIAH1	221833_at	1.255484636	1.170458104	0.00915069	Seven in absentia homolog 1 (Drosophila)
AI809961	PFAAP5	221899_at	1.306340749	1.170458104	0.00777439	Hypothetical gene CG012
AI199589	C20orf67	222044_at	0.630883752	1.170458104	0.00200749	chromosome 20 open reading frame 67
AV700891	---	222303_at	1.723878711	1.170458104	0.00217489	---
M61715	WARS	200628_s_at	0.794001935	1.339639893	0.0102361	tryptophanyl-tRNA synthetase
NM_006888	CALM1	200655_s_at	0.811238017	1.339639893	0.00664876	"calmodulin 1 (phosphorylase kinase, delta)"
NM_006145	DNAJB1	200666_s_at	1.245177998	1.339639893	0.00716488	"DnaJ (Hsp40) homolog, subfamily B, member 1"
NM_005239	ETS2	201329_s_at	1.270929929	1.339639893	0.00325854	v-ets erythroblastosis virus E26 oncogene homolog 2 (avian)
NM_002887	RARS	201330_at	1.395319835	1.339639893	0.00748245	arginyl-tRNA synthetase
BG031974	IGF2R	201392_s_at	1.33759902	1.339639893	0.00835509	insulin-like growth factor 2 receptor
NM_006618	JARID1B	201549_x_at	1.573087724	1.339639893	0.0120879	"Jumonji, AT rich interactive domain 1B (RBP2-like)"
BC001007	PRKAB1	201834_at	1.302225483	1.339639893	0.00657302	"protein kinase, AMP-activated, beta 1 non-catalytic subunit"
U15174	BNIP3	201848_s_at	1.33137995	1.339639893	0.00655463	BCL2/adenovirus E1B 19kDa interacting protein 3
NM_005785	RNF41	201962_s_at	1.247183382	1.339639893	0.00624039	ring finger protein 41
NM_014822	SEC24D	202375_at	0.641724997	1.339639893	0.00203183	"SEC24 related gene family, member D (S. cerevisiae)"
NM_014823	WNK1	202940_at	1.339830439	1.339639893	0.00385519	WNK lysine deficient protein kinase 1
NM_006324	CFDP1	203166_at	1.300307817	1.339639893	0.00964155	craniofacial development protein 1
AL525412	MYCBP	203359_s_at	0.78296476	1.339639893	0.0124452	c-myc binding protein
AL133215	C10orf6	203482_at	1.235388682	1.339639893	0.00532642	chromosome 10 open reading frame 6
NM_000081	LYST	203518_at	1.287686008	1.339639893	0.00401815	lysosomal trafficking regulator
NM_007187	WBP4	203599_s_at	1.277496214	1.339639893	0.00886608	WW domain binding protein 4 (formin binding protein 21)
BG249608	RAB11FIP2	203883_s_at	1.368460825	1.339639893	0.0042504	RAB11 family interacting protein 2 (class I)
AI557467	ZBTB40	203958_s_at	1.495006186	1.339639893	0.006879	zinc finger and BTB domain containing 40
NM_007057	ZWINT	204026_s_at	0.817218359	1.339639893	0.00978539	ZW10 interactor
NM_021151	CROT	204573_at	1.220086343	1.339639893	0.00711559	carnitine O-octanoyltransferase
AF124604	GFER	204659_s_at	0.710522276	1.339639893	0.00930456	"growth factor, augmenter of liver regeneration (ERV1 homolog, S. cerevisiae)"
NM_005950	MT1G	204745_x_at	0.345953034	1.339639893	0.00689121	metallothionein 1G
NM_014254	TMEM5	204808_s_at	1.258917966	1.339639893	0.0134304	transmembrane protein 5
NM_002875	RAD51	205024_s_at	0.750423574	1.339639893	0.00430274	"RAD51 homolog (RecA homolog, E. coli) (S. cerevisiae)"
NM_020423	SCYL3	205607_s_at	1.201188602	1.339639893	0.00558846	SCY1-like 3 (S. cerevisiae)
NM_003090	SNRPA1	206055_s_at	0.823183541	1.339639893	0.0107226	small nuclear ribonucleoprotein polypeptide A'
NM_006551	SCGB1D2	206799_at	1.443978788	1.339639893	0.00539402	"secretoglobin, family 1D, member 2"
NM_004091	E2F2	207042_at	0.751991235	1.339639893	0.00269003	E2F transcription factor 2
NM_012485	HMMR	207165_at	0.795052686	1.339639893	0.00587376	hyaluronan-mediated motility receptor (RHAMM)
NM_021998	ZNF6	207781_s_at	1.465521517	1.339639893	0.00331316	zinc finger protein 6 (CMPX1)
NM_018412	ST7	207871_s_at	1.406151665	1.339639893	0.00606201	suppression of tumorigenicity 7
NM_001224	CASP2	208050_s_at	1.24429321	1.339639893	0.00805185	"caspase 2, apoptosis-related cysteine peptidase (neural precursor cell expressed, developmentally down-regulated 2)"
NM_020216	RNPEP	208270_s_at	0.781507218	1.339639893	0.00779253	arginyl aminopeptidase (aminopeptidase B)
NM_005952	MT1X	208581_x_at	0.287040812	1.339639893	0.00579684	metallothionein 1X
M25915	CLU	208791_at	0.816570319	1.339639893	0.00543515	"clusterin (complement lysis inhibitor, SP-40,40, sulfated glycoprotein 2, testosterone-repressed prostate message 2, apolipoprotein J)"
D55716	MCM7	208795_s_at	0.820168136	1.339639893	0.00916409	MCM7 minichromosome maintenance deficient 7 (S. cerevisiae)
AF037448	SYNCRIP	209025_s_at	0.758507856	1.339639893	0.0101186	"synaptotagmin binding, cytoplasmic RNA interacting protein"
D49958	GPM6A	209470_s_at	1.241438819	1.339639893	0.00925855	glycoprotein M6A
AF124491	GIT2	209876_at	1.363741107	1.339639893	0.00354849	G protein-coupled receptor kinase interactor 2
BC000019	CDH6	210602_s_at	0.647188419	1.339639893	0.00130105	"cadherin 6, type 2, K-cadherin (fetal kidney)"
BF689173	C18orf10	212055_at	0.771919137	1.339639893	0.00626083	chromosome 18 open reading frame 10
AB014511	ATP9A	212062_at	1.297540789	1.339639893	0.00598081	"ATPase, Class II, type 9A"
N22859	KIAA0934	212503_s_at	1.205225365	1.339639893	0.00597582	KIAA0934
AW161626	TNPO1	212635_at	1.208276897	1.339639893	0.00717148	Transportin 1
AI922519	RABGAP1	213313_at	1.239547615	1.339639893	0.00732011	RAB GTPase activating protein 1
D63484	ZC3H3	213445_at	1.28607169	1.339639893	0.00412048	zinc finger CCCH-type containing 3
BF593175	DOCK3	213482_at	1.511784297	1.339639893	0.00519117	dedicator of cytokinesis 3
AW978896	TRA2A	213593_s_at	1.366064005	1.339639893	0.00660141	Transformer-2 alpha
AW134976	KIAA0984	213912_at	0.715112692	1.339639893	0.0025637	KIAA0984 protein
BG177920	ANXA11	214783_s_at	1.308909369	1.339639893	0.00532426	annexin A11
AK023959	---	215436_at	1.492700835	1.339639893	0.0041315	---
NM_020117	LARS	217810_x_at	1.208393033	1.339639893	0.00739805	leucyl-tRNA synthetase
NM_012310	KIF4A	218355_at	0.824298257	1.339639893	0.0053068	kinesin family member 4A
NM_021730	NALP1	218380_at	1.502976369	1.339639893	0.00934078	"NACHT, leucine rich repeat and PYD (pyrin domain) containing 1"
NM_024116	MGC5306	218750_at	1.277287487	1.339639893	0.00498609	hypothetical protein MGC5306
NM_014322	OPN3	219032_x_at	1.359948269	1.339639893	0.00619278	"opsin 3 (encephalopsin, panopsin)"
NM_018082	POLR3B	219459_at	0.813260613	1.339639893	0.0097573	polymerase (RNA) III (DNA directed) polypeptide B
NM_017911	C22orf8	219629_at	1.290026797	1.339639893	0.00992441	chromosome 22 open reading frame 8
NM_017669	FLJ20105	219650_at	0.756230966	1.339639893	0.00488481	FLJ20105 protein
NM_016323	HERC5	219863_at	1.948165536	1.339639893	0.00262275	hect domain and RLD 5
NM_025032	FLJ21272	220467_at	1.798187836	1.339639893	0.00997558	hypothetical protein FLJ21272
NM_030793	FBXO38	221257_x_at	1.229786113	1.339639893	0.00537113	F-box protein 38 /// F-box protein 38
BC003186	Pfs2	221521_s_at	0.772758261	1.339639893	0.00630175	DNA replication complex GINS protein PSF2
BF436315	N4BP1	221867_at	1.260871129	1.339639893	0.00351121	Nedd4 binding protein 1
AA775681	C1orf139	221958_s_at	1.364574473	1.339639893	0.00460608	chromosome 1 open reading frame 139
AI160126	---	222001_x_at	1.374278983	1.339639893	0.0078484	LOC440669
BF229395	---	222345_at	1.630503616	1.339639893	0.0021832	Transcribed locus
Z97630	GCAT	36475_at	0.721608643	1.339639893	0.0072095	glycine C-acetyltransferase (2-amino-3-ketobutyrate coenzyme A ligase)
U09366	ZNF133	37254_at	1.227569688	1.339639893	0.00379851	zinc finger protein 133 (clone pHZ-13)
AF070588	LOC55565	41397_at	1.303554249	1.339639893	0.00371161	hypothetical protein LOC55565
AA534894	C9orf28	52975_at	1.343121956	1.339639893	0.00404916	chromosome 9 open reading frame 28
AI885411	FLJ22222	53071_s_at	0.697757917	1.339639893	0.0066319	hypothetical protein FLJ22222
NM_015049	ALS2CR3	202125_s_at	1.21178117	1.570344132	0.0120627	"amyotrophic lateral sclerosis 2 (juvenile) chromosome region, candidate 3"
NM_005646	TARBP1	202813_at	1.310606862	1.570344132	0.00581103	TAR (HIV) RNA binding protein 1
NM_024165	PHF1	202928_s_at	1.442557455	1.570344132	0.00854056	PHD finger protein 1
NM_005886	KATNB1	203163_at	0.73903501	1.570344132	0.00531751	katanin p80 (WD repeat containing) subunit B 1
NM_014901	RNF44	203286_at	1.29178079	1.570344132	0.0151736	ring finger protein 44
NM_002914	RFC2	203696_s_at	0.783321659	1.570344132	0.00738037	"replication factor C (activator 1) 2, 40kDa"
NM_006084	ISGF3G	203882_at	1.344991814	1.570344132	0.00678314	"interferon-stimulated transcription factor 3, gamma 48kDa"
NM_002450	MT1X	204326_x_at	0.295558828	1.570344132	0.0071717	metallothionein 1X
NM_004523	KIF11	204444_at	0.81563981	1.570344132	0.00584557	kinesin family member 11
NM_005518	HMGCS2	204607_at	1.45792688	1.570344132	0.0105631	3-hydroxy-3-methylglutaryl-Coenzyme A synthase 2 (mitochondrial)
NM_000048	ASL	204608_at	0.768101651	1.570344132	0.00635091	argininosuccinate lyase
AW772140	WDHD1	204727_at	0.72846412	1.570344132	0.00311061	WD repeat and HMG-box DNA binding protein 1
NM_003243	TGFBR3	204731_at	1.400407141	1.570344132	0.00352248	"transforming growth factor, beta receptor III (betaglycan, 300kDa)"
NM_004512	IL11RA	204773_at	1.453113413	1.570344132	0.0102774	"interleukin 11 receptor, alpha"
NM_000905	NPY	206001_at	1.44419668	1.570344132	0.0110622	neuropeptide Y
NM_001915	CYB561	207986_x_at	1.243982943	1.570344132	0.0117743	cytochrome b-561
NM_003671	CDC14B	208022_s_at	1.587817368	1.570344132	0.00338108	CDC14 cell division cycle 14 homolog B (S. cerevisiae) /// CDC14 cell division cycle 14 homolog B (S. cerevisiae)
NM_030941	LOC81691	208107_s_at	0.690702533	1.570344132	0.00942967	exonuclease NEF-sp /// exonuclease NEF-sp
M23254	CAPN2	208683_at	1.674756726	1.570344132	0.0137317	"calpain 2, (m/II) large subunit"
AL022726	ID4	209292_at	1.354757063	1.570344132	0.00635191	"Inhibitor of DNA binding 4, dominant negative helix-loop-helix protein"
AW297143	HBS1L	209315_at	1.379948752	1.570344132	0.00311517	HBS1-like (S. cerevisiae)
N25915	CUGBP1	209489_at	1.254283049	1.570344132	0.00975562	"CUG triplet repeat, RNA binding protein 1"
BC001453	GSTZ1	209531_at	0.810365873	1.570344132	0.00780176	glutathione transferase zeta 1 (maleylacetoacetate isomerase)
L07515	CBX5	209715_at	0.755114966	1.570344132	0.00708568	"chromobox homolog 5 (HP1 alpha homolog, Drosophila)"
AF182198	ITSN2	209907_s_at	1.203370949	1.570344132	0.00653734	intersectin 2
AF021233	TNFRSF10D	210654_at	1.427540073	1.570344132	0.00265571	"tumor necrosis factor receptor superfamily, member 10d, decoy with truncated death domain"
AF135593	VPS41	210849_s_at	1.246195233	1.570344132	0.0128233	vacuolar protein sorting 41 (yeast)
Z25426	MAP4K5	211081_s_at	1.289385673	1.570344132	0.00846027	mitogen-activated protein kinase kinase kinase kinase 5 /// mitogen-activated protein kinase kinase kinase kinase 5
AF087481	JARID1B	211202_s_at	1.606345276	1.570344132	0.0133698	"Jumonji, AT rich interactive domain 1B (RBP2-like)"
AF333388	RPL35	211456_x_at	0.298795832	1.570344132	0.00759829	Similar to 60S ribosomal protein L35
AW081113	C6orf111	212177_at	1.213779603	1.570344132	0.00687414	chromosome 6 open reading frame 111
NM_005953	MT2A	212185_x_at	0.341200092	1.570344132	0.00891867	metallothionein 2A
NM_003765	STX10	212625_at	1.346809908	1.570344132	0.0178591	syntaxin 10
AB002347	UBR2	212760_at	1.215944066	1.570344132	0.0109623	ubiquitin protein ligase E3 component n-recognin 2
AI375919	HOXA10	213147_at	0.670067531	1.570344132	0.00475771	homeo box A10
AL031447	THAP3	213192_at	1.405294898	1.570344132	0.00415219	"THAP domain containing, apoptosis associated protein 3"
AB007964	KIAA0495	213339_at	1.388487628	1.570344132	0.00400795	KIAA0495
BF246115	MT1F	213629_x_at	0.386912839	1.570344132	0.00570618	metallothionein 1F (functional)
BE503392	---	213637_at	1.280251781	1.570344132	0.0160311	"Transcribed locus, moderately similar to XP_517655.1 PREDICTED: similar to KIAA0825 protein [Pan troglodytes]"
AW027347	RSBN1	213694_at	1.29218272	1.570344132	0.0109302	round spermatid basic protein 1
BE326952	GGCX	214006_s_at	0.785122693	1.570344132	0.00623147	gamma-glutamyl carboxylase
AI084637	ABCC6	214033_at	0.732129548	1.570344132	0.00338339	"ATP-binding cassette, sub-family C (CFTR/MRP), member 6"
U90917	FOXM1	214148_at	1.453082499	1.570344132	0.0124552	Forkhead box M1
NM_005059	RLN2	214519_s_at	1.65435761	1.570344132	0.0126497	relaxin 2
AC004381	LOC81691	215215_s_at	0.75788444	1.570344132	0.0124376	exonuclease NEF-sp
AU158442	---	215555_at	1.94843632	1.570344132	0.00149378	"CDNA FLJ13712 fis, clone PLACE2000394"
AL121845	ARFRP1	215984_s_at	0.736648424	1.570344132	0.00482922	ADP-ribosylation factor related protein 1
AL049351	SEC8L1	216538_at	1.34099672	1.570344132	0.00487029	SEC8-like 1 (S. cerevisiae)
AK024108	---	217164_at	1.22071799	1.570344132	0.0036319	---
N35922	---	217586_x_at	1.25480624	1.570344132	0.00540155	---
NM_018031	WDR6	217734_s_at	1.330340448	1.570344132	0.0168541	WD repeat domain 6
NM_021178	CCNB1IP1	217988_at	1.239138552	1.570344132	0.0112082	cyclin B1 interacting protein 1
NM_018697	LANCL2	218219_s_at	0.805541299	1.570344132	0.00393014	LanC lantibiotic synthetase component C-like 2 (bacterial)
NM_022346	HCAP-G	218663_at	0.799399805	1.570344132	0.00607599	chromosome condensation protein G
NM_024053	C22orf18	218741_at	0.767418549	1.570344132	0.00966431	chromosome 22 open reading frame 18
NM_024591	CHMP6	218743_at	0.792084497	1.570344132	0.00444524	chromatin modifying protein 6
NM_024960	PANK2	218809_at	0.810955613	1.570344132	0.00580685	pantothenate kinase 2 (Hallervorden-Spatz syndrome)
NM_018048	FLJ10292	218894_s_at	0.807295859	1.570344132	0.00361821	mago-nashi homolog
NM_025203	FLJ21945	219120_at	1.425803754	1.570344132	0.00596782	hypothetical protein FLJ21945
NM_023112	OTUB2	219369_s_at	1.796161609	1.570344132	0.00538932	"OTU domain, ubiquitin aldehyde binding 2"
NM_014343	CLDN15	219640_at	1.325468173	1.570344132	0.00713525	claudin 15
NM_014270	SLC7A9	220135_s_at	1.465729299	1.570344132	0.00662736	"solute carrier family 7 (cationic amino acid transporter, y+ system), member 9"
NM_021731	C19orf28	220178_at	1.245800087	1.570344132	0.00587751	chromosome 19 open reading frame 28
NM_012139	DELGEF	220482_s_at	1.406690835	1.570344132	0.00439676	deafness locus associated putative guanine nucleotide exchange factor
NM_015715	PLA2G3	220780_at	1.238650267	1.570344132	0.0151493	"phospholipase A2, group III"
NM_030805	LMAN2L	221274_s_at	1.238193253	1.570344132	0.0100412	"lectin, mannose-binding 2-like /// lectin, mannose-binding 2-like"
BG168666	DNAJC10	221782_at	0.653258184	1.570344132	0.00621398	"DnaJ (Hsp40) homolog, subfamily C, member 10"
AB040897	RANBP10	221809_at	1.411082305	1.570344132	0.00724539	RAN binding protein 10
AW162015	ZNF143	221873_at	1.716992201	1.570344132	0.0175443	zinc finger protein 143 (clone pHZ-1)
AW195581	GPSM2	221922_at	0.807052189	1.570344132	0.00547714	"G-protein signalling modulator 2 (AGS3-like, C. elegans)"
AK022644	MGC3101	222234_s_at	1.442332105	1.570344132	0.00733177	hypothetical protein MGC3101
M60459	EPOR	37986_at	1.212367613	1.570344132	0.00192998	erythropoietin receptor
AA911739	SCLY	59705_at	0.613219217	1.570344132	0.00104844	selenocysteine lyase
AA601208	MGC13098	60815_at	1.297144804	1.570344132	0.00639716	hypothetical protein MGC13098
NM_004078	CSRP1	200621_at	0.702654707	1.869878191	0.0091843	cysteine and glycine-rich protein 1
NM_003349	RNPEP /// UBE2V1 /// Kua /// Kua-UEV	201003_x_at	0.818507419	1.869878191	0.00975436	arginyl aminopeptidase (aminopeptidase B) /// ubiquitin-conjugating enzyme E2 variant 1 /// ubiquitin-conjugating enzyme variant Kua /// ubiquitin-conjugating enzyme E2 variant 1
BE966236	RRM2	201890_at	0.731783072	1.869878191	0.0126612	ribonucleotide reductase M2 polypeptide
BF213279	FARP1	201910_at	1.269988727	1.869878191	0.0140672	"FERM, RhoGEF (ARHGEF) and pleckstrin domain protein 1 (chondrocyte-derived)"
BC003584	DHFR	202533_s_at	0.809129415	1.869878191	0.00771176	dihydrofolate reductase
NM_004301	ACTL6A	202666_s_at	0.739217705	1.869878191	0.00809396	actin-like 6A
BC002558	JMJD2A	203204_s_at	1.226760346	1.869878191	0.0101593	jumonji domain containing 2A
NM_012342	BAMBI	203304_at	0.817852878	1.869878191	0.00446364	BMP and activin membrane-bound inhibitor homolog (Xenopus laevis)
NM_016194	GNB5	204000_at	1.293722373	1.869878191	0.0114885	"guanine nucleotide binding protein (G protein), beta 5"
NM_003504	CDC45L	204126_s_at	0.713123304	1.869878191	0.00968736	CDC45 cell division cycle 45-like (S. cerevisiae)
AW194947	ENPP4	204160_s_at	1.207264567	1.869878191	0.0174375	ectonucleotide pyrophosphatase/phosphodiesterase 4 (putative function)
NM_015654	NAT9	204382_at	1.209759045	1.869878191	0.0085702	N-acetyltransferase 9
AF031463	PDCL	204448_s_at	1.243694213	1.869878191	0.0113073	phosducin-like
NM_002613	PDPK1	204524_at	1.207802658	1.869878191	0.00905342	3-phosphoinositide dependent protein kinase-1
NM_005855	RAMP1	204916_at	1.218105199	1.869878191	0.0215347	receptor (calcitonin) activity modifying protein 1
NM_001406	EFNB3	205031_at	1.349585766	1.869878191	0.00867129	ephrin-B3
NM_003186	TAGLN	205547_s_at	1.438272747	1.869878191	0.00417488	transgelin
NM_007215	POLG2	205811_at	1.200684957	1.869878191	0.00826785	"polymerase (DNA directed), gamma 2, accessory subunit"
NM_014834	---	206088_at	1.314498075	1.869878191	0.00489329	"PREDICTED: Homo sapiens similar to Hypothetical protein KIAA0563 (LOC440457), mRNA"
NM_021067	PSF1	206102_at	0.831057726	1.869878191	0.0089891	DNA replication complex GINS protein PSF1
NM_018057	SLC6A15	206376_at	1.24941092	1.869878191	0.0156327	"solute carrier family 6, member 15"
NM_005951	MT1H	206461_x_at	0.27113123	1.869878191	0.00760855	metallothionein 1H
NM_025105	NGLY1	207492_at	1.452007771	1.869878191	0.00789148	N-glycanase 1
NM_003033	ST3GAL1	208322_s_at	1.399367215	1.869878191	0.0159825	"ST3 beta-galactoside alpha-2,3-sialyltransferase 1"
AF204231	GOLGA8A	208798_x_at	1.522450728	1.869878191	0.00863765	"golgi autoantigen, golgin subfamily a, 8A"
BG391171	TMPO	209753_s_at	0.825456524	1.869878191	0.00736998	thymopoietin
AF091352	VEGF	210513_s_at	1.220548494	1.869878191	0.00952519	vascular endothelial growth factor
BC002944	EPPB9	210534_s_at	0.655926183	1.869878191	0.00710539	B9 protein
AF279900	MCM7	210983_s_at	0.821618531	1.869878191	0.0114065	MCM7 minichromosome maintenance deficient 7 (S. cerevisiae)
M77227	HGF	210997_at	0.695145672	1.869878191	0.00786722	hepatocyte growth factor (hepapoietin A; scatter factor)
BC006422	PFKL	211065_x_at	0.788191948	1.869878191	0.00768857	"phosphofructokinase, liver /// phosphofructokinase, liver"
AF020340	GUCY1B3	211555_s_at	1.250557687	1.869878191	0.00588676	"guanylate cyclase 1, soluble, beta 3"
BF055496	DKFZP586J0619	212212_s_at	0.816814843	1.869878191	0.01041	DKFZP586J0619 protein
BE906572	GALNT10	212256_at	1.551533806	1.869878191	0.0130723	UDP-N-acetyl-alpha-D-galactosamine:polypeptide N-acetylgalactosaminyltransferase 10 (GalNAc-T10)
AL117461	YIPF6	212343_at	1.222155057	1.869878191	0.0215534	"Yip1 domain family, member 6"
BE568219	PDE8A	212521_s_at	1.25928974	1.869878191	0.0136695	phosphodiesterase 8A
AJ223321	ZNF238	212774_at	2.028998393	1.869878191	0.0125475	zinc finger protein 238
AA521267	JMJD3	213146_at	1.386051805	1.869878191	0.0140875	jumonji domain containing 3
R61519	COG7	213190_at	1.223819913	1.869878191	0.0154866	component of oligomeric golgi complex 7
W74620	HNRPD	213359_at	1.543203398	1.869878191	0.011611	"Heterogeneous nuclear ribonucleoprotein D (AU-rich element RNA binding protein 1, 37kDa)"
AL049987	C6orf216	213605_s_at	1.270838202	1.869878191	0.0133939	"Glucuronidase, beta-like 1 /// Glucuronidase, beta-like 2"
AI871396	ZNF500	213639_s_at	1.203698996	1.869878191	0.00848923	zinc finger protein 500
AB011129	ZNF500	213641_at	1.569643088	1.869878191	0.0150791	zinc finger protein 500
AF305057	ENOSF1	213645_at	1.257758137	1.869878191	0.0116855	enolase superfamily member 1
AW991219	SCC-112	213984_at	0.686336601	1.869878191	0.0034371	SCC-112 protein
AI560455	PCGF2	214239_x_at	1.222496717	1.869878191	0.0141741	polycomb group ring finger 2
BF440025	NOV	214321_at	1.808114716	1.869878191	0.00361815	nephroblastoma overexpressed gene
AV683882	ROCK1	214578_s_at	1.421573544	1.869878191	0.0105629	"Rho-associated, coiled-coil containing protein kinase 1"
AW954107	MAN2B2	214703_s_at	1.222239918	1.869878191	0.0149715	"mannosidase, alpha, class 2B, member 2"
AV728658	FAM21B /// FAM21C /// LOC387680 /// LOC439973	214946_x_at	1.29955787	1.869878191	0.0237996	"family with sequence similarity 21, member B /// family with sequence similarity 21, member C /// similar to KIAA0592 protein /// similar to KIAA0592 protein"
AF035321	DNM1	215116_s_at	1.344266768	1.869878191	0.00966358	dynamin 1
AL049250	LOC348162	215123_at	1.439978343	1.869878191	0.00507566	hypothetical protein 348162
AL121936	BTN2A1	215493_x_at	1.211505338	1.869878191	0.018289	"butyrophilin, subfamily 2, member A1"
AB051448	KIAA1661	215943_at	1.824220205	1.869878191	0.0047407	KIAA1661 protein
AA807529	MCM5	216237_s_at	0.75915534	1.869878191	0.00891534	"MCM5 minichromosome maintenance deficient 5, cell division cycle 46 (S. cerevisiae)"
AL031602	MT1K	216336_x_at	0.354804233	1.869878191	0.00846284	Metallothionein 1M
AC007277	HMGB1 /// HMG1L1	216508_x_at	0.747166616	1.869878191	0.00745577	high-mobility group box 1 /// high-mobility group (nonhistone chromosomal) protein 1-like 1
AL049252	---	216527_at	1.365306767	1.869878191	0.00464774	MRNA; cDNA DKFZp564D193 (from clone DKFZp564D193)
BF347113	RUTBC1	217538_at	1.414833685	1.869878191	0.00139179	RUN and TBC1 domain containing 1
NM_012460	TIMM9	218316_at	1.231374826	1.869878191	0.011344	translocase of inner mitochondrial membrane 9 homolog (yeast)
AF118887	VAV3	218806_s_at	1.368252314	1.869878191	0.0101559	vav 3 oncogene
NM_013239	PPP2R3B	219264_s_at	0.781588145	1.869878191	0.00402272	"protein phosphatase 2 (formerly 2A), regulatory subunit B'', beta"
NM_018157	RIC8B	219446_at	1.203634165	1.869878191	0.00942465	resistance to inhibitors of cholinesterase 8 homolog B (C. elegans)
NM_018301	FLJ11016	219754_at	1.233123728	1.869878191	0.00665962	hypothetical protein FLJ11016
NM_024944	CHODL	219867_at	0.791737556	1.869878191	0.00227831	chondrolectin
NM_018621	MAN2A2	219999_at	1.242054776	1.869878191	0.00509125	"mannosidase, alpha, class 2A, member 2"
NM_018001	LRRC37A /// FLJ10120 /// FLJ34306 /// LOC474170	220219_s_at	1.208267101	1.869878191	0.00770029	leucine rich repeat containing 37A /// hypothetical protein FLJ10120 /// FLJ34306 protein /// c114 SLIT-like testicular protein
NM_018846	KLHL7	220239_at	0.656729274	1.869878191	0.0107499	kelch-like 7 (Drosophila)
NM_007071	HHLA3	220387_s_at	1.297065867	1.869878191	0.00830234	HERV-H LTR-associating 3
NM_018275	FLJ10925	220659_s_at	1.253466836	1.869878191	0.00592615	hypothetical protein FLJ10925
NM_013348	KCNJ14	220776_at	1.455890412	1.869878191	0.00492476	"potassium inwardly-rectifying channel, subfamily J, member 14"
NM_014317	TPRT	220865_s_at	0.826797633	1.869878191	0.00803548	trans-prenyltransferase
NM_030929	KAZALD1	221000_s_at	0.801203181	1.869878191	0.00481539	Kazal-type serine peptidase inhibitor domain 1 /// Kazal-type serine peptidase inhibitor domain 1
NM_024734	CLMN	221042_s_at	0.709320709	1.869878191	0.00410758	"calmin (calponin-like, transmembrane)"
NM_004748	CCPG1	221156_x_at	0.743778065	1.869878191	0.000700884	cell cycle progression 1
NM_030937	CCNL2	221427_s_at	1.299146291	1.869878191	0.0110462	cyclin L2 /// cyclin L2
BF575213	MGC5618	221477_s_at	1.209411613	1.869878191	0.0121539	hypothetical protein MGC5618
BE217882	KIAA1718	221778_at	1.372589091	1.869878191	0.0106668	KIAA1718 protein
AI826075	CTGLF1 /// LOC399753 /// FLJ00312 /// LOC399768	221850_x_at	1.216915601	1.869878191	0.0136722	"centaurin, gamma-like family, member 1 /// hypothetical gene supported by AK093334; AL833330; BC020871; BC032492 /// similar to ARF GTPase-activating protein /// hypothetical gene supported by AK093334; AL833330; BC020871; BC032492"
U83981	PPP1R15A	37028_at	1.252764477	1.869878191	0.0136903	"protein phosphatase 1, regulatory (inhibitor) subunit 15A"
NM_004343	CALR	200935_at	0.815149502	2.370593872	0.0151953	calreticulin
NM_002826	QSCN6	201482_at	1.415286958	2.370593872	0.0124547	quiescin Q6
NM_004090	DUSP3	201538_s_at	1.293519472	2.370593872	0.0166784	dual specificity phosphatase 3 (vaccinia virus phosphatase VH1-related)
NM_014236	GNPAT	201956_s_at	1.206343943	2.370593872	0.0204689	glyceronephosphate O-acyltransferase
N64643	ALS4	201964_at	1.206047169	2.370593872	0.0112201	amyotrophic lateral sclerosis 4
NM_004491	GRLF1	202046_s_at	0.785756652	2.370593872	0.00488817	glucocorticoid receptor DNA binding factor 1
BC002374	KPNA1	202057_at	1.272518732	2.370593872	0.00870761	karyopherin alpha 1 (importin alpha 5)
NM_014734	KIAA0247	202181_at	1.227194023	2.370593872	0.0158935	KIAA0247
NM_014938	MONDOA	202519_at	1.209347959	2.370593872	0.0183373	MondoA
NM_000791	DHFR	202534_x_at	0.806425715	2.370593872	0.0190685	dihydrofolate reductase
AF051851	SVIL	202566_s_at	1.245222286	2.370593872	0.00577806	supervillin
AI206560	ZF	202977_s_at	1.264592089	2.370593872	0.00555873	HCF-binding transcription factor Zhangfei
NM_014641	MDC1	203062_s_at	0.809484258	2.370593872	0.0132895	mediator of DNA damage checkpoint 1
NM_014396	VPS41	203106_s_at	1.35822861	2.370593872	0.0125049	vacuolar protein sorting 41 (yeast)
NM_007370	RFC5	203210_s_at	0.79959295	2.370593872	0.00925443	"replication factor C (activator 1) 5, 36.5kDa"
NM_000332	ATXN1	203232_s_at	1.31931128	2.370593872	0.0101132	ataxin 1
NM_014727	MLL4	203419_at	1.378720601	2.370593872	0.0140004	myeloid/lymphoid or mixed-lineage leukemia 4
NM_001745	CAMLG	203538_at	1.22448314	2.370593872	0.0192981	calcium modulating ligand
NM_014733	ZFYVE16	203651_at	1.269361504	2.370593872	0.0156865	"zinc finger, FYVE domain containing 16"
NM_007049	BTN2A1	203944_x_at	1.202022583	2.370593872	0.0111222	"butyrophilin, subfamily 2, member A1"
NM_007182	RASSF1	204346_s_at	1.321954482	2.370593872	0.017278	Ras association (RalGDS/AF-6) domain family 1
NM_022912	C2orf23	204365_s_at	1.667327775	2.370593872	0.0161182	chromosome 2 open reading frame 23
NM_003248	THBS4	204776_at	1.524147481	2.370593872	0.00637162	thrombospondin 4
NM_004463	FGD1	204819_at	1.311306811	2.370593872	0.0102928	"FYVE, RhoGEF and PH domain containing 1 (faciogenital dysplasia)"
NM_006299	ZNF193	205181_at	1.342404369	2.370593872	0.0128154	zinc finger protein 193
NM_005670	EPM2A	205231_s_at	1.682902177	2.370593872	0.0159797	"epilepsy, progressive myoclonus type 2A, Lafora disease (laforin)"
AL022328	MAPK12	206106_at	0.776552516	2.370593872	0.00965027	mitogen-activated protein kinase 12
NM_004900	APOBEC3B	206632_s_at	0.624133819	2.370593872	0.0147128	"apolipoprotein B mRNA editing enzyme, catalytic polypeptide-like 3B"
NM_006578	GNB5	207124_s_at	1.238258405	2.370593872	0.00762394	"guanine nucleotide binding protein (G protein), beta 5"
NM_015416	LETMD1	207170_s_at	1.233126045	2.370593872	0.0290049	LETM1 domain containing 1
NM_000385	AQP1	207542_s_at	1.364652752	2.370593872	0.00781364	"aquaporin 1 (channel-forming integral protein, 28kDa)"
NM_004575	POU4F2	207725_at	1.588471076	2.370593872	0.0230416	"POU domain, class 4, transcription factor 2"
NM_002533	NVL	207877_s_at	1.218224578	2.370593872	0.0133726	nuclear VCP-like
AF116710	RPS14	208646_at	1.235437162	2.370593872	0.0252943	ribosomal protein S14
AA043348	HSPA4	208814_at	1.259096443	2.370593872	0.0142498	Heat shock 70kDa protein 4
BF431363	FLJ46061 /// RPS28	208902_s_at	1.4602364	2.370593872	0.0287635	Ankyrin repeat domain 47 /// Ribosomal protein S28
AB017493	KLF6	208961_s_at	1.327120131	2.370593872	0.0235734	Kruppel-like factor 6
BC001886	RRM2	209773_s_at	0.758718814	2.370593872	0.0186207	ribonucleotide reductase M2 polypeptide
AF078844	---	210524_x_at	0.39502599	2.370593872	0.0101511	---
U46010	HGF	210755_at	0.74424837	2.370593872	0.01086	hepatocyte growth factor (hepapoietin A; scatter factor)
U94510	TNFRSF25	211841_s_at	1.585201202	2.370593872	0.00867281	"tumor necrosis factor receptor superfamily, member 25"
AK025446	RSL1D1	212019_at	1.239063778	2.370593872	0.0161162	ribosomal L1 domain containing 1
AA994666	AP2A2	212161_at	1.266743546	2.370593872	0.0118852	"adaptor-related protein complex 2, alpha 2 subunit"
BE880828	MCFD2	212246_at	0.817302455	2.370593872	0.0103506	multiple coagulation factor deficiency 2
AL037557	POLR2I	212955_s_at	0.821460457	2.370593872	0.0170273	"polymerase (RNA) II (DNA directed) polypeptide I, 14.5kDa"
AI022882	PAM	212958_x_at	1.267539166	2.370593872	0.0196126	peptidylglycine alpha-amidating monooxygenase
AV705938	SHC2	213464_at	1.351293916	2.370593872	0.0133373	SHC (Src homology 2 domain containing) transforming protein 2
AI350500	ZNF688	213529_at	0.832439386	2.370593872	0.0037215	zinc finger protein 688
AL049387	---	213739_at	1.283925289	2.370593872	0.00692283	MRNA; cDNA DKFZp564M042 (from clone DKFZp564M042)
AW337510	COX4I1	213758_at	1.532976439	2.370593872	0.0107852	cytochrome c oxidase subunit IV isoform 1
Z98752	L3MBTL	213837_at	1.489250541	2.370593872	0.00652275	l(3)mbt-like (Drosophila)
AW149846	GPX3	214091_s_at	0.678124553	2.370593872	0.00356388	glutathione peroxidase 3 (plasma)
AI734124	RPS14	214245_at	1.352262437	2.370593872	0.0160284	ribosomal protein S14
AB037854	CTTNBP2NL	214731_at	1.365403437	2.370593872	0.0207644	CTTNBP2 N-terminal like
AB007958	TMEM63A	214833_at	1.534578949	2.370593872	0.0103084	transmembrane protein 63A
AV704232	---	215128_at	1.219165858	2.370593872	0.0230856	"CDNA FLJ11682 fis, clone HEMBA1004880"
AL137378	---	216144_at	1.297372129	2.370593872	0.00268152	MRNA; cDNA DKFZp434K1126 (from clone DKFZp434K1126)
AK024995	GALNT7	216756_at	1.787001138	2.370593872	0.00145767	UDP-N-acetyl-alpha-D-galactosamine:polypeptide N-acetylgalactosaminyltransferase 7 (GalNAc-T7)
AL080112	---	216858_x_at	1.255801283	2.370593872	0.0141465	---
M10943	MT1F	217165_x_at	0.307170274	2.370593872	0.0104911	metallothionein 1F (functional)
AJ275978	CTAG1B	217339_x_at	1.235548383	2.370593872	0.0173095	cancer/testis antigen 1B
NM_014371	AKAP8L	218064_s_at	1.27428539	2.370593872	0.0147922	A kinase (PRKA) anchor protein 8-like
NM_021622	PLEKHA1	219024_at	1.287738846	2.370593872	0.0145495	"pleckstrin homology domain containing, family A (phosphoinositide binding specific) member 1"
NM_017656	ZNF562	219163_at	1.25115936	2.370593872	0.00949138	zinc finger protein 562
NM_018245	OGDHL	219277_s_at	1.478594729	2.370593872	0.0126519	oxoglutarate dehydrogenase-like
NM_024509	LRFN3	219346_at	1.406912811	2.370593872	0.0103757	leucine rich repeat and fibronectin type III domain containing 3
NM_024813	C1orf82	219504_s_at	1.243846337	2.370593872	0.00724628	chromosome 1 open reading frame 82
NM_024918	C20orf172	219512_at	0.813652728	2.370593872	0.00741593	chromosome 20 open reading frame 172
NM_022840	METTL4	219698_s_at	1.236666495	2.370593872	0.0113951	methyltransferase like 4
AF288410	SLC26A6	221572_s_at	1.226883323	2.370593872	0.0121906	"solute carrier family 26, member 6"
BC001972	MGC5306	221580_s_at	1.253851121	2.370593872	0.0208105	hypothetical protein MGC5306
AF195624	CHPT1	221675_s_at	0.803161878	2.370593872	0.0106352	choline phosphotransferase 1
AL524093	C19orf10	221739_at	0.809013186	2.370593872	0.00982418	chromosome 19 open reading frame 10
BE672818	CTGLF1 /// LOC399753 /// FLJ00312 /// CTGLF2	221971_x_at	1.218498281	2.370593872	0.0134463	"centaurin, gamma-like family, member 1 /// hypothetical gene supported by AK093334; AL833330; BC020871; BC032492 /// similar to ARF GTPase-activating protein /// centaurin, gamma-like family, member 2"
AI925734	---	221992_at	1.200035233	2.370593872	0.00438021	MRNA; cDNA DKFZp686B0962 (from clone DKFZp686B0962)
AK023669	BM039	222118_at	0.756322612	2.370593872	0.00960229	uncharacterized bone marrow protein BM039
AB002356	MADD	38398_at	1.277764067	2.370593872	0.0173225	MAP-kinase activating death domain
AI806628	WDR48	56919_at	1.413391521	2.370593872	0.0161689	WD repeat domain 48
NM_004184	WARS	200629_at	0.797983658	2.831732969	0.0125749	tryptophanyl-tRNA synthetase
BG402105	RB1CC1	202033_s_at	1.209917409	2.831732969	0.0203735	RB1-inducible coiled-coil 1
NM_005030	PLK1	202240_at	0.737106271	2.831732969	0.0157827	polo-like kinase 1 (Drosophila)
BF346592	DLGAP4	202570_s_at	1.365529783	2.831732969	0.00909363	"discs, large (Drosophila) homolog-associated protein 4"
AL558030	POLR2K	202634_at	0.796891759	2.831732969	0.0203559	"polymerase (RNA) II (DNA directed) polypeptide K, 7.0kDa"
NM_003681	PDXK	202671_s_at	0.698440212	2.831732969	0.0181367	"pyridoxal (pyridoxine, vitamin B6) kinase"
NM_002863	PYGL	202990_at	1.496306466	2.831732969	0.0262714	"phosphorylase, glycogen; liver (Hers disease, glycogen storage disease type VI)"
NM_005886	KATNB1	203162_s_at	0.734015744	2.831732969	0.0112562	katanin p80 (WD repeat containing) subunit B 1
BG029530	JARID2	203297_s_at	1.309166592	2.831732969	0.0199846	"Jumonji, AT rich interactive domain 2"
NM_004973	JARID2	203298_s_at	1.287407243	2.831732969	0.0303044	"Jumonji, AT rich interactive domain 2"
U77949	CDC6	203967_at	0.832229573	2.831732969	0.0112593	CDC6 cell division cycle 6 homolog (S. cerevisiae)
NM_002829	PTPN3	203997_at	1.205217255	2.831732969	0.0209418	"protein tyrosine phosphatase, non-receptor type 3"
AI340239	GTSE1	204315_s_at	0.82664021	2.831732969	0.0102351	G-2 and S-phase expressed 1
NM_003503	CDC7	204510_at	0.80964611	2.831732969	0.0148105	CDC7 cell division cycle 7 (S. cerevisiae)
NM_006985	NPIP /// LOC339047 /// LOC440341	204538_x_at	1.30811198	2.831732969	0.0231654	nuclear pore complex interacting protein /// hypothetical protein LOC339047 /// similar to hypothetical protein LOC339047
NM_004435	ENDOG	204824_at	0.8322036	2.831732969	0.0124869	endonuclease G
NM_002151	HPN	204934_s_at	1.330234736	2.831732969	0.0219651	"hepsin (transmembrane protease, serine 1)"
NM_001311	CRIP1	205081_at	0.603558813	2.831732969	0.0119064	cysteine-rich protein 1 (intestinal)
NM_012323	MAFF	205193_at	1.261841082	2.831732969	0.020661	v-maf musculoaponeurotic fibrosarcoma oncogene homolog F (avian)
NM_000216	KAL1	205206_at	1.266672815	2.831732969	0.0159599	Kallmann syndrome 1 sequence
W58757	BTN2A2	205298_s_at	1.298397931	2.831732969	0.0240087	"butyrophilin, subfamily 2, member A2"
NM_018952	HOXB6	205366_s_at	1.295099775	2.831732969	0.0182255	homeo box B6
NM_012263	TTLL1	205652_s_at	1.63083214	2.831732969	0.0120053	"tubulin tyrosine ligase-like family, member 1"
NM_006729	DIAPH2	205726_at	1.212336161	2.831732969	0.0168828	diaphanous homolog 2 (Drosophila)
NM_002742	PRKD1	205880_at	1.337197466	2.831732969	0.0128944	protein kinase D1
NM_006681	NMU	206023_at	0.757313889	2.831732969	0.0160527	neuromedin U
NM_003418	ZNF9	206158_s_at	0.798603153	2.831732969	0.0126167	zinc finger protein 9 (a cellular retroviral nucleic acid binding protein)
NM_002041	GABPB2	206173_x_at	0.760459461	2.831732969	0.0146653	"GA binding protein transcription factor, beta subunit 2"
U23772	XCL2	206366_x_at	1.356244173	2.831732969	0.0143049	chemokine (C motif) ligand 2
NM_017776	ZNF673	206583_at	1.358192574	2.831732969	0.0184661	zinc finger protein 673
NM_001108	ACYP2	206833_s_at	1.291733627	2.831732969	0.019931	"acylphosphatase 2, muscle type"
NM_006896	HOXA7	206848_at	1.263764871	2.831732969	0.0167611	homeo box A7
NM_006867	RBPMS	207836_s_at	1.357843985	2.831732969	0.00900669	RNA binding protein with multiple splicing
U87954	PA2G4	208676_s_at	0.776143974	2.831732969	0.0153352	"proliferation-associated 2G4, 38kDa"
U30872	CENPF	209172_s_at	0.795167876	2.831732969	0.00825084	"centromere protein F, 350/400ka (mitosin) /// centromere protein F, 350/400ka (mitosin)"
L11669	TETRAN	209215_at	1.254735186	2.831732969	0.0186082	tetracycline transporter-like protein
AF146074	ABCC5	209380_s_at	1.250177054	2.831732969	0.0296332	"ATP-binding cassette, sub-family C (CFTR/MRP), member 5"
AL136860	TBC1D3 /// TBC1D3C	209403_at	1.304453521	2.831732969	0.0210705	"TBC1 domain family, member 3 /// TBC1 domain family, member 3C"
BC003503	RBM30	209497_s_at	1.225417365	2.831732969	0.0224995	RNA binding motif protein 30
AF225416	SPBC25	209891_at	0.780386947	2.831732969	0.00819374	spindle pole body component 25 homolog (S. cerevisiae)
U89330	MAP2	210015_s_at	0.82460547	2.831732969	0.00848418	microtubule-associated protein 2
U62733	CHKB /// CPT1B	210070_s_at	1.294549842	2.831732969	0.0164915	choline kinase beta /// carnitine palmitoyltransferase 1B (muscle)
AF084513	RAD1	210216_x_at	0.78300394	2.831732969	0.0174305	RAD1 homolog (S. pombe)
AB028869	BIRC5	210334_x_at	0.746712615	2.831732969	0.0206309	baculoviral IAP repeat-containing 5 (survivin)
U71087	MAP2K5	210482_x_at	1.294247634	2.831732969	0.0168866	mitogen-activated protein kinase kinase 5
AF070651	ZNF257	210697_at	0.719585786	2.831732969	0.00424276	zinc finger protein 257
BC006456	FAM21C /// LOC439973	211068_x_at	1.208041359	2.831732969	0.0366165	"family with sequence similarity 21, member C /// family with sequence similarity 21, member C /// similar to KIAA0592 protein /// similar to KIAA0592 protein"
D45864	PRKG1	211380_s_at	1.476478537	2.831732969	0.0135312	"protein kinase, cGMP-dependent, type I"
M17565	HLA-DQB1	211654_x_at	0.767558615	2.831732969	0.0138926	"major histocompatibility complex, class II, DQ beta 1 /// major histocompatibility complex, class II, DQ beta 1"
AF112857	CCNE2	211814_s_at	0.790999501	2.831732969	0.0190166	cyclin E2
L08961	MERTK	211913_s_at	1.297162623	2.831732969	0.010088	c-mer proto-oncogene tyrosine kinase /// c-mer proto-oncogene tyrosine kinase
AB011126	FNBP1	212288_at	1.273526725	2.831732969	0.01856	formin binding protein 1
AV725315	CLASP2	212309_at	1.25394014	2.831732969	0.0170775	cytoplasmic linker associated protein 2
M82882	ELF1	212418_at	1.236942057	2.831732969	0.0218245	E74-like factor 1 (ets domain transcription factor)
AI910895	---	213215_at	1.247638855	2.831732969	0.0179232	MRNA full length insert cDNA clone EUROIMAGE 42138
N33167	CDKN1C	213348_at	1.601748846	2.831732969	0.0358423	"Cyclin-dependent kinase inhibitor 1C (p57, Kip2)"
AB018322	TMCC1	213352_at	1.353306509	2.831732969	0.0150322	transmembrane and coiled-coil domain family 1
BF435376	DKFZP761N09121	213486_at	1.355500886	2.831732969	0.0161528	hypothetical protein DKFZp761N09121
AI811298	OSR2	213568_at	0.688318915	2.831732969	0.00625694	odd-skipped related 2 (Drosophila)
H11725	BHLHB9	213709_at	1.30720105	2.831732969	0.0209861	"basic helix-loop-helix domain containing, class B, 9"
AI017564	WDR67	214061_at	0.786852104	2.831732969	0.0113074	WD repeat domain 67
AK022131	TXNL2	214205_x_at	0.813173459	2.831732969	0.0113549	thioredoxin-like 2
AI339541	JUND	214326_x_at	1.248421171	2.831732969	0.0315177	jun D proto-oncogene
AU149447	ZNF200	214706_at	1.280469056	2.831732969	0.0179111	zinc finger protein 200
AK022892	ZBED4	214747_at	1.375539798	2.831732969	0.0132105	"Zinc finger, BED-type containing 4"
AJ006701	BRSK2	215010_s_at	1.926024781	2.831732969	0.00550321	BR serine/threonine kinase 2
AA351360	PTDSR	215233_at	1.464857277	2.831732969	0.0157684	phosphatidylserine receptor
AK025348	THRAP2	216109_at	1.511608708	2.831732969	0.0140823	Thyroid hormone receptor associated protein 2
AF113008	---	216247_at	1.723733914	2.831732969	0.016947	"CDNA FLJ37333 fis, clone BRAMY2020106"
X79683	LAMB2	216264_s_at	1.227575164	2.831732969	0.0186734	"laminin, beta 2 (laminin S)"
X03348	NR3C1	216321_s_at	1.416252995	2.831732969	0.0152917	"nuclear receptor subfamily 3, group C, member 1 (glucocorticoid receptor)"
AW408767	P18SRP	217608_at	1.356372795	2.831732969	0.0129229	p18 splicing regulatory protein
NM_025072	PTGES2	218083_at	0.733464147	2.831732969	0.0142448	prostaglandin E synthase 2
NM_022074	FLJ22794	218248_at	1.520774711	2.831732969	0.0311081	FLJ22794 protein
AW589982	NUP50	218293_x_at	1.489485253	2.831732969	0.0088866	nucleoporin 50kDa
NM_016328	GTF2IRD1	218412_s_at	1.213562074	2.831732969	0.0237874	GTF2I repeat domain containing 1
BC002585	RAB7L1	218700_s_at	1.246795382	2.831732969	0.0165687	"RAB7, member RAS oncogene family-like 1"
NM_022770	FLJ13912	218719_s_at	0.799744864	2.831732969	0.0174233	hypothetical protein FLJ13912
NM_004422	DVL2	218759_at	1.267444725	2.831732969	0.0187476	"dishevelled, dsh homolog 2 (Drosophila)"
NM_006548	IMP-2	218847_at	1.508663574	2.831732969	0.0179855	IGF-II mRNA-binding protein 2
NM_020379	MAN1C1	218918_at	1.312152902	2.831732969	0.0218823	"mannosidase, alpha, class 1C, member 1"
NM_020193	C11orf30	219012_s_at	0.69240674	2.831732969	0.00662911	chromosome 11 open reading frame 30
NM_021823	PPCDC	219066_at	0.775588556	2.831732969	0.0101055	phosphopantothenoylcysteine decarboxylase
NM_001422	ELF5	220624_s_at	0.763100958	2.831732969	0.00766582	E74-like factor 5 (ets domain transcription factor)
NM_013440	PILRB	220954_s_at	1.200728298	2.831732969	0.0182796	paired immunoglobin-like type 2 receptor beta
NM_020639	RIPK4	221215_s_at	1.289343946	2.831732969	0.0193914	receptor-interacting serine-threonine kinase 4
NM_006792	MORF4L1 /// MORF4	221381_s_at	0.77219964	2.831732969	0.0131884	mortality factor 4 like 1 /// mortality factor 4
AB044548	EIF4EBP1	221539_at	0.82389868	2.831732969	0.0195685	eukaryotic translation initiation factor 4E binding protein 1
BC000794	PRPF18	221547_at	0.772127636	2.831732969	0.0167437	PRP18 pre-mRNA processing factor 18 homolog (yeast)
AF288571	LEF1	221558_s_at	1.316873616	2.831732969	0.0212075	lymphoid enhancer-binding factor 1
BC005004	FAM64A	221591_s_at	0.711341071	2.831732969	0.0174176	"family with sequence similarity 64, member A"
BC001663	RPL31	221593_s_at	1.202644132	2.831732969	0.0270727	ribosomal protein L31
BC000535	PPAN	221649_s_at	0.702570179	2.831732969	0.0123872	peter pan homolog (Drosophila)
NM_004251	RAB9A	221808_at	1.206477694	2.831732969	0.0286804	"RAB9A, member RAS oncogene family"
AW444969	DKFZp761I2123	221924_at	1.414719191	2.831732969	0.0203224	hypothetical protein DKFZp761I2123
AW086021	ZNF323	222016_s_at	1.509289249	2.831732969	0.0150423	zinc finger protein 323
U80764	NSUN6	222128_at	1.414955416	2.831732969	0.0178571	"NOL1/NOP2/Sun domain family, member 6"
AK024175	---	222152_at	1.299888068	2.831732969	0.0122256	Similar to Microneme antigen
AK023133	MYEF2	222153_at	1.466931952	2.831732969	0.0060461	myelin expression factor 2
AL390153	MBD3 /// FLJ25976	222183_x_at	1.233248971	2.831732969	0.0223875	Methyl-CpG binding domain protein 3 /// Hypothetical protein FLJ25976
L08835	DMPK	37996_s_at	1.302152127	2.831732969	0.0145197	dystrophia myotonica-protein kinase
AB014555	HIP1R	38340_at	1.258038431	2.831732969	0.0269992	huntingtin interacting protein-1-related
AI421812	FLJ13912	45633_at	0.79641976	2.831732969	0.0149549	hypothetical protein FLJ13912
AI743990	PAOX	50400_at	0.679254194	2.831732969	0.0088006	polyamine oxidase (exo-N4-amino)
BF739979	FLJ16518	200979_at	1.253252987	3.441045145	0.0321384	Mitogen-activated protein kinase kinase kinase 15
NM_004772	C5orf13	201310_s_at	1.247704523	3.441045145	0.0278473	chromosome 5 open reading frame 13
NM_006435	IFITM2	201315_x_at	0.807020528	3.441045145	0.0141856	interferon induced transmembrane protein 2 (1-8D)
NM_007184	NISCH	201591_s_at	1.247047264	3.441045145	0.0275963	nischarin
NM_006739	MCM5	201755_at	0.755666484	3.441045145	0.0162662	"MCM5 minichromosome maintenance deficient 5, cell division cycle 46 (S. cerevisiae)"
NM_005915	MCM6	201930_at	0.809861125	3.441045145	0.0172263	"MCM6 minichromosome maintenance deficient 6 (MIS5 homolog, S. pombe) (S. cerevisiae)"
NM_002490	NDUFA6	202001_s_at	0.832958735	3.441045145	0.0167926	"NADH dehydrogenase (ubiquinone) 1 alpha subcomplex, 6, 14kDa"
NM_014330	PPP1R15A	202014_at	1.349347696	3.441045145	0.0329419	"protein phosphatase 1, regulatory (inhibitor) subunit 15A"
NM_003258	TK1	202338_at	0.653853113	3.441045145	0.0187841	"thymidine kinase 1, soluble"
NM_000017	ACADS	202366_at	0.73755549	3.441045145	0.0168562	"acyl-Coenzyme A dehydrogenase, C-2 to C-3 short chain"
AW291398	NFX1	202584_at	0.792878216	3.441045145	0.0164887	"nuclear transcription factor, X-box binding 1"
AI631140	MECP2	202616_s_at	1.403547088	3.441045145	0.0188175	methyl CpG binding protein 2 (Rett syndrome)
AU153477	LSM5	202903_at	0.779507824	3.441045145	0.015283	"LSM5 homolog, U6 small nuclear RNA associated (S. cerevisiae)"
NM_015703	CGI-96 /// dJ222E13.2	202938_x_at	1.247332927	3.441045145	0.0219961	CGI-96 protein /// similar to CGI-96
NM_002844	PTPRK	203038_at	1.2674816	3.441045145	0.0417419	"protein tyrosine phosphatase, receptor type, K"
NM_002970	SAT	203455_s_at	0.723692182	3.441045145	0.0198792	spermidine/spermine N1-acetyltransferase
BG034328	TFDP2	203588_s_at	0.770771905	3.441045145	0.01379	transcription factor Dp-2 (E2F dimerization partner 2)
N54448	HRSP12	203790_s_at	1.204402012	3.441045145	0.0249515	heat-responsive protein 12
NM_005940	MMP11	203878_s_at	1.314328722	3.441045145	0.0170143	matrix metallopeptidase 11 (stromelysin 3)
NM_014746	RNF144	204040_at	1.402923862	3.441045145	0.0198326	ring finger protein 144
NM_005930	CTAGE5	204055_s_at	1.249159346	3.441045145	0.0128424	"CTAGE family, member 5"
NM_005044	PRKX /// PRKY	204060_s_at	1.366365284	3.441045145	0.0269266	"protein kinase, X-linked /// protein kinase, Y-linked"
BF055171	ACOX3	204241_at	1.465816324	3.441045145	0.0190685	"acyl-Coenzyme A oxidase 3, pristanoyl"
NM_004203	PKMYT1	204267_x_at	0.751419423	3.441045145	0.0213333	"protein kinase, membrane associated tyrosine/threonine 1"
NM_000345	SNCA	204467_s_at	2.152200809	3.441045145	0.0246108	"synuclein, alpha (non A4 component of amyloid precursor) /// synuclein, alpha (non A4 component of amyloid precursor)"
NM_014732	KIAA0513	204546_at	1.399866348	3.441045145	0.0157443	KIAA0513
NM_006602	TCFL5	204849_at	1.210447141	3.441045145	0.0290391	transcription factor-like 5 (basic helix-loop-helix)
NM_005341	HKR3	205025_at	1.217783169	3.441045145	0.0218296	GLI-Kruppel family member HKR3
NM_015320	ARHGEF4	205109_s_at	1.347780726	3.441045145	0.0140214	Rho guanine nucleotide exchange factor (GEF) 4
NM_002606	PDE9A	205593_s_at	1.282115318	3.441045145	0.0290731	phosphodiesterase 9A
NM_007098	CLTCL1	205944_s_at	1.329810768	3.441045145	0.0197173	"clathrin, heavy polypeptide-like 1"
NM_002312	LIG4	206235_at	1.51054622	3.441045145	0.019623	"ligase IV, DNA, ATP-dependent"
NM_018138	FLJ10560	206451_at	0.821911545	3.441045145	0.0117675	hypothetical protein FLJ10560
NM_017644	KLHL24	206551_x_at	1.250520697	3.441045145	0.0299985	kelch-like 24 (Drosophila)
NM_006605	RFPL2	207227_x_at	1.621328848	3.441045145	0.0253238	ret finger protein-like 2
NM_000761	CYP1A2	207608_x_at	0.654798793	3.441045145	0.0235139	"cytochrome P450, family 1, subfamily A, polypeptide 2"
NM_006501	MOBP	207659_s_at	2.766944717	3.441045145	0.00501136	myelin-associated oligodendrocyte basic protein
NM_031206	LAS1L	208117_s_at	0.828820756	3.441045145	0.0178934	LAS1-like (S. cerevisiae) /// LAS1-like (S. cerevisiae)
NM_014005	PCDHA9	208205_at	1.217341676	3.441045145	0.0113729	protocadherin alpha 9
AF342815	LGALS8	208934_s_at	0.827215423	3.441045145	0.0176693	"lectin, galactoside-binding, soluble, 8 (galectin 8)"
AL080089	ATP5G1	208972_s_at	0.81870583	3.441045145	0.0192539	"ATP synthase, H+ transporting, mitochondrial F0 complex, subunit c (subunit 9), isoform 1"
AA634272	STAT3	208991_at	1.217711633	3.441045145	0.0226557	signal transducer and activator of transcription 3 (acute-phase response factor)
AF279899	PNRC1	209034_at	1.256336836	3.441045145	0.0327976	proline-rich nuclear receptor coactivator 1
BC002873	DKFZP564J0123	209177_at	0.808527977	3.441045145	0.017803	nuclear protein E3-3
BE966922	STX3A	209238_at	1.255653651	3.441045145	0.0284839	syntaxin 3A
AU153366	IKBKB	209341_s_at	1.274579812	3.441045145	0.0243357	"inhibitor of kappa light polypeptide gene enhancer in B-cells, kinase beta"
AW008018	GGA3	209411_s_at	1.258192341	3.441045145	0.0210188	"golgi associated, gamma adaptin ear containing, ARF binding protein 3"
AF098951	ABCG2	209735_at	0.661192729	3.441045145	0.00924623	"ATP-binding cassette, sub-family G (WHITE), member 2"
AF118073	PRDX3	209766_at	1.263555492	3.441045145	0.00741169	peroxiredoxin 3
AF225981	ATP2C1	209934_s_at	1.201076733	3.441045145	0.0169652	"ATPase, Ca++ transporting, type 2C, member 1"
D32051	GART	210005_at	0.777594728	3.441045145	0.0097878	"phosphoribosylglycinamide formyltransferase, phosphoribosylglycinamide synthetase, phosphoribosylaminoimidazole synthetase"
AF089087	GPR35	210264_at	1.314060857	3.441045145	0.0288047	G protein-coupled receptor 35
AB041834	PQBP1	210499_s_at	1.505068148	3.441045145	0.0122524	polyglutamine binding protein 1
BC000277	RICS	210791_s_at	1.395336074	3.441045145	0.0334418	Rho GTPase-activating protein
U84744	LYST	210943_s_at	1.255433099	3.441045145	0.0125139	lysosomal trafficking regulator
U66065	GRB10	210999_s_at	1.250333177	3.441045145	0.0259086	growth factor receptor-bound protein 10
BG505670	HNRPA3	211931_s_at	0.825976872	3.441045145	0.0151361	heterogeneous nuclear ribonucleoprotein A3
AA715041	MLL	212079_s_at	1.216723652	3.441045145	0.0274688	"myeloid/lymphoid or mixed-lineage leukemia (trithorax homolog, Drosophila)"
BF670447	RHOQ	212119_at	1.218336303	3.441045145	0.0213411	"ras homolog gene family, member Q"
AW470003	KIAA0143	212149_at	1.214010595	3.441045145	0.0344177	KIAA0143 protein
H95344	VEGF	212171_x_at	1.258332055	3.441045145	0.0231288	vascular endothelial growth factor
AA181179	CAMKK2	212252_at	1.306252778	3.441045145	0.0257267	"calcium/calmodulin-dependent protein kinase kinase 2, beta"
N31807	KIAA0934	212504_at	1.204472433	3.441045145	0.025729	KIAA0934
BE302191	STK38L	212565_at	1.294271749	3.441045145	0.0194486	serine/threonine kinase 38 like
BF217861	MT1E	212859_x_at	0.320261597	3.441045145	0.0164528	metallothionein 1E (functional)
AK024828	C6orf145	212923_s_at	1.211251012	3.441045145	0.0187939	chromosome 6 open reading frame 145
AU158490	LOC153561	213089_at	1.209284304	3.441045145	0.0332479	hypothetical protein LOC153561
AI052536	SNX1	213364_s_at	1.297211191	3.441045145	0.0232387	sorting nexin 1
AA029811	LOC126208	213402_at	0.730129442	3.441045145	0.0070867	hypothetical protein LOC126208
AU155515	RPL37A	213459_at	1.241991063	3.441045145	0.0226924	ribosomal protein L37a
BF671400	PDLIM5	213684_s_at	0.689404368	3.441045145	0.000618694	PDZ and LIM domain 5
AI393937	HSF1	213756_s_at	1.288747294	3.441045145	0.0265458	heat shock transcription factor 1
BE326952	GGCX	214005_at	0.77524445	3.441045145	0.0211562	gamma-glutamyl carboxylase
AL049764	SLC25A17	214210_at	0.784003981	3.441045145	0.00785538	"solute carrier family 25 (mitochondrial carrier; peroxisomal membrane protein, 34kDa), member 17"
AI744626	KIAA0564	214231_s_at	0.784827181	3.441045145	0.0138467	KIAA0564 protein
BF062223	CHAF1A	214426_x_at	0.824655059	3.441045145	0.0157479	"chromatin assembly factor 1, subunit A (p150)"
AK024279	WIPI-2	214699_x_at	1.282369936	3.441045145	0.0236104	WIPI49-like protein 2
X06989	APP	214953_s_at	1.34811666	3.441045145	0.0359917	"amyloid beta (A4) precursor protein (peptidase nexin-II, Alzheimer disease)"
AF070642	LOC253982	214993_at	1.325722942	3.441045145	0.0178847	hypothetical protein LOC253982
AL512707	DDX27	215693_x_at	0.832788447	3.441045145	0.015346	DEAD (Asp-Glu-Ala-Asp) box polypeptide 27
X14174	ALPL	215783_s_at	1.332144236	3.441045145	0.0344185	"alkaline phosphatase, liver/bone/kidney"
NM_006395	ATG7	218673_s_at	0.766210027	3.441045145	0.012154	ATG7 autophagy related 7 homolog (S. cerevisiae)
NM_018231	FLJ10815	218727_at	1.333631147	3.441045145	0.0259308	amino acid transporter
NM_018053	XKR8	218753_at	1.27335692	3.441045145	0.0239001	"X Kell blood group precursor-related family, member 8"
NM_019857	CTPS2	219080_s_at	0.824240663	3.441045145	0.0114417	CTP synthase II
NM_018492	PBK	219148_at	0.78541747	3.441045145	0.0190432	PDZ binding kinase
NM_018530	GSDML	219233_s_at	1.496495502	3.441045145	0.0167792	gasdermin-like
NM_020213	PARP6	219639_x_at	1.355179291	3.441045145	0.01935	"poly (ADP-ribose) polymerase family, member 6"
NM_017600	DKFZp434M0331	219876_s_at	1.299249767	3.441045145	0.0192644	hypothetical protein DKFZp434M0331
NM_024037	C1orf135	220011_at	0.803819171	3.441045145	0.0135622	chromosome 1 open reading frame 135
NM_030900	TBRG4	220961_s_at	1.424152529	3.441045145	0.00983349	transforming growth factor beta regulator 4 /// transforming growth factor beta regulator 4
BC002903	TREX1	221642_at	1.493129572	3.441045145	0.0184271	three prime repair exonuclease 1
AA195017	KIAA1609	221843_s_at	1.329722172	3.441045145	0.0194491	KIAA1609 protein
AI560951	MRPL52	221997_s_at	0.631623803	3.441045145	0.00474338	Mitochondrial ribosomal protein L52
AW025529	CALML4	64408_s_at	1.234052657	3.441045145	0.0295461	calmodulin-like 4
AI761771	CHD4	201182_s_at	0.778383883	4.212362957	0.0246511	chromodomain helicase DNA binding protein 4
NM_000178	GSS	201415_at	0.808147533	4.212362957	0.019886	glutathione synthetase
NM_000903	NQO1	201468_s_at	0.813688786	4.212362957	0.0251714	"NAD(P)H dehydrogenase, quinone 1"
H42875	DGCR2	202099_s_at	1.207489356	4.212362957	0.022284	DiGeorge syndrome critical region gene 2
NM_003119	SPG7	202104_s_at	1.255928797	4.212362957	0.0311774	"spastic paraplegia 7, paraplegin (pure and complicated autosomal recessive)"
L19760	SNAP25	202507_s_at	1.290715983	4.212362957	0.0271734	"synaptosomal-associated protein, 25kDa"
AA046411	APPBP2	202630_at	1.269334746	4.212362957	0.0287014	amyloid beta precursor protein (cytoplasmic tail) binding protein 2
NM_014678	SAPS2	202792_s_at	1.259085418	4.212362957	0.036936	"SAPS domain family, member 2"
AL022316	CGI-96	202937_x_at	0.749381009	4.212362957	0.0232927	CGI-96 protein
NM_000255	MUT	202960_s_at	1.205597629	4.212362957	0.0542487	methylmalonyl Coenzyme A mutase
NM_014849	SV2A	203069_at	1.242425728	4.212362957	0.0283953	synaptic vesicle glycoprotein 2A
BF059313	KIF5C	203129_s_at	1.548951523	4.212362957	0.0317618	kinesin family member 5C
NM_005689	ABCB6	203192_at	0.809369779	4.212362957	0.0370991	"ATP-binding cassette, sub-family B (MDR/TAP), member 6"
NM_002254	KIF3C	203390_s_at	1.256239546	4.212362957	0.0261321	kinesin family member 3C
NM_002971	SATB1	203408_s_at	1.70226233	4.212362957	0.0481284	special AT-rich sequence binding protein 1 (binds to nuclear matrix/scaffold-associating DNA's)
NM_014763	MRPL19	203465_at	0.790895408	4.212362957	0.0161613	mitochondrial ribosomal protein L19
NM_004219	PTTG1	203554_x_at	0.811995128	4.212362957	0.0227377	pituitary tumor-transforming 1
NM_003878	GGH	203560_at	0.809057155	4.212362957	0.0240316	"gamma-glutamyl hydrolase (conjugase, folylpolygammaglutamyl hydrolase)"
D84476	MAP3K5	203836_s_at	1.214116929	4.212362957	0.0307287	mitogen-activated protein kinase kinase kinase 5
NM_000282	PCCA	203860_at	1.271647088	4.212362957	0.0289401	"propionyl Coenzyme A carboxylase, alpha polypeptide"
NM_014870	ZBTB40	203959_s_at	1.328489615	4.212362957	0.02667	zinc finger and BTB domain containing 40
NM_005483	CHAF1A	203976_s_at	0.82373324	4.212362957	0.0188702	"chromatin assembly factor 1, subunit A (p150)"
AA044154	KIAA0999	204155_s_at	1.209328106	4.212362957	0.025611	KIAA0999 protein
NM_002800	PSMB9	204279_at	0.689666388	4.212362957	0.00943599	"proteasome (prosome, macropain) subunit, beta type, 9 (large multifunctional peptidase 2)"
NM_002317	LOX	204298_s_at	0.717378547	4.212362957	0.0137399	lysyl oxidase
BE535746	C2orf23	204364_s_at	1.568065714	4.212362957	0.0376923	chromosome 2 open reading frame 23
NM_013255	MKLN1	204423_at	0.708983854	4.212362957	0.0198226	"muskelin 1, intracellular mediator containing kelch motifs"
NM_014577	BRD1	204520_x_at	1.240914741	4.212362957	0.0351347	bromodomain containing 1
NM_004856	KIF23	204709_s_at	0.784267844	4.212362957	0.0306212	kinesin family member 23
NM_015918	POP5	204839_at	0.821331446	4.212362957	0.0330485	"processing of precursor 5, ribonuclease P/MRP subunit (S. cerevisiae)"
NM_002162	ICAM3	204949_at	0.786406994	4.212362957	0.0331959	intercellular adhesion molecule 3
NM_001407	CELSR3	205165_at	1.201702518	4.212362957	0.0487204	"cadherin, EGF LAG seven-pass G-type receptor 3 (flamingo homolog, Drosophila)"
NM_000826	GRIA2	205358_at	1.61626877	4.212362957	0.0417311	"glutamate receptor, ionotropic, AMPA 2"
NM_021111	RECK	205407_at	1.690728311	4.212362957	0.0125682	reversion-inducing-cysteine-rich protein with kazal motifs
NM_014906	PPM1E	205938_at	1.227166174	4.212362957	0.0312726	protein phosphatase 1E (PP2C domain containing)
NM_004402	DFFB	206752_s_at	1.211692163	4.212362957	0.0255324	"DNA fragmentation factor, 40kDa, beta polypeptide (caspase-activated DNase)"
NM_015384	NIPBL	207108_s_at	1.210621414	4.212362957	0.0382307	Nipped-B homolog (Drosophila)
U84246	NEU1	208926_at	1.637735714	4.212362957	0.053366	sialidase 1 (lysosomal sialidase)
AF098865	SQLE	209218_at	1.260129491	4.212362957	0.0357813	squalene epoxidase
D86962	GRB10	209409_at	1.388063425	4.212362957	0.0339928	growth factor receptor-bound protein 10
AF081583	PLEKHB1	209504_s_at	1.337504911	4.212362957	0.0402844	"pleckstrin homology domain containing, family B (evectins) member 1"
U96721	HPS1	210112_at	0.708705889	4.212362957	0.016642	Hermansky-Pudlak syndrome 1
AB026730	B3GALT4	210205_at	0.80140868	4.212362957	0.0125531	"UDP-Gal:betaGlcNAc beta 1,3-galactosyltransferase, polypeptide 4"
L37882	FZD2	210220_at	1.64336125	4.212362957	0.0221146	frizzled homolog 2 (Drosophila)
U71088	MAP2K5	211370_s_at	1.236957797	4.212362957	0.0256412	mitogen-activated protein kinase kinase 5
L36674	SNCA	211546_x_at	1.364731076	4.212362957	0.0354404	"synuclein, alpha (non A4 component of amyloid precursor)"
BC005938	LSM5	211747_s_at	0.829811012	4.212362957	0.0248725	"LSM5 homolog, U6 small nuclear RNA associated (S. cerevisiae) /// LSM5 homolog, U6 small nuclear RNA associated (S. cerevisiae)"
BC005995	SLD5	211767_at	0.669932223	4.212362957	0.025985	SLD5 homolog /// SLD5 homolog
AV714029	LOC143941	212080_at	1.213546266	4.212362957	0.0342085	Similar to CDNA sequence BC021608
AK025580	C14orf111 /// C14orf32	212499_s_at	0.81471239	4.212362957	0.0171795	chromosome 14 open reading frame 111 /// chromosome 14 open reading frame 32
BF968134	MXRA7	212509_s_at	1.467019672	4.212362957	0.0355158	matrix-remodelling associated 7
AA760862	H2AFX	212525_s_at	0.788641706	4.212362957	0.0301617	"H2A histone family, member X"
BE222801	SCAMP5	212699_at	1.251890889	4.212362957	0.0263389	secretory carrier membrane protein 5
AA126789	KIAA0470	212746_s_at	1.350932746	4.212362957	0.0277088	KIAA0470
AI358867	APOE	212884_x_at	1.495611723	4.212362957	0.032839	Apolipoprotein E
AA910371	CALR	212952_at	0.830152889	4.212362957	0.021518	Calreticulin
W74442	FLJ10719	213007_at	0.824419431	4.212362957	0.0234236	hypothetical protein FLJ10719
AW593996	"MAR3	213256_at	1.400967487	4.212362957	0.0169274	membrane-associated ring finger (C3HC4) 3
NM_015714	G0S2	213524_s_at	1.214701244	4.212362957	0.0175098	G0/G1switch 2
AI859060	MINK1	214246_x_at	1.349126449	4.212362957	0.0313076	misshapen-like kinase 1 (zebrafish)
BE675449	CDC2L5	214287_s_at	1.541866556	4.212362957	0.0202088	Cell division cycle 2-like 5 (cholinesterase-related cell division controller)
AL117451	---	215029_at	1.356817309	4.212362957	0.0206425	---
BF697247	SAMD4	215120_s_at	1.611672388	4.212362957	0.0142766	sterile alpha motif domain containing 4
AI821657	---	215421_at	1.730981668	4.212362957	0.0138483	Clone 23636 mRNA sequence
AK023029	PHC3	215521_at	1.449082467	4.212362957	0.0346156	polyhomeotic like 3 (Drosophila)
AK024173	PPP3CB	215586_at	1.589134523	4.212362957	0.00375422	"Protein phosphatase 3 (formerly 2B), catalytic subunit, beta isoform (calcineurin A beta)"
AK024958	RIOK3	215588_x_at	1.255516518	4.212362957	0.0262259	RIO kinase 3 (yeast)
AK024938	EEF1G	215866_at	1.418048634	4.212362957	0.0241611	Eukaryotic translation elongation factor 1 gamma
AL049980	DKFZP564C152	216028_at	1.283941659	4.212362957	0.0361092	DKFZP564C152 protein
AC005339	C19orf10	216483_s_at	0.814167497	4.212362957	0.0387527	chromosome 19 open reading frame 10
AL049646	ZNF133	216960_s_at	1.228885625	4.212362957	0.0260703	zinc finger protein 133 (clone pHZ-13)
H49382	---	217506_at	1.233969031	4.212362957	0.0125096	Hypothetical gene supported by BC041875; BX648984
BE466926	RFX3	217671_at	1.53770266	4.212362957	0.0271623	"Regulatory factor X, 3 (influences HLA class II expression)"
AW503390	PRO0149	217682_at	0.770692585	4.212362957	0.00993706	PRO0149 protein
NM_016607	ARMCX3	217858_s_at	1.328551483	4.212362957	0.0302322	"armadillo repeat containing, X-linked 3"
NM_024595	C1orf108	217893_s_at	1.206722823	4.212362957	0.0276141	chromosome 1 open reading frame 108
NM_017882	CLN6	218161_s_at	0.738657513	4.212362957	0.0196319	"ceroid-lipofuscinosis, neuronal 6, late infantile, variant"
NM_017778	WHSC1L1	218173_s_at	1.240258044	4.212362957	0.0121411	Wolf-Hirschhorn syndrome candidate 1-like 1
NM_013399	C16orf5	218183_at	1.247874259	4.212362957	0.0265286	chromosome 16 open reading frame 5
NM_017931	FLJ20699	218272_at	1.23269498	4.212362957	0.0275253	hypothetical protein FLJ20699
NM_015400	SMAD3	218284_at	1.270544364	4.212362957	0.0296966	"SMAD, mothers against DPP homolog 3 (Drosophila)"
NM_018019	MED9	218372_at	1.212043106	4.212362957	0.0295703	"mediator of RNA polymerase II transcription, subunit 9 homolog (yeast)"
NM_018077	RBM28	218593_at	0.825815093	4.212362957	0.0230887	RNA binding motif protein 28
NM_018357	LARP6	218651_s_at	1.466579085	4.212362957	0.0391043	"La ribonucleoprotein domain family, member 6"
NM_015533	DAK	218688_at	0.78499138	4.212362957	0.0219697	dihydroxyacetone kinase 2 homolog (yeast)
NM_022777	RABL5	218785_s_at	1.336075861	4.212362957	0.0182691	"RAB, member RAS oncogene family-like 5"
NM_018215	FLJ10781	218824_at	1.243826707	4.212362957	0.0348042	hypothetical protein FLJ10781
NM_030577	MGC10993	218897_at	0.806491334	4.212362957	0.0152019	hypothetical protein MGC10993
NM_023078	PYCRL	218944_at	0.709690733	4.212362957	0.0241961	pyrroline-5-carboxylate reductase-like
NM_024042	METRN	219051_x_at	0.652517226	4.212362957	0.0218648	"meteorin, glial cell differentiation regulator"
NM_017745	BCOR	219433_at	0.810536989	4.212362957	0.0185155	BCL6 co-repressor
NM_024820	DENND1A	219763_at	0.528342045	4.212362957	0.0112306	DENN/MADD domain containing 1A
NM_021971	GMPPB	219920_s_at	0.674262704	4.212362957	0.0233761	GDP-mannose pyrophosphorylase B
NM_024969	TAIP-2	220462_at	1.620077499	4.212362957	0.0146559	TGF-beta induced apotosis protein 2
NM_017566	KLHDC4	221219_s_at	0.807868181	4.212362957	0.0157713	kelch domain containing 4
NM_016473	MUM1	221290_s_at	1.379559006	4.212362957	0.0361061	melanoma associated antigen (mutated) 1
NM_023921	TAS2R10	221397_at	1.509115692	4.212362957	0.00956955	"taste receptor, type 2, member 10"
BC000596	RPL23AP7	221634_at	1.545758418	4.212362957	0.0290631	ribosomal protein L23a pseudogene 7
AI138993	PPP2R2D	221772_s_at	1.294864134	4.212362957	0.0259401	"protein phosphatase 2, regulatory subunit B, delta isoform"
BF437591	---	222026_at	1.344685339	4.212362957	0.0312689	Transcribed locus
AW975638	HK2	222305_at	4.009914515	4.212362957	0.0339277	hexokinase 2
AB002342	WNK1	39313_at	1.243159464	4.212362957	0.014949	WNK lysine deficient protein kinase 1
AF059274	CSPG5	39966_at	1.23684314	4.212362957	0.0374744	chondroitin sulfate proteoglycan 5 (neuroglycan C)
AI970898	ACACB	43427_at	1.220225741	4.212362957	0.0179522	acetyl-Coenzyme A carboxylase beta
AW026481	KCTD13	45653_at	1.262239087	4.212362957	0.0323297	potassium channel tetramerisation domain containing 13
AI963454	FLJ10815	56821_at	1.329246847	4.212362957	0.0393863	amino acid transporter
AI978718	SFRS14	64371_at	1.325223852	4.212362957	0.0175502	"splicing factor, arginine/serine-rich 14"
NM_000484	APP	200602_at	1.410381824	5.04335772	0.0341744	"amyloid beta (A4) precursor protein (peptidase nexin-II, Alzheimer disease)"
NM_002626	PFKL	201102_s_at	0.830724421	5.04335772	0.0294021	"phosphofructokinase, liver"
NM_002228	JUN	201466_s_at	1.329506377	5.04335772	0.0416316	v-jun sarcoma virus 17 oncogene homolog (avian)
W02593	JARID1B	201548_s_at	1.385601915	5.04335772	0.0460557	"Jumonji, AT rich interactive domain 1B (RBP2-like)"
NM_000127	EXT1	201995_at	1.307320291	5.04335772	0.0242325	exostoses (multiple) 1
NM_007317	KIF22	202183_s_at	0.790308816	5.04335772	0.0261925	kinesin family member 22
NM_000709	BCKDHA	202331_at	0.827837954	5.04335772	0.0223254	"branched chain keto acid dehydrogenase E1, alpha polypeptide (maple syrup urine disease)"
NM_006254	PRKCD	202545_at	0.800264754	5.04335772	0.0274966	"protein kinase C, delta"
AI963873	ITPR2	202661_at	1.382934007	5.04335772	0.0316876	"inositol 1,4,5-triphosphate receptor, type 2"
NM_000346	SOX9	202936_s_at	0.810544139	5.04335772	0.0309821	"SRY (sex determining region Y)-box 9 (campomelic dysplasia, autosomal sex-reversal)"
BE962483	TRIM14	203147_s_at	0.827163086	5.04335772	0.0223395	tripartite motif-containing 14
NM_014905	GLS	203159_at	1.28996749	5.04335772	0.036747	glutaminase
NM_004431	EPHA2	203499_at	1.259003044	5.04335772	0.0393321	EPH receptor A2
NM_006355	TRIM38	203568_s_at	1.31765945	5.04335772	0.0320956	tripartite motif-containing 38
NM_014904	RAB11FIP2	203884_s_at	1.371357793	5.04335772	0.043647	RAB11 family interacting protein 2 (class I)
NM_006493	CLN5	204085_s_at	1.274676264	5.04335772	0.0434666	"ceroid-lipofuscinosis, neuronal 5"
NM_000096	CP	204846_at	2.579006462	5.04335772	0.0468927	ceruloplasmin (ferroxidase)
NM_002359	MAFG	204970_s_at	1.294650491	5.04335772	0.0525608	v-maf musculoaponeurotic fibrosarcoma oncogene homolog G (avian)
NM_004702	CCNE2	205034_at	0.76033434	5.04335772	0.0254803	cyclin E2
NM_001283	AP1S1	205195_at	0.800394195	5.04335772	0.0228416	"adaptor-related protein complex 1, sigma 1 subunit"
NM_025257	SLC44A4	205597_at	1.326355484	5.04335772	0.0481254	"solute carrier family 44, member 4"
AI051254	TRPM2	205708_s_at	0.832483578	5.04335772	0.0196035	"transient receptor potential cation channel, subfamily M, member 2"
NM_006300	ZNF230	205791_x_at	1.310958818	5.04335772	0.023699	zinc finger protein 230
AI770098	PART1	205833_s_at	0.775263055	5.04335772	0.022117	prostate androgen-regulated transcript 1
NM_004476	FOLH1	205860_x_at	1.324228469	5.04335772	0.0529617	folate hydrolase (prostate-specific membrane antigen) 1
BC005035	RAB3B	205924_at	1.287748361	5.04335772	0.0429621	"RAB3B, member RAS oncogene family"
NM_000111	SLC26A3	206143_at	3.1275653	5.04335772	0.0582917	"solute carrier family 26, member 3"
NM_003454	ZNF200	207338_s_at	1.255316179	5.04335772	0.0346517	zinc finger protein 200
NM_003326	TNFSF4	207426_s_at	1.426268124	5.04335772	0.0155061	"tumor necrosis factor (ligand) superfamily, member 4 (tax-transcriptionally activated glycoprotein 1, 34kDa)"
NM_012346	NUP62	207740_s_at	1.200993152	5.04335772	0.0597868	nucleoporin 62kDa
NM_015437	---	207799_x_at	1.628870271	5.04335772	0.0147521	---
NM_030920	ANP32E	208103_s_at	0.779522703	5.04335772	0.0352362	"acidic (leucine-rich) nuclear phosphoprotein 32 family, member E /// acidic (leucine-rich) nuclear phosphoprotein 32 family, member E"
NM_006478	GAS2L1	208258_s_at	1.31583091	5.04335772	0.0241385	growth arrest-specific 2 like 1
BC002446	DNAJB6	209015_s_at	1.307741988	5.04335772	0.0361051	"DnaJ (Hsp40) homolog, subfamily B, member 6"
BC002511	CBR1	209213_at	1.23333078	5.04335772	0.0444499	carbonyl reductase 1
AF237813	ABAT	209460_at	1.439009695	5.04335772	0.0350461	4-aminobutyrate aminotransferase
M57399	PTN	209466_x_at	1.201819782	5.04335772	0.0339715	"pleiotrophin (heparin binding growth factor 8, neurite growth-promoting factor 1)"
BC005264	RPA3	209507_at	0.764273573	5.04335772	0.0334578	"replication protein A3, 14kDa"
AF047760	PPAP2C	209529_at	1.477804092	5.04335772	0.043357	phosphatidic acid phosphatase type 2C
L38969	THBS3	209561_at	1.327903626	5.04335772	0.0396828	thrombospondin 3
AI202969	OSBPL3	209626_s_at	0.739661153	5.04335772	0.020697	oxysterol binding protein-like 3
BG033764	MTF2	209705_at	1.255982272	5.04335772	0.0434812	metal response element binding transcription factor 2
J03241	TGFB3	209747_at	0.777613883	5.04335772	0.0157922	"transforming growth factor, beta 3"
BC002915	DLG5	210469_at	1.365597158	5.04335772	0.041142	"discs, large homolog 5 (Drosophila)"
BC001304	PCLO	210650_s_at	1.375879034	5.04335772	0.0329131	piccolo (presynaptic cytomatrix protein)
M33384	ARF3	211622_s_at	0.831655683	5.04335772	0.0236626	ADP-ribosylation factor 3 /// ADP-ribosylation factor 3
BC005956	RLN1	211753_s_at	1.742927537	5.04335772	0.0417338	relaxin 1 /// relaxin 1
BE614199	IHPK1	212439_at	1.219924457	5.04335772	0.0485711	inositol hexaphosphate kinase 1
AI149535	STAT5B	212550_at	1.272695238	5.04335772	0.0349818	signal transducer and activator of transcription 5B
AW873621	TLE3	212770_at	0.784946236	5.04335772	0.0267383	"transducin-like enhancer of split 3 (E(sp1) homolog, Drosophila)"
AI700633	---	212812_at	1.35042045	5.04335772	0.0575254	"CDNA: FLJ22642 fis, clone HSI06970"
AF035281	LOC155060	213367_at	1.400625185	5.04335772	0.030779	hypothetical protein LOC155060
N80918	CG018	213375_s_at	1.293487453	5.04335772	0.0260399	hypothetical gene CG018
BE138888	RAC2	213603_s_at	1.283225612	5.04335772	0.0574127	"ras-related C3 botulinum toxin substrate 2 (rho family, small GTP binding protein Rac2)"
AW069290	METTL3	213653_at	1.254188024	5.04335772	0.0336337	methyltransferase like 3
AA583336	LOC157562	213776_at	1.611303548	5.04335772	0.0408755	hypothetical protein LOC157562
AW188131	DDX17	213998_s_at	1.212745083	5.04335772	0.0407783	DEAD (Asp-Glu-Ala-Asp) box polypeptide 17
AI928127	SFRS14	214092_x_at	1.239747919	5.04335772	0.0396685	"splicing factor, arginine/serine-rich 14"
AL556409	GAL	214240_at	0.83080936	5.04335772	0.0208479	galanin
AL041139	JRK	214692_s_at	1.247760233	5.04335772	0.0354337	jerky homolog (mouse)
AK022632	UAP1L1	214755_at	1.38983122	5.04335772	0.0520591	UDP-N-acteylglucosamine pyrophosphorylase 1-like 1
X75940	LOC153561	214850_at	1.251646755	5.04335772	0.0311581	hypothetical protein LOC153561
AC002045	NPIP /// LOC339047 /// LOC440341	214870_x_at	1.241144595	5.04335772	0.043223	nuclear pore complex interacting protein /// hypothetical protein LOC339047 /// similar to hypothetical protein LOC339047
AW168915	FOLH1	215363_x_at	1.333980738	5.04335772	0.0509553	folate hydrolase (prostate-specific membrane antigen) 1
AK022170	---	215786_at	1.316854171	5.04335772	0.0246465	---
AV693216	PLXNB1	215807_s_at	1.339446334	5.04335772	0.0356262	plexin B1
AC006539	ZNF682	216468_s_at	1.24984188	5.04335772	0.0278848	zinc finger protein 682
X71347	TCF1	216930_at	1.553712188	5.04335772	0.0332734	"transcription factor 1, hepatic; LF-B1, hepatic nuclear factor (HNF1), albumin proximal factor"
AF254357	FOLH1	217487_x_at	1.315220567	5.04335772	0.0413286	folate hydrolase (prostate-specific membrane antigen) 1
BE930512	CPM	217542_at	1.324571614	5.04335772	0.0223802	Carboxypeptidase M
AA443771	FLJ22795	217643_x_at	1.3462964	5.04335772	0.01647	Hypothetical protein FLJ22795
NM_016337	EVL	217838_s_at	1.225317732	5.04335772	0.0309363	Enah/Vasp-like
NM_013245	VPS4A	217913_at	0.772123885	5.04335772	0.0349701	vacuolar protein sorting 4A (yeast)
NM_015665	AAAS	218075_at	0.771745687	5.04335772	0.0255718	"achalasia, adrenocortical insufficiency, alacrimia (Allgrove, triple-A)"
NM_017632	CARF	218929_at	1.295116438	5.04335772	0.0513621	collaborates/cooperates with ARF (alternate reading frame) protein
NM_016373	WWOX	219077_s_at	1.391771872	5.04335772	0.0294682	WW domain containing oxidoreductase
NM_016594	FKBP11	219118_at	1.222201114	5.04335772	0.0341417	"FK506 binding protein 11, 19 kDa"
NM_017753	PRG-3	219732_at	1.276304451	5.04335772	0.0263805	plasticity related gene 3
NM_017410	HOXC13	219832_s_at	1.357852273	5.04335772	0.0250218	homeo box C13
NM_018152	C20orf12	219951_s_at	1.321895622	5.04335772	0.0364833	chromosome 20 open reading frame 12
NM_017766	CASZ1	220015_at	0.750239514	5.04335772	0.0166868	"castor homolog 1, zinc finger (Drosophila)"
NM_024651	LOC202181	220609_at	1.519291606	5.04335772	0.0281023	hypothetical protein LOC202181
NM_025120	---	220728_at	1.324634809	5.04335772	0.0226604	---
NM_030575	MGC10334	220734_s_at	1.200766059	5.04335772	0.0320726	hypothetical protein MGC10334
NM_018502	PRO1580	221096_s_at	0.754925574	5.04335772	0.0197691	hypothetical protein PRO1580
NM_013333	EPN1	221141_x_at	1.314030772	5.04335772	0.024692	epsin 1
NM_003445	ZNF155	221201_s_at	1.347799437	5.04335772	0.0188774	zinc finger protein 155 (pHZ-96)
AU145941	CDC14B	221555_x_at	1.278042393	5.04335772	0.0301754	CDC14 cell division cycle 14 homolog B (S. cerevisiae)
M27877	ZNF83	221645_s_at	1.322308689	5.04335772	0.0393541	zinc finger protein 83 (HPF1)
BG035985	HMGCS1	221750_at	1.705595653	5.04335772	0.0557678	3-hydroxy-3-methylglutaryl-Coenzyme A synthase 1 (soluble)
AV700132	SIAH1	221834_at	1.228887119	5.04335772	0.0506548	Seven in absentia homolog 1 (Drosophila)
AI144007	HNRPA1	222040_at	1.246974111	5.04335772	0.0284962	heterogeneous nuclear ribonucleoprotein A1
AU147889	YES1	222180_at	1.515108648	5.04335772	0.0109013	V-yes-1 Yamaguchi sarcoma viral oncogene homolog 1
M76477	GM2A	35820_at	1.276588976	5.04335772	0.0250879	GM2 ganglioside activator
AL080214	HOM-TES-103	36030_at	1.259215439	5.04335772	0.0283534	HOM-TES-103 tumor antigen-like
AL120554	MARK4	55065_at	1.212703831	5.04335772	0.0384091	MAP/microtubule affinity-regulating kinase 4
AB034747	LITAF	200704_at	1.310105016	5.989020346	0.0540061	lipopolysaccharide-induced TNF factor
AL575509	ETS2	201328_at	1.301382948	5.989020346	0.0565303	v-ets erythroblastosis virus E26 oncogene homolog 2 (avian)
NM_000445	PLEC1	201373_at	1.252624581	5.989020346	0.0431671	"plectin 1, intermediate filament binding protein 500kDa"
NM_000690	ALDH2	201425_at	1.216359323	5.989020346	0.0533609	aldehyde dehydrogenase 2 family (mitochondrial)
NM_006111	ACAA2	202003_s_at	1.29327218	5.989020346	0.0575602	acetyl-Coenzyme A acyltransferase 2 (mitochondrial 3-oxoacyl-Coenzyme A thiolase)
NM_017458	MVP	202180_s_at	1.275341792	5.989020346	0.064088	major vault protein
AW084510	LSS	202245_at	1.380357685	5.989020346	0.0677944	"lanosterol synthase (2,3-oxidosqualene-lanosterol cyclase)"
NM_000296	PKD1	202328_s_at	1.287915792	5.989020346	0.0394062	polycystic kidney disease 1 (autosomal dominant)
NM_019081	LKAP	202386_s_at	1.207390988	5.989020346	0.056491	limkain b1
NM_014456	PDCD4	202730_s_at	0.783468165	5.989020346	0.0441953	programmed cell death 4 (neoplastic transformation inhibitor)
NM_001467	SLC37A4	202830_s_at	0.826762086	5.989020346	0.0421466	"solute carrier family 37 (glycerol-6-phosphate transporter), member 4"
NM_016391	HSPC111	203023_at	0.831119887	5.989020346	0.0273917	hypothetical protein HSPC111
NM_000041	APOE	203382_s_at	1.586233114	5.989020346	0.0382608	apolipoprotein E
NM_000159	GCDH	203500_at	0.817066413	5.989020346	0.0273288	glutaryl-Coenzyme A dehydrogenase
NM_002133	HMOX1	203665_at	1.294348211	5.989020346	0.0279474	heme oxygenase (decycling) 1
NM_001123	ADK	204120_s_at	0.61383015	5.989020346	0.0184576	adenosine kinase
NM_006747	SIPA1	204164_at	1.290769226	5.989020346	0.0540041	signal-induced proliferation-associated gene 1
NM_003931	WASF1	204165_at	1.22365015	5.989020346	0.0520057	"WAS protein family, member 1"
NM_005198	CHKB	204193_at	0.758037771	5.989020346	0.0301122	choline kinase beta
NM_014772	KIAA0427	204303_s_at	1.550689765	5.989020346	0.0343587	KIAA0427
NM_002689	POLA2	204441_s_at	0.77894665	5.989020346	0.0364056	"polymerase (DNA directed), alpha 2 (70kD subunit)"
AF074717	RAD1	204460_s_at	0.829006499	5.989020346	0.0386384	RAD1 homolog (S. pombe)
NM_007295	BRCA1	204531_s_at	0.825830732	5.989020346	0.0296848	"breast cancer 1, early onset"
AL109928	PPP1R3D	204554_at	0.829504308	5.989020346	0.0179647	"protein phosphatase 1, regulatory subunit 3D"
NM_000428	LTBP2	204682_at	1.385479434	5.989020346	0.0373697	latent transforming growth factor beta binding protein 2
NM_002452	NUDT1	204766_s_at	0.719279462	5.989020346	0.0280584	nudix (nucleoside diphosphate linked moiety X)-type motif 1
AA772093	NEURL	204888_s_at	0.748831592	5.989020346	0.0173314	neuralized-like (Drosophila)
NM_018844	BCAP29	205084_at	0.789515921	5.989020346	0.0429757	B-cell receptor-associated protein 29
NM_004153	ORC1L	205085_at	0.790274726	5.989020346	0.0268144	"origin recognition complex, subunit 1-like (yeast)"
NM_006207	PDGFRL	205226_at	1.211153245	5.989020346	0.0241784	platelet-derived growth factor receptor-like
AU151483	CDH6	205532_s_at	0.611671148	5.989020346	0.0164269	"cadherin 6, type 2, K-cadherin (fetal kidney)"
AI052747	HOXB5	205600_x_at	1.232669441	5.989020346	0.0374055	homeo box B5
NM_005084	PLA2G7	206214_at	0.699120693	5.989020346	0.0359067	"phospholipase A2, group VII (platelet-activating factor acetylhydrolase, plasma) /// phospholipase A2, group VII (platelet-activating factor acetylhydrolase, plasma)"
NM_001041	SI	206664_at	2.279931569	5.989020346	0.0679334	sucrase-isomaltase (alpha-glucosidase)
L36675	SNCA	207827_x_at	1.398818097	5.989020346	0.0543833	"synuclein, alpha (non A4 component of amyloid precursor)"
NM_001390	DTNA	208430_s_at	1.236391754	5.989020346	0.0408642	"dystrobrevin, alpha"
AB011446	AURKB	209464_at	0.785494621	5.989020346	0.0366118	aurora kinase B
AF020544	PPT2 /// EGFL8	209826_at	1.204092877	5.989020346	0.0405494	"palmitoyl-protein thioesterase 2 /// EGF-like-domain, multiple 8"
AF119855	PTPN11	209895_at	0.790200559	5.989020346	0.0385748	"protein tyrosine phosphatase, non-receptor type 11 (Noonan syndrome 1)"
BC003170	UBAP2L	209947_at	1.237634227	5.989020346	0.0508464	ubiquitin associated protein 2-like
AF212995	CUL4B	210257_x_at	1.229013975	5.989020346	0.0695144	cullin 4B
D63807	LSS	211018_at	1.685329496	5.989020346	0.0607602	"lanosterol synthase (2,3-oxidosqualene-lanosterol cyclase)"
BC006270	FLJ30092	211034_s_at	1.228976033	5.989020346	0.0579976	AF-1 specific protein phosphatase /// AF-1 specific protein phosphatase
L07950	HLA-B	211911_x_at	1.342390736	5.989020346	0.0450239	"major histocompatibility complex, class I, B /// major histocompatibility complex, class I, B"
BF038366	MAC30	212282_at	1.285025029	5.989020346	0.0616774	hypothetical protein MAC30
AB020681	ANKRD12	212289_at	1.207993608	5.989020346	0.0416924	ankyrin repeat domain 12
AI741784	CLASP2	212306_at	1.299006188	5.989020346	0.0488965	cytoplasmic linker associated protein 2
BE348236	WDFY3	212598_at	1.363415499	5.989020346	0.0438224	WD repeat and FYVE domain containing 3
AV728526	DTX4	212611_at	1.377748296	5.989020346	0.0590766	deltex 4 homolog (Drosophila)
AW165979	ZNF609	212620_at	1.242742431	5.989020346	0.0313668	zinc finger protein 609
AI823592	KIAA0423	213304_at	1.253098545	5.989020346	0.0545013	KIAA0423
AI693193	GBA	213448_at	1.509322231	5.989020346	0.0577074	"Glucosidase, beta; acid (includes glucosylceramidase)"
T62985	ACOX1	213501_at	0.810960126	5.989020346	0.0225721	"acyl-Coenzyme A oxidase 1, palmitoyl"
AA639705	SQLE	213577_at	1.262305791	5.989020346	0.0560228	squalene epoxidase
AW006438	GOLGA8A /// GOLGA8B	213650_at	1.345284007	5.989020346	0.0462984	"golgi autoantigen, golgin subfamily a, 8A /// golgi autoantigen, golgin subfamily a, 8B"
AA209420	ZNF75	213659_at	1.223697647	5.989020346	0.0554546	zinc finger protein 75 (D8C6)
AI186145	---	213686_at	1.368212839	5.989020346	0.0518671	Clone 24583 mRNA sequence
AW134976	KIAA0984	213913_s_at	0.779985602	5.989020346	0.0226407	KIAA0984 protein
AI307586	C10orf95	213964_x_at	0.725083202	5.989020346	0.0178996	Chromosome 10 open reading frame 95
AL137534	DKFZp434H1419	214717_at	1.251376229	5.989020346	0.0446081	hypothetical protein DKFZp434H1419
AW665865	PLCL3	214745_at	0.741158566	5.989020346	0.0367575	phospholipase C-like 3
AA777793	XYLB	214776_x_at	1.593554801	5.989020346	0.0172215	xylulokinase homolog (H. influenzae)
BE268538	MYCPBP	214787_at	1.350557693	5.989020346	0.0346184	c-myc promoter binding protein
BC005066	SMARCE1	214871_x_at	0.710758576	5.989020346	0.0213618	"SWI/SNF related, matrix associated, actin dependent regulator of chromatin, subfamily e, member 1"
AJ006835	RNU17D	215011_at	1.392867301	5.989020346	0.0386161	"RNA, U17D small nucleolar"
AU147942	PRDX2	215067_x_at	1.438219666	5.989020346	0.0575987	peroxiredoxin 2
AL109709	REC14	215156_at	1.214430231	5.989020346	0.0390976	WD repeat domain 61
AF222691	KNS2	216187_x_at	1.214722702	5.989020346	0.0515393	Kinesin 2
AL133267	LOC442175	216490_x_at	1.414756904	5.989020346	0.0274893	similar to dJ408B20.3 (novel protein similar to 60S acidic ribosomal protein P2 (RPLP2))
X80821	ANKRD12	216563_at	1.2103139	5.989020346	0.0520947	Ankyrin repeat domain 12
AL441988	---	216828_at	1.322601595	5.989020346	0.0264891	---
NM_018234	STEAP3	218424_s_at	0.724961278	5.989020346	0.0245624	STEAP family member 3
NM_024673	WDR59	218505_at	1.226248788	5.989020346	0.0499804	WD repeat domain 59
NM_018370	FLJ11259	218627_at	1.523799801	5.989020346	0.058206	hypothetical protein FLJ11259
NM_022899	ACTR8	218658_s_at	1.297262476	5.989020346	0.0401236	ARP8 actin-related protein 8 homolog (yeast)
NM_012213	MLYCD	218869_at	1.212960686	5.989020346	0.0396842	malonyl-CoA decarboxylase
NM_020184	CNNM4	218900_at	1.367825766	5.989020346	0.0441306	cyclin M4
NM_018013	FLJ10159	218974_at	1.20421379	5.989020346	0.0337359	hypothetical protein FLJ10159
NM_016049	C14orf122	219203_at	0.784170933	5.989020346	0.0394321	chromosome 14 open reading frame 122
NM_018941	CLN8	219341_at	1.249126104	5.989020346	0.0533274	"ceroid-lipofuscinosis, neuronal 8 (epilepsy, progressive with mental retardation)"
NM_018283	NUDT15	219347_at	0.795571066	5.989020346	0.0273814	nudix (nucleoside diphosphate linked moiety X)-type motif 15
NM_019023	PRMT7	219408_at	0.808159367	5.989020346	0.0242039	protein arginine N-methyltransferase 7
NM_025099	FLJ22170	219435_at	0.77853086	5.989020346	0.0211496	hypothetical protein FLJ22170
NM_024766	C2orf34	219617_at	1.3802577	5.989020346	0.0586017	chromosome 2 open reading frame 34
NM_018000	DSU	219648_at	1.256044618	5.989020346	0.032649	dilute suppressor
NM_018025	GPATC1	219818_s_at	1.202627093	5.989020346	0.0416026	G patch domain containing 1
NM_016644	LOC51334	220014_at	0.688537983	5.989020346	0.0347864	mesenchymal stem cell protein DSC54
NM_013378	VPREB3	220068_at	1.547961639	5.989020346	0.0339626	pre-B lymphocyte gene 3
NM_024998	C1orf107	220251_at	1.223257487	5.989020346	0.0383504	chromosome 1 open reading frame 107
NM_018463	MDS028	220590_at	1.50521614	5.989020346	0.0557111	uncharacterized hematopoietic stem/progenitor cells protein MDS028
NM_031210	C14orf156	221434_s_at	0.81862092	5.989020346	0.051551	chromosome 14 open reading frame 156 /// chromosome 14 open reading frame 156
BC000586	SCLY	221575_at	1.226227575	5.989020346	0.0678694	selenocysteine lyase
BC005342	NSBP1	221606_s_at	0.770060981	5.989020346	0.0303716	nucleosomal binding protein 1
AA886335	CALML4	221879_at	1.206695193	5.989020346	0.0542274	calmodulin-like 4
AL529396	YIPF2	221939_at	1.222679679	5.989020346	0.061375	"Yip1 domain family, member 2"
AW970944	PPIG	222375_at	1.81316737	5.989020346	0.0418065	Peptidyl-prolyl isomerase G (cyclophilin G)
AB007857	RUTBC1	36129_at	1.246010766	5.989020346	0.0523406	RUN and TBC1 domain containing 1
Z67743	CLCN7	38069_at	1.376426815	5.989020346	0.0830655	chloride channel 7
AI823980	RBKS	57540_at	0.820412064	5.989020346	0.0261739	ribokinase
NM_023009	MARCKSL1	200644_at	1.221580444	7.378017542	0.0796204	MARCKS-like 1
NM_006432	NPC2	200701_at	1.237718133	7.378017542	0.0807384	"Niemann-Pick disease, type C2"
NM_000391	TPP1	200743_s_at	1.204346337	7.378017542	0.0821948	tripeptidyl peptidase I
NM_017670	OTUB1	201246_s_at	0.802454181	7.378017542	0.0300548	"OTU domain, ubiquitin aldehyde binding 1"
NM_005627	SGK	201739_at	0.515254452	7.378017542	0.0193595	serum/glucocorticoid regulated kinase
AU154740	SUPT7L	201836_s_at	1.338929937	7.378017542	0.0559695	suppressor of Ty 7 (S. cerevisiae)-like
NM_002402	MEST	202016_at	0.824855187	7.378017542	0.0535401	mesoderm specific transcript homolog (mouse)
NM_001168	BIRC5	202095_s_at	0.810453618	7.378017542	0.0430504	baculoviral IAP repeat-containing 5 (survivin)
U64317	NEDD9	202150_s_at	1.305566913	7.378017542	0.0615795	"neural precursor cell expressed, developmentally down-regulated 9"
NM_005385	NKTR	202380_s_at	1.222447633	7.378017542	0.0673325	natural killer-tumor recognition sequence
BF432532	TIAL1	202405_at	1.220054659	7.378017542	0.0643484	TIA1 cytotoxic granule-associated RNA binding protein-like 1
NM_001071	TYMS	202589_at	0.815437801	7.378017542	0.0500643	thymidylate synthetase
BG423052	GRK6	202848_s_at	0.747355182	7.378017542	0.0371172	G protein-coupled receptor kinase 6
N21138	RHOBTB3	202975_s_at	1.201977966	7.378017542	0.0603299	Rho-related BTB domain containing 3
AF097493	GLS	203158_s_at	1.243792836	7.378017542	0.0467064	glutaminase
N33009	APOE	203381_s_at	1.428741616	7.378017542	0.0654297	apolipoprotein E
BG170541	MET	203510_at	1.482547468	7.378017542	0.0643454	met proto-oncogene (hepatocyte growth factor receptor)
NM_001896	CSNK2A2	203575_at	1.249548263	7.378017542	0.079287	"casein kinase 2, alpha prime polypeptide"
AI660619	SLC7A6	203579_s_at	1.322114803	7.378017542	0.0405039	"solute carrier family 7 (cationic amino acid transporter, y+ system), member 6"
NM_005781	TNK2	203839_s_at	1.322669502	7.378017542	0.0542299	"tyrosine kinase, non-receptor, 2"
NM_003069	SMARCA1	203875_at	0.706366955	7.378017542	0.0435447	"SWI/SNF related, matrix associated, actin dependent regulator of chromatin, subfamily a, member 1"
NM_001172	ARG2	203945_at	1.299184937	7.378017542	0.0845787	"arginase, type II"
AW295193	PHACTR2	204047_s_at	0.781089576	7.378017542	0.0306258	phosphatase and actin regulator 2
NM_005017	PCYT1A	204210_s_at	0.773355079	7.378017542	0.0102582	"phosphate cytidylyltransferase 1, choline, alpha"
NM_000199	SGSH	204293_at	0.733473038	7.378017542	0.028611	N-sulfoglucosamine sulfohydrolase (sulfamidase)
AB002295	KIAA0329	204307_at	1.339439939	7.378017542	0.0529765	KIAA0329
AF080255	TTF2	204407_at	0.815102704	7.378017542	0.0302918	"transcription termination factor, RNA polymerase II"
NM_006315	PCGF3	204564_at	1.321342309	7.378017542	0.060145	polycomb group ring finger 3
NM_002757	MAP2K5	204756_at	1.205777628	7.378017542	0.0401563	mitogen-activated protein kinase kinase 5
AW102783	HOXB7	204778_x_at	1.384079489	7.378017542	0.0583803	homeo box B7
NM_003829	MPDZ	205079_s_at	1.21049417	7.378017542	0.0646838	multiple PDZ domain protein
NM_000057	BLM	205733_at	0.781113278	7.378017542	0.0299443	Bloom syndrome
NM_003417	ZNF264	205917_at	1.308327228	7.378017542	0.0637891	zinc finger protein 264
NM_004059	CCBL1	206037_at	1.238608104	7.378017542	0.0732589	"cysteine conjugate-beta lyase; cytoplasmic (glutamine transaminase K, kyneurenine aminotransferase)"
NM_013360	ZNF222	206175_x_at	1.637511241	7.378017542	0.0428295	zinc finger protein 222
NM_002269	KPNA5	206241_at	1.263765153	7.378017542	0.0345251	karyopherin alpha 5 (importin alpha 6)
AJ223333	DNMT2	206308_at	0.771000586	7.378017542	0.0182844	DNA (cytosine-5-)-methyltransferase 2
NM_005794	DHRS2	206463_s_at	0.509688548	7.378017542	0.0536081	dehydrogenase/reductase (SDR family) member 2
NM_005668	ST8SIA4	206925_at	0.790274812	7.378017542	0.012183	"ST8 alpha-N-acetyl-neuraminide alpha-2,8-sialyltransferase 4"
NM_016378	VCX /// VCX2 /// VCX3A /// VCX-C	207281_x_at	1.328743377	7.378017542	0.0736135	"variable charge, X-linked /// variable charge, X-linked 2 /// variable charge, X-linked 3A /// variably charged X-C"
NM_030878	CYP2C8	208147_s_at	1.943302509	7.378017542	0.0811503	"cytochrome P450, family 2, subfamily C, polypeptide 8 /// cytochrome P450, family 2, subfamily C, polypeptide 8"
NM_004414	DSCR1	208370_s_at	1.239824445	7.378017542	0.038507	Down syndrome critical region gene 1
AL031714	UBE2I	208760_at	1.247222973	7.378017542	0.0683273	"Ubiquitin-conjugating enzyme E2I (UBC9 homolog, yeast)"
AV704962	SC4MOL	209146_at	1.205792288	7.378017542	0.0734007	sterol-C4-methyl oxidase-like
BC002508	ASMTL	209394_at	0.826186434	7.378017542	0.0413417	acetylserotonin O-methyltransferase-like
BC002857	HOM-TES-103	209721_s_at	1.372601347	7.378017542	0.0591817	HOM-TES-103 tumor antigen-like
BE550599	CACNA1D	210108_at	1.519359235	7.378017542	0.0423638	"calcium channel, voltage-dependent, L type, alpha 1D subunit"
BC002557	GATA2	210358_x_at	0.802293981	7.378017542	0.0483579	GATA binding protein 2
AF022375	VEGF	210512_s_at	1.282778251	7.378017542	0.0654765	vascular endothelial growth factor
AF220130	TRIM14	210846_x_at	0.761468637	7.378017542	0.0251182	tripartite motif-containing 14
BC004908	FSCN1	210933_s_at	1.210443317	7.378017542	0.042798	"fascin homolog 1, actin-bundling protein (Strongylocentrotus purpuratus)"
AF123570	NF2	211017_s_at	0.739093246	7.378017542	0.0288639	neurofibromin 2 (bilateral acoustic neuroma)
AF220152	TACC2	211382_s_at	1.221204901	7.378017542	0.0640484	"transforming, acidic coiled-coil containing protein 2"
AF133588	RAB36	211471_s_at	1.270111183	7.378017542	0.0642888	"RAB36, member RAS oncogene family"
M20206	LAMB1	211651_s_at	1.237507855	7.378017542	0.0512071	"laminin, beta 1 /// laminin, beta 1"
AF219138	GGA3	211815_s_at	1.323021573	7.378017542	0.0440762	"golgi associated, gamma adaptin ear containing, ARF binding protein 3"
AK024651	GPR107	211977_at	0.812942922	7.378017542	0.0228182	G protein-coupled receptor 107
AI978623	OBSL1	212775_at	1.334624263	7.378017542	0.0326879	obscurin-like 1
U69127	FUBP3	212824_at	1.229044367	7.378017542	0.055472	far upstream element (FUSE) binding protein 3
AF263541	DYRK4	212954_at	0.793082338	7.378017542	0.036281	dual-specificity tyrosine-(Y)-phosphorylation regulated kinase 4
AI130920	PABPN1	213046_at	1.209778113	7.378017542	0.0595139	"poly(A) binding protein, nuclear 1"
AW058600	SLC36A1	213119_at	1.365338391	7.378017542	0.0730645	"solute carrier family 36 (proton/amino acid symporter), member 1"
BG251521	---	213156_at	1.29204661	7.378017542	0.0833522	MRNA; cDNA DKFZp586B211 (from clone DKFZp586B211)
R78668	CDKN1C	213182_x_at	1.351645126	7.378017542	0.0791373	"cyclin-dependent kinase inhibitor 1C (p57, Kip2)"
W58342	13CDNA73	214319_at	0.690804343	7.378017542	0.0146679	Hypothetical protein CG003
AI962377	PPFIBP1 /// LOC440091	214375_at	1.667208406	7.378017542	0.0400913	"PTPRF interacting protein, binding protein 1 (liprin beta 1) /// similar to PTPRF interacting protein binding protein 1 isoform 1; liprin-beta 1; liprin related protein; protein-tyrosine phosphatase receptor-type f polypeptide-interacting protein-binding
AA747379	CALCB	214636_at	0.792280699	7.378017542	0.0335937	"calcitonin-related polypeptide, beta"
AI200443	MAGEA5	214642_x_at	0.830347182	7.378017542	0.0357614	"melanoma antigen family A, 5"
AU121975	PAICS	214664_at	0.815691707	7.378017542	0.0207089	"phosphoribosylaminoimidazole carboxylase, phosphoribosylaminoimidazole succinocarboxamide synthetase"
AB046861	KIAA1641	214723_x_at	1.354045029	7.378017542	0.0391603	KIAA1641
U50529	LOC88523	214748_at	1.591506645	7.378017542	0.0520508	CG016
AL551046	HSPB6	214767_s_at	0.744003841	7.378017542	0.049246	"heat shock protein, alpha-crystallin-related, B6"
AA731713	DDN	214788_x_at	2.126724041	7.378017542	0.0607493	dendrin
AF131748	SUCLG2	214835_s_at	0.789634591	7.378017542	0.0442728	"succinate-CoA ligase, GDP-forming, beta subunit"
AU150691	LOC257152	215302_at	1.462754593	7.378017542	0.0104028	hypothetical protein LOC257152
AK000787	SEMA6A	215479_at	1.260831448	7.378017542	0.0589008	"Sema domain, transmembrane domain (TM), and cytoplasmic domain, (semaphorin) 6A"
AL050185	---	215525_at	1.370916551	7.378017542	0.037798	---
AK001290	PLA2G6	215938_s_at	1.265740811	7.378017542	0.0466892	"phospholipase A2, group VI (cytosolic, calcium-independent)"
AF277724	CDC25C	217010_s_at	0.69080455	7.378017542	0.036619	cell division cycle 25C
AL096716	RDH11	217042_at	1.246915218	7.378017542	0.0562712	retinol dehydrogenase 11 (all-trans and 9-cis)
BE515346	ZNF573	217627_at	1.241108272	7.378017542	0.0621499	zinc finger protein 573
NM_012105	BACE2	217867_x_at	1.269178698	7.378017542	0.0411385	beta-site APP-cleaving enzyme 2
NM_018589	CHES1	218031_s_at	1.366104675	7.378017542	0.0650175	checkpoint suppressor 1
AF070673	SNN	218032_at	1.215076499	7.378017542	0.0430148	stannin
NM_024948	C10orf97	218297_at	0.552638313	7.378017542	0.0486412	chromosome 10 open reading frame 97
NM_020062	SLC2A4RG	218494_s_at	0.820361064	7.378017542	0.0474781	SLC2A4 regulator
NM_018129	PNPO	218511_s_at	0.804060289	7.378017542	0.0399813	pyridoxine 5'-phosphate oxidase
NM_018131	C10orf3	218542_at	0.819580358	7.378017542	0.0403423	chromosome 10 open reading frame 3
NM_006926	SFTPA2	218835_at	1.551226332	7.378017542	0.0596237	"surfactant, pulmonary-associated protein A2"
NM_024555	FBXL6	219189_at	0.83306891	7.378017542	0.026187	F-box and leucine-rich repeat protein 6
NM_003632	CNTNAP1	219400_at	1.346490543	7.378017542	0.0425605	contactin associated protein 1
NM_006596	POLQ	219510_at	0.795058931	7.378017542	0.0305567	"polymerase (DNA directed), theta"
NM_004923	MTL5	219786_at	1.537758078	7.378017542	0.0384318	"metallothionein-like 5, testis-specific (tesmin)"
NM_014155	BTBD15	220243_at	1.356925945	7.378017542	0.0431131	BTB (POZ) domain containing 15
NM_018627	CAMSAP1	220410_s_at	1.273568111	7.378017542	0.0288925	calmodulin regulated spectrin-associated protein 1
NM_025117	---	220915_s_at	1.732984766	7.378017542	0.0972679	MRNA similar to hypothetical protein FLJ11871 (cDNA clone IMAGE:6160816)
NM_030915	LBH	221011_s_at	0.689545709	7.378017542	0.0260577	likely ortholog of mouse limb-bud and heart gene /// likely ortholog of mouse limb-bud and heart gene
AF229069	LOC339047	221501_x_at	1.22415171	7.378017542	0.0766158	hypothetical protein LOC339047
AF112204	ATP6V1H	221504_s_at	1.221785669	7.378017542	0.0929366	"ATPase, H+ transporting, lysosomal 50/57kDa, V1 subunit H"
U15642	E2F5	221586_s_at	1.397539516	7.378017542	0.0702587	"E2F transcription factor 5, p130-binding"
AW118072	RAB6B	221792_at	1.363064129	7.378017542	0.0543115	"RAB6B, member RAS oncogene family"
BE565675	FAM45B /// FAM45A	221804_s_at	1.231891686	7.378017542	0.0794393	"family with sequence similarity 45, member B /// family with sequence similarity 45, member A"
AW026481	KCTD13	221889_at	1.245053108	7.378017542	0.0676615	potassium channel tetramerisation domain containing 13
AK022280	PHF20L1	222133_s_at	1.224167613	7.378017542	0.0415225	PHD finger protein 20-like 1
AC007766	TLE6	222219_s_at	1.403713057	7.378017542	0.0317797	"transducin-like enhancer of split 6 (E(sp1) homolog, Drosophila)"
AK000550	PLA2G4B	222256_s_at	0.692174327	7.378017542	0.0424239	"phospholipase A2, group IVB (cytosolic)"
AW974910	TBL1Y	222356_at	1.354198602	7.378017542	0.0391713	Transducin (beta)-like 1Y-linked
Y15521	ASMTL	36554_at	0.827226561	7.378017542	0.0475502	acetylserotonin O-methyltransferase-like
AA845577	ZNF335	78330_at	1.251323724	7.378017542	0.024821	zinc finger protein 335
X56841	HLA-E	200904_at	1.529109276	8.721295399	0.0728601	"major histocompatibility complex, class I, E"
AI537887	STOM	201060_x_at	1.311878427	8.721295399	0.090261	stomatin
Z48199	SDC1	201286_at	1.253007317	8.721295399	0.0884779	syndecan 1
NM_002997	SDC1	201287_s_at	1.20082246	8.721295399	0.102851	syndecan 1
N24643	WSB1	201294_s_at	0.820417548	8.721295399	0.0461492	WD repeat and SOCS box-containing 1
NM_005808	CTDSPL	201906_s_at	1.210119479	8.721295399	0.0912424	"CTD (carboxy-terminal domain, RNA polymerase II, polypeptide A) small phosphatase-like"
AI743792	ST6GAL1	201998_at	1.314977164	8.721295399	0.100094	"ST6 beta-galactosamide alpha-2,6-sialyltranferase 1"
AI458128	CBX6	202047_s_at	0.818791165	8.721295399	0.0566973	chromobox homolog 6
NM_003192	TBCC	202495_at	0.83065841	8.721295399	0.0457945	tubulin-specific chaperone c
BC001046	TXNL4A	202835_at	1.233169952	8.721295399	0.0638307	thioredoxin-like 4A
NM_012145	DTYMK	203270_at	0.799109681	8.721295399	0.0496413	deoxythymidylate kinase (thymidylate kinase)
NM_000788	DCK	203302_at	0.827806305	8.721295399	0.0504555	deoxycytidine kinase
NM_000195	HPS1	203309_s_at	1.266437341	8.721295399	0.0598531	Hermansky-Pudlak syndrome 1
NM_006214	PHYH	203335_at	1.281238717	8.721295399	0.103394	phytanoyl-CoA hydroxylase (Refsum disease)
T79216	OTUD4	203479_s_at	1.202524936	8.721295399	0.0764766	OTU domain containing 4
NM_014665	LRRC14	203495_at	1.211865614	8.721295399	0.0815277	leucine rich repeat containing 14
NM_004925	AQP3	203747_at	1.220215665	8.721295399	0.0782044	aquaporin 3
AI806984	RARA	203749_s_at	1.273827174	8.721295399	0.0495157	"retinoic acid receptor, alpha"
NM_014750	DLG7	203764_at	0.829563191	8.721295399	0.0465185	"discs, large homolog 7 (Drosophila)"
NM_022344	NJMU-R1	203830_at	0.760958694	8.721295399	0.0376815	protein kinase Njmu-R1
AI761713	MMP11	203876_s_at	1.404609983	8.721295399	0.0515413	matrix metallopeptidase 11 (stromelysin 3)
AI870749	MAPT	203928_x_at	1.32248852	8.721295399	0.0530791	microtubule-associated protein tau
NM_001254	CDC6	203968_s_at	0.8128461	8.721295399	0.057715	CDC6 cell division cycle 6 homolog (S. cerevisiae)
NM_005044	PRKX	204061_at	1.33972931	8.721295399	0.0676829	"protein kinase, X-linked"
NM_023037	13CDNA73	204072_s_at	1.269651325	8.721295399	0.0974365	hypothetical protein CG003
NM_006101	KNTC2	204162_at	0.79808338	8.721295399	0.0606999	kinetochore associated 2
NM_014002	IKBKE	204549_at	0.80098682	8.721295399	0.0296671	"inhibitor of kappa light polypeptide gene enhancer in B-cells, kinase epsilon"
NM_004508	IDI1	204615_x_at	1.296458796	8.721295399	0.0957496	isopentenyl-diphosphate delta isomerase 1
NM_018950	HLA-F	204806_x_at	1.313804623	8.721295399	0.0780488	"major histocompatibility complex, class I, F"
AI419307	TRIM3	204910_s_at	0.725067703	8.721295399	0.0281625	tripartite motif-containing 3
NM_005476	GNE	205042_at	1.250274372	8.721295399	0.0650286	glucosamine (UDP-N-acetyl)-2-epimerase/N-acetylmannosamine kinase
NM_006915	RP2	205191_at	0.790125701	8.721295399	0.0252618	retinitis pigmentosa 2 (X-linked recessive)
NM_001200	BMP2	205290_s_at	1.284569171	8.721295399	0.100653	bone morphogenetic protein 2
BF971416	SMAD3	205396_at	1.268434857	8.721295399	0.0678443	"SMAD, mothers against DPP homolog 3 (Drosophila)"
NM_016656	RRAGB	205540_s_at	1.321462117	8.721295399	0.0721246	Ras-related GTP binding B
NM_001392	DTNA	205741_s_at	0.808860179	8.721295399	0.0260764	"dystrobrevin, alpha"
NM_002612	PDK4	205960_at	1.427999498	8.721295399	0.0871808	"pyruvate dehydrogenase kinase, isoenzyme 4"
NM_003542	HIST1H4C	205967_at	0.630089775	8.721295399	0.0588433	"histone 1, H4c"
NM_005023	PGGT1B	206288_at	0.818533915	8.721295399	0.0474764	"protein geranylgeranyltransferase type I, beta subunit"
NM_004654	USP9Y	206624_at	1.371403462	8.721295399	0.0812531	"ubiquitin specific peptidase 9, Y-linked (fat facets-like, Drosophila)"
NM_000711	BGLAP /// PMF1	206956_at	1.239568847	8.721295399	0.0770018	bone gamma-carboxyglutamate (gla) protein (osteocalcin) /// polyamine-modulated factor 1
NM_017540	GALNT10	207357_s_at	1.338288649	8.721295399	0.077743	UDP-N-acetyl-alpha-D-galactosamine:polypeptide N-acetylgalactosaminyltransferase 10 (GalNAc-T10)
NM_024498	ZNF117	207605_x_at	1.435071746	8.721295399	0.0800382	zinc finger protein 117 (HPF9)
NM_004723	ARHGEF2	207629_s_at	1.210638005	8.721295399	0.0688364	rho/rac guanine nucleotide exchange factor (GEF) 2
NM_013314	BLNK	207655_s_at	1.249890159	8.721295399	0.0655944	B-cell linker
NM_014893	NLGN4Y	207703_at	1.463462977	8.721295399	0.06559	"neuroligin 4, Y-linked"
NM_001149	ANK3	207950_s_at	1.205718528	8.721295399	0.0620955	"ankyrin 3, node of Ranvier (ankyrin G)"
BC004489	HLA-C	208812_x_at	1.729478038	8.721295399	0.100358	"major histocompatibility complex, class I, C"
BE675435	KLF6	208960_s_at	1.369317334	8.721295399	0.0825148	Kruppel-like factor 6
AW148844	GPM6B	209168_at	1.2301777	8.721295399	0.052337	glycoprotein M6B
U76248	SIAH2	209339_at	1.244743589	8.721295399	0.0915782	seven in absentia homolog 2 (Drosophila) /// seven in absentia homolog 2 (Drosophila)
D84109	RBPMS	209487_at	1.294712621	8.721295399	0.0781927	RNA binding protein with multiple splicing
AF245447	SPHK2	209857_s_at	1.574017629	8.721295399	0.0891684	sphingosine kinase 2
AF284095	ADRA2A	209869_at	0.720217598	8.721295399	0.0630827	"adrenergic, alpha-2A-, receptor /// adrenergic, alpha-2A-, receptor"
AF225981	ATP2C1	209935_at	1.204435553	8.721295399	0.0529221	"ATPase, Ca++ transporting, type 2C, member 1"
L23928	SHMT1	209980_s_at	0.794064632	8.721295399	0.0529152	serine hydroxymethyltransferase 1 (soluble)
AF078842	TTLL3	210129_s_at	1.264433081	8.721295399	0.062708	"tubulin tyrosine ligase-like family, member 3"
AF101477	GNMT	210328_at	0.702700992	8.721295399	0.0596878	glycine N-methyltransferase
L02840	KCNB1	211006_s_at	1.375975107	8.721295399	0.0557223	"potassium voltage-gated channel, Shab-related subfamily, member 1"
D63807	LSS	211019_s_at	1.391984654	8.721295399	0.104876	"lanosterol synthase (2,3-oxidosqualene-lanosterol cyclase)"
BC006373	SRD5A1	211056_s_at	1.221585684	8.721295399	0.0900589	"steroid-5-alpha-reductase, alpha polypeptide 1 (3-oxo-5 alpha-steroid delta 4-dehydrogenase alpha 1) /// steroid-5-alpha-reductase, alpha polypeptide 1 (3-oxo-5 alpha-steroid delta 4-dehydrogenase alpha 1)"
U07820	CNTN1	211203_s_at	1.438327049	8.721295399	0.0827032	contactin 1
AF180519	GABARAPL1 /// GABARAPL3	211458_s_at	1.301290968	8.721295399	0.0755534	GABA(A) receptor-associated protein like 1 /// GABA(A) receptors associated protein like 3
D25284	GALC	211810_s_at	0.815865633	8.721295399	0.024234	galactosylceramidase (Krabbe disease)
BE779865	MAC30	212279_at	1.221781998	8.721295399	0.089599	hypothetical protein MAC30
BF038366	MAC30	212281_s_at	1.278920722	8.721295399	0.0932045	hypothetical protein MAC30
BG111260	HIPK1	212293_at	1.297693817	8.721295399	0.0779056	homeodomain interacting protein kinase 1
AA142929	MEF2A	212535_at	1.217323965	8.721295399	0.0751247	"MADS box transcription enhancer factor 2, polypeptide A (myocyte enhancer factor 2A)"
AB028989	MAPK8IP3	213178_s_at	1.315154969	8.721295399	0.0746859	mitogen-activated protein kinase 8 interacting protein 3
AB018322	TMCC1	213351_s_at	1.287230077	8.721295399	0.0683439	transmembrane and coiled-coil domain family 1
AL050374	ABTB2	213497_at	1.350366885	8.721295399	0.0818051	ankyrin repeat and BTB (POZ) domain containing 2
BF979497	SQLE	213562_s_at	1.29703116	8.721295399	0.0757055	squalene epoxidase
BF593509	MYBPC1	214087_s_at	1.508168608	8.721295399	0.082723	"myosin binding protein C, slow type"
BE674061	PIN4	214225_at	1.34724544	8.721295399	0.0717838	"protein (peptidyl-prolyl cis/trans isomerase) NIMA-interacting, 4 (parvulin)"
AW241864	CELSR1	214353_at	1.280612827	8.721295399	0.0607921	"Cadherin, EGF LAG seven-pass G-type receptor 1 (flamingo homolog, Drosophila)"
AA004579	TAF1B	214690_at	0.564328227	8.721295399	0.0242099	"TATA box binding protein (TBP)-associated factor, RNA polymerase I, B, 63kDa"
AI357539	LRCH3	214739_at	1.210425158	8.721295399	0.0616623	leucine-rich repeats and calponin homology (CH) domain containing 3
AY007087	USF2	214879_x_at	1.204600553	8.721295399	0.070695	"upstream transcription factor 2, c-fos interacting"
AV695711	ST6GAL1	214971_s_at	1.262237692	8.721295399	0.0722497	"ST6 beta-galactosamide alpha-2,6-sialyltranferase 1"
AA319460	LOC92558	215015_at	1.207605447	8.721295399	0.0697228	hypothetical protein LOC92558
AL050074	---	215186_at	1.310782296	8.721295399	0.0527686	Hypothetical gene supported by AK123272
AL031133	SUMO4	215452_x_at	0.811455674	8.721295399	0.0558504	SMT3 suppressor of mif two 3 homolog 4 (yeast)
AU144919	C14orf111	215567_at	1.379974554	8.721295399	0.0260634	chromosome 14 open reading frame 111
AF238870	SNCA	215811_at	1.69759322	8.721295399	0.0424178	"Synuclein, alpha (non A4 component of amyloid precursor)"
AF070620	---	216006_at	1.846299853	8.721295399	0.0340756	Clone 24694 mRNA sequence
AL050032	ROCK1	216621_at	1.492362752	8.721295399	0.0623629	"Rho-associated, coiled-coil containing protein kinase 1"
S73854	NF2	217150_s_at	0.74215313	8.721295399	0.0309626	neurofibromin 2 (bilateral acoustic neuroma)
Z95118	ZNF259	217185_s_at	0.818667667	8.721295399	0.0548945	zinc finger protein 259
AC006530	MLH3	217216_x_at	1.202333873	8.721295399	0.0639308	mutL homolog 3 (E. coli)
AF179281	IDS	217432_s_at	1.256137095	8.721295399	0.0633543	iduronate 2-sulfatase (Hunter syndrome)
AI879383	GGA1	217560_at	1.568706054	8.721295399	0.0573746	"golgi associated, gamma adaptin ear containing, ARF binding protein 1"
BF447272	CALCA	217561_at	0.630607435	8.721295399	0.0197389	"calcitonin/calcitonin-related polypeptide, alpha"
AA649851	UPF3A	217596_at	0.765479682	8.721295399	0.0317301	UPF3 regulator of nonsense transcripts homolog A (yeast)
AL566824	CDC27	217879_at	0.833243984	8.721295399	0.0526265	cell division cycle 27
NM_006342	TACC3	218308_at	0.824021793	8.721295399	0.0544967	"transforming, acidic coiled-coil containing protein 3"
NM_023925	C1QDC1	218456_at	1.307215927	8.721295399	0.0899633	C1q domain containing 1
NM_012177	FBXO5	218875_s_at	0.816173703	8.721295399	0.0378331	F-box protein 5
NM_018271	FLJ10916	219044_at	1.312997905	8.721295399	0.0703962	hypothetical protein FLJ10916
NM_024648	FLJ22222	219254_at	0.823098247	8.721295399	0.0239644	hypothetical protein FLJ22222
NM_004708	PDCD5	219275_at	0.8120988	8.721295399	0.0596435	programmed cell death 5
NM_022751	FAM59A	219377_at	1.216570347	8.721295399	0.0355576	"family with sequence similarity 59, member A"
NM_025108	FLJ13909	219556_at	0.793281756	8.721295399	0.0521707	hypothetical protein FLJ13909
NM_014427	CPNE7	219707_at	1.200003862	8.721295399	0.0854425	copine VII
NM_024307	GDPD3	219722_s_at	1.214101707	8.721295399	0.054536	glycerophosphodiester phosphodiesterase domain containing 3
NM_020973	GBA3	219954_s_at	0.720512145	8.721295399	0.015218	"glucosidase, beta, acid 3 (cytosolic)"
NM_017915	FLJ20641	220060_s_at	0.816360833	8.721295399	0.0404478	hypothetical protein FLJ20641
NM_016371	HSD17B7	220081_x_at	1.348451377	8.721295399	0.0860143	hydroxysteroid (17-beta) dehydrogenase 7
NM_017738	C9orf39	220095_at	1.214005205	8.721295399	0.0436646	chromosome 9 open reading frame 39
NM_022568	ALDH8A1	220148_at	1.525212715	8.721295399	0.0503814	"aldehyde dehydrogenase 8 family, member A1"
NM_025061	LRRC8E	220174_at	1.209173883	8.721295399	0.0447848	"leucine rich repeat containing 8 family, member E"
NM_022034	CUZD1	220275_at	1.33968046	8.721295399	0.0677567	CUB and zona pellucida-like domains 1
NM_017779	DEPDC1	220295_x_at	0.820581451	8.721295399	0.0436827	DEP domain containing 1
NM_020233	NBLA03831	220606_s_at	1.214508438	8.721295399	0.0790128	putative protein product of Nbla03831
NM_014147	HSPC047	220692_at	1.210392519	8.721295399	0.0628965	HSPC047 protein
NM_005295	GPR22	221288_at	1.346382837	8.721295399	0.0405736	G protein-coupled receptor 22
NM_006654	FRS2	221308_at	1.219145824	8.721295399	0.0475887	fibroblast growth factor receptor substrate 2
BF691447	B4GALT5	221484_at	1.213355552	8.721295399	0.0881104	"UDP-Gal:betaGlcNAc beta 1,4- galactosyltransferase, polypeptide 5"
AA993099	CGI-48	222038_s_at	1.424778695	8.721295399	0.0838692	WD repeat domain 50
AA837026	---	222276_at	1.293952175	8.721295399	0.0784087	"Transcribed locus, weakly similar to XP_517454.1 PREDICTED: similar to hypothetical protein MGC45438 [Pan troglodytes]"
AI907083	---	222380_s_at	1.208553791	8.721295399	0.0791196	Similar to Microneme antigen
AB018333	SASH1	41644_at	1.225870947	8.721295399	0.0794129	SAM and SH3 domain containing 1
N80935	---	49111_at	1.299290664	8.721295399	0.0851748	MRNA; cDNA DKFZp762M127 (from clone DKFZp762M127)
AI830563	C9orf116	59437_at	0.787860936	8.721295399	0.0192922	chromosome 9 open reading frame 116
AI743331	C20orf67	89948_at	0.780888354	8.721295399	0.0398975	chromosome 20 open reading frame 67
M27319	CALM1	200653_s_at	0.832705516	10.58589837	0.057982	"calmodulin 1 (phosphorylase kinase, delta)"
AB032261	SCD	200832_s_at	1.218341368	10.58589837	0.106776	stearoyl-CoA desaturase (delta-9-desaturase)
AK025843	KIAA0992	200906_s_at	1.435192513	10.58589837	0.0805561	palladin
U36189	C5orf13	201309_x_at	1.326255679	10.58589837	0.099245	chromosome 5 open reading frame 13
BE974098	TPD52	201689_s_at	0.833230363	10.58589837	0.0562673	tumor protein D52
AW150953	DHCR7	201790_s_at	1.219983386	10.58589837	0.129588	7-dehydrocholesterol reductase
NM_000235	LIPA	201847_at	1.278020554	10.58589837	0.123152	"lipase A, lysosomal acid, cholesterol esterase (Wolman disease)"
BF031714	CTDSPL	201904_s_at	1.251440908	10.58589837	0.112458	"CTD (carboxy-terminal domain, RNA polymerase II, polypeptide A) small phosphatase-like"
AA020938	PKD1	202327_s_at	1.261484106	10.58589837	0.0743062	polycystic kidney disease 1 (autosomal dominant)
NM_002957	RXRA	202449_s_at	1.209627957	10.58589837	0.0930227	"retinoid X receptor, alpha"
NM_014649	SAFB2	203280_at	1.209223195	10.58589837	0.102082	scaffold attachment factor B2
BF063271	GALNT3	203397_s_at	1.357571159	10.58589837	0.128455	UDP-N-acetyl-alpha-D-galactosamine:polypeptide N-acetylgalactosaminyltransferase 3 (GalNAc-T3)
NM_001286	CLCN6	203950_s_at	1.449659096	10.58589837	0.0864005	chloride channel 6
NM_004711	SYNGR1	204287_at	1.350088407	10.58589837	0.10382	synaptogyrin 1
BG260394	SNCA	204466_s_at	1.628553291	10.58589837	0.135018	"synuclein, alpha (non A4 component of amyloid precursor) /// synuclein, alpha (non A4 component of amyloid precursor)"
NM_003579	RAD54L	204558_at	0.799284161	10.58589837	0.0674381	RAD54-like (S. cerevisiae)
AL031670	RNF24	204668_at	0.748306773	10.58589837	0.0261367	ring finger protein 24
NM_007244	PRR4	204919_at	1.275517997	10.58589837	0.119759	proline rich 4 (lacrimal)
NM_015699	AHDC1	205002_at	1.227125879	10.58589837	0.0759309	"AT hook, DNA binding motif, containing 1"
AA669336	COCH	205229_s_at	1.312935271	10.58589837	0.112857	"coagulation factor C homolog, cochlin (Limulus polyphemus)"
NM_024810	CXorf45	205584_at	1.218408961	10.58589837	0.079766	chromosome X open reading frame 45
NM_002147	HOXB5	205601_s_at	1.237202627	10.58589837	0.100838	homeo box B5
NM_004644	AP3B2	205678_at	1.322676414	10.58589837	0.107542	"adaptor-related protein complex 3, beta 2 subunit"
NM_003645	SLC27A2	205768_s_at	1.204845214	10.58589837	0.0987699	"solute carrier family 27 (fatty acid transporter), member 2"
NM_005330	HBE1	205919_at	1.474753057	10.58589837	0.117689	"hemoglobin, epsilon 1 /// hemoglobin, epsilon 1"
NM_004795	KL	205978_at	1.45320782	10.58589837	0.0104851	klotho
NM_004794	RAB33A	206039_at	1.234685541	10.58589837	0.0564948	"RAB33A, member RAS oncogene family"
NM_018662	DISC1	206090_s_at	1.612050956	10.58589837	0.0832456	disrupted in schizophrenia 1
NM_002387	MCC	206132_at	1.377627074	10.58589837	0.0763194	mutated in colorectal cancers
AW299598	HOXC4 /// FLJ12825	206194_at	0.790626658	10.58589837	0.0425209	homeo box C4 /// hypothetical gene supported by AK022887; AK056417
NM_004490	GRB14	206204_at	1.4204288	10.58589837	0.109218	growth factor receptor-bound protein 14
NM_004721	MAP3K13	206249_at	1.271074656	10.58589837	0.0821938	mitogen-activated protein kinase kinase kinase 13
NM_000512	GALNS	206335_at	1.278896888	10.58589837	0.100924	"galactosamine (N-acetyl)-6-sulfate sulfatase (Morquio syndrome, mucopolysaccharidosis type IVA)"
U53784	PON1	206344_at	1.639034724	10.58589837	0.0745686	paraoxonase 1
NM_014951	ZNF365	206448_at	0.593988955	10.58589837	0.0235302	zinc finger protein 365
NM_001721	BMX	206464_at	2.384566947	10.58589837	0.1168	BMX non-receptor tyrosine kinase
NM_005761	PLXNC1	206471_s_at	1.46305213	10.58589837	0.0455443	plexin C1
NM_003447	ZNF165	206683_at	1.361912628	10.58589837	0.11771	zinc finger protein 165
NM_004163	RAB27B	207017_at	1.495728626	10.58589837	0.0630044	"RAB27B, member RAS oncogene family"
NM_000050	ASS	207076_s_at	1.290890011	10.58589837	0.0905336	argininosuccinate synthetase
NM_000208	INSR	207851_s_at	1.219192078	10.58589837	0.077621	insulin receptor
NM_005575	LNPEP	207904_s_at	1.221886756	10.58589837	0.0706556	leucyl/cystinyl aminopeptidase
NM_020113	ACRV1	207991_x_at	1.382599155	10.58589837	0.0798057	acrosomal vesicle protein 1
NM_001331	CTNND1	208407_s_at	1.217149643	10.58589837	0.100648	"catenin (cadherin-associated protein), delta 1"
AI885670	SEPHS1	208940_at	1.279237199	10.58589837	0.118137	Selenophosphate synthetase 1
BC002327	BICD2	209203_s_at	1.238966674	10.58589837	0.10481	bicaudal D homolog 2 (Drosophila)
AB041926	MINK1	209241_x_at	0.751413207	10.58589837	0.0378716	misshapen-like kinase 1 (zebrafish)
AF015593	CLN3	209275_s_at	1.468786119	10.58589837	0.116403	"ceroid-lipofuscinosis, neuronal 3, juvenile (Batten, Spielmeyer-Vogt disease)"
AL136892	FLJ20323	209672_s_at	0.671616464	10.58589837	0.0375796	hypothetical protein FLJ20323
AF097419	NFKBIL1	209973_at	1.316067966	10.58589837	0.0846468	nuclear factor of kappa light polypeptide gene enhancer in B-cells inhibitor-like 1
AB044805	PFKFB2	209992_at	1.661007163	10.58589837	0.107406	"6-phosphofructo-2-kinase/fructose-2,6-biphosphatase 2"
U79286	HRMT1L1	210384_at	1.402430332	10.58589837	0.0551149	HMT1 hnRNP methyltransferase-like 1 (S. cerevisiae)
AF077973	CLN3	210859_x_at	1.313365741	10.58589837	0.128323	"ceroid-lipofuscinosis, neuronal 3, juvenile (Batten, Spielmeyer-Vogt disease)"
AF334812	RAB11FIP5	210879_s_at	1.20637044	10.58589837	0.0817523	RAB11 family interacting protein 5 (class I)
AB006756	PCDH7	210941_at	0.578651651	10.58589837	0.00726971	BH-protocadherin (brain-heart)
L20492	GGTLA4	211416_x_at	0.806392243	10.58589837	0.043833	gamma-glutamyltransferase-like activity 4
U70862	NFIB	211466_at	1.396988721	10.58589837	0.0879424	nuclear factor I/B
AB050468	LRIG1	211596_s_at	1.209638021	10.58589837	0.0749296	leucine-rich repeats and immunoglobulin-like domains 1 /// leucine-rich repeats and immunoglobulin-like domains 1
U31110	TRPC1	211602_s_at	1.392748211	10.58589837	0.0875326	"transient receptor potential cation channel, subfamily C, member 1 /// transient receptor potential cation channel, subfamily C, member 1"
BC005896	HYAL3	211728_s_at	1.353977939	10.58589837	0.0939835	hyaluronoglucosaminidase 3 /// hyaluronoglucosaminidase 3
BC005916	PTN	211737_x_at	1.270940526	10.58589837	0.0934889	"pleiotrophin (heparin binding growth factor 8, neurite growth-promoting factor 1) /// pleiotrophin (heparin binding growth factor 8, neurite growth-promoting factor 1)"
AB011087	KIAA0515	212068_s_at	1.332577426	10.58589837	0.100873	KIAA0515
AW157501	C6orf111	212179_at	1.237078828	10.58589837	0.131521	chromosome 6 open reading frame 111
AA522514	KIAA0746	212311_at	1.238879533	10.58589837	0.0855996	KIAA0746 protein
BG491842	BOP1	212563_at	0.823205677	10.58589837	0.0671723	block of proliferation 1
N32035	STX7	212632_at	1.228800722	10.58589837	0.109139	Syntaxin 7
AB002354	PLEKHM1	212717_at	1.228499151	10.58589837	0.0823402	"pleckstrin homology domain containing, family M (with RUN domain) member 1"
AU154785	LOC92249	212957_s_at	1.263436779	10.58589837	0.0861567	hypothetical protein LOC92249
AL050376	USP34	212980_at	1.28931502	10.58589837	0.120608	Ubiquitin specific peptidase 34
AI769688	ATP8A1	213106_at	1.326114891	10.58589837	0.114778	"ATPase, aminophospholipid transporter (APLT), Class I, type 8A, member 1"
AK025495	SASH1	213236_at	1.207280987	10.58589837	0.098794	SAM and SH3 domain containing 1
BE327172	---	213281_at	1.323451752	10.58589837	0.0758156	---
AL031778	C6orf130	213322_at	1.259147651	10.58589837	0.126235	chromosome 6 open reading frame 130
AW025579	---	213429_at	1.301880191	10.58589837	0.0587233	"CDNA FLJ26539 fis, clone KDN09310"
AI133353	HBG1 /// HBG2	213515_x_at	1.334695876	10.58589837	0.0944979	"hemoglobin, gamma A /// hemoglobin, gamma A /// hemoglobin, gamma G /// hemoglobin, gamma G"
AL137958	LOC388650	213689_x_at	1.244378594	10.58589837	0.0601561	Ribosomal protein L5
AW242315	PTGER3	213933_at	1.412537357	10.58589837	0.0518841	Prostaglandin E receptor 3 (subtype EP3)
AK000345	DHRS2	214079_at	0.586242692	10.58589837	0.0624101	dehydrogenase/reductase (SDR family) member 2
AI767884	ZFPL1	214310_s_at	0.801970339	10.58589837	0.0424455	zinc finger protein-like 1
NM_012081	ELL2	214446_at	0.791817533	10.58589837	0.0644822	"elongation factor, RNA polymerase II, 2"
T15991	CHRM3	214596_at	1.245529535	10.58589837	0.0639998	"cholinergic receptor, muscarinic 3"
BE676209	MGC13098 /// POLR2J2 /// POLR2J3	214740_at	1.317482048	10.58589837	0.112233	hypothetical protein MGC13098 /// DNA directed RNA polymerase II polypeptide J-related gene /// RPB11b2alpha protein
AI278204	---	214807_at	1.338437723	10.58589837	0.0717542	MRNA; cDNA DKFZp564O0862 (from clone DKFZp564O0862)
X56687	UBTF	214881_s_at	0.735997673	10.58589837	0.0507472	"upstream binding transcription factor, RNA polymerase I"
AL049263	PSPC1	215083_at	1.255262397	10.58589837	0.0842843	Paraspeckle component 1
AF038194	HRPT2	215398_at	1.359059634	10.58589837	0.0893938	"Cell division cycle 73, Paf1/RNA polymerase II complex component, homolog (S. cerevisiae)"
AW182303	C19orf36	215734_at	1.279705754	10.58589837	0.109094	chromosome 19 open reading frame 36
AK021879	TTLL5	215898_at	1.200905487	10.58589837	0.0666942	"tubulin tyrosine ligase-like family, member 5"
AF070547	---	215972_at	1.441832034	10.58589837	0.0665421	Clone 24820 mRNA sequence
AK025323	WASL	216094_at	1.310959741	10.58589837	0.0617925	Wiskott-Aldrich syndrome-like
AL133269	---	216475_at	0.63443163	10.58589837	0.0395794	---
D00267	---	217206_at	0.53858022	10.58589837	0.0216748	---
AL031313	EIF3S1	217364_x_at	0.689988476	10.58589837	0.0540142	"eukaryotic translation initiation factor 3, subunit 1 alpha, 35kDa"
AA721025	---	217540_at	1.616237842	10.58589837	0.0922404	"Transcribed locus, weakly similar to XP_510104.1 PREDICTED: similar to hypothetical protein FLJ25224 [Pan troglodytes]"
BF308250	ZNF675	217547_x_at	0.783896545	10.58589837	0.0483821	zinc finger protein 675
R25692	---	217637_at	1.376350866	10.58589837	0.0440447	"CDNA FLJ45029 fis, clone BRAWH3018326"
NM_024299	C20orf149	218010_x_at	0.822367907	10.58589837	0.0534695	chromosome 20 open reading frame 149
NM_012140	SLC25A10	218275_at	0.80197412	10.58589837	0.0561558	"solute carrier family 25 (mitochondrial carrier; dicarboxylate transporter), member 10"
NM_022737	LPPR2	218509_at	1.229958945	10.58589837	0.0964021	lipid phosphate phosphatase-related protein type 2
NM_005461	MAFB	218559_s_at	1.443502697	10.58589837	0.137489	v-maf musculoaponeurotic fibrosarcoma oncogene homolog B (avian)
NM_023007	JMJD4	218560_s_at	0.811680078	10.58589837	0.0387232	jumonji domain containing 4
NM_005767	P2RY5	218589_at	1.756076827	10.58589837	0.0327116	"purinergic receptor P2Y, G-protein coupled, 5"
NM_019103	ZMAT5	218752_at	1.297839436	10.58589837	0.0989803	"zinc finger, matrin type 5"
NM_025135	FHOD3	218980_at	1.422733674	10.58589837	0.110329	formin homology 2 domain containing 3
NM_020186	ACN9	218981_at	0.734558381	10.58589837	0.0431746	ACN9 homolog (S. cerevisiae)
NM_022894	PAPOLG	219160_s_at	1.374654659	10.58589837	0.0521463	poly(A) polymerase gamma
NM_022900	NBLA04196	219342_at	1.220077188	10.58589837	0.0938279	putative protein product of Nbla04196
NM_022167	XYLT2	219401_at	1.252439031	10.58589837	0.0839957	xylosyltransferase II
NM_024937	LRP12	219631_at	1.210509366	10.58589837	0.0765812	low density lipoprotein-related protein 12
NM_017702	FLJ20186	219646_at	0.781456018	10.58589837	0.0612585	hypothetical protein FLJ20186
NM_024754	PTCD2	219658_at	1.645803373	10.58589837	0.0706623	pentatricopeptide repeat domain 2
NM_017412	FZD3	219683_at	1.21108657	10.58589837	0.096285	frizzled homolog 3 (Drosophila)
NM_017694	FLJ20160	219858_s_at	1.290393876	10.58589837	0.0626137	FLJ20160 protein
NM_013381	TRHDE	219937_at	1.25689397	10.58589837	0.0899498	thyrotropin-releasing hormone degrading enzyme
NM_024692	RSNL2	219944_at	1.432082487	10.58589837	0.0662764	restin-like 2
NM_016089	ZNF589	219968_at	1.222250868	10.58589837	0.073358	zinc finger protein 589
NM_015590	GPATC4	220596_at	1.545109371	10.58589837	0.118079	G patch domain containing 4
NM_004361	CDH7	220679_s_at	1.539794153	10.58589837	0.0970512	"cadherin 7, type 2"
NM_025117	---	220914_at	1.467784469	10.58589837	0.0844258	MRNA similar to hypothetical protein FLJ11871 (cDNA clone IMAGE:6160816)
BC002752	PTD015	221600_s_at	0.702083086	10.58589837	0.0418349	PTD015 protein
AW246673	FAM46A	221766_s_at	1.38572096	10.58589837	0.112703	"family with sequence similarity 46, member A"
BF062886	VRK3	221998_s_at	1.215054233	10.58589837	0.13434	vaccinia related kinase 3
AI982754	CLU	222043_at	0.741757069	10.58589837	0.0289694	"clusterin (complement lysis inhibitor, SP-40,40, sulfated glycoprotein 2, testosterone-repressed prostate message 2, apolipoprotein J)"
AW002578	MGC3731	222057_at	1.273333341	10.58589837	0.105394	hypothetical protein MGC3731
AW194818	RNF130	222058_at	1.355646563	10.58589837	0.0640456	ring finger protein 130
D87470	KIAA0280	36612_at	1.262011222	10.58589837	0.0700103	KIAA0280 protein
AI003763	FLJ12681	46142_at	1.365622213	10.58589837	0.0668237	hypothetical protein FLJ12681
NM_002004	FDPS	201275_at	1.240230909	12.77308656	0.134383	"farnesyl diphosphate synthase (farnesyl pyrophosphate synthetase, dimethylallyltranstransferase, geranyltranstransferase)"
NM_030579	CYB5-M	201634_s_at	0.817409508	12.77308656	0.0632173	outer mitochondrial membrane cytochrome b5
NM_001360	DHCR7	201791_s_at	1.224147725	12.77308656	0.148421	7-dehydrocholesterol reductase
NM_005827	SLC35B1	202433_at	0.782589872	12.77308656	0.075652	"solute carrier family 35, member B1"
AU144855	CYP1B1	202436_s_at	0.801345975	12.77308656	0.0465349	"cytochrome P450, family 1, subfamily B, polypeptide 1"
NM_014952	BAHD1	203051_at	1.32405453	12.77308656	0.104629	bromo adjacent homology domain containing 1
BF439282	RAPGEF2	203096_s_at	0.797972728	12.77308656	0.0518749	Rap guanine nucleotide exchange factor (GEF) 2
AW103265	MGAT2	203101_s_at	1.214037262	12.77308656	0.107419	"mannosyl (alpha-1,6-)-glycoprotein beta-1,2-N-acetylglucosaminyltransferase"
NM_004522	KIF5C	203130_s_at	1.302954055	12.77308656	0.153033	kinesin family member 5C
NM_005834	TIMM17B	203342_at	0.775698943	12.77308656	0.073786	translocase of inner mitochondrial membrane 17 homolog B (yeast)
BF060791	ETV5	203348_s_at	1.429593364	12.77308656	0.107077	ets variant gene 5 (ets-related molecule)
NM_001425	EMP3	203729_at	1.319285322	12.77308656	0.112115	epithelial membrane protein 3
NM_001992	F2R	203989_x_at	1.553406386	12.77308656	0.102791	coagulation factor II (thrombin) receptor
NM_021140	UTX	203991_s_at	1.29433582	12.77308656	0.0962153	"ubiquitously transcribed tetratricopeptide repeat, X chromosome"
NM_001408	CELSR2	204029_at	1.201394218	12.77308656	0.107134	"cadherin, EGF LAG seven-pass G-type receptor 2 (flamingo homolog, Drosophila)"
NM_006517	SLC16A2	204462_s_at	1.295103398	12.77308656	0.105071	"solute carrier family 16 (monocarboxylic acid transporters), member 2"
NM_004961	GABRE	204537_s_at	1.864863946	12.77308656	0.151781	"gamma-aminobutyric acid (GABA) A receptor, epsilon"
NM_003458	BSN	204586_at	1.315995874	12.77308656	0.121909	bassoon (presynaptic cytomatrix protein)
NM_000110	DPYD	204646_at	1.269154792	12.77308656	0.112997	dihydropyrimidine dehydrogenase
NM_014262	LEPREL2	204854_at	0.709070051	12.77308656	0.0538052	leprecan-like 2
NM_001953	ECGF1	204858_s_at	0.813934309	12.77308656	0.0552473	endothelial cell growth factor 1 (platelet-derived)
NM_006697	MTMR11	205076_s_at	1.250872324	12.77308656	0.139462	myotubularin related protein 11
NM_003941	WASL	205810_s_at	1.202895806	12.77308656	0.137481	Wiskott-Aldrich syndrome-like
NM_002130	HMGCS1	205822_s_at	1.320665111	12.77308656	0.14105	3-hydroxy-3-methylglutaryl-Coenzyme A synthase 1 (soluble)
NM_005224	ARID3A	205865_at	1.371767658	12.77308656	0.10846	AT rich interactive domain 3A (BRIGHT- like)
NM_002131	HMGA1	206074_s_at	1.249292413	12.77308656	0.113626	high mobility group AT-hook 1
NM_003468	FZD5	206136_at	0.756188545	12.77308656	0.0439776	frizzled homolog 5 (Drosophila)
NM_001817	CEACAM4	207205_at	0.681648051	12.77308656	0.0414829	carcinoembryonic antigen-related cell adhesion molecule 4
NM_003718	CDC2L5	207319_s_at	1.212736188	12.77308656	0.110465	cell division cycle 2-like 5 (cholinesterase-related cell division controller)
NM_020322	ACCN3	207561_s_at	1.300039659	12.77308656	0.102909	amiloride-sensitive cation channel 3
NM_014125	POLQ	207746_at	0.767212805	12.77308656	0.0551589	"polymerase (DNA directed), theta"
NM_004509	SP110	208012_x_at	1.20624136	12.77308656	0.10333	SP110 nuclear body protein
NM_006238	PPARD	208044_s_at	1.226742788	12.77308656	0.0641318	"peroxisome proliferative activated receptor, delta"
NM_001476	GAGE4 /// GAGE5 /// GAGE6 /// GAGE7B	208155_x_at	0.657522121	12.77308656	0.0371521	G antigen 4 /// G antigen 5 /// G antigen 6 /// G antigen 7B
NM_003894	PER2	208518_s_at	1.221434244	12.77308656	0.0846607	period homolog 2 (Drosophila)
BC005247	IDI1	208881_x_at	1.30433465	12.77308656	0.134872	isopentenyl-diphosphate delta isomerase 1
BC003143	DUSP6	208891_at	1.323385371	12.77308656	0.135217	dual specificity phosphatase 6
L42024	HLA-B	209140_x_at	1.447552715	12.77308656	0.151535	"major histocompatibility complex, class I, B"
BC000245	NSDHL	209279_s_at	1.205945581	12.77308656	0.118315	NAD(P) dependent steroid dehydrogenase-like
BC001060	PAX8	209552_at	0.820635884	12.77308656	0.0510122	paired box gene 8
BC001387	HRASLS3	209581_at	0.82761771	12.77308656	0.0636821	HRAS-like suppressor 3
AF213033	CDKN3	209714_s_at	0.808798453	12.77308656	0.0718916	cyclin-dependent kinase inhibitor 3 (CDK2-associated dual specificity phosphatase)
AA761181	CD24	209771_x_at	1.456687408	12.77308656	0.163177	CD24 antigen (small cell lung carcinoma cluster 4 antigen)
U30884	SFRS5	210077_s_at	1.269287236	12.77308656	0.110173	"splicing factor, arginine/serine-rich 5"
AF327657	ABCA2	210100_s_at	1.272536261	12.77308656	0.129892	"ATP-binding cassette, sub-family A (ABC1), member 2"
AF031469	MR1	210224_at	1.235352781	12.77308656	0.0996051	"major histocompatibility complex, class I-related"
AF080216	BCL11A	210347_s_at	1.226436744	12.77308656	0.0767675	B-cell CLL/lymphoma 11A (zinc finger protein)
D85939	CFDP1	210701_at	1.26396451	12.77308656	0.114537	craniofacial development protein 1
Z25434	NEK3	211089_s_at	0.564037911	12.77308656	0.0552302	NIMA (never in mitosis gene a)-related kinase 3 /// NIMA (never in mitosis gene a)-related kinase 3
AF116616	SCD	211162_x_at	1.232581473	12.77308656	0.141715	stearoyl-CoA desaturase (delta-9-desaturase)
AB004818	EZH1	211310_at	1.576741721	12.77308656	0.05309	enhancer of zeste homolog 1 (Drosophila)
U65065	PTPRN2	211534_x_at	1.449811517	12.77308656	0.140428	"protein tyrosine phosphatase, receptor type, N polypeptide 2"
AF248734	APAF1	211553_x_at	0.739892656	12.77308656	0.0365548	apoptotic peptidase activating factor
U01351	NR3C1	211671_s_at	1.211719119	12.77308656	0.128288	"nuclear receptor subfamily 3, group C, member 1 (glucocorticoid receptor) /// nuclear receptor subfamily 3, group C, member 1 (glucocorticoid receptor)"
AL121895	EPB41L1	212339_at	1.279518626	12.77308656	0.113901	erythrocyte membrane protein band 4.1-like 1
AK026392	MXD4	212346_s_at	1.312041937	12.77308656	0.118733	MAX dimerization protein 4
AW139179	FEM1B	212373_at	0.806899163	12.77308656	0.0643417	fem-1 homolog b (C. elegans)
AU158495	NOTCH2	212377_s_at	1.207818449	12.77308656	0.136729	Notch homolog 2 (Drosophila)
BE965029	MICAL2	212472_at	0.767654128	12.77308656	0.040249	"microtubule associated monoxygenase, calponin and LIM domain containing 2"
AK026529	TBL2	212679_at	1.432628629	12.77308656	0.0776893	transducin (beta)-like 2
BF570210	PNPLA2	212705_x_at	1.201353551	12.77308656	0.119803	patatin-like phospholipase domain containing 2
AB014562	PHF2	212726_at	1.22230927	12.77308656	0.144571	PHD finger protein 2
AL523860	NME4	212739_s_at	1.259802834	12.77308656	0.117007	"non-metastatic cells 4, protein expressed in"
AU150943	C10orf38	212771_at	1.249085425	12.77308656	0.123627	chromosome 10 open reading frame 38
AB002319	ZFYVE26	213073_at	1.250851304	12.77308656	0.123136	"zinc finger, FYVE domain containing 26"
N30342	KIAA0339	213202_at	1.364526656	12.77308656	0.107288	KIAA0339 gene product
AI478147	ATP10D	213238_at	1.475116283	12.77308656	0.147044	"ATPase, Class V, type 10D"
AW025150	PCBP2	213263_s_at	1.203123894	12.77308656	0.138912	Poly(rC) binding protein 2
AA129716	PVRL3	213325_at	0.79706238	12.77308656	0.0401229	poliovirus receptor-related 3
AI733465	COL9A2	213622_at	1.252425913	12.77308656	0.118427	"collagen, type IX, alpha 2"
AW243128	DHRS7	213868_s_at	1.380859064	12.77308656	0.0883157	Dehydrogenase/reductase (SDR family) member 7
AL533838	TUBB-PARALOG	214023_x_at	1.235291908	12.77308656	0.129193	"tubulin, beta polypeptide paralog"
AI767414	BTD	214116_at	1.45161424	12.77308656	0.135364	biotinidase
AI051476	---	214139_at	1.387508004	12.77308656	0.115569	---
AW188201	ACACA	214358_at	0.774775592	12.77308656	0.0516738	acetyl-Coenzyme A carboxylase alpha
M12679	HLA-C	214459_x_at	1.407284403	12.77308656	0.159856	"major histocompatibility complex, class I, C"
AA554430	KIAA1856	214964_at	1.243419172	12.77308656	0.115676	KIAA1856 protein
AI267546	---	215056_at	1.272098932	12.77308656	0.0745119	"CDNA FLJ42813 fis, clone BRCAN2012355"
AU147402	CALD1	215198_s_at	1.205180962	12.77308656	0.106273	caldesmon 1
AU147830	---	215376_at	1.21590702	12.77308656	0.0968067	"CDNA FLJ12295 fis, clone MAMMA1001818"
AU146580	TCF12	215611_at	1.431665605	12.77308656	0.0987427	"transcription factor 12 (HTF4, helix-loop-helix transcription factors 4)"
AJ003062	TUBGCP3	215739_s_at	0.82032967	12.77308656	0.0541711	"tubulin, gamma complex associated protein 3"
AK026889	APRIN	215888_at	1.254046932	12.77308656	0.0984396	Androgen-induced proliferation inhibitor
AK000168	CD24	216379_x_at	1.490280276	12.77308656	0.162442	CD24 antigen (small cell lung carcinoma cluster 4 antigen)
AF032454	---	216561_x_at	2.137805806	12.77308656	0.0606355	---
AC007182	C14orf1	217188_s_at	1.205168388	12.77308656	0.130479	chromosome 14 open reading frame 1
AA070330	---	217647_at	1.442032799	12.77308656	0.096424	"CDNA FLJ40920 fis, clone UTERU2005905"
AA479678	---	217712_at	1.289911706	12.77308656	0.0576669	Similar to Serine/threonine-protein kinase PRKX (Protein kinase PKX1)
NM_020245	TULP4	218184_at	1.221860506	12.77308656	0.139477	tubby like protein 4
NM_018490	LGR4	218326_s_at	1.254125978	12.77308656	0.0984679	leucine-rich repeat-containing G protein-coupled receptor 4
NM_022766	CERK	218421_at	1.262334679	12.77308656	0.0997189	ceramide kinase
NM_014112	TRPS1	218502_s_at	1.207189444	12.77308656	0.141185	trichorhinophalangeal syndrome I
NM_018343	RIOK2	218535_s_at	0.816042347	12.77308656	0.0603402	RIO kinase 2 (yeast)
NM_014109	ATAD2	218782_s_at	0.822894694	12.77308656	0.0780502	"ATPase family, AAA domain containing 2"
NM_024897	PAQR6	219236_at	1.300629618	12.77308656	0.143179	progestin and adipoQ receptor family member VI
NM_024582	FAT4	219427_at	1.441500915	12.77308656	0.0921498	FAT tumor suppressor homolog 4 (Drosophila)
NM_024745	SHCBP1	219493_at	0.773340721	12.77308656	0.0756604	SHC SH2-domain binding protein 1
NM_000076	CDKN1C	219534_x_at	1.282390953	12.77308656	0.144046	"cyclin-dependent kinase inhibitor 1C (p57, Kip2)"
NM_020674	CYP20A1	219565_at	0.813841962	12.77308656	0.0626327	"cytochrome P450, family 20, subfamily A, polypeptide 1"
NM_022470	WIG1	219628_at	1.247035912	12.77308656	0.120865	p53 target zinc finger protein
NM_024857	C17orf41	220223_at	0.795878456	12.77308656	0.0585016	chromosome 17 open reading frame 41
NM_018028	FLJ10211	220457_at	1.31874689	12.77308656	0.113531	hypothetical protein FLJ10211
NM_024715	C5orf14	220495_s_at	0.831756498	12.77308656	0.0614649	chromosome 5 open reading frame 14
NM_018518	MCM10	220651_s_at	0.820683072	12.77308656	0.0755057	MCM10 minichromosome maintenance deficient 10 (S. cerevisiae)
NM_018470	C10orf110	220703_at	1.403305478	12.77308656	0.112241	chromosome 10 open reading frame 110
NM_031244	SIRT5	221010_s_at	1.43838445	12.77308656	0.0952271	sirtuin (silent mating type information regulation 2 homolog) 5 (S. cerevisiae) /// sirtuin (silent mating type information regulation 2 homolog) 5 (S. cerevisiae)
NM_031283	TCF7L1	221016_s_at	1.291029561	12.77308656	0.0801653	"transcription factor 7-like 1 (T-cell specific, HMG-box) /// transcription factor 7-like 1 (T-cell specific, HMG-box)"
NM_022658	HOXC8	221350_at	1.434293253	12.77308656	0.10159	homeo box C8
NM_002548	OR1D2	221464_at	0.696280038	12.77308656	0.0350959	"olfactory receptor, family 1, subfamily D, member 2"
AF239798	MAP3K2	221695_s_at	1.304931708	12.77308656	0.0905124	mitogen-activated protein kinase kinase kinase 2 /// mitogen-activated protein kinase kinase kinase 2
AA775177	PTPRE	221840_at	1.278299437	12.77308656	0.0646928	"protein tyrosine phosphatase, receptor type, E"
AA443762	GNB2L1	222034_at	1.231118334	12.77308656	0.128787	"Guanine nucleotide binding protein (G protein), beta polypeptide 2-like 1"
AW188134	RANBP9	222081_at	0.734057832	12.77308656	0.0536944	RAN binding protein 9
AW972855	---	222315_at	1.301737559	12.77308656	0.122944	"Transcribed locus, weakly similar to XP_518244.1 PREDICTED: similar to sirtuin 5 isoform 2; sir2-like 5; silent mating type information regulation 2, S.cerevisiae, homolog 5; sirtuin (silent mating type information regulation 2, S.cerevisiae, homolog) 5;
AW972351	---	222368_at	1.304472554	12.77308656	0.123042	"CDNA FLJ39459 fis, clone PROST2011439"
AW003512	ALOXE3	222383_s_at	0.698497108	12.77308656	0.0318614	arachidonate lipoxygenase 3
U85995	PTHB1	37547_at	1.434234098	12.77308656	0.0836278	parathyroid hormone-responsive B1
AA485440	SPHK2	40273_at	1.456707083	12.77308656	0.136787	sphingosine kinase 2
AI201594	---	43511_s_at	1.26325709	12.77308656	0.123248	MRNA; cDNA DKFZp762M127 (from clone DKFZp762M127)
L42374	PPP2R5B	635_s_at	1.246099218	12.77308656	0.0870793	"protein phosphatase 2, regulatory subunit B (B56), beta isoform"
NM_004862	LITAF	200706_s_at	1.266528652	14.90280441	0.14811	lipopolysaccharide-induced TNF factor
NM_004417	DUSP1	201041_s_at	1.266940511	14.90280441	0.167861	dual specificity phosphatase 1
M81635	STOM	201061_s_at	1.26433479	14.90280441	0.204066	stomatin
J03068	OIP106	201283_s_at	1.30838479	14.90280441	0.0930657	OGT(O-Glc-NAc transferase)-interacting protein 106 KDa
AI806665	SEC63	201915_at	1.309578343	14.90280441	0.160646	SEC63-like (S. cerevisiae)
K01228	COL1A1	202310_s_at	1.496912612	14.90280441	0.147545	"collagen, type I, alpha 1"
AB007935	IGSF3	202421_at	1.308196757	14.90280441	0.109773	"immunoglobulin superfamily, member 3"
NM_002716	PPP2R1B	202884_s_at	0.805751009	14.90280441	0.0931092	"protein phosphatase 2 (formerly 2A), regulatory subunit A (PR 65), beta isoform"
AI189359	MVD	203027_s_at	1.325677177	14.90280441	0.195651	mevalonate (diphospho) decarboxylase
NM_014751	MTSS1	203037_s_at	1.287170343	14.90280441	0.194347	metastasis suppressor 1
NM_004703	RABEP1	203223_at	0.820853873	14.90280441	0.0546103	"rabaptin, RAB GTPase binding effector protein 1"
NM_005822	DSCR1L1	203498_at	1.618132836	14.90280441	0.196866	Down syndrome critical region gene 1-like 1
NM_003507	FZD7	203706_s_at	1.250497405	14.90280441	0.110911	frizzled homolog 7 (Drosophila)
AV729484	CTSO	203758_at	0.797113678	14.90280441	0.0717427	cathepsin O
NM_000351	STS	203769_s_at	1.295876021	14.90280441	0.146368	"steroid sulfatase (microsomal), arylsulfatase C, isozyme S"
AA740186	BLVRA	203771_s_at	0.830774653	14.90280441	0.0912789	biliverdin reductase A
NM_014925	KIAA1002	203831_at	1.237723313	14.90280441	0.187772	KIAA1002 protein
U75667	ARG2	203946_s_at	1.347452264	14.90280441	0.186047	"arginase, type II"
NM_014840	NUAK1	204589_at	1.257698406	14.90280441	0.142444	"NUAK family, SNF1-like kinase, 1"
NM_004289	NFE2L3	204702_s_at	1.358293557	14.90280441	0.175672	nuclear factor (erythroid-derived 2)-like 3
NM_014791	MELK	204825_at	0.814391222	14.90280441	0.0950318	maternal embryonic leucine zipper kinase
BE856546	IL6ST	204863_s_at	0.692441072	14.90280441	0.0798006	"interleukin 6 signal transducer (gp130, oncostatin M receptor)"
AA988241	RAB3A	204974_at	1.279060501	14.90280441	0.159806	"RAB3A, member RAS oncogene family"
NM_002073	GNAZ	204993_at	1.346307722	14.90280441	0.185726	"guanine nucleotide binding protein (G protein), alpha z polypeptide"
NM_001446	FABP7	205029_s_at	0.684255309	14.90280441	0.0461804	"fatty acid binding protein 7, brain"
NM_000203	IDUA	205059_s_at	1.288968388	14.90280441	0.149245	"iduronidase, alpha-L-"
NM_004085	TIMM8A	205217_at	0.818469514	14.90280441	0.0662519	translocase of inner mitochondrial membrane 8 homolog A (yeast)
NM_004696	SLC16A4	205234_at	1.309324552	14.90280441	0.139538	"solute carrier family 16 (monocarboxylic acid transporters), member 4"
NM_006608	PHTF1	205702_at	1.202026778	14.90280441	0.147103	putative homeodomain transcription factor 1
AL137351	ANKRD26	205705_at	0.621414302	14.90280441	0.0420473	ankyrin repeat domain 26
NM_015596	KLK13	205783_at	1.408340619	14.90280441	0.157279	kallikrein 13
NM_000706	AVPR1A	206251_s_at	1.220504036	14.90280441	0.13833	arginine vasopressin receptor 1A
NM_018651	ZNF167	206314_at	1.517366905	14.90280441	0.108802	zinc finger protein 167
NM_005242	F2RL1	206429_at	1.304278077	14.90280441	0.192247	coagulation factor II (thrombin) receptor-like 1
NM_001478	GALGT	206435_at	1.20938693	14.90280441	0.0952395	UDP-N-acetyl-alpha-D-galactosamine:(N-acetylneuraminyl)-galactosylglucosylceramide N-acetylgalactosaminyltransferase (GalNAc-T)
AF332197	SIX2	206510_at	1.424715137	14.90280441	0.178674	sine oculis homeobox homolog 2 (Drosophila)
NM_003112	SP4	206663_at	1.248215787	14.90280441	0.115815	Sp4 transcription factor
NM_000421	KRT10	207023_x_at	0.830238835	14.90280441	0.0761995	keratin 10 (epidermolytic hyperkeratosis; keratosis palmaris et plantaris)
NM_001474	GAGE2 /// GAGE4 /// GAGE5 /// GAGE6 /// GAGE7 /// GAGE7B /// GAGE8	207086_x_at	1.338175238	14.90280441	0.095207	G antigen 2 /// G antigen 4 /// G antigen 5 /// G antigen 6 /// G antigen 7 /// G antigen 7B /// G antigen 8
NM_003961	RHBDL1	207383_s_at	1.204513066	14.90280441	0.118559	"rhomboid, veinlet-like 1 (Drosophila)"
NM_001076	UGT2B15	207392_x_at	1.790701677	14.90280441	0.190033	"UDP glucuronosyltransferase 2 family, polypeptide B15"
NM_002872	RAC2	207419_s_at	1.589311783	14.90280441	0.123127	"ras-related C3 botulinum toxin substrate 2 (rho family, small GTP binding protein Rac2)"
NM_000313	PROS1	207808_s_at	1.25729082	14.90280441	0.194095	protein S (alpha)
NM_020524	PBXIP1	207838_x_at	1.265610514	14.90280441	0.155844	pre-B-cell leukemia transcription factor interacting protein 1
NM_001438	ESRRG	207981_s_at	1.267627082	14.90280441	0.128996	estrogen-related receptor gamma
NM_015072	TTLL5	208099_x_at	1.281903394	14.90280441	0.122905	"tubulin tyrosine ligase-like family, member 5 /// tubulin tyrosine ligase-like family, member 5"
NM_020394	ZNF695	208273_at	0.644555418	14.90280441	0.0449565	zinc finger protein 695
AF134379	LIMK1	208372_s_at	1.331372831	14.90280441	0.142256	LIM domain kinase 1
NM_004038	AMY1A /// AMY1B /// AMY1C /// AMY2A /// AMY2B	208498_s_at	1.418071967	14.90280441	0.11372	"amylase, alpha 1A; salivary /// amylase, alpha 1B; salivary /// amylase, alpha 1C; salivary /// amylase, alpha 2A; pancreatic /// amylase, alpha 2B; pancreatic"
NM_003537	HIST1H3B	208576_s_at	1.336826497	14.90280441	0.0353307	"histone 1, H3b"
NM_006514	SCN10A	208578_at	1.57381213	14.90280441	0.105612	"sodium channel, voltage-gated, type X, alpha"
AW500473	EIF4EBP2	208769_at	0.823612227	14.90280441	0.0802489	Eukaryotic translation initiation factor 4E binding protein 2
BF125756	GABARAPL1	208868_s_at	1.328683623	14.90280441	0.139472	GABA(A) receptor-associated protein like 1
BF223718	TRIO	209011_at	1.229297729	14.90280441	0.137333	triple functional domain (PTPRF interacting)
AF068266	CBFA2T2	209145_s_at	1.384999093	14.90280441	0.1149	"core-binding factor, runt domain, alpha subunit 2; translocated to, 2"
AL136842	CDC42EP3	209288_s_at	1.247646082	14.90280441	0.166749	CDC42 effector protein (Rho GTPase binding) 3
AL565812	PTN	209465_x_at	1.386339381	14.90280441	0.157487	"pleiotrophin (heparin binding growth factor 8, neurite growth-promoting factor 1)"
AF025304	EPHB2	209589_s_at	1.614043942	14.90280441	0.172696	EPH receptor B2
AL389975	PPP2R3A	209633_at	1.36692744	14.90280441	0.182389	"protein phosphatase 2 (formerly 2A), regulatory subunit B'', alpha"
BF591163	DOK4	209690_s_at	0.755819217	14.90280441	0.0668125	docking protein 4
N80922	SLC35D1	209711_at	1.252539532	14.90280441	0.18646	"solute carrier family 35 (UDP-glucuronic acid/UDP-N-acetylgalactosamine dual transporter), member D1"
AF288389	GLT25D2	209883_at	1.218665667	14.90280441	0.136623	glycosyltransferase 25 domain containing 2
AW149405	NRXN1	209914_s_at	1.255591945	14.90280441	0.155753	neurexin 1
BC001234	LOH11CR2A	210102_at	0.627172287	14.90280441	0.0617521	"loss of heterozygosity, 11, chromosomal region 2, gene A"
AF191492	NAG8	210109_at	1.235651061	14.90280441	0.161379	nasopharyngeal carcinoma associated gene protein-8
AF022654	SHOX2	210135_s_at	1.332475874	14.90280441	0.169942	short stature homeobox 2
M77227	HGF	210998_s_at	0.755852602	14.90280441	0.088653	hepatocyte growth factor (hepapoietin A; scatter factor)
M27281	VEGF	211527_x_at	1.212801808	14.90280441	0.167508	vascular endothelial growth factor
BG253119	DST	212253_x_at	1.305811238	14.90280441	0.146323	dystonin
AL023584	HIVEP2	212642_s_at	1.250854004	14.90280441	0.162154	human immunodeficiency virus type I enhancer binding protein 2
AA284075	KNS2	212877_at	0.768740589	14.90280441	0.0819085	kinesin 2
AL043112	HIC2	212966_at	1.265139525	14.90280441	0.159277	hypermethylated in cancer 2
AI928387	CYHR1	213072_at	1.206916976	14.90280441	0.159878	cysteine/histidine-rich 1
AB032967	ZNF473	213130_at	1.214904152	14.90280441	0.174149	zinc finger protein 473
AA045174	---	213158_at	1.211538553	14.90280441	0.174598	MRNA; cDNA DKFZp586B211 (from clone DKFZp586B211)
AJ271832	PPM1B	213225_at	0.780995886	14.90280441	0.05095	"protein phosphatase 1B (formerly 2C), magnesium-dependent, beta isoform"
AB018345	KIAA0802	213358_at	1.227700913	14.90280441	0.107951	KIAA0802
AF038193	ARL3	213433_at	1.239852272	14.90280441	0.172537	ADP-ribosylation factor-like 3
AA993683	PRO1580	213550_s_at	0.759881434	14.90280441	0.0776598	hypothetical protein PRO1580
AL031186	EMID1	213779_at	1.204306165	14.90280441	0.153363	EMI domain containing 1
BE674466	ADAM23	213808_at	1.593429096	14.90280441	0.105302	ADAM metallopeptidase domain 23
AW611641	OAZ3	213863_s_at	1.230393782	14.90280441	0.074782	Ornithine decarboxylase antizyme 3
AU150186	MAC30	214283_at	1.27794636	14.90280441	0.18011	hypothetical protein MAC30
NM_003532	HIST1H3E	214616_at	1.353681189	14.90280441	0.141591	"histone 1, H3e"
BF038548	PAM	214620_x_at	1.274004988	14.90280441	0.0994976	peptidylglycine alpha-amidating monooxygenase
AW139448	N4BP3	214775_at	1.22379416	14.90280441	0.103552	Nedd4 binding protein 3
AK026484	SPTAN1	214925_s_at	1.321677059	14.90280441	0.102524	"spectrin, alpha, non-erythrocytic 1 (alpha-fodrin)"
AB018275	C17orf31	214940_s_at	1.253560466	14.90280441	0.122294	chromosome 17 open reading frame 31
AF052146	FLJ11127	214947_at	1.696379582	14.90280441	0.111283	Hypothetical protein FLJ11127
AL353759	HIST1H2AC	215071_s_at	1.584320174	14.90280441	0.175936	"histone 1, H2ac"
AL137508	ARHGEF10	215139_at	1.388602199	14.90280441	0.0679479	Rho guanine nucleotide exchange factor (GEF) 10
AC004221	C19orf26	215325_x_at	1.217174781	14.90280441	0.0801936	chromosome 19 open reading frame 26
AU145394	---	215370_at	1.207136008	14.90280441	0.136018	Similar to KIAA0160 gene product is novel
AA905286	DLEU2 /// BCMSUNL	215629_s_at	0.637435299	14.90280441	0.0648349	"deleted in lymphocytic leukemia, 2 /// BCMS upstream neighbor-like"
R94644	CSPG2	215646_s_at	0.530477324	14.90280441	0.0422078	chondroitin sulfate proteoglycan 2 (versican) /// chondroitin sulfate proteoglycan 2 (versican)
AL050065	HRMT1L1	216069_at	1.472824382	14.90280441	0.138185	HMT1 hnRNP methyltransferase-like 1 (S. cerevisiae)
AU147017	---	216110_x_at	1.432686651	14.90280441	0.0817152	"CDNA FLJ14080 fis, clone HEMBB1002152"
AK001538	WDHD1	216228_s_at	0.794987164	14.90280441	0.0621343	WD repeat and HMG-box DNA binding protein 1
AK022610	PLCL3	216633_s_at	1.415559077	14.90280441	0.10846	phospholipase C-like 3
D64137	CDKN1C	216894_x_at	1.264743945	14.90280441	0.178208	"cyclin-dependent kinase inhibitor 1C (p57, Kip2)"
AJ236922	GRM8	216992_s_at	1.245700179	14.90280441	0.145321	"glutamate receptor, metabotropic 8"
AL109714	LOC400410	217104_at	1.298868357	14.90280441	0.128065	similar to cervical cancer suppressor-1
X69909	---	217368_at	1.311072505	14.90280441	0.143369	---
AW301806	ARL6IP2	217580_x_at	0.777877809	14.90280441	0.0427745	ADP-ribosylation factor-like 6 interacting protein 2
BF725121	SKIL	217591_at	1.283490209	14.90280441	0.15919	SKI-like
AI086530	---	217604_at	1.246445343	14.90280441	0.142629	"Transcribed locus, moderately similar to XP_510104.1 PREDICTED: similar to hypothetical protein FLJ25224 [Pan troglodytes]"
NM_006035	CDC42BPB	217849_s_at	1.331198132	14.90280441	0.177941	CDC42 binding protein kinase beta (DMPK-like)
NM_016274	CKIP-1	218223_s_at	1.241818934	14.90280441	0.14162	CK2 interacting protein 1; HQ0024c protein
NM_005813	PRKD3	218236_s_at	1.21219134	14.90280441	0.170344	protein kinase D3
NM_012456	TIMM10	218408_at	0.8244233	14.90280441	0.0795547	translocase of inner mitochondrial membrane 10 homolog (yeast)
NM_005706	TSSC4	218612_s_at	0.805381885	14.90280441	0.0930543	tumor suppressing subtransferable candidate 4
NM_017648	MUC13	218687_s_at	1.464708552	14.90280441	0.175263	"mucin 13, epithelial transmembrane"
NM_017899	TSC	218872_at	0.799577699	14.90280441	0.0620522	hypothetical protein FLJ20607
NM_018259	TTC17	218972_at	1.21636255	14.90280441	0.188528	tetratricopeptide repeat domain 17
NM_024714	---	219154_at	1.215709903	14.90280441	0.156749	Hypothetical LOC144404
NM_018132	C6orf139	219294_at	0.827334703	14.90280441	0.0788848	chromosome 6 open reading frame 139
NM_020381	C6orf210	219307_at	1.203126024	14.90280441	0.157555	chromosome 6 open reading frame 210
NM_017912	HERC6	219352_at	1.318985134	14.90280441	0.131591	hect domain and RLD 6
NM_024507	KREMEN2	219692_at	0.820337927	14.90280441	0.0853477	kringle containing transmembrane protein 2
NM_018977	NLGN3	219726_at	1.771429081	14.90280441	0.127397	neuroligin 3
NM_004294	MTRF1	219822_at	1.25213976	14.90280441	0.127439	mitochondrial translational release factor 1
NM_024772	ZMYM1	220206_at	0.826681952	14.90280441	0.0645526	"zinc finger, MYM-type 1"
NM_018260	ZNF701	220242_x_at	0.726010821	14.90280441	0.0588521	zinc finger protein 701
NM_012419	RGS17	220334_at	1.308829526	14.90280441	0.119373	regulator of G-protein signalling 17
NM_018627	CAMSAP1	220409_at	1.309239798	14.90280441	0.100181	calmodulin regulated spectrin-associated protein 1
NM_017681	FLJ20130	220520_s_at	0.809786406	14.90280441	0.0777738	hypothetical protein FLJ20130
NM_024114	TRIM48	220534_at	1.410746758	14.90280441	0.0965649	tripartite motif-containing 48
NM_012118	CCRN4L	220671_at	0.738658	14.90280441	0.0596641	CCR4 carbon catabolite repression 4-like (S. cerevisiae)
NM_016109	ANGPTL4	221009_s_at	0.787750747	14.90280441	0.0898697	angiopoietin-like 4
NM_021651	---	221071_at	1.310868229	14.90280441	0.115099	---
NM_023922	TAS2R14	221391_at	1.385623677	14.90280441	0.117308	"taste receptor, type 2, member 14"
BC000794	PRPF18	221546_at	1.431035978	14.90280441	0.126519	PRP18 pre-mRNA processing factor 18 homolog (yeast)
BC001663	TBC1D8	221592_at	1.38604744	14.90280441	0.17045	"TBC1 domain family, member 8 (with GRAM domain)"
BF062886	VRK3	221999_at	1.258243747	14.90280441	0.170286	vaccinia related kinase 3
AW007185	HKE2	222019_at	0.73581359	14.90280441	0.0760613	HLA class II region expressed gene KE2
AI199589	C20orf67	222045_s_at	0.811404907	14.90280441	0.0722562	chromosome 20 open reading frame 67
AK022459	CCPG1	222156_x_at	1.30120225	14.90280441	0.117546	cell cycle progression 1
AI732802	PIAS1	222371_at	1.203336288	14.90280441	0.161095	"Protein inhibitor of activated STAT, 1"
AL049942	ZNF337	37860_at	1.271714099	14.90280441	0.158826	zinc finger protein 337
X59350	MAG	38521_at	1.259918338	14.90280441	0.140608	myelin associated glycoprotein
W19668	FLJ22222	64438_at	0.755391515	14.90280441	0.0770843	hypothetical protein FLJ22222
AU157932	KIAA0992	200907_s_at	1.335361357	17.43748639	0.199192	palladin
BG339064	BTG2	201235_s_at	1.235707245	17.43748639	0.179739	"BTG family, member 2"
AB028991	NUDCD3	201269_s_at	1.25585087	17.43748639	0.134451	NudC domain containing 3
AF138300	DCN	201893_x_at	1.298638842	17.43748639	0.210405	decorin
NM_005065	SEL1L	202062_s_at	0.813576785	17.43748639	0.09779	sel-1 suppressor of lin-12-like (C. elegans)
NM_003528	HIST2H2BE	202708_s_at	1.33724851	17.43748639	0.240333	"histone 2, H2be"
M96577	E2F1	2028_s_at	0.827352921	17.43748639	0.0866878	E2F transcription factor 1
NM_001255	CDC20	202870_s_at	0.811883164	17.43748639	0.100832	CDC20 cell division cycle 20 homolog (S. cerevisiae)
NM_002847	PTPRN2	203029_s_at	1.356979203	17.43748639	0.240887	"protein tyrosine phosphatase, receptor type, N polypeptide 2"
NM_007166	PICALM	203134_at	1.353406475	17.43748639	0.204814	phosphatidylinositol binding clathrin assembly protein
AL520102	KCNAB2	203402_at	1.206055596	17.43748639	0.162112	"potassium voltage-gated channel, shaker-related subfamily, beta member 2"
NM_001792	CDH2	203441_s_at	1.36511484	17.43748639	0.177278	"cadherin 2, type 1, N-cadherin (neuronal)"
NM_005103	FEZ1	203562_at	1.282142469	17.43748639	0.201451	fasciculation and elongation protein zeta 1 (zygin I)
NM_000381	MID1	203637_s_at	1.216369949	17.43748639	0.151899	midline 1 (Opitz/BBB syndrome)
AI962897	SEMA3C	203788_s_at	0.804611456	17.43748639	0.0821355	"sema domain, immunoglobulin domain (Ig), short basic domain, secreted, (semaphorin) 3C"
NM_003069	SMARCA1	203874_s_at	0.755202394	17.43748639	0.0972589	"SWI/SNF related, matrix associated, actin dependent regulator of chromatin, subfamily a, member 1"
AA044154	KIAA0999	204156_at	1.26003054	17.43748639	0.146895	KIAA0999 protein
NM_006037	HDAC4	204225_at	1.349302337	17.43748639	0.175674	histone deacetylase 4
NM_014800	ELMO1	204513_s_at	1.366191303	17.43748639	0.217502	"engulfment and cell motility 1 (ced-12 homolog, C. elegans)"
NM_004538	NAP1L3	204749_at	0.77785521	17.43748639	0.073257	nucleosome assembly protein 1-like 3
NM_005197	CHES1	205022_s_at	1.272094009	17.43748639	0.217986	checkpoint suppressor 1
NM_001790	CDC25C	205167_s_at	0.821439406	17.43748639	0.0905854	cell division cycle 25C
NM_017450	BAIAP2	205294_at	0.764493919	17.43748639	0.0913875	BAI1-associated protein 2
NM_016820	OGG1	205301_s_at	0.744460425	17.43748639	0.0694326	8-oxoguanine DNA glycosylase
NM_004467	FGL1	205305_at	1.712928444	17.43748639	0.253025	fibrinogen-like 1
NM_006574	CSPG5	205344_at	1.200936344	17.43748639	0.203593	chondroitin sulfate proteoglycan 5 (neuroglycan C)
NM_015642	ZBTB20	205383_s_at	1.216102639	17.43748639	0.242078	zinc finger and BTB domain containing 20
NM_005649	ZNF354A	205427_at	1.205744857	17.43748639	0.182787	zinc finger protein 354A
NM_000540	RYR1	205485_at	1.494618854	17.43748639	0.184937	ryanodine receptor 1 (skeletal)
NM_003304	TRPC1	205802_at	1.362901633	17.43748639	0.180457	"transient receptor potential cation channel, subfamily C, member 1"
NM_002867	RAB3B	205925_s_at	1.211057386	17.43748639	0.229497	"RAB3B, member RAS oncogene family"
AF030625	AVPR1A	206252_s_at	1.222786774	17.43748639	0.207611	arginine vasopressin receptor 1A
J03778	MAPT	206401_s_at	1.286780217	17.43748639	0.205036	microtubule-associated protein tau
NM_000479	AMH	206516_at	1.296790491	17.43748639	0.173052	anti-Mullerian hormone
NM_004227	PSCD3	206523_at	0.725527591	17.43748639	0.0702031	"pleckstrin homology, Sec7 and coiled-coil domains 3"
NM_002064	GLRX	206662_at	0.534635081	17.43748639	0.124793	glutaredoxin (thioltransferase)
NM_000806	GABRA1	206678_at	1.322824207	17.43748639	0.226227	"gamma-aminobutyric acid (GABA) A receptor, alpha 1"
NM_004163	RAB27B	207018_s_at	0.747337202	17.43748639	0.0538082	"RAB27B, member RAS oncogene family"
NM_017643	MBTD1	207115_x_at	1.236097355	17.43748639	0.161603	mbt domain containing 1
NM_001995	ACSL1	207275_s_at	1.230459987	17.43748639	0.224054	acyl-CoA synthetase long-chain family member 1
NM_018110	DOK4	207747_s_at	0.820601472	17.43748639	0.0800995	docking protein 4
NM_021983	HLA-DRB5	208306_x_at	0.822668772	17.43748639	0.0331573	"Major histocompatibility complex, class II, DR beta 3"
NM_006690	MMP24	208387_s_at	1.342919415	17.43748639	0.16065	matrix metallopeptidase 24 (membrane-inserted)
NM_030652	PPT2 /// EGFL8	208469_s_at	1.204673226	17.43748639	0.22603	"palmitoyl-protein thioesterase 2 /// EGF-like-domain, multiple 8"
NM_007153	ZNF208	208542_x_at	1.32385095	17.43748639	0.196302	zinc finger protein 208
AF087847	GABARAPL1	208869_s_at	1.257774452	17.43748639	0.168439	GABA(A) receptor-associated protein like 1
AF038391	DHX38	209178_at	1.21003742	17.43748639	0.218744	DEAH (Asp-Glu-Ala-His) box polypeptide 38
AL536517	MEF2C	209200_at	1.220024296	17.43748639	0.153946	"MADS box transcription enhancer factor 2, polypeptide C (myocyte enhancer factor 2C)"
AF201942	NXT2	209629_s_at	0.770439235	17.43748639	0.0974084	nuclear transport factor 2-like export factor 2
AF029778	JAG2	209784_s_at	1.222883588	17.43748639	0.200534	jagged 2
D28482	RBMS1	209868_s_at	1.268463316	17.43748639	0.178221	"RNA binding motif, single stranded interacting protein 1"
AF055585	SLIT2	209897_s_at	1.210083258	17.43748639	0.230047	slit homolog 2 (Drosophila)
M34986	EPOR	209962_at	1.203384417	17.43748639	0.1996	erythropoietin receptor
AF070528	MALT1	210017_at	1.204253593	17.43748639	0.1795	mucosa associated lymphoid tissue lymphoma translocation gene 1
M10036	TPI1	210050_at	0.566529802	17.43748639	0.0857157	triosephosphate isomerase 1
BC000853	C2orf3	210175_at	0.824164673	17.43748639	0.0836956	chromosome 2 open reading frame 3
BC005032	SEC23B	210293_s_at	0.786921065	17.43748639	0.0948029	Sec23 homolog B (S. cerevisiae)
BC000669	SMOX	210357_s_at	1.256369493	17.43748639	0.161003	spermine oxidase
L14611	RORA	210479_s_at	1.67392937	17.43748639	0.12883	RAR-related orphan receptor A
M57732	TCF1	210515_at	1.221841597	17.43748639	0.2051	"transcription factor 1, hepatic; LF-B1, hepatic nuclear factor (HNF1), albumin proximal factor"
BC003610	MFGE8	210605_s_at	1.379094055	17.43748639	0.18081	milk fat globule-EGF factor 8 protein
AF173154	HYAL1	210619_s_at	1.284924312	17.43748639	0.167039	hyaluronoglucosaminidase 1
AF099032	EED	210656_at	1.308919358	17.43748639	0.14055	embryonic ectoderm development
BC003103	RIMS3	210991_s_at	0.800743005	17.43748639	0.072379	regulating synaptic membrane exocytosis 3
AF230410	PML /// LOC161527	211014_s_at	0.766575541	17.43748639	0.077813	promyelocytic leukemia /// hypothetical protein LOC161527
BC006221	TITF1	211024_s_at	1.437233141	17.43748639	0.16244	thyroid transcription factor 1 /// thyroid transcription factor 1
AF122827	NF2	211092_s_at	0.644357429	17.43748639	0.0865636	neurofibromin 2 (bilateral acoustic neuroma)
AF009616	CFLAR	211316_x_at	0.79175238	17.43748639	0.0772087	CASP8 and FADD-like apoptosis regulator
AF116715	---	211374_x_at	1.647542558	17.43748639	0.161676	PRO2829
D32201	ADRA1A	211489_at	1.487468793	17.43748639	0.185178	"adrenergic, alpha-1A-, receptor"
AF312918	MONDOA	211789_s_at	1.241343627	17.43748639	0.181589	MondoA
AW277253	AK2	212172_at	1.246984509	17.43748639	0.198391	adenylate kinase 2
NM_006662	SRCAP	212275_s_at	1.203834507	17.43748639	0.211126	Snf2-related CBP activator protein
AL137636	CLASP2	212308_at	1.216980476	17.43748639	0.183114	cytoplasmic linker associated protein 2
NM_006270	RRAS	212647_at	1.235514771	17.43748639	0.167822	related RAS viral (r-ras) oncogene homolog
AB018283	RHOBTB1	212651_at	1.323944831	17.43748639	0.191688	Rho-related BTB domain containing 1
D38553	BRRN1	212949_at	0.828139792	17.43748639	0.0914975	barren homolog (Drosophila)
AV655640	CEBPD	213006_at	1.38231986	17.43748639	0.104643	"CCAAT/enhancer binding protein (C/EBP), delta"
W26593	SET	213048_s_at	0.830444881	17.43748639	0.0968648	SET translocation (myeloid leukemia-associated)
AI471375	PRKCA	213093_at	1.202239628	17.43748639	0.170093	"protein kinase C, alpha"
H51429	H2AFX	213344_s_at	0.803245853	17.43748639	0.102257	"H2A histone family, member X"
AA724134	---	213401_s_at	0.752319994	17.43748639	0.0481742	---
AB020702	KIAA0895	213424_at	1.257276797	17.43748639	0.199437	KIAA0895 protein
AW157535	RFPL1S	214120_at	1.33058632	17.43748639	0.186979	ret finger protein-like 1 antisense
AL568374	"SEP6	214298_x_at	1.390812447	17.43748639	0.158113	septin 6
AI268381	RSC1A1	214583_at	0.778473968	17.43748639	0.0634492	"regulatory solute carrier protein, family 1, member 1"
AU146983	---	214967_at	1.36568289	17.43748639	0.13074	"CDNA FLJ12055 fis, clone HEMBB1002049"
BF973387	ELOVL5	215082_at	0.782299895	17.43748639	0.031904	"ELOVL family member 5, elongation of long chain fatty acids (FEN1/Elo2, SUR4/Elo3-like, yeast)"
H84390	PI4KII	215134_at	1.219550912	17.43748639	0.127804	phosphatidylinositol 4-kinase type II
BE567032	CRSP2	215167_at	1.224880227	17.43748639	0.0986575	"cofactor required for Sp1 transcriptional activation, subunit 2, 150kDa"
AK025143	EXT1	215206_at	1.291624407	17.43748639	0.15466	Exostoses (multiple) 1
AA927671	PHTF1	215285_s_at	0.821610674	17.43748639	0.0721646	putative homeodomain transcription factor 1
AA573862	HLA-A	215313_x_at	1.212859489	17.43748639	0.214501	"major histocompatibility complex, class I, A"
AK022473	FTO	215385_at	1.287034558	17.43748639	0.209273	Fatso
AF339807	---	215469_at	1.574431797	17.43748639	0.128886	"CDNA FLJ11627 fis, clone HEMBA1004225"
BE786598	MAST2	215903_s_at	1.214755837	17.43748639	0.246689	microtubule associated serine/threonine kinase 2
AL157418	MINK1	215909_x_at	1.263203371	17.43748639	0.161583	misshapen-like kinase 1 (zebrafish)
AI143919	FLJ38374	216053_x_at	1.385314121	17.43748639	0.160083	Chromosome 20 open reading frame 91
X52332	ZNF10	216350_s_at	1.201929406	17.43748639	0.192701	zinc finger protein 10
AK024836	HLA-C	216526_x_at	1.281881853	17.43748639	0.244097	"major histocompatibility complex, class I, C"
AV719355	---	217554_at	1.416886985	17.43748639	0.192038	"Transcribed locus, weakly similar to XP_510104.1 PREDICTED: similar to hypothetical protein FLJ25224 [Pan troglodytes]"
NM_013390	TMEM2	218113_at	1.255991439	17.43748639	0.170555	transmembrane protein 2
NM_018200	HMG20A	218152_at	1.201211506	17.43748639	0.206495	high-mobility group 20A
NM_021732	AVPI1	218631_at	1.216049164	17.43748639	0.158141	arginine vasopressin-induced 1
NM_023941	MGC3032	218641_at	1.214736697	17.43748639	0.237904	hypothetical protein MGC3032
NM_018586	SLC25A37	218978_s_at	1.225912924	17.43748639	0.224703	"solute carrier family 25, member 37"
NM_014205	ZNHIT2	219050_s_at	0.747460578	17.43748639	0.0972268	"zinc finger, HIT type 2"
NM_017707	DDEFL1	219103_at	1.250589184	17.43748639	0.152921	development and differentiation enhancing factor-like 1
AI817074	PEX26	219180_s_at	0.809784324	17.43748639	0.0943646	peroxisome biogenesis factor 26
NM_017854	FLJ20512	219219_at	0.820387809	17.43748639	0.0883613	hypothetical protein FLJ20512
NM_017577	DKFZp434C0328	219313_at	1.300091704	17.43748639	0.143353	hypothetical protein DKFZp434C0328
NM_018004	TMEM45A	219410_at	0.783155501	17.43748639	0.0955575	transmembrane protein 45A
NM_016240	SCARA3	219416_at	1.215688822	17.43748639	0.185086	"scavenger receptor class A, member 3"
NM_014556	EVC	219432_at	1.227783203	17.43748639	0.186041	Ellis van Creveld syndrome
NM_024926	FLJ12571	219758_at	0.824164346	17.43748639	0.0806246	hypothetical protein FLJ12571
NM_022133	SNX16	219793_at	1.358838175	17.43748639	0.185033	sorting nexin 16
NM_014037	SLC6A16	219820_at	1.45189341	17.43748639	0.189023	"solute carrier family 6, member 16"
NM_012153	EHF	219850_s_at	0.831967316	17.43748639	0.0887817	ets homologous factor
NM_020354	ENTPD7	220153_at	0.770450083	17.43748639	0.0633632	ectonucleoside triphosphate diphosphohydrolase 7
NM_018272	CASC1	220168_at	0.560248824	17.43748639	0.0395663	cancer susceptibility candidate 1
NM_020652	ZNF286	220250_at	1.271279583	17.43748639	0.189658	zinc finger protein 286
NM_024340	ZNF434	220292_at	0.810696969	17.43748639	0.049552	zinc finger protein 434
NM_017833	C21orf55	220372_at	1.345502657	17.43748639	0.135343	chromosome 21 open reading frame 55
NM_014150	ZCCHC4	220473_s_at	0.679466772	17.43748639	0.0697385	"zinc finger, CCHC domain containing 4"
NM_024970	C15orf28	220710_at	1.41375323	17.43748639	0.161978	chromosome 15 open reading frame 28
NM_012064	MIP	220863_at	1.313958468	17.43748639	0.123396	major intrinsic protein of lens fiber
NM_024950	FLJ35725	220891_at	1.320085354	17.43748639	0.114957	hypothetical protein FLJ35725
NM_031305	ARHGAP24	221030_s_at	1.414299278	17.43748639	0.107002	Rho GTPase activating protein 24 /// Rho GTPase activating protein 24
NM_020358	TRIM49	221154_at	2.07329543	17.43748639	0.149465	tripartite motif-containing 49
NM_025111	IQCG	221185_s_at	1.402854024	17.43748639	0.184856	IQ motif containing G
NM_017509	KLK15	221462_x_at	1.201464046	17.43748639	0.179504	kallikrein 15
BE857425	BHLHB3	221530_s_at	1.421261339	17.43748639	0.198625	"basic helix-loop-helix domain containing, class B, 3"
AW970584	HRPT2	222320_at	1.371049813	17.43748639	0.0781391	"Cell division cycle 73, Paf1/RNA polymerase II complex component, homolog (S. cerevisiae)"
AW973235	FLJ12892	222341_x_at	0.633735831	17.43748639	0.0593364	Coiled-coil domain containing 14
L02547	CSTF1	32723_at	0.818494119	17.43748639	0.066548	"cleavage stimulation factor, 3' pre-RNA, subunit 1, 50kDa"
AI743090	NPAS2	39549_at	1.687610815	17.43748639	0.118182	neuronal PAS domain protein 2
AF007155	LOC254531	40472_at	1.224771165	17.43748639	0.214905	PLSC domain containing protein
R77097	SYDE1	44702_at	1.226327126	17.43748639	0.160396	"synapse defective 1, Rho GTPase, homolog 1 (C. elegans)"
BC001288	DAF	201926_s_at	1.214615485	19.84777131	0.252258	"decay accelerating factor for complement (CD55, Cromer blood group system)"
NM_014851	KLHL21	203068_at	1.208588657	19.84777131	0.239212	kelch-like 21 (Drosophila)
NM_006633	IQGAP2	203474_at	0.64214576	19.84777131	0.0795537	IQ motif containing GTPase activating protein 2
AF285167	ABCA1	203505_at	1.424927777	19.84777131	0.160676	"ATP-binding cassette, sub-family A (ABC1), member 1"
NM_001206	KLF9	203543_s_at	0.624699637	19.84777131	0.114628	Kruppel-like factor 9
[truncated: 64 more rows]
