# Supplementary material for: An Immune-Inflammation Gene Expression Signature in Prostate Tumors of Smokers
Source: Oxford University Press journal article supplement (doi:10.1158/0008-5472.can-14-3630), 2016-01-11
Supplement: 00085472can143630-sup-142283_2_supp_3175900_nvddbq.xls [file 00085472can143630-sup-142283_2_supp_3175900_nvddbq.xls]

## Sheet: Sheet1
Supplementary Table S11: Differentially expressed genes comparing prostate tumors from nicotine-treated TRAMP mice with tumors from untreated mice (reference)
Analysis type: SAM; up- and down-regulated genes at FDR (q-value) < 30%
Gene ID	Gene Name	Fold Change	q-value(%)
Snord118	Mus musculus small nucleolar RNA, C/D box 118 (Snord118), small nucleolar RNA.	2.10472	1.38424
Snord118	Mus musculus small nucleolar RNA, C/D box 118 (Snord118), small nucleolar RNA.	2.10472	1.38424
Hist1h1b	Mus musculus histone cluster 1, H1b (Hist1h1b), mRNA.	2.03615	1.38424
Hist1h2bm	Mus musculus histone cluster 1, H2bm (Hist1h2bm), mRNA.	1.95553	1.38424
Ccnb2	Mus musculus cyclin B2 (Ccnb2), mRNA.	1.91414	1.38424
Hist2h2bb	Mus musculus histone cluster 2, H2bb (Hist2h2bb), mRNA.	1.85225	1.38424
Cdkn3	Mus musculus cyclin-dependent kinase inhibitor 3 (Cdkn3), mRNA.	1.78034	1.38424
Hist1h2bn	Mus musculus histone cluster 1, H2bn (Hist1h2bn), mRNA.	1.55247	1.38424
Hist1h2bk	Mus musculus histone cluster 1, H2bk (Hist1h2bk), mRNA.	1.53764	1.38424
Gnas	Mus musculus GNAS (guanine nucleotide binding protein, alpha stimulating) complex locus (Gnas), transcript variant 1, mRNA.	1.4846	1.38424
Got2	Mus musculus glutamate oxaloacetate transaminase 2, mitochondrial (Got2), nuclear gene encoding mitochondrial protein, mRNA.	1.4014	1.38424
Ube2c	Mus musculus ubiquitin-conjugating enzyme E2C (Ube2c), mRNA.	1.84013	2.34902
---	cdna:pseudogene chromosome:NCBIM37:4:119193595:119193971:1 gene:ENSMUSG00000084379	1.75935	2.34902
Hist1h2bl	Mus musculus histone cluster 1, H2bl (Hist1h2bl), mRNA.	1.52211	2.34902
Hist1h2bj	Mus musculus histone cluster 1, H2bj (Hist1h2bj), mRNA.	1.51773	2.34902
Pmf1	Mus musculus polyamine-modulated factor 1 (Pmf1), mRNA.	1.48806	2.34902
Plk1	Mus musculus polo-like kinase 1 (Drosophila) (Plk1), mRNA.	2.42493	2.61295
Hist1h1a	Mus musculus histone cluster 1, H1a (Hist1h1a), mRNA.	2.41071	2.61295
Kif20a	Mus musculus kinesin family member 20A (Kif20a), transcript variant 1, mRNA.	2.32238	2.61295
Cdca8	Mus musculus cell division cycle associated 8 (Cdca8), mRNA.	2.30069	2.61295
E2f8	Mus musculus E2F transcription factor 8 (E2f8), mRNA.	2.2716	2.61295
Prc1	Mus musculus protein regulator of cytokinesis 1 (Prc1), mRNA.	2.12965	2.61295
Hist1h4f	Mus musculus histone cluster 1, H4f (Hist1h4f), mRNA.	2.01448	2.61295
Hist1h4c // Hist1h4c	Mus musculus histone cluster 1, H4c (Hist1h4c), mRNA.	1.97996	2.61295
Asf1b	Mus musculus ASF1 anti-silencing function 1 homolog B (S. cerevisiae) (Asf1b), mRNA.	1.86405	2.61295
Hist1h2ba	Mus musculus histone cluster 1, H2ba (Hist1h2ba), mRNA.	1.85806	2.61295
---	cdna:pseudogene chromosome:NCBIM37:11:58775275:58775733:1 gene:ENSMUSG00000080152	1.78891	2.61295
Hist1h2bh	Mus musculus histone cluster 1, H2bh (Hist1h2bh), mRNA.	1.76304	2.61295
---	cdna:Genscan chromosome:NCBIM37:6:133715512:133882427:-1	1.6894	2.61295
H2afx	Mus musculus H2A histone family, member X (H2afx), mRNA.	1.64453	2.61295
Hist1h2bf	Mus musculus histone cluster 1, H2bf (Hist1h2bf), mRNA.	1.53048	2.61295
Tk1	Mus musculus thymidine kinase 1 (Tk1), mRNA.	1.5163	2.61295
Snora41	Mus musculus small nucleolar RNA, H/ACA box 41 (Snora41), small nucleolar RNA.	1.47982	2.61295
Tyms	Mus musculus thymidylate synthase (Tyms), transcript variant 1, mRNA.	1.47386	2.61295
Gm11277	Mus musculus predicted gene 11277 (Gm11277), mRNA.	1.4301	2.61295
Gm11277	Mus musculus predicted gene 11277 (Gm11277), mRNA.	1.4301	2.61295
Cenpm	Mus musculus centromere protein M (Cenpm), transcript variant 1, mRNA.	1.42319	2.61295
Mcm5	Mus musculus minichromosome maintenance deficient 5, cell division cycle 46 (S. cerevisiae) (Mcm5), mRNA.	1.41084	2.61295
Hist2h3c1	Mus musculus histone cluster 2, H3c1 (Hist2h3c1), mRNA.	1.38051	2.61295
Tk1	Mus musculus thymidine kinase 1 (Tk1), mRNA.	1.3238	2.61295
Fdft1	Mus musculus farnesyl diphosphate farnesyl transferase 1 (Fdft1), mRNA.	1.29162	2.61295
---	ncrna:rRNA chromosome:NCBIM37:Y:328073:328191:-1 gene:ENSMUSG00000075874	1.28432	2.61295
Ccnb1	Mus musculus cyclin B1 (Ccnb1), mRNA.	2.44465	2.79703
Kif22	Mus musculus kinesin family member 22 (Kif22), mRNA.	2.26722	2.79703
Ccna2	Mus musculus cyclin A2 (Ccna2), mRNA.	2.04317	2.79703
Snord15a	Mus musculus small nucleolar RNA, C/D box 15A (Snord15a), small nucleolar RNA.	1.63533	2.79703
Hist1h2ak	Mus musculus histone cluster 1, H2ak (Hist1h2ak), mRNA.	1.55103	2.79703
Zfp367	Mus musculus zinc finger protein 367 (Zfp367), mRNA.	1.54446	2.79703
Snora74a	Mus musculus small nucleolar RNA, H/ACA box 74A (Snora74a), small nucleolar RNA.	1.50757	2.79703
Tubb2c	Mus musculus tubulin, beta 2C (Tubb2c), mRNA.	1.50029	2.79703
Timeless	Mus musculus timeless homolog (Drosophila) (Timeless), transcript variant 1, mRNA.	1.45881	2.79703
Hist2h3b	Mus musculus histone cluster 2, H3b (Hist2h3b), mRNA.	1.42225	2.79703
Hist1h2ab	Mus musculus histone cluster 1, H2ab (Hist1h2ab), mRNA.	2.8563	3.38505
Foxm1	Mus musculus forkhead box M1 (Foxm1), mRNA.	2.55486	3.38505
Kif2c	Mus musculus kinesin family member 2C (Kif2c), mRNA.	2.52192	3.38505
Melk	Mus musculus maternal embryonic leucine zipper kinase (Melk), mRNA.	2.07022	3.38505
Incenp	Mus musculus inner centromere protein (Incenp), mRNA.	1.93388	3.38505
Ccnf	Mus musculus cyclin F (Ccnf), mRNA.	1.93341	3.38505
Mki67	Mus musculus antigen identified by monoclonal antibody Ki 67 (Mki67), mRNA.	1.92759	3.38505
Mlf1ip	Mus musculus myeloid leukemia factor 1 interacting protein (Mlf1ip), mRNA.	1.8679	3.38505
Uhrf1	Mus musculus ubiquitin-like, containing PHD and RING finger domains, 1 (Uhrf1), transcript variant 1, mRNA.	1.83113	3.38505
Hist1h4h	Mus musculus histone cluster 1, H4h (Hist1h4h), mRNA.	1.69123	3.38505
Ran	Mus musculus RAN, member RAS oncogene family (Ran), mRNA.	1.55911	3.38505
Tubb2c	Mus musculus tubulin, beta 2C (Tubb2c), mRNA.	1.53962	3.38505
Pole	Mus musculus polymerase (DNA directed), epsilon (Pole), mRNA.	1.52064	3.38505
Mcm3	Mus musculus minichromosome maintenance deficient 3 (S. cerevisiae) (Mcm3), mRNA.	1.4259	3.38505
Snora23	Mus musculus small nucleolar RNA, H/ACA box 23 (Snora23), small nucleolar RNA.	1.42073	3.38505
Hist1h3e	Mus musculus histone cluster 1, H3e (Hist1h3e), mRNA.	1.40601	3.38505
Atp5l	Mus musculus ATP synthase, H+ transporting, mitochondrial F0 complex, subunit g (Atp5l), nuclear gene encoding mitochondrial protein, mRNA.	1.27257	3.38505
Ccnb1	Mus musculus cyclin B1 (Ccnb1), mRNA.	2.41826	3.39493
Ccnb1	Mus musculus cyclin B1 (Ccnb1), mRNA.	2.41792	3.39493
Ckap2	Mus musculus cytoskeleton associated protein 2 (Ckap2), mRNA.	2.1898	3.39493
Kntc1	Mus musculus kinetochore associated 1 (Kntc1), mRNA.	2.18235	3.39493
Cdca3	Mus musculus cell division cycle associated 3 (Cdca3), mRNA.	2.04851	3.39493
Fxyd6	Mus musculus FXYD domain-containing ion transport regulator 6 (Fxyd6), mRNA.	1.92872	3.39493
D2Ertd750e	Mus musculus DNA segment, Chr 2, ERATO Doi 750, expressed (D2Ertd750e), mRNA.	1.87722	3.39493
Ckap2l	Mus musculus cytoskeleton associated protein 2-like (Ckap2l), mRNA.	1.8552	3.39493
Aurkb	Mus musculus aurora kinase B (Aurkb), mRNA.	1.81372	3.39493
Ube2s	Mus musculus ubiquitin-conjugating enzyme E2S (Ube2s), mRNA.	1.62944	3.39493
Ube2s	Mus musculus ubiquitin-conjugating enzyme E2S (Ube2s), mRNA.	1.62345	3.39493
E130306D19Rik	Mus musculus RIKEN cDNA E130306D19 gene (E130306D19Rik), mRNA.	1.58975	3.39493
BC048355	Mus musculus cDNA sequence BC048355 (BC048355), mRNA.	1.52377	3.39493
Nrarp	Mus musculus Notch-regulated ankyrin repeat protein (Nrarp), mRNA.	1.47316	3.39493
Gtf2ird1	Mus musculus general transcription factor II I repeat domain-containing 1 (Gtf2ird1), transcript variant 2, mRNA.	1.44798	3.39493
Hist1h3i	Mus musculus histone cluster 1, H3i (Hist1h3i), mRNA.	1.38784	3.39493
Hist1h3d	Mus musculus histone cluster 1, H3d (Hist1h3d), mRNA.	1.34716	3.39493
Hist1h3c	Mus musculus histone cluster 1, H3c (Hist1h3c), mRNA.	1.34463	3.39493
Hist1h3g	Mus musculus histone cluster 1, H3g (Hist1h3g), mRNA.	1.34313	3.39493
Hist1h3b	Mus musculus histone cluster 1, H3b (Hist1h3b), mRNA.	1.33752	3.39493
Pold1	Mus musculus polymerase (DNA directed), delta 1, catalytic subunit (Pold1), mRNA.	1.33216	3.39493
Ccdc124	Mus musculus coiled-coil domain containing 124 (Ccdc124), mRNA.	1.32507	3.39493
Fen1	Mus musculus flap structure specific endonuclease 1 (Fen1), mRNA.	1.23464	3.39493
Cdca2	Mus musculus cell division cycle associated 2 (Cdca2), transcript variant 2, mRNA.	1.97463	3.64177
Hmgb2	Mus musculus high mobility group box 2 (Hmgb2), mRNA.	1.63702	3.64177
Chaf1b	Mus musculus chromatin assembly factor 1, subunit B (p60) (Chaf1b), mRNA.	1.40859	3.64177
Mcm7	Mus musculus minichromosome maintenance deficient 7 (S. cerevisiae) (Mcm7), mRNA.	1.37051	3.64177
Hist1h3a	Mus musculus histone cluster 1, H3a (Hist1h3a), mRNA.	1.33423	3.64177
Nek2	Mus musculus NIMA (never in mitosis gene a)-related expressed kinase 2 (Nek2), mRNA.	2.39223	4.02108
Top2a	Mus musculus topoisomerase (DNA) II alpha (Top2a), mRNA.	2.2372	4.02108
Pbk	Mus musculus PDZ binding kinase (Pbk), mRNA.	2.21214	4.02108
Dlgap5	Mus musculus discs, large (Drosophila) homolog-associated protein 5 (Dlgap5), transcript variant 1, mRNA.	2.14509	4.02108
Birc5	Mus musculus baculoviral IAP repeat-containing 5 (Birc5), transcript variant 3, mRNA.	2.02215	4.02108
Cenpa	Mus musculus centromere protein A (Cenpa), mRNA.	1.94789	4.02108
Stmn1	Mus musculus stathmin 1 (Stmn1), mRNA.	1.83967	4.02108
Cdk1	Mus musculus cyclin-dependent kinase 1 (Cdk1), mRNA.	1.81475	4.02108
Stmn1	Mus musculus stathmin 1 (Stmn1), mRNA.	1.81346	4.02108
Dusp10	Mus musculus dual specificity phosphatase 10 (Dusp10), mRNA.	1.49229	4.02108
Atp5l	Mus musculus ATP synthase, H+ transporting, mitochondrial F0 complex, subunit g (Atp5l), nuclear gene encoding mitochondrial protein, mRNA.	1.32644	4.02108
Hist1h3h	Mus musculus histone cluster 1, H3h (Hist1h3h), mRNA.	1.3247	4.02108
Atp5l	Mus musculus ATP synthase, H+ transporting, mitochondrial F0 complex, subunit g (Atp5l), nuclear gene encoding mitochondrial protein, mRNA.	1.32128	4.02108
Pola2	Mus musculus polymerase (DNA directed), alpha 2 (Pola2), transcript variant 1, mRNA.	1.30466	4.02108
Shfm1	Mus musculus split hand/foot malformation (ectrodactyly) type 1 (Shfm1), mRNA.	1.29409	4.02108
Pkmyt1	Mus musculus protein kinase, membrane associated tyrosine/threonine 1 (Pkmyt1), mRNA.	1.27827	4.02108
Aaas	Mus musculus achalasia, adrenocortical insufficiency, alacrimia (Aaas), mRNA.	1.22829	4.02108
Cdc25c	Mus musculus cell division cycle 25 homolog C (S. pombe) (Cdc25c), mRNA.	2.63612	4.23679
Racgap1	Mus musculus Rac GTPase-activating protein 1 (Racgap1), mRNA.	2.43667	4.23679
Cenpf	Mus musculus centromere protein F (Cenpf), mRNA.	2.19547	4.23679
Ect2	Mus musculus ect2 oncogene (Ect2), transcript variant 1, mRNA.	2.18794	4.23679
Spag5	Mus musculus sperm associated antigen 5 (Spag5), mRNA.	2.13551	4.23679
Neurl1B	Mus musculus neuralized homolog 1B (Drosophila) (Neurl1B), mRNA.	1.94535	4.23679
Iqgap3	Mus musculus IQ motif containing GTPase activating protein 3 (Iqgap3), mRNA.	1.94325	4.23679
Cdc20	Mus musculus cell division cycle 20 homolog (S. cerevisiae) (Cdc20), mRNA.	1.79006	4.23679
Ncapd2	Mus musculus non-SMC condensin I complex, subunit D2 (Ncapd2), mRNA.	1.78392	4.23679
Spc24	Mus musculus SPC24, NDC80 kinetochore complex component, homolog (S. cerevisiae) (Spc24), mRNA.	1.71783	4.23679
Hist3h2ba	Mus musculus histone cluster 3, H2ba (Hist3h2ba), mRNA.	1.63279	4.23679
Hmgb2	Mus musculus high mobility group box 2 (Hmgb2), mRNA.	1.61907	4.23679
Hist4h4	Mus musculus histone cluster 4, H4 (Hist4h4), mRNA.	1.61846	4.23679
Kif24	Mus musculus kinesin family member 24 (Kif24), mRNA.	1.6017	4.23679
Hmgb2	Mus musculus high mobility group box 2 (Hmgb2), mRNA.	1.59287	4.23679
4930427A07Rik	Mus musculus RIKEN cDNA 4930427A07 gene (4930427A07Rik), mRNA.	1.58999	4.23679
Hist2h4	Mus musculus histone cluster 2, H4 (Hist2h4), mRNA.	1.52328	4.23679
Hist2h2ab	Mus musculus histone cluster 2, H2ab (Hist2h2ab), mRNA.	1.49338	4.23679
Cks2	Mus musculus CDC28 protein kinase regulatory subunit 2 (Cks2), mRNA.	1.47448	4.23679
Rpp25	Mus musculus ribonuclease P 25 subunit (human) (Rpp25), mRNA.	1.43713	4.23679
Poc1a	Mus musculus POC1 centriolar protein homolog A (Chlamydomonas) (Poc1a), mRNA.	1.43498	4.23679
Hist1h2an	Mus musculus histone cluster 1, H2an (Hist1h2an), mRNA.	1.42098	4.23679
Hist1h2ao	Mus musculus histone cluster 1, H2ao (Hist1h2ao), mRNA.	1.41114	4.23679
Hist1h2ai	Mus musculus histone cluster 1, H2ai (Hist1h2ai), mRNA.	1.40364	4.23679
Hist1h2ag	Mus musculus histone cluster 1, H2ag (Hist1h2ag), mRNA.	1.39957	4.23679
Hist1h2ah	Mus musculus histone cluster 1, H2ah (Hist1h2ah), mRNA.	1.3938	4.23679
Hist1h2ad	Mus musculus histone cluster 1, H2ad (Hist1h2ad), mRNA.	1.38826	4.23679
Hist1h2ao	Mus musculus histone cluster 1, H2ao (Hist1h2ao), mRNA.	1.38826	4.23679
Hist1h2af	Mus musculus histone cluster 1, H2af (Hist1h2af), mRNA.	1.38822	4.23679
Hist1h2ai	Mus musculus histone cluster 1, H2ai (Hist1h2ai), mRNA.	1.38686	4.23679
---	ncrna:snoRNA chromosome:NCBIM37:19:4078299:4078512:-1 gene:ENSMUSG00000064400	1.37727	4.23679
Hist2h2aa1	Mus musculus histone cluster 2, H2aa1 (Hist2h2aa1), mRNA.	1.3727	4.23679
Fignl1	Mus musculus fidgetin-like 1 (Fignl1), transcript variant 1, mRNA.	1.36568	4.23679
Cic	Mus musculus capicua homolog (Drosophila) (Cic), transcript variant 1, mRNA.	1.3632	4.23679
2900010M23Rik	Mus musculus RIKEN cDNA 2900010M23 gene, mRNA (cDNA clone MGC:41028 IMAGE:1054665), complete cds.	1.36237	4.23679
---	ncrna:rRNA chromosome:NCBIM37:6:140268151:140268254:1 gene:ENSMUSG00000065882	1.35147	4.23679
Hist1h4m	Mus musculus histone cluster 1, H4m (Hist1h4m), mRNA.	1.34237	4.23679
Hist1h4m	Mus musculus histone cluster 1, H4m (Hist1h4m), mRNA.	1.34237	4.23679
Atp5l	Mus musculus ATP synthase, H+ transporting, mitochondrial F0 complex, subunit g (Atp5l), nuclear gene encoding mitochondrial protein, mRNA.	1.33161	4.23679
Hist1h4a	Mus musculus histone cluster 1, H4a (Hist1h4a), mRNA.	1.32138	4.23679
Fam100b	Mus musculus family with sequence similarity 100, member B (Fam100b), mRNA.	1.32081	4.23679
Hist1h4d	Mus musculus histone cluster 1, H4d (Hist1h4d), mRNA.	1.28737	4.23679
---	cdna:known chromosome:NCBIM37:17:27259613:27270568:-1 gene:ENSMUSG00000024208	1.28235	4.23679
Ranbp1	Mus musculus RAN binding protein 1 (Ranbp1), mRNA.	1.27554	4.23679
Wdr31	Mus musculus WD repeat domain 31 (Wdr31), mRNA.	1.27096	4.23679
Rfc2	Mus musculus replication factor C (activator 1) 2 (Rfc2), mRNA.	1.26345	4.23679
Mcrs1	Mus musculus microspherule protein 1 (Mcrs1), transcript variant 1, mRNA.	1.25112	4.23679
Fam134a	Mus musculus family with sequence similarity 134, member A (Fam134a), mRNA.	1.231	4.23679
---	cdna:known chromosome:NCBIM37:11:99793522:99794418:1 gene:ENSMUSG00000086688	1.22329	4.23679
Dpy30	Mus musculus dpy-30 homolog (C. elegans) (Dpy30), transcript variant 2, mRNA.	1.21833	4.23679
Aspm	Mus musculus asp (abnormal spindle)-like, microcephaly associated (Drosophila) (Aspm), mRNA.	2.40156	4.35492
Prr11	Mus musculus proline rich 11 (Prr11), mRNA.	2.03192	4.35492
Cdca5	Mus musculus cell division cycle associated 5 (Cdca5), mRNA.	2.02723	4.35492
Kif23	Mus musculus kinesin family member 23 (Kif23), mRNA.	2.00395	4.35492
Cit	Mus musculus citron (Cit), mRNA.	1.99801	4.35492
Nusap1	Mus musculus nucleolar and spindle associated protein 1 (Nusap1), transcript variant 1, mRNA.	1.99651	4.35492
Rrm1	Mus musculus ribonucleotide reductase M1 (Rrm1), mRNA.	1.52997	4.35492
Panx1	Mus musculus pannexin 1 (Panx1), mRNA.	1.52972	4.35492
Cks2	Mus musculus CDC28 protein kinase regulatory subunit 2 (Cks2), mRNA.	1.52268	4.35492
Cks2	Mus musculus CDC28 protein kinase regulatory subunit 2 (Cks2), mRNA.	1.52035	4.35492
Fabp3	Mus musculus fatty acid binding protein 3, muscle and heart (Fabp3), mRNA.	1.40665	4.35492
Ulk4	Mus musculus unc-51-like kinase 4 (C. elegans) (Ulk4), mRNA.	1.37336	4.35492
Rfc5	Mus musculus replication factor C (activator 1) 5 (Rfc5), mRNA.	1.36968	4.35492
Hist1h4k	Mus musculus histone cluster 1, H4k (Hist1h4k), mRNA.	1.30328	4.35492
Hist1h4b	Mus musculus histone cluster 1, H4b (Hist1h4b), mRNA.	1.30113	4.35492
Fam100b	Mus musculus family with sequence similarity 100, member B (Fam100b), mRNA.	1.29838	4.35492
Fam100b	Mus musculus family with sequence similarity 100, member B (Fam100b), mRNA.	1.29838	4.35492
---	ncrna:rRNA chromosome:NCBIM37:9:102030218:102030335:1 gene:ENSMUSG00000065107	1.29698	4.35492
Ndufa11	Mus musculus NADH dehydrogenase (ubiquinone) 1 alpha subcomplex 11 (Ndufa11), nuclear gene encoding mitochondrial protein, mRNA.	1.29055	4.35492
---	ncrna:rRNA chromosome:NCBIM37:X:5684009:5684127:1 gene:ENSMUSG00000075918	1.26077	4.35492
Thop1	Mus musculus thimet oligopeptidase 1 (Thop1), mRNA.	1.23662	4.35492
Fam64a	Mus musculus family with sequence similarity 64, member A (Fam64a), mRNA.	2.30263	4.9428
Kif18b	Mus musculus kinesin family member 18B (Kif18b), mRNA.	2.10594	4.9428
Kif4	Mus musculus kinesin family member 4 (Kif4), mRNA.	2.07638	4.9428
Ndc80	Mus musculus NDC80 homolog, kinetochore complex component (S. cerevisiae) (Ndc80), mRNA.	1.9337	4.9428
Cep55	Mus musculus centrosomal protein 55 (Cep55), transcript variant 1, mRNA.	1.85887	4.9428
Fanci	Mus musculus Fanconi anemia, complementation group I (Fanci), mRNA.	1.84355	4.9428
Camk2n2	Mus musculus calcium/calmodulin-dependent protein kinase II inhibitor 2 (Camk2n2), mRNA.	1.74059	4.9428
Rad54l	Mus musculus RAD54 like (S. cerevisiae) (Rad54l), transcript variant 1, mRNA.	1.7032	4.9428
Mcm10	Mus musculus minichromosome maintenance deficient 10 (S. cerevisiae) (Mcm10), mRNA.	1.70026	4.9428
Tceal3	Mus musculus transcription elongation factor A (SII)-like 3 (Tceal3), mRNA.	1.6791	4.9428
Gtse1	Mus musculus G two S phase expressed protein 1 (Gtse1), transcript variant 2, mRNA.	1.60057	4.9428
Hmgb2	Mus musculus high mobility group box 2 (Hmgb2), mRNA.	1.59408	4.9428
---	cdna:known chromosome:NCBIM37:13:8289092:8289361:-1 gene:ENSMUSG00000072421	1.42385	4.9428
Hist2h2ac	Mus musculus histone cluster 2, H2ac (Hist2h2ac), mRNA.	1.38924	4.9428
Eno1	Mus musculus enolase 1, alpha non-neuron (Eno1), mRNA.	1.34128	4.9428
Fen1	Mus musculus flap structure specific endonuclease 1 (Fen1), mRNA.	1.33382	4.9428
H2afz	Mus musculus H2A histone family, member Z (H2afz), mRNA.	1.32977	4.9428
Atp5l	Mus musculus ATP synthase, H+ transporting, mitochondrial F0 complex, subunit g (Atp5l), nuclear gene encoding mitochondrial protein, mRNA.	1.31235	4.9428
Trio	Mus musculus triple functional domain (PTPRF interacting) (Trio), mRNA.	1.30756	4.9428
H2afz	Mus musculus H2A histone family, member Z (H2afz), mRNA.	1.30476	4.9428
Chchd1	Mus musculus coiled-coil-helix-coiled-coil-helix domain containing 1 (Chchd1), mRNA.	1.27439	4.9428
N4bp3	Mus musculus NEDD4 binding protein 3 (N4bp3), mRNA.	1.25027	4.9428
Fdps	Mus musculus farnesyl diphosphate synthetase (Fdps), mRNA.	1.24653	4.9428
Bcl7c	Mus musculus B-cell CLL/lymphoma 7C (Bcl7c), mRNA.	1.21766	4.9428
Szt2	Mus musculus seizure threshold 2 (Szt2), mRNA.	1.20123	4.9428
Rnaseh2c	Mus musculus ribonuclease H2, subunit C (Rnaseh2c), mRNA.	1.19317	4.9428
Troap	Mus musculus trophinin associated protein (Troap), transcript variant 1, mRNA.	1.94896	5.66518
Cdc25b	Mus musculus cell division cycle 25 homolog B (S. pombe) (Cdc25b), transcript variant 1, mRNA.	1.83663	5.66518
Kif14	Mus musculus kinesin family member 14 (Kif14), mRNA.	1.81873	5.66518
Hap1	Mus musculus huntingtin-associated protein 1 (Hap1), transcript variant 1, mRNA.	1.75319	5.66518
Dot1l	Mus musculus DOT1-like, histone H3 methyltransferase (S. cerevisiae) (Dot1l), mRNA.	1.53596	5.66518
4930579G24Rik	Mus musculus RIKEN cDNA 4930579G24 gene (4930579G24Rik), mRNA.	1.48128	5.66518
Cdkn1a	Mus musculus cyclin-dependent kinase inhibitor 1A (P21) (Cdkn1a), transcript variant 1, mRNA.	1.47434	5.66518
Chtf18	Mus musculus CTF18, chromosome transmission fidelity factor 18 homolog (S. cerevisiae) (Chtf18), mRNA.	1.39992	5.66518
Hist2h2aa1	Mus musculus histone cluster 2, H2aa1 (Hist2h2aa1), mRNA.	1.39839	5.66518
Hist2h2aa1	Mus musculus histone cluster 2, H2aa1 (Hist2h2aa1), mRNA.	1.37441	5.66518
---	ncrna:rRNA chromosome:NCBIM37:8:126123761:126123879:-1 gene:ENSMUSG00000075942	1.26206	5.66518
Sgol2	Mus musculus shugoshin-like 2 (S. pombe) (Sgol2), transcript variant 1, mRNA.	2.11344	6.26827
Fancd2	Mus musculus Fanconi anemia, complementation group D2 (Fancd2), mRNA.	2.09004	6.26827
Kif11	Mus musculus kinesin family member 11 (Kif11), mRNA.	2.02135	6.26827
Spc25	Mus musculus SPC25, NDC80 kinetochore complex component, homolog (S. cerevisiae) (Spc25), mRNA.	1.92682	6.26827
Pim1	Mus musculus proviral integration site 1 (Pim1), mRNA.	1.61794	6.26827
H1f0	Mus musculus H1 histone family, member 0 (H1f0), mRNA.	1.49568	6.26827
Dnmt1	Mus musculus DNA methyltransferase (cytosine-5) 1 (Dnmt1), mRNA.	1.48562	6.26827
Serpine1	Mus musculus serine (or cysteine) peptidase inhibitor, clade E, member 1 (Serpine1), mRNA.	1.4681	6.26827
Cpt1b	Mus musculus carnitine palmitoyltransferase 1b, muscle (Cpt1b), nuclear gene encoding mitochondrial protein, mRNA.	1.45529	6.26827
Wdr90	Mus musculus WD repeat domain 90 (Wdr90), mRNA.	1.42927	6.26827
Dctpp1	Mus musculus dCTP pyrophosphatase 1 (Dctpp1), mRNA.	1.42807	6.26827
Hist2h2aa1	Mus musculus histone cluster 2, H2aa1 (Hist2h2aa1), mRNA.	1.38059	6.26827
---	Mus musculus 5.8S ribosomal RNA (LOC790956).	1.37526	6.26827
---	cdna:novel chromosome:NCBIM37:8:43332189:43332805:1 gene:ENSMUSG00000053038	1.28757	6.26827
Timm50	Mus musculus translocase of inner mitochondrial membrane 50 homolog (yeast) (Timm50), nuclear gene encoding mitochondrial protein, mRNA.	1.26522	6.26827
Yjefn3	Mus musculus YjeF N-terminal domain containing 3, mRNA (cDNA clone IMAGE:1332678), partial cds.	1.23518	6.26827
Tpm4	Mus musculus tropomyosin 4 (Tpm4), mRNA.	1.22997	6.26827
Myg1	Mus musculus melanocyte proliferating gene 1 (Myg1), mRNA.	1.21961	6.26827
Paqr4	Mus musculus progestin and adipoQ receptor family member IV (Paqr4), mRNA.	1.21374	6.26827
Atp5o	Mus musculus ATP synthase, H+ transporting, mitochondrial F1 complex, O subunit (Atp5o), nuclear gene encoding mitochondrial protein, mRNA.	1.18838	6.26827
Hmmr	Mus musculus hyaluronan mediated motility receptor (RHAMM) (Hmmr), mRNA.	2.17604	6.93284
Tpx2	Mus musculus TPX2, microtubule-associated protein homolog (Xenopus laevis) (Tpx2), transcript variant 1, mRNA.	2.10488	6.93284
Gas2l3	Mus musculus growth arrest-specific 2 like 3 (Gas2l3), transcript variant 1, mRNA.	2.06821	6.93284
Depdc1a	Mus musculus DEP domain containing 1a (Depdc1a), transcript variant 1, mRNA.	1.94923	6.93284
Cenpn	Mus musculus centromere protein N (Cenpn), mRNA.	1.913	6.93284
H1fx	Mus musculus H1 histone family, member X (H1fx), mRNA.	1.90522	6.93284
Tacc3	Mus musculus transforming, acidic coiled-coil containing protein 3 (Tacc3), mRNA.	1.90197	6.93284
Depdc1a	Mus musculus DEP domain containing 1a (Depdc1a), transcript variant 1, mRNA.	1.84805	6.93284
Morn4	Mus musculus MORN repeat containing 4 (Morn4), mRNA.	1.82419	6.93284
5730590G19Rik	Mus musculus RIKEN cDNA 5730590G19 gene (5730590G19Rik), mRNA.	1.81795	6.93284
Esco2	Mus musculus establishment of cohesion 1 homolog 2 (S. cerevisiae) (Esco2), mRNA.	1.76496	6.93284
Aurka	Mus musculus aurora kinase A (Aurka), mRNA.	1.59454	6.93284
Sqle	Mus musculus squalene epoxidase (Sqle), mRNA.	1.58352	6.93284
Gpsm2	Mus musculus G-protein signalling modulator 2 (AGS3-like, C. elegans) (Gpsm2), mRNA.	1.53278	6.93284
Rcc2	Mus musculus regulator of chromosome condensation 2 (Rcc2), mRNA.	1.49288	6.93284
Nmral1	Mus musculus NmrA-like family domain containing 1 (Nmral1), mRNA.	1.48451	6.93284
Ube2t	Mus musculus ubiquitin-conjugating enzyme E2T (putative) (Ube2t), mRNA.	1.45711	6.93284
Ctps	Mus musculus cytidine 5'-triphosphate synthase (Ctps), mRNA.	1.45402	6.93284
H2afv	Mus musculus H2A histone family, member V (H2afv), mRNA.	1.42164	6.93284
Tubb5	Mus musculus tubulin, beta 5 (Tubb5), mRNA.	1.40817	6.93284
Myl6b	Mus musculus myosin, light polypeptide 6B (Myl6b), mRNA.	1.39353	6.93284
Prmt1	Mus musculus protein arginine N-methyltransferase 1 (Prmt1), mRNA.	1.38951	6.93284
---	gi|34538597|ref|NC_005089.1|:9391-9458, tRNA-Gly	1.37973	6.93284
---	cdna:Genscan chromosome:NCBIM37:12:52234535:52378754:-1	1.35755	6.93284
Anapc5	Mus musculus anaphase-promoting complex subunit 5 (Anapc5), transcript variant 1, mRNA.	1.35601	6.93284
Nup85	Mus musculus nucleoporin 85 (Nup85), mRNA.	1.34664	6.93284
Rmrp	Mus musculus RNA component of mitochondrial RNAase P (Rmrp), RNase MRP RNA.	1.31828	6.93284
Cdt1	Mus musculus chromatin licensing and DNA replication factor 1 (Cdt1), mRNA.	1.3001	6.93284
Tfdp1	Mus musculus transcription factor Dp 1 (Tfdp1), mRNA.	1.29539	6.93284
Lsm4	Mus musculus LSM4 homolog, U6 small nuclear RNA associated (S. cerevisiae) (Lsm4), mRNA.	1.27655	6.93284
Pold3	Mus musculus polymerase (DNA-directed), delta 3, accessory subunit (Pold3), mRNA.	1.27597	6.93284
Paxip1	Mus musculus PAX interacting (with transcription-activation domain) protein 1 (Paxip1), mRNA.	1.22855	6.93284
Tuba1a	Mus musculus tubulin, alpha 1A (Tuba1a), mRNA.	2.44586	7.62968
Lrp11	Mus musculus low density lipoprotein receptor-related protein 11 (Lrp11), mRNA.	2.30228	7.62968
Neil3	Mus musculus nei like 3 (E. coli) (Neil3), mRNA.	2.08568	7.62968
Neurl1B	Mus musculus neuralized homolog 1B (Drosophila) (Neurl1B), mRNA.	1.94707	7.62968
Pgbd5	Mus musculus piggyBac transposable element derived 5 (Pgbd5), mRNA.	1.87253	7.62968
Dna2	Mus musculus DNA replication helicase 2 homolog (yeast) (Dna2), mRNA.	1.84306	7.62968
L1cam	Mus musculus L1 cell adhesion molecule (L1cam), mRNA.	1.83023	7.62968
Bub1b	Mus musculus budding uninhibited by benzimidazoles 1 homolog, beta (S. cerevisiae) (Bub1b), mRNA.	1.76055	7.62968
Hist1h2bb	Mus musculus histone cluster 1, H2bb (Hist1h2bb), mRNA.	1.75635	7.62968
Eme1	Mus musculus essential meiotic endonuclease 1 homolog 1 (S. pombe) (Eme1), mRNA.	1.74894	7.62968
Hn1	Mus musculus hematological and neurological expressed sequence 1 (Hn1), mRNA.	1.72239	7.62968
Clspn	Mus musculus claspin homolog (Xenopus laevis) (Clspn), mRNA.	1.68269	7.62968
Cenph	Mus musculus centromere protein H (Cenph), mRNA.	1.65841	7.62968
Rad51	Mus musculus RAD51 homolog (S. cerevisiae) (Rad51), mRNA.	1.59936	7.62968
Srd5a1	Mus musculus steroid 5 alpha-reductase 1 (Srd5a1), mRNA.	1.58606	7.62968
Hirip3	Mus musculus HIRA interacting protein 3 (Hirip3), mRNA.	1.57676	7.62968
E2f7	Mus musculus E2F transcription factor 7 (E2f7), mRNA.	1.57321	7.62968
---	ncrna:rRNA chromosome:NCBIM37:1:37062284:37062402:1 gene:ENSMUSG00000070201	1.51785	7.62968
Kpna2	Mus musculus karyopherin (importin) alpha 2 (Kpna2), mRNA.	1.51172	7.62968
Exo1	Mus musculus exonuclease 1 (Exo1), mRNA.	1.49956	7.62968
Kpna2	Mus musculus karyopherin (importin) alpha 2 (Kpna2), mRNA.	1.48801	7.62968
Rnu3b1	Mus musculus U3B small nuclear RNA 1 (Rnu3b1), small nuclear RNA.	1.47951	7.62968
Rnu3b1	Mus musculus U3B small nuclear RNA 1 (Rnu3b1), small nuclear RNA.	1.47951	7.62968
Rnu3b1	Mus musculus U3B small nuclear RNA 1 (Rnu3b1), small nuclear RNA.	1.47951	7.62968
Rnu3b1	Mus musculus U3B small nuclear RNA 1 (Rnu3b1), small nuclear RNA.	1.47951	7.62968
Igsf9	Mus musculus immunoglobulin superfamily, member 9 (Igsf9), transcript variant 1, mRNA.	1.4428	7.62968
---	ncrna:snoRNA chromosome:NCBIM37:19:8798741:8798815:1 gene:ENSMUSG00000065392	1.44081	7.62968
Calm2	Mus musculus calmodulin 2 (Calm2), mRNA.	1.41968	7.62968
Rgs3	Mus musculus regulator of G-protein signaling 3 (Rgs3), transcript variant 2, mRNA.	1.41353	7.62968
Snora61	Mus musculus small nucleolar RNA, H/ACA box 61 (Snora61), small nucleolar RNA.	1.40872	7.62968
Calm3	Mus musculus calmodulin 3 (Calm3), mRNA.	1.39337	7.62968
Rnu1b1	Mus musculus U1b1 small nuclear RNA (Rnu1b1), small nuclear RNA.	1.39006	7.62968
Rnu1b1	Mus musculus U1b1 small nuclear RNA (Rnu1b1), small nuclear RNA.	1.39006	7.62968
Rnu1b1	Mus musculus U1b1 small nuclear RNA (Rnu1b1), small nuclear RNA.	1.39006	7.62968
Rnu1b1	Mus musculus U1b1 small nuclear RNA (Rnu1b1), small nuclear RNA.	1.39006	7.62968
Rnu1b1	Mus musculus U1b1 small nuclear RNA (Rnu1b1), small nuclear RNA.	1.39006	7.62968
Lig1	Mus musculus ligase I, DNA, ATP-dependent (Lig1), transcript variant 1, mRNA.	1.38931	7.62968
---	Mouse 5S ribosomal RNA.	1.36782	7.62968
Cand2	Mus musculus cullin-associated and neddylation-dissociated 2 (putative) (Cand2), mRNA.	1.35784	7.62968
Lrdd	Mus musculus leucine-rich and death domain containing (Lrdd), mRNA.	1.35375	7.62968
---	ncrna:rRNA chromosome:NCBIM37:1:46431042:46431160:1 gene:ENSMUSG00000070199	1.34872	7.62968
Rpa2	Mus musculus replication protein A2 (Rpa2), mRNA.	1.34426	7.62968
Hnrnpa0	Mus musculus heterogeneous nuclear ribonucleoprotein A0 (Hnrnpa0), mRNA.	1.33003	7.62968
Katnb1	Mus musculus katanin p80 (WD40-containing) subunit B 1 (Katnb1), mRNA.	1.32817	7.62968
---	ncrna:snoRNA chromosome:NCBIM37:9:120037898:120038053:1 gene:ENSMUSG00000065041	1.3268	7.62968
Ptpla	Mus musculus protein tyrosine phosphatase-like (proline instead of catalytic arginine), member a (Ptpla), transcript variant 1, mRNA.	1.32154	7.62968
Tuba1b	Mus musculus tubulin, alpha 1B (Tuba1b), mRNA.	1.30969	7.62968
---	cdna:Genscan chromosome:NCBIM37:16:50106207:50112166:1	1.30554	7.62968
Ppil1	Mus musculus peptidylprolyl isomerase (cyclophilin)-like 1 (Ppil1), mRNA.	1.29927	7.62968
---	cdna:pseudogene chromosome:NCBIM37:X:61300729:61301081:-1 gene:ENSMUSG00000083346	1.29876	7.62968
Lrfn3	Mus musculus leucine rich repeat and fibronectin type III domain containing 3 (Lrfn3), mRNA.	1.29127	7.62968
2410022L05Rik	Mus musculus RIKEN cDNA 2410022L05 gene (2410022L05Rik), mRNA.	1.28867	7.62968
Cdh24	Mus musculus cadherin-like 24 (Cdh24), mRNA.	1.28264	7.62968
Ankrd13b	Mus musculus ankyrin repeat domain 13b (Ankrd13b), mRNA.	1.28017	7.62968
Syngr4	Mus musculus synaptogyrin 4 (Syngr4), mRNA.	1.25299	7.62968
Gmnn	Mus musculus geminin (Gmnn), mRNA.	1.24483	7.62968
---	ncrna:rRNA chromosome:NCBIM37:7:17057162:17057280:1 gene:ENSMUSG00000065893	1.22865	7.62968
0610009O20Rik	Mus musculus RIKEN cDNA 0610009O20 gene (0610009O20Rik), mRNA.	1.21403	7.62968
Ppm1d	Mus musculus protein phosphatase 1D magnesium-dependent, delta isoform (Ppm1d), mRNA.	1.21356	7.62968
Hdgfrp2	Mus musculus hepatoma-derived growth factor, related protein 2 (Hdgfrp2), mRNA.	1.20644	7.62968
Tceb2	Mus musculus transcription elongation factor B (SIII), polypeptide 2 (Tceb2), mRNA.	1.1784	7.62968
---	ncrna:rRNA chromosome:NCBIM37:14:110561057:110561167:1 gene:ENSMUSG00000065102	1.17719	7.62968
Adcy1	Mus musculus adenylate cyclase 1 (Adcy1), mRNA.	3.16634	8.40799
Odz4	Mus musculus odd Oz/ten-m homolog 4 (Drosophila) (Odz4), mRNA.	2.14657	8.40799
Sox1	Mus musculus SRY-box containing gene 1 (Sox1), mRNA.	2.06916	8.40799
Basp1	Mus musculus brain abundant, membrane attached signal protein 1 (Basp1), mRNA.	2.00045	8.40799
Cenpi	Mus musculus centromere protein I (Cenpi), mRNA.	1.88834	8.40799
Cdkn2d	Mus musculus cyclin-dependent kinase inhibitor 2D (p19, inhibits CDK4) (Cdkn2d), mRNA.	1.80989	8.40799
Espl1	Mus musculus extra spindle poles-like 1 (S. cerevisiae) (Espl1), mRNA.	1.78161	8.40799
Syt2	Mus musculus synaptotagmin II (Syt2), mRNA.	1.76862	8.40799
F630043A04Rik	Mus musculus RIKEN cDNA F630043A04 gene (F630043A04Rik), mRNA.	1.76349	8.40799
Sgol1	Mus musculus shugoshin-like 1 (S. pombe) (Sgol1), mRNA.	1.71335	8.40799
Kcnb1	Mus musculus potassium voltage gated channel, Shab-related subfamily, member 1 (Kcnb1), mRNA.	1.70564	8.40799
---	cdna:known chromosome:NCBIM37:12:20881501:20927123:-1 gene:ENSMUSG00000085642	1.6923	8.40799
---	cdna:known chromosome:NCBIM37:12:20881501:20927123:-1 gene:ENSMUSG00000085642	1.6923	8.40799
Dck	Mus musculus deoxycytidine kinase (Dck), mRNA.	1.65868	8.40799
Tmem48	Mus musculus transmembrane protein 48 (Tmem48), mRNA.	1.61504	8.40799
Gsg2	Mus musculus germ cell-specific gene 2 (Gsg2), mRNA.	1.57459	8.40799
Slc16a1	Mus musculus solute carrier family 16 (monocarboxylic acid transporters), member 1 (Slc16a1), mRNA.	1.53716	8.40799
Kpna2	Mus musculus karyopherin (importin) alpha 2 (Kpna2), mRNA.	1.48767	8.40799
Hmgn2	Mus musculus high mobility group nucleosomal binding domain 2 (Hmgn2), mRNA.	1.39454	8.40799
Cntrob	Mus musculus centrobin, centrosomal BRCA2 interacting protein (Cntrob), mRNA.	1.38597	8.40799
Rem2	Mus musculus rad and gem related GTP binding protein 2 (Rem2), mRNA.	1.38302	8.40799
Pir	Mus musculus pirin (Pir), mRNA.	1.37147	8.40799
Snrpd1	Mus musculus small nuclear ribonucleoprotein D1 (Snrpd1), mRNA.	1.36158	8.40799
Hsd17b7	Mus musculus hydroxysteroid (17-beta) dehydrogenase 7 (Hsd17b7), mRNA.	1.34966	8.40799
Dyrk3	Mus musculus dual-specificity tyrosine-(Y)-phosphorylation regulated kinase 3 (Dyrk3), mRNA.	1.33855	8.40799
---	cdna:Genscan chromosome:NCBIM37:10:25553017:25553502:-1	1.33292	8.40799
Tuba1b	Mus musculus tubulin, alpha 1B (Tuba1b), mRNA.	1.32551	8.40799
Fabp3	Mus musculus fatty acid binding protein 3, muscle and heart (Fabp3), mRNA.	1.32435	8.40799
Tuba1b // Tuba1b	Mus musculus tubulin, alpha 1B (Tuba1b), mRNA.	1.31061	8.40799
Pold2	Mus musculus polymerase (DNA directed), delta 2, regulatory subunit (Pold2), mRNA.	1.30958	8.40799
Tuba1c	Mus musculus tubulin, alpha 1C (Tuba1c), mRNA.	1.29489	8.40799
---	ncrna:rRNA chromosome:NCBIM37:8:126108435:126108553:-1 gene:ENSMUSG00000075856	1.28529	8.40799
Tubgcp2	Mus musculus tubulin, gamma complex associated protein 2 (Tubgcp2), mRNA.	1.2827	8.40799
Fasn	Mus musculus fatty acid synthase (Fasn), mRNA.	1.26322	8.40799
Haus5	Mus musculus HAUS augmin-like complex, subunit 5 (Haus5), mRNA.	1.23438	8.40799
Nrm	Mus musculus nurim (nuclear envelope membrane protein) (Nrm), mRNA.	1.23033	8.40799
Gm6682	Mus musculus predicted gene 6682 (Gm6682), non-coding RNA.	1.22726	8.40799
Dcps	Mus musculus decapping enzyme, scavenger (Dcps), mRNA.	1.21664	8.40799
Necab1	Mus musculus N-terminal EF-hand calcium binding protein 1 (Necab1), mRNA.	3.93158	8.86152
Bhlhe22	Mus musculus basic helix-loop-helix family, member e22 (Bhlhe22), mRNA.	2.19543	8.86152
Chrnb2	Mus musculus cholinergic receptor, nicotinic, beta polypeptide 2 (neuronal) (Chrnb2), mRNA.	2.15189	8.86152
Rnf157	Mus musculus ring finger protein 157 (Rnf157), mRNA.	2.0707	8.86152
Tubb3	Mus musculus tubulin, beta 3 (Tubb3), mRNA.	1.8927	8.86152
Aif1l	Mus musculus allograft inflammatory factor 1-like (Aif1l), mRNA.	1.89098	8.86152
Fabp5	Mus musculus fatty acid binding protein 5, epidermal (Fabp5), mRNA.	1.83551	8.86152
4930547N16Rik	Mus musculus RIKEN cDNA 4930547N16 gene (4930547N16Rik), mRNA.	1.83267	8.86152
Fabp5	Mus musculus fatty acid binding protein 5, epidermal (Fabp5), mRNA.	1.83163	8.86152
Lmnb1	Mus musculus lamin B1 (Lmnb1), mRNA.	1.76295	8.86152
---	cdna:Genscan chromosome:NCBIM37:15:103276555:103278901:-1	1.71391	8.86152
Depdc1b	Mus musculus DEP domain containing 1B (Depdc1b), mRNA.	1.67554	8.86152
Kcnh1	Mus musculus potassium voltage-gated channel, subfamily H (eag-related), member 1 (Kcnh1), transcript variant 1, mRNA.	1.67442	8.86152
Ncapg2	Mus musculus non-SMC condensin II complex, subunit G2 (Ncapg2), mRNA.	1.54981	8.86152
2610039C10Rik	Mus musculus RIKEN cDNA 2610039C10 gene (2610039C10Rik), mRNA.	1.54331	8.86152
Hmgcr	Mus musculus 3-hydroxy-3-methylglutaryl-Coenzyme A reductase (Hmgcr), mRNA.	1.54225	8.86152
Mxd3	Mus musculus Max dimerization protein 3 (Mxd3), mRNA.	1.52901	8.86152
Brip1	Mus musculus BRCA1 interacting protein C-terminal helicase 1 (Brip1), mRNA.	1.52803	8.86152
Wdr62	Mus musculus WD repeat domain 62 (Wdr62), mRNA.	1.49988	8.86152
Tubg2	Mus musculus tubulin, gamma 2 (Tubg2), mRNA.	1.48773	8.86152
Zcwpw1	Mus musculus zinc finger, CW type with PWWP domain 1 (Zcwpw1), mRNA.	1.46088	8.86152
Dmrt2	Mus musculus doublesex and mab-3 related transcription factor 2 (Dmrt2), mRNA.	1.4378	8.86152
Hmgn2	Mus musculus high mobility group nucleosomal binding domain 2 (Hmgn2), mRNA.	1.43704	8.86152
Hmgn2	Mus musculus high mobility group nucleosomal binding domain 2 (Hmgn2), mRNA.	1.43403	8.86152
---	cdna:known chromosome:NCBIM37:5:46805494:46805928:1 gene:ENSMUSG00000067321	1.42188	8.86152
Mgat4b	Mus musculus mannoside acetylglucosaminyltransferase 4, isoenzyme B (Mgat4b), mRNA.	1.40016	8.86152
Fanca	Mus musculus Fanconi anemia, complementation group A (Fanca), mRNA.	1.37238	8.86152
Hist1h4j	Mus musculus histone cluster 1, H4j (Hist1h4j), mRNA.	1.3659	8.86152
---	ncrna:snoRNA chromosome:NCBIM37:12:31943798:31943927:-1 gene:ENSMUSG00000065200	1.35944	8.86152
Dot1l	Histone H3 methyltransferase DOT1 variant a gene:ENSMUSG00000061589	1.34541	8.86152
Ift27	Mus musculus intraflagellar transport 27 homolog (Chlamydomonas) (Ift27), mRNA.	1.34256	8.86152
Celsr2	Mus musculus cadherin, EGF LAG seven-pass G-type receptor 2 (flamingo homolog, Drosophila) (Celsr2), transcript variant 1, mRNA.	1.34146	8.86152
Eno1	Mus musculus enolase 1, alpha non-neuron (Eno1), mRNA.	1.34066	8.86152
Nup210l	Mus musculus nucleoporin 210-like (Nup210l), mRNA.	1.32495	8.86152
Rbp4	Mus musculus retinol binding protein 4, plasma (Rbp4), transcript variant 1, mRNA.	1.30306	8.86152
---	Mus musculus 4.5S RNA (Rn4.5s) on chromosome 6.	1.29638	8.86152
1700040I03Rik	Mus musculus RIKEN cDNA 1700040I03 gene (1700040I03Rik), transcript variant 2, mRNA.	1.28653	8.86152
Mum1	Mus musculus melanoma associated antigen (mutated) 1 (Mum1), mRNA.	1.27425	8.86152
Tfdp1	Mus musculus transcription factor Dp 1 (Tfdp1), mRNA.	1.26337	8.86152
Sf3b5	Mus musculus splicing factor 3b, subunit 5 (Sf3b5), mRNA.	1.24918	8.86152
Ssrp1	Mus musculus structure specific recognition protein 1 (Ssrp1), transcript variant 1, mRNA.	1.23076	8.86152
---	ncrna:rRNA chromosome:NCBIM37:3:51632834:51632950:1 gene:ENSMUSG00000065070	1.22659	8.86152
Slc25a46	Mus musculus solute carrier family 25, member 46 (Slc25a46), mRNA.	1.21353	8.86152
Ndufb8	Mus musculus NADH dehydrogenase (ubiquinone) 1 beta subcomplex 8 (Ndufb8), nuclear gene encoding mitochondrial protein, mRNA.	1.20319	8.86152
Tssc4	Mus musculus tumor-suppressing subchromosomal transferable fragment 4 (Tssc4), transcript variant 1, mRNA.	1.20076	8.86152
Chga	Mus musculus chromogranin A (Chga), mRNA.	3.39291	9.25366
Snord116	Mus musculus Pwcr1 mRNA, complete sequence.	3.07468	9.25366
---	ncrna:snoRNA chromosome:NCBIM37:7:66928831:66928924:-1 gene:ENSMUSG00000075912	3.06471	9.25366
Fscn1	Mus musculus fascin homolog 1, actin bundling protein (Strongylocentrotus purpuratus) (Fscn1), mRNA.	2.76492	9.25366
Rab3c	Mus musculus RAB3C, member RAS oncogene family (Rab3c), mRNA.	2.49792	9.25366
Maneal	Mus musculus mannosidase, endo-alpha-like (Maneal), mRNA.	2.40812	9.25366
Neto2	Mus musculus neuropilin (NRP) and tolloid (TLL)-like 2 (Neto2), mRNA.	2.30164	9.25366
Nuf2	Mus musculus NUF2, NDC80 kinetochore complex component, homolog (S. cerevisiae) (Nuf2), mRNA.	2.24397	9.25366
2810417H13Rik	Mus musculus RIKEN cDNA 2810417H13 gene (2810417H13Rik), mRNA.	2.1813	9.25366
Ttc9	Mus musculus tetratricopeptide repeat domain 9 (Ttc9), mRNA.	2.07012	9.25366
Rrm2	Mus musculus ribonucleotide reductase M2 (Rrm2), mRNA.	2.00851	9.25366
Fbxo5	Mus musculus F-box protein 5 (Fbxo5), mRNA.	1.95516	9.25366
Celf3	Mus musculus VCUGBP, Elav-like family member 3 (Celf3), mRNA.	1.93968	9.25366
Jag2	Mus musculus jagged 2 (Jag2), mRNA.	1.88542	9.25366
Pnmal2	Mus musculus PNMA-like 2 (Pnmal2), mRNA.	1.85018	9.25366
Srrm4	Mus musculus serine/arginine repetitive matrix 4 (Srrm4), mRNA.	1.7832	9.25366
Pdzd4	Mus musculus PDZ domain containing 4 (Pdzd4), mRNA.	1.74139	9.25366
Rgs16	Mus musculus regulator of G-protein signaling 16 (Rgs16), mRNA.	1.71915	9.25366
Gm5465	Mus musculus predicted gene 5465 (Gm5465), mRNA.	1.71632	9.25366
Sox4	Mus musculus SRY-box containing gene 4 (Sox4), mRNA.	1.70972	9.25366
Arhgap19	Mus musculus Rho GTPase activating protein 19 (Arhgap19), transcript variant 1, mRNA.	1.70114	9.25366
---	ncrna:rRNA chromosome:NCBIM37:18:34807054:34807172:1 gene:ENSMUSG00000064857	1.67507	9.25366
Nsl1	Mus musculus NSL1, MIND kinetochore complex component, homolog (S. cerevisiae) (Nsl1), mRNA.	1.6732	9.25366
Ldoc1l	Mus musculus leucine zipper, down-regulated in cancer 1-like (Ldoc1l), mRNA.	1.66925	9.25366
Kcnab2	Mus musculus potassium voltage-gated channel, shaker-related subfamily, beta member 2 (Kcnab2), mRNA.	1.654	9.25366
Tnfaip8l1	Mus musculus tumor necrosis factor, alpha-induced protein 8-like 1 (Tnfaip8l1), mRNA.	1.63815	9.25366
Cep72	Mus musculus centrosomal protein 72 (Cep72), mRNA.	1.63464	9.25366
Cdk5rap2	Mus musculus CDK5 regulatory subunit associated protein 2 (Cdk5rap2), mRNA.	1.63084	9.25366
Bsn	Mus musculus bassoon (Bsn), mRNA.	1.62166	9.25366
B3gat1	Mus musculus beta-1,3-glucuronyltransferase 1 (glucuronosyltransferase P) (B3gat1), mRNA.	1.54822	9.25366
Usp31	Mus musculus ubiquitin specific peptidase 31 (Usp31), mRNA.	1.51726	9.25366
---	ncrna:rRNA chromosome:NCBIM37:17:47985783:47985901:1 gene:ENSMUSG00000064748	1.50753	9.25366
Mpp2	Mus musculus membrane protein, palmitoylated 2 (MAGUK p55 subfamily member 2) (Mpp2), mRNA.	1.48841	9.25366
---	Mus musculus RIKEN cDNA 6030426L16 gene, mRNA (cDNA clone MGC:117729 IMAGE:30937101), complete cds.	1.4788	9.25366
Trib1	Mus musculus tribbles homolog 1 (Drosophila) (Trib1), mRNA.	1.47595	9.25366
Pard6g	Mus musculus par-6 partitioning defective 6 homolog gamma (C. elegans) (Pard6g), mRNA.	1.45603	9.25366
Sema4c	Mus musculus sema domain, immunoglobulin domain (Ig), transmembrane domain (TM) and short cytoplasmic domain, (semaphorin) 4C (Sema4c), mRNA.	1.44653	9.25366
Taf1d	Mus musculus 8 days embryo whole body cDNA, RIKEN full-length enriched library, clone:5730443E18 product:weakly similar to PNAS-104 [Homo sapiens], full insert sequence.	1.44248	9.25366
Rad21	Mus musculus RAD21 homolog (S. pombe) (Rad21), mRNA.	1.4375	9.25366
Rfc3	Mus musculus replication factor C (activator 1) 3 (Rfc3), mRNA.	1.42835	9.25366
Hmgn2	Mus musculus high mobility group nucleosomal binding domain 2 (Hmgn2), mRNA.	1.42244	9.25366
Fzr1	Mus musculus fizzy/cell division cycle 20 related 1 (Drosophila) (Fzr1), mRNA.	1.39519	9.25366
Fcho1	Mus musculus FCH domain only 1 (Fcho1), transcript variant 2, non-coding RNA.	1.38988	9.25366
---	cdna:Genscan chromosome:NCBIM37:17:47067308:47153905:-1	1.37634	9.25366
Fads2	Mus musculus fatty acid desaturase 2 (Fads2), mRNA.	1.36967	9.25366
---	cdna:Genscan chromosome:NCBIM37:13:62398301:62486779:1	1.36431	9.25366
Eno1	Mus musculus enolase 1, alpha non-neuron (Eno1), mRNA.	1.35658	9.25366
2010317E24Rik	Mus musculus RIKEN cDNA 2010317E24 gene (2010317E24Rik), mRNA.	1.31267	9.25366
Gemin8	Mus musculus gem (nuclear organelle) associated protein 8 (Gemin8), mRNA.	1.30496	9.25366
Ccdc67	Mus musculus coiled-coil domain containing 67 (Ccdc67), mRNA.	1.29305	9.25366
---	ncrna:miRNA chromosome:NCBIM37:10:24574591:24574671:-1 gene:ENSMUSG00000089356	1.28991	9.25366
Aars	Mus musculus alanyl-tRNA synthetase (Aars), mRNA.	1.2722	9.25366
Gm10291 // Gm10291	Glyceraldehyde-3-phosphate dehydrogenase gene:ENSMUSG00000070443	1.26718	9.25366
Szt2	Mus musculus seizure threshold 2 (Szt2), mRNA.	1.25704	9.25366
Fdft1	Mus musculus farnesyl diphosphate farnesyl transferase 1 (Fdft1), mRNA.	1.25646	9.25366
Brca2	Mus musculus breast cancer 2 (Brca2), transcript variant 1, mRNA.	1.2564	9.25366
Nacc1	Mus musculus nucleus accumbens associated 1, BEN and BTB (POZ) domain containing (Nacc1), mRNA.	1.25086	9.25366
---	cdna:Genscan chromosome:NCBIM37:5:143918810:143919139:-1	1.24936	9.25366
---	cdna:Genscan chromosome:NCBIM37:12:116784277:116784611:-1	1.22455	9.25366
Limd2	Mus musculus LIM domain containing 2 (Limd2), mRNA.	1.2101	9.25366
Tnfrsf12a	Mus musculus tumor necrosis factor receptor superfamily, member 12a (Tnfrsf12a), transcript variant 1, mRNA.	1.209	9.25366
Fam20c	Mus musculus family with sequence similarity 20, member C (Fam20c), mRNA.	1.20308	9.25366
Nubp1	Mus musculus nucleotide binding protein 1 (Nubp1), mRNA.	1.17063	9.25366
Tceb2	Mus musculus transcription elongation factor B (SIII), polypeptide 2 (Tceb2), mRNA.	1.15911	9.25366
Caln1	Mus musculus calneuron 1 (Caln1), transcript variant 1, mRNA.	3.25401	10.4719
Ina	Mus musculus internexin neuronal intermediate filament protein, alpha (Ina), mRNA.	3.02004	10.4719
Hcn1	Mus musculus hyperpolarization-activated, cyclic nucleotide-gated K+ 1 (Hcn1), mRNA.	3.01142	10.4719
Snord116	Mus musculus Pwcr1 mRNA, complete sequence.	2.93769	10.4719
Snord116	Mus musculus small nucleolar RNA, C/D box 116 cluster (Snord116), small nucleolar RNA.	2.92947	10.4719
Snord116	Mus musculus Pwcr1 mRNA, complete sequence.	2.90641	10.4719
Snord116	Mus musculus Pwcr1 mRNA, complete sequence.	2.90641	10.4719
Snord116	Mus musculus Pwcr1 mRNA, complete sequence.	2.90641	10.4719
Snord116	Mus musculus small nucleolar RNA, C/D box 116 cluster (Snord116), small nucleolar RNA.	2.90641	10.4719
Snord116	Mus musculus small nucleolar RNA, C/D box 116 cluster (Snord116), small nucleolar RNA.	2.90641	10.4719
Snord116	Mus musculus small nucleolar RNA, C/D box 116 cluster (Snord116), small nucleolar RNA.	2.90641	10.4719
Snord116	Mus musculus small nucleolar RNA, C/D box 116 cluster (Snord116), small nucleolar RNA.	2.90641	10.4719
Snord116	Mus musculus small nucleolar RNA, C/D box 116 cluster (Snord116), small nucleolar RNA.	2.90641	10.4719
Snord116	Mus musculus small nucleolar RNA, C/D box 116 cluster (Snord116), small nucleolar RNA.	2.90641	10.4719
Snord116	Mus musculus small nucleolar RNA, C/D box 116 cluster (Snord116), small nucleolar RNA.	2.90641	10.4719
Snord116	Mus musculus small nucleolar RNA, C/D box 116 cluster (Snord116), small nucleolar RNA.	2.90641	10.4719
Snord116	Mus musculus small nucleolar RNA, C/D box 116 cluster (Snord116), small nucleolar RNA.	2.90641	10.4719
Snord116	Mus musculus small nucleolar RNA, C/D box 116 cluster (Snord116), small nucleolar RNA.	2.90641	10.4719
Snord116	Mus musculus small nucleolar RNA, C/D box 116 cluster (Snord116), small nucleolar RNA.	2.90641	10.4719
Snord116	Mus musculus small nucleolar RNA, C/D box 116 cluster (Snord116), small nucleolar RNA.	2.90641	10.4719
Snord116	Mus musculus small nucleolar RNA, C/D box 116 cluster (Snord116), small nucleolar RNA.	2.90641	10.4719
Snord116	Mus musculus small nucleolar RNA, C/D box 116 cluster (Snord116), small nucleolar RNA.	2.90641	10.4719
Snord116	Mus musculus small nucleolar RNA, C/D box 116 cluster (Snord116), small nucleolar RNA.	2.90641	10.4719
Apba2	Mus musculus amyloid beta (A4) precursor protein-binding, family A, member 2 (Apba2), mRNA.	2.82048	10.4719
Amph	Mus musculus amphiphysin (Amph), mRNA.	2.60591	10.4719
Syn2	Mus musculus synapsin II (Syn2), transcript variant IIa, mRNA.	2.57765	10.4719
Myt1	Mus musculus myelin transcription factor 1 (Myt1), transcript variant 1, mRNA.	2.39296	10.4719
Rundc3a	Mus musculus RUN domain containing 3A (Rundc3a), mRNA.	2.25867	10.4719
Tube1	Mus musculus epsilon-tubulin 1 (Tube1), mRNA.	2.14475	10.4719
Nt5dc2	Mus musculus 5'-nucleotidase domain containing 2 (Nt5dc2), mRNA.	2.05518	10.4719
Acot7	Mus musculus acyl-CoA thioesterase 7 (Acot7), transcript variant 2, mRNA.	2.01738	10.4719
Cpe	Mus musculus carboxypeptidase E (Cpe), mRNA.	1.95653	10.4719
Nol4	Mus musculus nucleolar protein 4 (Nol4), transcript variant 2, mRNA.	1.88638	10.4719
Stil	Mus musculus Scl/Tal1 interrupting locus (Stil), mRNA.	1.86808	10.4719
Mastl	Mus musculus microtubule associated serine/threonine kinase-like (Mastl), mRNA.	1.8476	10.4719
Fgf13	Mus musculus fibroblast growth factor 13 (Fgf13), mRNA.	1.84398	10.4719
Sbk1	Mus musculus SH3-binding kinase 1 (Sbk1), mRNA.	1.84325	10.4719
Cyp2u1	Mus musculus cytochrome P450, family 2, subfamily u, polypeptide 1 (Cyp2u1), mRNA.	1.83321	10.4719
Gng4	Mus musculus guanine nucleotide binding protein (G protein), gamma 4 (Gng4), mRNA.	1.83046	10.4719
Pcbp4	Mus musculus poly(rC) binding protein 4 (Pcbp4), mRNA.	1.82799	10.4719
Lrrc8b	Mus musculus leucine rich repeat containing 8 family, member B (Lrrc8b), mRNA.	1.80621	10.4719
Dusp8	Mus musculus dual specificity phosphatase 8 (Dusp8), mRNA.	1.7885	10.4719
Rad51ap1	Mus musculus RAD51 associated protein 1 (Rad51ap1), mRNA.	1.7697	10.4719
Fam54a	Mus musculus family with sequence similarity 54, member A (Fam54a), mRNA.	1.76694	10.4719
Bex2	Mus musculus brain expressed X-linked 2 (Bex2), mRNA.	1.76683	10.4719
Hist1h2aa	Mus musculus histone cluster 1, H2aa (Hist1h2aa), mRNA.	1.74684	10.4719
Cenpe	Mus musculus centromere protein E (Cenpe), mRNA.	1.74326	10.4719
Hcn2	Mus musculus hyperpolarization-activated, cyclic nucleotide-gated K+ 2 (Hcn2), mRNA.	1.71817	10.4719
4931428F04Rik	Mus musculus RIKEN cDNA 4931428F04 gene (4931428F04Rik), transcript variant 1, mRNA.	1.7007	10.4719
E2f2	Mus musculus E2F transcription factor 2 (E2f2), mRNA.	1.69319	10.4719
Brca1	Mus musculus breast cancer 1 (Brca1), mRNA.	1.68078	10.4719
Srl	Mus musculus sarcalumenin (Srl), mRNA.	1.67612	10.4719
Fam83d	Mus musculus family with sequence similarity 83, member D, mRNA (cDNA clone MGC:92947 IMAGE:6411705), complete cds.	1.66551	10.4719
BC030867	Mus musculus cDNA sequence BC030867 (BC030867), mRNA.	1.66276	10.4719
Chn1	Mus musculus chimerin (chimaerin) 1 (Chn1), transcript variant 3, mRNA.	1.62419	10.4719
Nrxn2	Mus musculus neurexin II (Nrxn2), mRNA.	1.62258	10.4719
Pcyt1b	Mus musculus phosphate cytidylyltransferase 1, choline, beta isoform (Pcyt1b), transcript variant 1, mRNA.	1.60612	10.4719
E2f1	Mus musculus E2F transcription factor 1 (E2f1), mRNA.	1.54981	10.4719
Plxnb1	Mus musculus plexin B1 (Plxnb1), mRNA.	1.54319	10.4719
Rps6ka2	Mus musculus ribosomal protein S6 kinase, polypeptide 2 (Rps6ka2), mRNA.	1.53493	10.4719
Rangap1	Mus musculus RAN GTPase activating protein 1 (Rangap1), transcript variant 1, mRNA.	1.48988	10.4719
Gpr137c	Mus musculus G protein-coupled receptor 137C (Gpr137c), mRNA.	1.48843	10.4719
Hmgcs1	Mus musculus 3-hydroxy-3-methylglutaryl-Coenzyme A synthase 1 (Hmgcs1), mRNA.	1.45996	10.4719
2700094K13Rik	Mus musculus RIKEN cDNA 2700094K13 gene (2700094K13Rik), transcript variant 1, mRNA.	1.45311	10.4719
5730528L13Rik	Mus musculus RIKEN cDNA 5730528L13 gene (5730528L13Rik), transcript variant 1, mRNA.	1.4364	10.4719
Cdk5r1	Mus musculus cyclin-dependent kinase 5, regulatory subunit 1 (p35) (Cdk5r1), mRNA.	1.43492	10.4719
Arl6ip1	Mus musculus ADP-ribosylation factor-like 6 interacting protein 1 (Arl6ip1), mRNA.	1.41043	10.4719
---	cdna:known chromosome:NCBIM37:2:26767712:26768838:1 gene:ENSMUSG00000062647	1.40915	10.4719
---	cdna:known chromosome:NCBIM37:X:138304675:138304947:-1 gene:ENSMUSG00000085466	1.40463	10.4719
Jun	Mus musculus Jun oncogene (Jun), mRNA.	1.40406	10.4719
Rgs12	Mus musculus regulator of G-protein signaling 12 (Rgs12), transcript variant 1, mRNA.	1.40387	10.4719
Nup210	Mus musculus nucleoporin 210 (Nup210), mRNA.	1.3977	10.4719
Zbtb12	Mus musculus zinc finger and BTB domain containing 12 (Zbtb12), mRNA.	1.38638	10.4719
Usp49	Mus musculus ubiquitin specific peptidase 49 (Usp49), mRNA.	1.38582	10.4719
Mcm2	Mus musculus minichromosome maintenance deficient 2 mitotin (S. cerevisiae) (Mcm2), mRNA.	1.37158	10.4719
Chchd4	Mus musculus coiled-coil-helix-coiled-coil-helix domain containing 4 (Chchd4), nuclear gene encoding mitochondrial protein, mRNA.	1.3491	10.4719
Irs2	Mus musculus insulin receptor substrate 2 (Irs2), mRNA.	1.34578	10.4719
Fus	Mus musculus fusion, derived from t(12;16) malignant liposarcoma (human) (Fus), mRNA.	1.341	10.4719
Dhx30	Mus musculus DEAH (Asp-Glu-Ala-His) box polypeptide 30 (Dhx30), mRNA.	1.32992	10.4719
Rnu1b1	Mus musculus U1b1 small nuclear RNA (Rnu1b1), small nuclear RNA.	1.31266	10.4719
Rnu1b1	Mus musculus U1b1 small nuclear RNA (Rnu1b1), small nuclear RNA.	1.31266	10.4719
Rnu1b1	Mus musculus U1b1 small nuclear RNA (Rnu1b1), small nuclear RNA.	1.31266	10.4719
1500010J02Rik	Mus musculus RIKEN cDNA 1500010J02 gene (1500010J02Rik), transcript variant 2, non-coding RNA.	1.3097	10.4719
Rnu1b1	Mus musculus U1b1 small nuclear RNA (Rnu1b1), small nuclear RNA.	1.30813	10.4719
Ado	Mus musculus 2-aminoethanethiol (cysteamine) dioxygenase (Ado), mRNA.	1.30146	10.4719
2010007H12Rik	Mus musculus RIKEN cDNA 2010007H12 gene, mRNA (cDNA clone MGC:62925 IMAGE:1429227), complete cds.	1.29432	10.4719
Ndufb7	Mus musculus NADH dehydrogenase (ubiquinone) 1 beta subcomplex, 7 (Ndufb7), nuclear gene encoding mitochondrial protein, mRNA.	1.2869	10.4719
Ptma	Mus musculus prothymosin alpha (Ptma), mRNA.	1.28335	10.4719
Cbx2	Mus musculus chromobox homolog 2 (Drosophila Pc class) (Cbx2), mRNA.	1.28283	10.4719
Nup188	Mus musculus nucleoporin 188 (Nup188), mRNA.	1.2811	10.4719
Grm2	Mus musculus glutamate receptor, metabotropic 2 (Grm2), mRNA.	1.28004	10.4719
Tdg	Mus musculus thymine DNA glycosylase (Tdg), transcript variant 1, mRNA.	1.27675	10.4719
Ints1	Mus musculus integrator complex subunit 1 (Ints1), mRNA.	1.27477	10.4719
Mrto4	Mus musculus MRT4, mRNA turnover 4, homolog (S. cerevisiae) (Mrto4), mRNA.	1.26479	10.4719
Tubb6	Mus musculus tubulin, beta 6 (Tubb6), mRNA.	1.26444	10.4719
Gm2451	similar to Glyceraldehyde-3-phosphate dehydrogenase (GAPDH) isoform 1 gene:ENSMUSG00000078573	1.25418	10.4719
Dusp18	Mus musculus dual specificity phosphatase 18 (Dusp18), mRNA.	1.25013	10.4719
Rnf126	Mus musculus ring finger protein 126 (Rnf126), transcript variant 1, mRNA.	1.24801	10.4719
Cfl1	Mus musculus cofilin 1, non-muscle (Cfl1), mRNA.	1.24268	10.4719
Ccdc22	Mus musculus coiled-coil domain containing 22 (Ccdc22), mRNA.	1.24206	10.4719
Mcm6	Mus musculus minichromosome maintenance deficient 6 (MIS5 homolog, S. pombe) (S. cerevisiae) (Mcm6), mRNA.	1.24	10.4719
Mif	Mus musculus macrophage migration inhibitory factor (Mif), mRNA.	1.23964	10.4719
Mif	Mus musculus macrophage migration inhibitory factor (Mif), mRNA.	1.23855	10.4719
Foxk2	Mus musculus forkhead box K2 (Foxk2), mRNA.	1.23684	10.4719
---	ncrna:rRNA chromosome:NCBIM37:1:27015948:27016066:-1 gene:ENSMUSG00000065125	1.2212	10.4719
Rbm15b	Mus musculus RNA binding motif protein 15B (Rbm15b), mRNA.	1.22035	10.4719
Wsb2	Mus musculus WD repeat and SOCS box-containing 2 (Wsb2), mRNA.	1.21813	10.4719
Tjap1	Mus musculus tight junction associated protein 1 (Tjap1), mRNA.	1.2177	10.4719
Nhp2l1	Mus musculus NHP2 non-histone chromosome protein 2-like 1 (S. cerevisiae) (Nhp2l1), mRNA.	1.20685	10.4719
Nhp2l1	Mus musculus NHP2 non-histone chromosome protein 2-like 1 (S. cerevisiae) (Nhp2l1), mRNA.	1.20639	10.4719
Rprl2	Mus musculus ribonuclease P RNA-like 2 (Rprl2), RNase P RNA.	1.1946	10.4719
Uqcrq	Mus musculus ubiquinol-cytochrome c reductase, complex III subunit VII (Uqcrq), nuclear gene encoding mitochondrial protein, mRNA.	1.19347	10.4719
H2-M10.4	Mus musculus histocompatibility 2, M region locus 10.4 (H2-M10.4), mRNA.	1.19111	10.4719
Timm13	Mus musculus translocase of inner mitochondrial membrane 13 homolog (yeast) (Timm13), nuclear gene encoding mitochondrial protein, mRNA.	1.189	10.4719
Znhit3	Mus musculus zinc finger, HIT type 3 (Znhit3), mRNA.	1.1876	10.4719
Nol12	Mus musculus nucleolar protein 12 (Nol12), mRNA.	1.18178	10.4719
---	Mus musculus steroid sulfatase (Sts), mRNA	1.17254	10.4719
Zfp341	Mus musculus zinc finger protein 341 (Zfp341), mRNA.	1.16874	10.4719
---	ncrna:rRNA chromosome:NCBIM37:1:82631588:82631685:1 gene:ENSMUSG00000065055	1.1665	10.4719
Zfp191	Mus musculus zinc finger protein 191 (Zfp191), mRNA.	1.1574	10.4719
---	ncrna:snoRNA chromosome:NCBIM37:3:89930457:89930588:1 gene:ENSMUSG00000064930	1.15724	10.4719
Prox1	Mus musculus prospero-related homeobox 1 (Prox1), mRNA.	3.53385	10.8705
Scg3	Mus musculus secretogranin III (Scg3), transcript variant 1, mRNA.	3.32333	10.8705
Ddc	Mus musculus dopa decarboxylase (Ddc), transcript variant 1, mRNA.	3.16475	10.8705
Ina	Alpha-internexin gene:ENSMUSG00000034336	3.15243	10.8705
Gabrb3	Mus musculus gamma-aminobutyric acid (GABA) A receptor, subunit beta 3 (Gabrb3), transcript variant 1, mRNA.	3.07056	10.8705
Pax9	Mus musculus paired box gene 9 (Pax9), mRNA.	3.06171	10.8705
A730017C20Rik	Mus musculus RIKEN cDNA A730017C20 gene (A730017C20Rik), transcript variant 4, non-coding RNA.	2.93634	10.8705
Cacna2d3	Mus musculus calcium channel, voltage-dependent, alpha2/delta subunit 3 (Cacna2d3), mRNA.	2.85876	10.8705
---	ncrna:snoRNA chromosome:NCBIM37:7:66936425:66936518:-1 gene:ENSMUSG00000075979	2.83095	10.8705
Trank1	Mus musculus tetratricopeptide repeat and ankyrin repeat containing 1 (Trank1), mRNA.	2.78829	10.8705
Phyhipl	Mus musculus phytanoyl-CoA hydroxylase interacting protein-like (Phyhipl), transcript variant 1, mRNA.	2.77223	10.8705
---	ncrna:snoRNA chromosome:NCBIM37:7:66948590:66948683:-1 gene:ENSMUSG00000075758	2.74652	10.8705
Gpr98	Mus musculus G protein-coupled receptor 98 (Gpr98), mRNA.	2.67554	10.8705
Dpysl5	Mus musculus dihydropyrimidinase-like 5 (Dpysl5), mRNA.	2.61724	10.8705
Crmp1	Mus musculus collapsin response mediator protein 1 (Crmp1), transcript variant 2, mRNA.	2.60199	10.8705
Slc7a14	Mus musculus solute carrier family 7 (cationic amino acid transporter, y+ system), member 14 (Slc7a14), mRNA.	2.55145	10.8705
Nrxn1	Mus musculus neurexin I (Nrxn1), transcript variant 1, mRNA.	2.50837	10.8705
Cntn4	Mus musculus contactin 4 (Cntn4), transcript variant 1, mRNA.	2.50416	10.8705
Trank1	Mus musculus tetratricopeptide repeat and ankyrin repeat containing 1 (Trank1), mRNA.	2.4881	10.8705
Celsr3	Mus musculus cadherin, EGF LAG seven-pass G-type receptor 3 (flamingo homolog, Drosophila) (Celsr3), mRNA.	2.47602	10.8705
St8sia5	Mus musculus ST8 alpha-N-acetyl-neuraminide alpha-2,8-sialyltransferase 5 (St8sia5), transcript variant 1, mRNA.	2.47306	10.8705
Chd7	Mus musculus chromodomain helicase DNA binding protein 7 (Chd7), mRNA.	2.46611	10.8705
Stxbp5l	Mus musculus syntaxin binding protein 5-like (Stxbp5l), transcript variant xb, mRNA.	2.46062	10.8705
Uchl1	Mus musculus ubiquitin carboxy-terminal hydrolase L1 (Uchl1), mRNA.	2.45407	10.8705
Trim67	Mus musculus tripartite motif-containing 67 (Trim67), mRNA.	2.35312	10.8705
Clstn3	Mus musculus calsyntenin 3 (Clstn3), mRNA.	2.32528	10.8705
Gm5607	Mus musculus predicted gene 5607 (Gm5607), non-coding RNA.	2.3095	10.8705
Tubb4	Mus musculus tubulin, beta 4 (Tubb4), mRNA.	2.30703	10.8705
Chd7	Mus musculus chromodomain helicase DNA binding protein 7 (Chd7), mRNA.	2.29661	10.8705
Dnajc6	Mus musculus DnaJ (Hsp40) homolog, subfamily C, member 6 (Dnajc6), transcript variant 3, mRNA.	2.26781	10.8705
Elovl2	Mus musculus elongation of very long chain fatty acids (FEN1/Elo2, SUR4/Elo3, yeast)-like 2 (Elovl2), mRNA.	2.24691	10.8705
Nsg1	Mus musculus neuron specific gene family member 1 (Nsg1), mRNA.	2.24192	10.8705
Gdap1l1	Mus musculus ganglioside-induced differentiation-associated protein 1-like 1 (Gdap1l1), mRNA.	2.20752	10.8705
9330182L06Rik	Mus musculus RIKEN cDNA 9330182L06 gene, mRNA (cDNA clone MGC:163921 IMAGE:40130567), complete cds.	2.19597	10.8705
Syn1	Mus musculus synapsin I (Syn1), transcript variant a, mRNA.	2.19208	10.8705
Mtmr7	Mus musculus myotubularin related protein 7 (Mtmr7), mRNA.	2.17141	10.8705
---	cdna:known chromosome:NCBIM37:5:77086746:77219161:1 gene:ENSMUSG00000036377	2.15306	10.8705
Pcdhb2	Mus musculus protocadherin beta 2 (Pcdhb2), mRNA.	2.13792	10.8705
Elavl2	Mus musculus ELAV (embryonic lethal, abnormal vision, Drosophila)-like 2 (Hu antigen B) (Elavl2), transcript variant 1, mRNA.	2.13262	10.8705
Ap3b2	Mus musculus adaptor-related protein complex 3, beta 2 subunit (Ap3b2), mRNA.	2.10073	10.8705
Syt9	Mus musculus synaptotagmin IX (Syt9), mRNA.	2.07345	10.8705
Syt5	Mus musculus synaptotagmin V (Syt5), mRNA.	2.05893	10.8705
Plxna2	Mus musculus plexin A2 (Plxna2), mRNA.	2.05833	10.8705
Brsk2	Mus musculus BR serine/threonine kinase 2 (Brsk2), transcript variant 1, mRNA.	2.05512	10.8705
Slit1	Mus musculus slit homolog 1 (Drosophila) (Slit1), mRNA.	2.04039	10.8705
Pcdh10	Mus musculus protocadherin 10 (Pcdh10), transcript variant 3, mRNA.	2.0393	10.8705
Vash2	Mus musculus vasohibin 2 (Vash2), transcript variant 2, non-coding RNA.	2.03822	10.8705
Sez6l2	Mus musculus seizure related 6 homolog like 2 (Sez6l2), mRNA.	2.02365	10.8705
Tox	Mus musculus thymocyte selection-associated high mobility group box (Tox), mRNA.	2.01212	10.8705
Unc13a	Mus musculus unc-13 homolog A (C. elegans) (Unc13a), mRNA.	2.01194	10.8705
Kif18a	Mus musculus kinesin family member 18A (Kif18a), mRNA.	1.99096	10.8705
Ptprn2	Mus musculus protein tyrosine phosphatase, receptor type, N polypeptide 2 (Ptprn2), mRNA.	1.98862	10.8705
Pclo	Mus musculus piccolo (presynaptic cytomatrix protein) (Pclo), transcript variant 1, mRNA.	1.975	10.8705
Elovl6	Mus musculus ELOVL family member 6, elongation of long chain fatty acids (yeast) (Elovl6), mRNA.	1.97308	10.8705
Grm8	Mus musculus glutamate receptor, metabotropic 8 (Grm8), mRNA.	1.97181	10.8705
Atp2b2	Mus musculus ATPase, Ca++ transporting, plasma membrane 2 (Atp2b2), transcript variant 1, mRNA.	1.90811	10.8705
Cenpp	Mus musculus centromere protein P (Cenpp), mRNA.	1.89665	10.8705
Smpd3	Mus musculus sphingomyelin phosphodiesterase 3, neutral (Smpd3), mRNA.	1.88306	10.8705
Apcdd1	Mus musculus adenomatosis polyposis coli down-regulated 1 (Apcdd1), mRNA.	1.86515	10.8705
Spock1	Mus musculus sparc/osteonectin, cwcv and kazal-like domains proteoglycan 1 (Spock1), transcript variant 1, mRNA.	1.8623	10.8705
6330503K22Rik	Mus musculus RIKEN cDNA 6330503K22 gene (6330503K22Rik), mRNA.	1.84952	10.8705
Fmn2	Mus musculus formin 2 (Fmn2), mRNA.	1.82792	10.8705
Gprin1	Mus musculus G protein-regulated inducer of neurite outgrowth 1 (Gprin1), mRNA.	1.82746	10.8705
Ica1l	Mus musculus islet cell autoantigen 1-like (Ica1l), mRNA.	1.8037	10.8705
Kcnc1	Mus musculus potassium voltage gated channel, Shaw-related subfamily, member 1 (Kcnc1), transcript variant B, mRNA.	1.78931	10.8705
Odz1	Mus musculus odd Oz/ten-m homolog 1 (Drosophila) (Odz1), mRNA.	1.78527	10.8705
Magi2	Mus musculus membrane associated guanylate kinase, WW and PDZ domain containing 2 (Magi2), transcript variant 1, mRNA.	1.78409	10.8705
Ctxn1	Mus musculus cortexin 1 (Ctxn1), mRNA.	1.76124	10.8705
Cd5l	Mus musculus CD5 antigen-like (Cd5l), mRNA.	1.73513	10.8705
Add2	Mus musculus adducin 2 (beta) (Add2), mRNA.	1.73188	10.8705
Terc	Mus musculus telomerase RNA component (Terc), telomerase RNA.	1.68893	10.8705
Bcl6b	Mus musculus B-cell CLL/lymphoma 6, member B (Bcl6b), mRNA.	1.68352	10.8705
Ska1	Mus musculus spindle and kinetochore associated complex subunit 1 (Ska1), transcript variant 1, mRNA.	1.68278	10.8705
Bai1	Mus musculus brain-specific angiogenesis inhibitor 1 (Bai1), mRNA.	1.66759	10.8705
Stox1	Mus musculus storkhead box 1 (Stox1), mRNA.	1.64532	10.8705
Als2cr4	Mus musculus amyotrophic lateral sclerosis 2 (juvenile) chromosome region, candidate 4 (Als2cr4), transcript variant 1, mRNA.	1.64112	10.8705
Pask	Mus musculus PAS domain containing serine/threonine kinase (Pask), mRNA.	1.62799	10.8705
Gpx2	Mus musculus glutathione peroxidase 2 (Gpx2), mRNA.	1.62116	10.8705
Cacng4	Mus musculus calcium channel, voltage-dependent, gamma subunit 4 (Cacng4), mRNA.	1.61364	10.8705
8430427H17Rik	Mus musculus RIKEN cDNA 8430427H17 gene (8430427H17Rik), transcript variant 2, mRNA.	1.61185	10.8705
Nol3	Mus musculus nucleolar protein 3 (apoptosis repressor with CARD domain) (Nol3), mRNA.	1.61148	10.8705
Vangl2	Mus musculus vang-like 2 (van gogh, Drosophila) (Vangl2), mRNA.	1.58976	10.8705
Rgs9	Mus musculus regulator of G-protein signaling 9 (Rgs9), transcript variant 1, mRNA.	1.58178	10.8705
Uck2	Mus musculus uridine-cytidine kinase 2 (Uck2), mRNA.	1.57323	10.8705
Ksr2	Mus musculus kinase suppressor of ras 2 (Ksr2), transcript variant 1, mRNA.	1.56737	10.8705
2011-03-04	Mus musculus membrane-associated ring finger (C3HC4) 4 (March4), mRNA.	1.56186	10.8705
Rap1gap2	Mus musculus RAP1 GTPase activating protein 2 (Rap1gap2), mRNA.	1.55872	10.8705
Dusp6	Mus musculus dual specificity phosphatase 6 (Dusp6), mRNA.	1.55785	10.8705
Slc39a6	Mus musculus solute carrier family 39 (metal ion transporter), member 6 (Slc39a6), mRNA.	1.54657	10.8705
Rad54b	Mus musculus RAD54 homolog B (S. cerevisiae) (Rad54b), mRNA.	1.54535	10.8705
2610002D18Rik	Mus musculus RIKEN cDNA 2610002D18 gene, mRNA (cDNA clone MGC:169895 IMAGE:8861290), complete cds.	1.53986	10.8705
Pcdhb11	Mus musculus protocadherin beta 11 (Pcdhb11), mRNA.	1.53758	10.8705
Prrt3	Mus musculus proline-rich transmembrane protein 3 (Prrt3), mRNA.	1.53604	10.8705
Pif1	Mus musculus PIF1 5'-to-3' DNA helicase homolog (S. cerevisiae) (Pif1), mRNA.	1.53377	10.8705
Bex4	Mus musculus brain expressed gene 4 (Bex4), mRNA.	1.52872	10.8705
Tmem108	Mus musculus transmembrane protein 108 (Tmem108), mRNA.	1.51823	10.8705
Hist3h2bb-ps	Mus musculus histone cluster 3, H2bb, pseudogene (Hist3h2bb-ps), mRNA.	1.50641	10.8705
Hmgb3	Mus musculus high mobility group box 3 (Hmgb3), mRNA.	1.5025	10.8705
Bok	Mus musculus BCL2-related ovarian killer protein (Bok), mRNA.	1.50233	10.8705
Oscp1	Mus musculus organic solute carrier partner 1 (Oscp1), mRNA.	1.47786	10.8705
Tmem231	Mus musculus transmembrane protein 231 (Tmem231), mRNA.	1.47392	10.8705
Cisd1	Mus musculus CDGSH iron sulfur domain 1 (Cisd1), mRNA.	1.46876	10.8705
Dcakd	Mus musculus dephospho-CoA kinase domain containing (Dcakd), mRNA.	1.46875	10.8705
Ppp1r8	Mus musculus protein phosphatase 1, regulatory (inhibitor) subunit 8 (Ppp1r8), mRNA.	1.46683	10.8705
Wdr6	Mus musculus WD repeat domain 6 (Wdr6), mRNA.	1.46605	10.8705
Vstm2b	Mus musculus V-set and transmembrane domain containing 2B (Vstm2b), mRNA.	1.45972	10.8705
---	cdna:Genscan chromosome:NCBIM37:12:22146995:22153566:-1	1.45824	10.8705
---	cdna:Genscan chromosome:NCBIM37:13:85574102:85713183:-1	1.45299	10.8705
1110051M20Rik	Mus musculus RIKEN cDNA 1110051M20 gene, mRNA (cDNA clone MGC:103036 IMAGE:6440075), complete cds.	1.44704	10.8705
Cib2	Mus musculus calcium and integrin binding family member 2 (Cib2), mRNA.	1.44663	10.8705
Mpdz	Mus musculus multiple PDZ domain protein (Mpdz), mRNA.	1.44494	10.8705
4930422G04Rik	Mus musculus RIKEN cDNA 4930422G04 gene (4930422G04Rik), mRNA.	1.44348	10.8705
Ccne1	Mus musculus cyclin E1 (Ccne1), mRNA.	1.43264	10.8705
---	cdna:Genscan chromosome:NCBIM37:18:82507959:82509208:1	1.4224	10.8705
Xkr7	Mus musculus X Kell blood group precursor related family member 7 homolog (Xkr7), mRNA.	1.42164	10.8705
Xkr6	Mus musculus X Kell blood group precursor related family member 6 homolog (Xkr6), mRNA.	1.41972	10.8705
Thrsp	Mus musculus thyroid hormone responsive SPOT14 homolog (Rattus) (Thrsp), mRNA.	1.40928	10.8705
Tubg1	Mus musculus tubulin, gamma 1 (Tubg1), mRNA.	1.39185	10.8705
1500011H22Rik	Mus musculus RIKEN cDNA 1500011H22 gene, mRNA (cDNA clone MGC:27542 IMAGE:4460879), complete cds.	1.38967	10.8705
Ankle1	Mus musculus ankyrin repeat and LEM domain containing 1 (Ankle1), mRNA.	1.37791	10.8705
Igsf3	Mus musculus immunoglobulin superfamily, member 3 (Igsf3), mRNA.	1.37475	10.8705
Thoc4	Mus musculus THO complex 4 (Thoc4), mRNA.	1.36856	10.8705
Calm2	Mus musculus calmodulin 2 (Calm2), mRNA.	1.36845	10.8705
Hist3h2a	Mus musculus histone cluster 3, H2a (Hist3h2a), mRNA.	1.36554	10.8705
---	cdna:pseudogene chromosome:NCBIM37:2:151284692:151286045:1 gene:ENSMUSG00000082809	1.36169	10.8705
Lrp4	Mus musculus low density lipoprotein receptor-related protein 4 (Lrp4), transcript variant 1, mRNA.	1.35814	10.8705
Zc3h7b	Mus musculus zinc finger CCCH type containing 7B (Zc3h7b), mRNA.	1.35427	10.8705
Sstr2	Mus musculus somatostatin receptor 2 (Sstr2), transcript variant 2, mRNA.	1.35047	10.8705
Syt7	Mus musculus synaptotagmin VII (Syt7), transcript variant 3, mRNA.	1.34227	10.8705
Apitd1	Mus musculus apoptosis-inducing, TAF9-like domain 1 (Apitd1), mRNA.	1.33428	10.8705
Bex1	Mus musculus brain expressed gene 1 (Bex1), mRNA.	1.33412	10.8705
Mcrs1	Mus musculus visual cortex cDNA, RIKEN full-length enriched library, clone:K230027M21 product:microspherule protein 1, full insert sequence.	1.33327	10.8705
Gm5577	Mus musculus predicted gene 5577 (Gm5577), non-coding RNA.	1.32879	10.8705
Nup93	Mus musculus nucleoporin 93 (Nup93), mRNA.	1.32166	10.8705
Pogk	Mus musculus pogo transposable element with KRAB domain (Pogk), transcript variant 1, mRNA.	1.31761	10.8705
Ak4	Mus musculus adenylate kinase 4 (Ak4), nuclear gene encoding mitochondrial protein, transcript variant 1, mRNA.	1.30589	10.8705
Chchd6	Mus musculus coiled-coil-helix-coiled-coil-helix domain containing 6 (Chchd6), transcript variant 1, mRNA.	1.30028	10.8705
Snn	Mus musculus stannin (Snn), mRNA.	1.30018	10.8705
Gsk3a	Mus musculus glycogen synthase kinase 3 alpha (Gsk3a), mRNA.	1.29821	10.8705
5930416I19Rik	Mus musculus RIKEN cDNA 5930416I19 gene (5930416I19Rik), transcript variant 1, non-coding RNA.	1.29325	10.8705
Nup62	Mus musculus nucleoporin 62 (Nup62), mRNA.	1.29266	10.8705
Ints7	Mus musculus integrator complex subunit 7 (Ints7), mRNA.	1.28877	10.8705
Rnu73b	Mus musculus U73B small nuclear RNA (Rnu73b), small nuclear RNA.	1.2869	10.8705
Hdac6	Mus musculus histone deacetylase 6 (Hdac6), transcript variant 1, mRNA.	1.28537	10.8705
Actr1a	Mus musculus ARP1 actin-related protein 1 homolog A, centractin alpha (yeast) (Actr1a), mRNA.	1.28321	10.8705
Stx1a	Mus musculus syntaxin 1A (brain) (Stx1a), mRNA.	1.28171	10.8705
Nme1	Mus musculus non-metastatic cells 1, protein (NM23A) expressed in (Nme1), mRNA.	1.28143	10.8705
---	cdna:Genscan chromosome:NCBIM37:5:11192523:11193470:1	1.27643	10.8705
Gemin6	Mus musculus gem (nuclear organelle) associated protein 6 (Gemin6), mRNA.	1.26796	10.8705
---	cdna:Genscan chromosome:NCBIM37:5:11255905:11266326:1	1.26784	10.8705
Ptma	Mus musculus prothymosin alpha (Ptma), mRNA.	1.26388	10.8705
Ptma	Mus musculus prothymosin alpha (Ptma), mRNA.	1.26319	10.8705
---	cdna:Genscan chromosome:NCBIM37:17:36363757:36408635:-1	1.26305	10.8705
Ppp2r4	Mus musculus protein phosphatase 2A, regulatory subunit B (PR 53) (Ppp2r4), mRNA.	1.26047	10.8705
Ppm1g	Mus musculus protein phosphatase 1G (formerly 2C), magnesium-dependent, gamma isoform (Ppm1g), mRNA.	1.26046	10.8705
Ddx39	Mus musculus DEAD (Asp-Glu-Ala-Asp) box polypeptide 39 (Ddx39), mRNA.	1.25971	10.8705
Snord15b	Mus musculus small nucleolar RNA, C/D box 14B (Snord15b), small nucleolar RNA.	1.25841	10.8705
Tmem63b	Mus musculus transmembrane protein 63b (Tmem63b), mRNA.	1.25139	10.8705
1600002H07Rik	Mus musculus RIKEN cDNA 1600002H07 gene, mRNA (cDNA clone MGC:99862 IMAGE:6414405), complete cds.	1.25106	10.8705
Mdc1	Mus musculus mediator of DNA damage checkpoint 1 (Mdc1), mRNA.	1.24854	10.8705
Fev	Mus musculus FEV (ETS oncogene family) (Fev), mRNA.	1.24848	10.8705
Aarsd1	Mus musculus alanyl-tRNA synthetase domain containing 1 (Aarsd1), mRNA.	1.24113	10.8705
---	Mus musculus cDNA, clone:Y0G0144O14, strand:plus, reference:ENSEMBL:Mouse-Transcript-ENST:ENSMUST00000070038, based on BLAT search.	1.24105	10.8705
D930028M14Rik	Putative uncharacterized protein gene:ENSMUSG00000074274	1.23905	10.8705
Ptges2	Mus musculus prostaglandin E synthase 2 (Ptges2), mRNA.	1.23645	10.8705
Gm4609	similar to Glyceraldehyde-3-phosphate dehydrogenase (GAPDH) isoform 1 gene:ENSMUSG00000078592	1.23632	10.8705
Atp5l	Mus musculus ATP synthase, H+ transporting, mitochondrial F0 complex, subunit g (Atp5l), nuclear gene encoding mitochondrial protein, mRNA.	1.23559	10.8705
Sgta	Mus musculus small glutamine-rich tetratricopeptide repeat (TPR)-containing, alpha (Sgta), mRNA.	1.22693	10.8705
Gapdh	Mus musculus glyceraldehyde-3-phosphate dehydrogenase (GAPDH) mRNA, complete cds.	1.21962	10.8705
Mif	Mus musculus macrophage migration inhibitory factor (Mif), mRNA.	1.21698	10.8705
Mvd	Mus musculus mevalonate (diphospho) decarboxylase (Mvd), transcript variant 1, mRNA.	1.21064	10.8705
Mrpl28	Mus musculus mitochondrial ribosomal protein L28 (Mrpl28), nuclear gene encoding mitochondrial protein, mRNA.	1.20999	10.8705
---	cdna:pseudogene chromosome:NCBIM37:8:13021941:13022210:1 gene:ENSMUSG00000081951	1.20751	10.8705
Nhp2l1	Mus musculus NHP2 non-histone chromosome protein 2-like 1 (S. cerevisiae) (Nhp2l1), mRNA.	1.2063	10.8705
Nhp2l1	Mus musculus NHP2 non-histone chromosome protein 2-like 1 (S. cerevisiae) (Nhp2l1), mRNA.	1.20161	10.8705
---	ncrna:miRNA chromosome:NCBIM37:2:166480556:166480644:-1 gene:ENSMUSG00000088399	1.1971	10.8705
Ndufa11	Mus musculus NADH dehydrogenase (ubiquinone) 1 alpha subcomplex 11 (Ndufa11), nuclear gene encoding mitochondrial protein, mRNA.	1.19425	10.8705
Vax1	Mus musculus ventral anterior homeobox containing gene 1 (Vax1), mRNA.	1.19366	10.8705
Sppl3	Mus musculus signal peptide peptidase 3 (Sppl3), mRNA.	1.19278	10.8705
Mybphl	Mus musculus myosin binding protein H-like (Mybphl), mRNA.	1.19273	10.8705
G3bp1	Mus musculus Ras-GTPase-activating protein SH3-domain binding protein 1 (G3bp1), mRNA.	1.19118	10.8705
---	ncrna:rRNA chromosome:NCBIM37:4:12739853:12739959:1 gene:ENSMUSG00000065823	1.19108	10.8705
Mid1ip1	Mus musculus Mid1 interacting protein 1 (gastrulation specific G12-like (zebrafish)) (Mid1ip1), transcript variant 1, mRNA.	1.18916	10.8705
Mrps26	Mus musculus mitochondrial ribosomal protein S26 (Mrps26), nuclear gene encoding mitochondrial protein, mRNA.	1.18855	10.8705
Eftud2	Mus musculus elongation factor Tu GTP binding domain containing 2 (Eftud2), transcript variant 1, mRNA.	1.18066	10.8705
Snhg1	Mus musculus 9 days embryo whole body cDNA, RIKEN full-length enriched library, clone:D030060F23 product:Mus musculus U22 snoRNA host gene (UHG) gene, complete sequence, full insert sequence.	1.17955	10.8705
Mfsd7b	Mus musculus major facilitator superfamily domain containing 7B (Mfsd7b), mRNA.	1.17748	10.8705
Tmem229b	Mus musculus transmembrane protein 229B (Tmem229b), transcript variant 1, mRNA.	1.17442	10.8705
---	cdna:Genscan chromosome:NCBIM37:10:83758612:83771894:1	1.1649	10.8705
---	ncrna:snRNA chromosome:NCBIM37:15:73559594:73559720:1 gene:ENSMUSG00000084493	1.16326	10.8705
2510012J08Rik	Mus musculus RIKEN cDNA 2510012J08 gene (2510012J08Rik), mRNA.	1.1585	10.8705
Gm10489	Putative uncharacterized protein gene:ENSMUSG00000073288	1.1482	10.8705
Tinf2	Mus musculus Terf1 (TRF1)-interacting nuclear factor 2 (Tinf2), mRNA.	1.14551	10.8705
Syt1	Mus musculus synaptotagmin I (Syt1), mRNA.	3.69465	11.3304
Slc25a21	Mus musculus solute carrier family 25 (mitochondrial oxodicarboxylate carrier), member 21 (Slc25a21), nuclear gene encoding mitochondrial protein, transcript variant 1, mRNA.	3.03245	11.3304
Fgf14	Mus musculus fibroblast growth factor 14 (Fgf14), transcript variant 2, mRNA.	2.9038	11.3304
Rtn1	Mus musculus reticulon 1 (Rtn1), transcript variant 1, mRNA.	2.88584	11.3304
Mest	Mus musculus mesoderm specific transcript (Mest), mRNA.	2.78894	11.3304
Cdh20	Mus musculus cadherin 20 (Cdh20), mRNA.	2.69418	11.3304
Nnat	Mus musculus neuronatin (Nnat), transcript variant 1, mRNA.	2.65041	11.3304
Pak3	Mus musculus p21 protein (Cdc42/Rac)-activated kinase 3 (Pak3), transcript variant 5, mRNA.	2.60364	11.3304
Bai3	Mus musculus brain-specific angiogenesis inhibitor 3 (Bai3), mRNA.	2.55616	11.3304
Kif1a	Mus musculus kinesin family member 1A (Kif1a), transcript variant 1, mRNA.	2.54879	11.3304
Cdh2	Mus musculus cadherin 2 (Cdh2), mRNA.	2.47096	11.3304
Stmn3	Mus musculus stathmin-like 3 (Stmn3), mRNA.	2.45224	11.3304
Sv2b	Mus musculus synaptic vesicle glycoprotein 2 b (Sv2b), transcript variant 2, mRNA.	2.43015	11.3304
4930555G01Rik	Mus musculus RIKEN cDNA 4930555G01 gene (4930555G01Rik), mRNA.	2.42653	11.3304
4930555G01Rik	Mus musculus RIKEN cDNA 4930555G01 gene (4930555G01Rik), mRNA.	2.42653	11.3304
Nefl	Mus musculus neurofilament, light polypeptide (Nefl), mRNA.	2.40497	11.3304
Insm1	Mus musculus insulinoma-associated 1 (Insm1), mRNA.	2.34921	11.3304
Sema3e	Mus musculus sema domain, immunoglobulin domain (Ig), short basic domain, secreted, (semaphorin) 3E (Sema3e), mRNA.	2.33589	11.3304
Elavl3	Mus musculus ELAV (embryonic lethal, abnormal vision, Drosophila)-like 3 (Hu antigen C) (Elavl3), mRNA.	2.33361	11.3304
Syt14	Mus musculus synaptotagmin XIV (Syt14), mRNA.	2.32398	11.3304
---	Mus musculus 13 days embryo heart cDNA, RIKEN full-length enriched library, clone:D330002D23 product:unclassifiable, full insert sequence.	2.29898	11.3304
Sv2a	Mus musculus synaptic vesicle glycoprotein 2 a (Sv2a), mRNA.	2.2824	11.3304
Kit	Mus musculus kit oncogene (Kit), transcript variant 1, mRNA.	2.271	11.3304
Runx1t1	Mus musculus runt-related transcription factor 1; translocated to, 1 (cyclin D-related) (Runx1t1), transcript variant 1, mRNA.	2.24092	11.3304
Cpa2	Mus musculus carboxypeptidase A2, pancreatic (Cpa2), mRNA.	2.20042	11.3304
Unc80	Mus musculus unc-80 homolog (C. elegans) (Unc80), mRNA.	2.18922	11.3304
Chd7	Mus musculus chromodomain helicase DNA binding protein 7 (Chd7), mRNA.	2.18849	11.3304
Dclk2	Mus musculus doublecortin-like kinase 2 (Dclk2), transcript variant 1, mRNA.	2.1681	11.3304
Gm3002	Mus musculus predicted gene 3002 (Gm3002), non-coding RNA.	2.16707	11.3304
Scn8a	Mus musculus sodium channel, voltage-gated, type VIII, alpha (Scn8a), transcript variant 1, mRNA.	2.15997	11.3304
Cacna1b	Mus musculus calcium channel, voltage-dependent, N type, alpha 1B subunit (Cacna1b), transcript variant 1, mRNA.	2.13928	11.3304
Fat3	Mus musculus FAT tumor suppressor homolog 3 (Drosophila) (Fat3), mRNA.	2.08381	11.3304
Jakmip2	Mus musculus janus kinase and microtubule interacting protein 2 (Jakmip2), mRNA.	2.06767	11.3304
Syp	Mus musculus synaptophysin (Syp), mRNA.	2.06061	11.3304
Chd7	Mus musculus chromodomain helicase DNA binding protein 7 (Chd7), mRNA.	2.04775	11.3304
Aplp1	Mus musculus amyloid beta (A4) precursor-like protein 1 (Aplp1), mRNA.	2.02574	11.3304
Cntnap4	Mus musculus contactin associated protein-like 4 (Cntnap4), mRNA.	2.02273	11.3304
Rundc3b	Mus musculus RUN domain containing 3B (Rundc3b), mRNA.	2.0214	11.3304
Cacna1a	Mus musculus calcium channel, voltage-dependent, P/Q type, alpha 1A subunit (Cacna1a), mRNA.	2.02096	11.3304
Galnt9	Mus musculus UDP-N-acetyl-alpha-D-galactosamine:polypeptide N-acetylgalactosaminyltransferase 9 (Galnt9), transcript variant A, mRNA.	2.01323	11.3304
Chd7	Mus musculus chromodomain helicase DNA binding protein 7 (Chd7), mRNA.	2.00263	11.3304
Nol4	Mus musculus nucleolar protein 4 (Nol4), transcript variant 1, mRNA.	1.98779	11.3304
Hmgcll1	Mus musculus 3-hydroxymethyl-3-methylglutaryl-Coenzyme A lyase-like 1 (Hmgcll1), mRNA.	1.9865	11.3304
2011-09-05	Mus musculus septin 5 (Sept5), mRNA.	1.96462	11.3304
Bves	Mus musculus blood vessel epicardial substance (Bves), mRNA.	1.94394	11.3304
Snca	Mus musculus synuclein, alpha (Snca), transcript variant 1, mRNA.	1.94051	11.3304
Disp2	Mus musculus dispatched homolog 2 (Drosophila) (Disp2), mRNA.	1.91816	11.3304
Klf12	Mus musculus Kruppel-like factor 12 (Klf12), mRNA.	1.90949	11.3304
Coro2b	Mus musculus coronin, actin binding protein, 2B (Coro2b), mRNA.	1.90359	11.3304
Car4	Mus musculus carbonic anhydrase 4 (Car4), mRNA.	1.88552	11.3304
---	cdna:pseudogene chromosome:NCBIM37:4:39842241:39843195:-1 gene:ENSMUSG00000084220	1.86832	11.3304
Cyp7b1	Mus musculus cytochrome P450, family 7, subfamily b, polypeptide 1 (Cyp7b1), mRNA.	1.86132	11.3304
Rtn2	Mus musculus reticulon 2 (Z-band associated protein) (Rtn2), transcript variant B, mRNA.	1.85197	11.3304
Fat3	Mus musculus FAT tumor suppressor homolog 3 (Drosophila) (Fat3), mRNA.	1.84333	11.3304
Cadm3	Mus musculus cell adhesion molecule 3 (Cadm3), mRNA.	1.82945	11.3304
Cox8b	Mus musculus cytochrome c oxidase, subunit VIIIb (Cox8b), nuclear gene encoding mitochondrial protein, mRNA.	1.80002	11.3304
Ncapg	Mus musculus non-SMC condensin I complex, subunit G (Ncapg), mRNA.	1.76799	11.3304
Ttk	Mus musculus Ttk protein kinase (Ttk), transcript variant 1, mRNA.	1.76056	11.3304
Kif15	Mus musculus kinesin family member 15 (Kif15), mRNA.	1.72706	11.3304
Actc1	Mus musculus actin, alpha, cardiac muscle 1 (Actc1), mRNA.	1.71514	11.3304
Chd7	Mus musculus chromodomain helicase DNA binding protein 7 (Chd7), mRNA.	1.70577	11.3304
Zfp382	Mus musculus zinc finger protein 382 (Zfp382), mRNA.	1.70203	11.3304
Faim2	Mus musculus Fas apoptotic inhibitory molecule 2 (Faim2), transcript variant 1, mRNA.	1.69862	11.3304
Podxl2	Mus musculus podocalyxin-like 2 (Podxl2), mRNA.	1.69106	11.3304
Tmsb10	Mus musculus thymosin, beta 10 (Tmsb10), mRNA.	1.67168	11.3304
Rbm24	Mus musculus RNA binding motif protein 24 (Rbm24), mRNA.	1.66253	11.3304
Nxph1	Putative uncharacterized protein gene:ENSMUSG00000073272	1.64333	11.3304
Syngr1	Mus musculus synaptogyrin 1 (Syngr1), transcript variant 1a, mRNA.	1.63738	11.3304
Agt	Mus musculus angiotensinogen (serpin peptidase inhibitor, clade A, member 8) (Agt), mRNA.	1.63564	11.3304
Ppil5	Mus musculus peptidylprolyl isomerase (cyclophilin) like 5 (Ppil5), mRNA.	1.63471	11.3304
Bex4	Mus musculus brain expressed gene 4 (Bex4), mRNA.	1.63056	11.3304
Gm98	Mus musculus predicted gene 98 (Gm98), mRNA.	1.62059	11.3304
Mphosph9	Mus musculus M-phase phosphoprotein 9 (Mphosph9), mRNA.	1.61594	11.3304
Gabrq	Mus musculus gamma-aminobutyric acid (GABA) A receptor, subunit theta (Gabrq), mRNA.	1.60252	11.3304
Arhgap33	Mus musculus Rho GTPase activating protein 33 (Arhgap33), mRNA.	1.59176	11.3304
Fads1	Mus musculus fatty acid desaturase 1 (Fads1), mRNA.	1.58744	11.3304
Lphn1	Mus musculus latrophilin 1 (Lphn1), mRNA.	1.58425	11.3304
Nubp1	Mus musculus nucleotide binding protein 1 (Nubp1), mRNA.	1.56467	11.3304
Zfp580	Mus musculus zinc finger protein 580 (Zfp580), mRNA.	1.55358	11.3304
Slc16a3	Mus musculus solute carrier family 16 (monocarboxylic acid transporters), member 3 (Slc16a3), mRNA.	1.54818	11.3304
Magee1	Mus musculus melanoma antigen, family E, 1 (Magee1), mRNA.	1.54784	11.3304
Ttc39c	Mus musculus tetratricopeptide repeat domain 39C (Ttc39c), mRNA.	1.53992	11.3304
Wscd1	Mus musculus WSC domain containing 1 (Wscd1), mRNA.	1.52498	11.3304
Tdp1	Mus musculus tyrosyl-DNA phosphodiesterase 1 (Tdp1), mRNA.	1.52257	11.3304
Pcdhb10	Mus musculus protocadherin beta 10 (Pcdhb10), mRNA.	1.52159	11.3304
Tubgcp3	Mus musculus tubulin, gamma complex associated protein 3 (Tubgcp3), mRNA.	1.50162	11.3304
Mad2l1	Mus musculus MAD2 mitotic arrest deficient-like 1 (yeast) (Mad2l1), mRNA.	1.49419	11.3304
Uck2	Uck2 protein (Fragment) gene:ENSMUSG00000053664	1.48984	11.3304
Bard1	Mus musculus BRCA1 associated RING domain 1 (Bard1), mRNA.	1.48867	11.3304
Spire2	Mus musculus spire homolog 2 (Drosophila) (Spire2), mRNA.	1.48141	11.3304
---	cdna:pseudogene chromosome:NCBIM37:2:12004239:12005630:-1 gene:ENSMUSG00000080801	1.48121	11.3304
Cenpl	Mus musculus centromere protein L (Cenpl), transcript variant 2, mRNA.	1.47544	11.3304
X99384	Mus musculus cDNA sequence X99384 (X99384), mRNA.	1.47087	11.3304
Trip13	Mus musculus thyroid hormone receptor interactor 13 (Trip13), mRNA.	1.4677	11.3304
Kcnt1	Mus musculus potassium channel, subfamily T, member 1 (Kcnt1), transcript variant 1, mRNA.	1.46454	11.3304
Socs2	Mus musculus suppressor of cytokine signaling 2 (Socs2), transcript variant 1, mRNA.	1.4608	11.3304
Slc1a4	Mus musculus solute carrier family 1 (glutamate/neutral amino acid transporter), member 4 (Slc1a4), mRNA.	1.45228	11.3304
Siah1b	Mus musculus seven in absentia 1B (Siah1b), mRNA.	1.45218	11.3304
Syt12	Mus musculus synaptotagmin XII (Syt12), mRNA.	1.44608	11.3304
Haus8	Mus musculus 4HAUS augmin-like complex, subunit 8 (Haus8), transcript variant 1, mRNA.	1.44061	11.3304
Slc30a10	Mus musculus solute carrier family 30, member 10 (Slc30a10), mRNA.	1.43558	11.3304
Dmc1	Mus musculus DMC1 dosage suppressor of mck1 homolog, meiosis-specific homologous recombination (yeast) (Dmc1), mRNA.	1.43347	11.3304
Umps	Mus musculus uridine monophosphate synthetase (Umps), mRNA.	1.4275	11.3304
---	ncrna:rRNA chromosome:NCBIM37:8:126064393:126064511:-1 gene:ENSMUSG00000075962	1.42325	11.3304
---	ncrna:rRNA chromosome:NCBIM37:8:126064393:126064511:-1 gene:ENSMUSG00000075962	1.42325	11.3304
---	ncrna:rRNA chromosome:NCBIM37:8:126064393:126064511:-1 gene:ENSMUSG00000075962	1.42325	11.3304
---	ncrna:rRNA chromosome:NCBIM37:8:126064393:126064511:-1 gene:ENSMUSG00000075962	1.42325	11.3304
---	ncrna:rRNA chromosome:NCBIM37:8:126064393:126064511:-1 gene:ENSMUSG00000075962	1.42325	11.3304
---	ncrna:rRNA chromosome:NCBIM37:8:126064393:126064511:-1 gene:ENSMUSG00000075962	1.42325	11.3304
---	ncrna:snoRNA chromosome:NCBIM37:3:88497853:88497979:1 gene:ENSMUSG00000088604	1.42051	11.3304
H2afy2	Mus musculus H2A histone family, member Y2 (H2afy2), mRNA.	1.40663	11.3304
Gins3	Mus musculus GINS complex subunit 3 (Psf3 homolog) (Gins3), mRNA.	1.40383	11.3304
Hmgn2	Mus musculus high mobility group nucleosomal binding domain 2, mRNA (cDNA clone MGC:103384 IMAGE:6516041), complete cds.	1.40282	11.3304
Dgkd	Mus musculus diacylglycerol kinase, delta (Dgkd), mRNA.	1.39876	11.3304
Cenpt	Mus musculus centromere protein T (Cenpt), mRNA.	1.3876	11.3304
Mir23b	Mus musculus microRNA 23b (Mir23b), microRNA.	1.38576	11.3304
Paqr9	Mus musculus progestin and adipoQ receptor family member IX (Paqr9), mRNA.	1.38556	11.3304
Ncapd3	Mus musculus non-SMC condensin II complex, subunit D3 (Ncapd3), mRNA.	1.37453	11.3304
Rapgef1	Mus musculus Rap guanine nucleotide exchange factor (GEF) 1 (Rapgef1), transcript variant 1, mRNA.	1.37182	11.3304
Lrig1	Mus musculus leucine-rich repeats and immunoglobulin-like domains 1 (Lrig1), mRNA.	1.37029	11.3304
Dhcr7	Mus musculus 7-dehydrocholesterol reductase (Dhcr7), mRNA.	1.36931	11.3304
Chaf1a	Mus musculus chromatin assembly factor 1, subunit A (p150) (Chaf1a), mRNA.	1.36683	11.3304
Grk6	Mus musculus G protein-coupled receptor kinase 6 (Grk6), transcript variant 1, mRNA.	1.35863	11.3304
Nup205	Mus musculus nucleoporin 205 (Nup205), mRNA.	1.35392	11.3304
Ak1	Mus musculus adenylate kinase 1 (Ak1), mRNA.	1.34601	11.3304
Fads3	Mus musculus fatty acid desaturase 3 (Fads3), mRNA.	1.34261	11.3304
Pom121	Mus musculus nuclear pore membrane protein 121 (Pom121), mRNA.	1.33757	11.3304
Ppp2r5b	Mus musculus protein phosphatase 2, regulatory subunit B (B56), beta isoform (Ppp2r5b), mRNA.	1.33528	11.3304
9430015G10Rik	Mus musculus RIKEN cDNA 9430015G10 gene (9430015G10Rik), transcript variant 1, mRNA.	1.33137	11.3304
6330545A04Rik	Mus musculus RIKEN cDNA 6330545A04 gene (6330545A04Rik), mRNA.	1.32172	11.3304
Ap2a1	Mus musculus adaptor protein complex AP-2, alpha 1 subunit (Ap2a1), transcript variant 1, mRNA.	1.31404	11.3304
Il17b	Mus musculus interleukin 17B (Il17b), mRNA.	1.3108	11.3304
Me2	Mus musculus malic enzyme 2, NAD(+)-dependent, mitochondrial (Me2), nuclear gene encoding mitochondrial protein, mRNA.	1.30542	11.3304
Snord49a	Mus musculus small nucleolar RNA, C/D box 49A (Snord49a), small nucleolar RNA.	1.30456	11.3304
Aacs	Mus musculus acetoacetyl-CoA synthetase (Aacs), mRNA.	1.30001	11.3304
E130303B06Rik	Mus musculus RIKEN cDNA E130303B06 gene, mRNA (cDNA clone MGC:62932 IMAGE:1245862), complete cds.	1.2958	11.3304
H3f3a	Mus musculus H3 histone, family 3A (H3f3a), mRNA.	1.29475	11.3304
Shisa7	Mus musculus shisa homolog 7 (Xenopus laevis) (Shisa7), mRNA.	1.29448	11.3304
Pgs1	Mus musculus phosphatidylglycerophosphate synthase 1 (Pgs1), mRNA.	1.29435	11.3304
H3f3a	Mus musculus H3 histone, family 3A (H3f3a), mRNA.	1.28981	11.3304
Pfas	Mus musculus phosphoribosylformylglycinamidine synthase (FGAR amidotransferase) (Pfas), mRNA.	1.28858	11.3304
Ppp2r5d	Mus musculus protein phosphatase 2, regulatory subunit B (B56), delta isoform (Ppp2r5d), mRNA.	1.28793	11.3304
Tcf3	Mus musculus transcription factor 3 (Tcf3), transcript variant 1, mRNA.	1.28503	11.3304
Pkm2	Mus musculus pyruvate kinase, muscle (Pkm2), mRNA.	1.28327	11.3304
Pvrl1	Mus musculus poliovirus receptor-related 1 (Pvrl1), mRNA.	1.27959	11.3304
Hmga1	Mus musculus high mobility group AT-hook 1 (Hmga1), transcript variant 1, mRNA.	1.27625	11.3304
---	cdna:known chromosome:NCBIM37:12:22146995:22382205:-1 gene:ENSMUSG00000073169	1.27157	11.3304
Elk1	Mus musculus ELK1, member of ETS oncogene family (Elk1), mRNA.	1.26573	11.3304
Dnajc9	Mus musculus DnaJ (Hsp40) homolog, subfamily C, member 9 (Dnajc9), mRNA.	1.2621	11.3304
Traf4	Mus musculus TNF receptor associated factor 4 (Traf4), mRNA.	1.25953	11.3304
Smarcb1	Mus musculus SWI/SNF related, matrix associated, actin dependent regulator of chromatin, subfamily b, member 1 (Smarcb1), transcript variant 1, mRNA.	1.25633	11.3304
H3f3a	Mus musculus H3 histone, family 3A (H3f3a), mRNA.	1.25578	11.3304
Tcf19	Mus musculus transcription factor 19 (Tcf19), transcript variant 1, mRNA.	1.25357	11.3304
Mrto4	Mus musculus MRT4, mRNA turnover 4, homolog (S. cerevisiae) (Mrto4), mRNA.	1.25124	11.3304
Rcan3	Mus musculus regulator of calcineurin 3 (Rcan3), mRNA.	1.24662	11.3304
Fmnl3	Mus musculus formin-like 3 (Fmnl3), mRNA.	1.24612	11.3304
Nrm	Mus musculus nurim (nuclear envelope membrane protein) (Nrm), mRNA.	1.24609	11.3304
Gcn1l1	Mus musculus GCN1 general control of amino-acid synthesis 1-like 1 (yeast) (Gcn1l1), mRNA.	1.24588	11.3304
Gm10482	Putative uncharacterized protein gene:ENSMUSG00000073226	1.24524	11.3304
Tdg	Mus musculus thymine DNA glycosylase (Tdg), transcript variant 1, mRNA.	1.24345	11.3304
Pafah1b3	Mus musculus platelet-activating factor acetylhydrolase, isoform 1b, subunit 3 (Pafah1b3), mRNA.	1.23962	11.3304
Snrpf	Mus musculus small nuclear ribonucleoprotein polypeptide F (Snrpf), mRNA.	1.23707	11.3304
Gm6981	Mus musculus predicted pseudogene 6981 (Gm6981), non-coding RNA.	1.23645	11.3304
Xrcc1	Mus musculus X-ray repair complementing defective repair in Chinese hamster cells 1 (Xrcc1), mRNA.	1.23435	11.3304
Lrfn4	Mus musculus leucine rich repeat and fibronectin type III domain containing 4 (Lrfn4), mRNA.	1.23273	11.3304
Tmem198	Mus musculus transmembrane protein 198 (Tmem198), mRNA.	1.23157	11.3304
Wsb2	Mus musculus WD repeat and SOCS box-containing 2 (Wsb2), mRNA.	1.23023	11.3304
Banf1	Mus musculus barrier to autointegration factor 1 (Banf1), transcript variant 2, mRNA.	1.22943	11.3304
Mutyh	Mus musculus mutY homolog (E. coli) (Mutyh), nuclear gene encoding mitochondrial protein, transcript variant 2, mRNA.	1.22849	11.3304
---	cdna:known chromosome:NCBIM37:3:142625525:142626756:1 gene:ENSMUSG00000078162	1.22782	11.3304
C530005A16Rik	Mus musculus RIKEN cDNA C530005A16 gene (C530005A16Rik), non-coding RNA.	1.22084	11.3304
Gapdh	Mus musculus glyceraldehyde-3-phosphate dehydrogenase, mRNA (cDNA clone MGC:102543 IMAGE:5068049), complete cds.	1.22056	11.3304
Ndufa4l2	Mus musculus NADH dehydrogenase (ubiquinone) 1 alpha subcomplex, 4-like 2 (Ndufa4l2), mRNA.	1.21826	11.3304
Strn4	Mus musculus striatin, calmodulin binding protein 4 (Strn4), transcript variant 1, mRNA.	1.21691	11.3304
Ung	Mus musculus uracil DNA glycosylase (Ung), transcript variant 1, mRNA.	1.21668	11.3304
Ccdc101	Mus musculus coiled-coil domain containing 101 (Ccdc101), mRNA.	1.21656	11.3304
Tubgcp6	Mus musculus tubulin, gamma complex associated protein 6 (Tubgcp6), mRNA.	1.21389	11.3304
Tab1	Mus musculus TGF-beta activated kinase 1/MAP3K7 binding protein 1 (Tab1), mRNA.	1.21305	11.3304
Spsb3	Mus musculus splA/ryanodine receptor domain and SOCS box containing 3 (Spsb3), transcript variant 1, mRNA.	1.20935	11.3304
Tdg	Mus musculus thymine DNA glycosylase (Tdg), transcript variant 2, mRNA.	1.2072	11.3304
6430598A04Rik	Mus musculus RIKEN cDNA 6430598A04 gene (6430598A04Rik), mRNA.	1.20322	11.3304
St8sia5	Mus musculus ST8 alpha-N-acetyl-neuraminide alpha-2,8-sialyltransferase 5 (St8sia5), transcript variant 1, mRNA.	1.20216	11.3304
Atp6v1g1	Mus musculus ATPase, H+ transporting, lysosomal V1 subunit G1 (Atp6v1g1), mRNA.	1.20133	11.3304
---	Mus musculus 16 days embryo head cDNA, RIKEN full-length enriched library, clone:C130077F17 product:hypothetical protein, full insert sequence.	1.20114	11.3304
Anapc11	Mus musculus anaphase promoting complex subunit 11 (Anapc11), transcript variant 1, mRNA.	1.20105	11.3304
Uqcr11	Mus musculus ubiquinol-cytochrome c reductase, complex III subunit XI (Uqcr11), nuclear gene encoding mitochondrial protein, mRNA.	1.19558	11.3304
Kifc5c-ps // Kifc5c-ps // Kifc5c-ps // Kifc5c-ps	Mus musculus kinesin-related protein KIFC5C mRNA, partial cds.	1.19544	11.3304
Mtap7d1	Mus musculus microtubule-associated protein 7 domain containing 1 (Mtap7d1), transcript variant 1, mRNA.	1.19279	11.3304
Camkk2	Mus musculus calcium/calmodulin-dependent protein kinase kinase 2, beta (Camkk2), mRNA.	1.18758	11.3304
Gm10683	Putative uncharacterized protein gene:ENSMUSG00000074383	1.18684	11.3304
Gins2	Mus musculus GINS complex subunit 2 (Psf2 homolog) (Gins2), mRNA.	1.18567	11.3304
---	ncrna:misc_RNA chromosome:NCBIM37:8:3803069:3803358:-1 gene:ENSMUSG00000088025	1.18432	11.3304
Tpm4	Mus musculus tropomyosin 4 (Tpm4), mRNA.	1.18096	11.3304
2310003H01Rik	Mus musculus RIKEN cDNA 2310003H01 gene (2310003H01Rik), mRNA.	1.17936	11.3304
Zmym3	Mus musculus zinc finger, MYM-type 3 (Zmym3), transcript variant 2, mRNA.	1.17835	11.3304
Psmg3	Mus musculus proteasome (prosome, macropain) assembly chaperone 3 (Psmg3), mRNA.	1.17522	11.3304
Nfix	Isoform NFIX1 of Nuclear factor 1 X-type gene:ENSMUSG00000001911	1.17444	11.3304
Rad9	Mus musculus RAD9 homolog (S. pombe) (Rad9), mRNA.	1.1744	11.3304
Rtn4r	Mus musculus reticulon 4 receptor (Rtn4r), mRNA.	1.16773	11.3304
Tomm40	Mus musculus translocase of outer mitochondrial membrane 40 homolog (yeast) (Tomm40), nuclear gene encoding mitochondrial protein, transcript variant 1, mRNA.	1.16611	11.3304
Pop7	Mus musculus processing of precursor 7, ribonuclease P family, (S. cerevisiae) (Pop7), mRNA.	1.16495	11.3304
Ssna1	Mus musculus Sjogren's syndrome nuclear autoantigen 1 (Ssna1), mRNA.	1.16048	11.3304
---	cdna:Genscan chromosome:NCBIM37:18:13285028:13290070:-1	1.15881	11.3304
Cdkn2b	Mus musculus cyclin-dependent kinase inhibitor 2B (p15, inhibits CDK4) (Cdkn2b), mRNA.	1.15809	11.3304
Ccdc74a	Mus musculus coiled-coil domain containing 74A (Ccdc74a), mRNA.	1.15373	11.3304
2010107E04Rik	Mus musculus RIKEN cDNA 2010107E04 gene (2010107E04Rik), mRNA.	1.1482	11.3304
Wbp2nl	Mus musculus WBP2 N-terminal like (Wbp2nl), mRNA.	1.14734	11.3304
Slc35e4	Mus musculus solute carrier family 35, member E4 (Slc35e4), mRNA.	1.14515	11.3304
2810410L24Rik	Mus musculus RIKEN cDNA 2810410L24 gene (2810410L24Rik), non-coding RNA.	1.14335	11.3304
Hmgn1	Mus musculus high mobility group nucleosomal binding domain 1 (Hmgn1), mRNA.	1.13306	11.3304
Mlst8	Mus musculus MTOR associated protein, LST8 homolog (S. cerevisiae) (Mlst8), mRNA.	1.12392	11.3304
Elavl4	Mus musculus ELAV (embryonic lethal, abnormal vision, Drosophila)-like 4 (Hu antigen D) (Elavl4), transcript variant 1, mRNA.	2.97765	11.5714
Sox11	Mus musculus SRY-box containing gene 11 (Sox11), mRNA.	2.7696	11.5714
Scn3a	Mus musculus sodium channel, voltage-gated, type III, alpha (Scn3a), mRNA.	2.65879	11.5714
Gm2897	Mus musculus predicted gene 2897 (Gm2897), transcript variant 1, mRNA.	2.47119	11.5714
Gm2897	Mus musculus predicted gene 2897 (Gm2897), transcript variant 1, mRNA.	2.47119	11.5714
Ascl1	Mus musculus achaete-scute complex homolog 1 (Drosophila) (Ascl1), mRNA.	2.45951	11.5714
Gm10406	Mus musculus predicted gene 10406 (Gm10406), mRNA.	2.42163	11.5714
Dner	Mus musculus delta/notch-like EGF-related receptor (Dner), mRNA.	2.3671	11.5714
Chd7	Mus musculus chromodomain helicase DNA binding protein 7 (Chd7), mRNA.	2.36628	11.5714
Gm3002	Mus musculus predicted gene 3002 (Gm3002), non-coding RNA.	2.36362	11.5714
Gm1973	Mus musculus predicted gene 1973 (Gm1973), mRNA.	2.33056	11.5714
Gm5567	Mus musculus predicted gene 5567 (Gm5567), mRNA.	2.30577	11.5714
Tcerg1l	Mus musculus transcription elongation regulator 1-like (Tcerg1l), mRNA.	2.29912	11.5714
Gm3002	Mus musculus predicted gene 3002 (Gm3002), non-coding RNA.	2.27002	11.5714
Gm3002	Mus musculus predicted gene 3002 (Gm3002), non-coding RNA.	2.24793	11.5714
Fat3	Mus musculus FAT tumor suppressor homolog 3 (Drosophila) (Fat3), mRNA.	2.23782	11.5714
Peg3	Mus musculus paternally expressed 3 (Peg3), mRNA.	2.23723	11.5714
---	Mus musculus 13 days embryo heart cDNA, RIKEN full-length enriched library, clone:D330002D23 product:unclassifiable, full insert sequence.	2.22767	11.5714
Anks1b	Mus musculus ankyrin repeat and sterile alpha motif domain containing 1B (Anks1b), transcript variant 1, mRNA.	2.22383	11.5714
Unc79	Mus musculus unc-79 homolog (C. elegans) (Unc79), mRNA.	2.2153	11.5714
Celf4	Mus musculus CUGBP, Elav-like family member 4 (Celf4), transcript variant 1, mRNA.	2.14444	11.5714
Fat3	Mus musculus FAT tumor suppressor homolog 3 (Drosophila) (Fat3), mRNA.	2.14303	11.5714
Marcksl1	Mus musculus MARCKS-like 1 (Marcksl1), mRNA.	2.12262	11.5714
Chd7	Mus musculus chromodomain helicase DNA binding protein 7 (Chd7), mRNA.	2.10612	11.5714
Camta1	Mus musculus calmodulin binding transcription activator 1 (Camta1), transcript variant 1, mRNA.	2.08743	11.5714
St18	Mus musculus suppression of tumorigenicity 18 (St18), mRNA.	2.07486	11.5714
Fat3	Mus musculus FAT tumor suppressor homolog 3 (Drosophila) (Fat3), mRNA.	2.0516	11.5714
Tll1	Mus musculus tolloid-like (Tll1), mRNA.	2.02104	11.5714
Snap91	Mus musculus synaptosomal-associated protein 91 (Snap91), mRNA.	1.99145	11.5714
Rapgef4	Mus musculus Rap guanine nucleotide exchange factor (GEF) 4 (Rapgef4), mRNA.	1.98744	11.5714
Pcdhb6	Mus musculus protocadherin beta 6 (Pcdhb6), mRNA.	1.97771	11.5714
Brsk1	Mus musculus BR serine/threonine kinase 1 (Brsk1), transcript variant 1, mRNA.	1.9597	11.5714
Rimbp2	Mus musculus RIMS binding protein 2 (Rimbp2), mRNA.	1.92374	11.5714
Rtkn2	Mus musculus rhotekin 2 (Rtkn2), mRNA.	1.92071	11.5714
Elovl4	Mus musculus elongation of very long chain fatty acids (FEN1/Elo2, SUR4/Elo3, yeast)-like 4 (Elovl4), transcript variant 1, mRNA.	1.89931	11.5714
Tnr	Mus musculus tenascin R (Tnr), mRNA.	1.83852	11.5714
Plekhh2	Mus musculus pleckstrin homology domain containing, family H (with MyTH4 domain) member 2 (Plekhh2), mRNA.	1.83177	11.5714
Nfasc	Mus musculus neurofascin (Nfasc), transcript variant 1, mRNA.	1.80593	11.5714
Casc5	Mus musculus cancer susceptibility candidate 5 (Casc5), mRNA.	1.79616	11.5714
Gnao1	Mus musculus guanine nucleotide binding protein, alpha O (Gnao1), transcript variant A, mRNA.	1.77848	11.5714
Lrrc8c	Mus musculus leucine rich repeat containing 8 family, member C (Lrrc8c), mRNA.	1.76472	11.5714
Mapk8ip2	Mus musculus mitogen-activated protein kinase 8 interacting protein 2 (Mapk8ip2), mRNA.	1.75846	11.5714
Anp32e	Mus musculus acidic (leucine-rich) nuclear phosphoprotein 32 family, member E (Anp32e), mRNA.	1.74996	11.5714
Plk4	Mus musculus polo-like kinase 4 (Drosophila) (Plk4), mRNA.	1.74935	11.5714
C530008M17Rik	Mus musculus RIKEN cDNA C530008M17 gene (C530008M17Rik), mRNA.	1.731	11.5714
Susd4	Mus musculus sushi domain containing 4 (Susd4), mRNA.	1.73069	11.5714
Gabrb1	Mus musculus gamma-aminobutyric acid (GABA) A receptor, subunit beta 1 (Gabrb1), mRNA.	1.72968	11.5714
Kcnb2	Mus musculus potassium voltage gated channel, Shab-related subfamily, member 2 (Kcnb2), mRNA.	1.72353	11.5714
Tdrkh	Mus musculus tudor and KH domain containing protein (Tdrkh), mRNA.	1.72138	11.5714
Polq	Mus musculus polymerase (DNA directed), theta (Polq), transcript variant 1, mRNA.	1.6964	11.5714
Dsn1	Mus musculus DSN1, MIND kinetochore complex component, homolog (S. cerevisiae) (Dsn1), mRNA.	1.68773	11.5714
Btbd11	Mus musculus BTB (POZ) domain containing 11 (Btbd11), transcript variant 1, mRNA.	1.6855	11.5714
Stxbp1	Mus musculus syntaxin binding protein 1 (Stxbp1), transcript variant 1, mRNA.	1.67772	11.5714
Dync1i1	Mus musculus dynein cytoplasmic 1 intermediate chain 1 (Dync1i1), transcript variant 2, mRNA.	1.66404	11.5714
Rcor2	Mus musculus REST corepressor 2 (Rcor2), mRNA.	1.66253	11.5714
Mtap6	Mus musculus microtubule-associated protein 6 (Mtap6), transcript variant 1, mRNA.	1.63082	11.5714
Sdk1	Mus musculus sidekick homolog 1 (chicken) (Sdk1), mRNA.	1.61935	11.5714
Tmsb10	Mus musculus thymosin, beta 10 (Tmsb10), mRNA.	1.61853	11.5714
Ddx25	Mus musculus DEAD (Asp-Glu-Ala-Asp) box polypeptide 25 (Ddx25), mRNA.	1.61134	11.5714
B4galnt4	Mus musculus beta-1,4-N-acetyl-galactosaminyl transferase 4 (B4galnt4), mRNA.	1.60588	11.5714
BC068157	Mus musculus cDNA sequence BC068157 (BC068157), mRNA.	1.59477	11.5714
2610021K21Rik	Mus musculus RIKEN cDNA 2610021K21 gene (2610021K21Rik), mRNA.	1.58873	11.5714
Bai2	Mus musculus brain-specific angiogenesis inhibitor 2 (Bai2), mRNA.	1.57916	11.5714
Vstm2a	Mus musculus V-set and transmembrane domain containing 2A (Vstm2a), mRNA.	1.57484	11.5714
Mgat5b	Mus musculus mannoside acetylglucosaminyltransferase 5, isoenzyme B (Mgat5b), mRNA.	1.57129	11.5714
Hjurp	Mus musculus Holliday junction recognition protein (Hjurp), mRNA.	1.56862	11.5714
Fam57b	Mus musculus family with sequence similarity 57, member B (Fam57b), transcript variant 2, mRNA.	1.55778	11.5714
Xrcc2	Mus musculus X-ray repair complementing defective repair in Chinese hamster cells 2 (Xrcc2), mRNA.	1.5513	11.5714
4930422G04Rik	Mus musculus RIKEN cDNA 4930422G04 gene (4930422G04Rik), mRNA.	1.53916	11.5714
Cdc45	Mus musculus cell division cycle 45 homolog (S. cerevisiae) (Cdc45), transcript variant 1, mRNA.	1.53902	11.5714
4930534B04Rik	Mus musculus RIKEN cDNA 4930534B04 gene (4930534B04Rik), mRNA.	1.53804	11.5714
Pcdhb15	Mus musculus protocadherin beta 15 (Pcdhb15), mRNA.	1.52393	11.5714
Idh3a	Mus musculus isocitrate dehydrogenase 3 (NAD+) alpha (Idh3a), nuclear gene encoding mitochondrial protein, mRNA.	1.5125	11.5714
4922501L14Rik	Mus musculus cDNA sequence BC007180, mRNA (cDNA clone MGC:169860 IMAGE:8861255), complete cds.	1.51009	11.5714
Socs2	Mus musculus suppressor of cytokine signaling 2 (Socs2), transcript variant 1, mRNA.	1.50257	11.5714
Rasd2	Mus musculus RASD family, member 2 (Rasd2), mRNA.	1.50189	11.5714
Limk1	Mus musculus LIM-domain containing, protein kinase (Limk1), mRNA.	1.50183	11.5714
Grip1	Mus musculus glutamate receptor interacting protein 1 (Grip1), transcript variant 1, mRNA.	1.49935	11.5714
Whsc1	Mus musculus Wolf-Hirschhorn syndrome candidate 1 (human) (Whsc1), transcript variant 1, mRNA.	1.49917	11.5714
2011-09-11	Mus musculus septin 11 (Sept11), mRNA.	1.4981	11.5714
Gck	Mus musculus glucokinase (Gck), mRNA.	1.49318	11.5714
Parvb	Mus musculus parvin, beta (Parvb), mRNA.	1.49225	11.5714
Kcnk10	Mus musculus potassium channel, subfamily K, member 10 (Kcnk10), mRNA.	1.48376	11.5714
Slc4a8	Mus musculus solute carrier family 4 (anion exchanger), member 8 (Slc4a8), mRNA.	1.481	11.5714
Napepld	Mus musculus N-acyl phosphatidylethanolamine phospholipase D (Napepld), mRNA.	1.47944	11.5714
Lrrc24	Mus musculus leucine rich repeat containing 24 (Lrrc24), mRNA.	1.47766	11.5714
Ercc6l	Mus musculus excision repair cross-complementing rodent repair deficiency complementation group 6 - like (Ercc6l), mRNA.	1.46746	11.5714
Ypel1	Mus musculus yippee-like 1 (Drosophila) (Ypel1), mRNA.	1.46495	11.5714
Prmt2	Mus musculus protein arginine N-methyltransferase 2 (Prmt2), transcript variant 1, mRNA.	1.46343	11.5714
Phc1	Mus musculus polyhomeotic-like 1 (Drosophila) (Phc1), transcript variant 1, mRNA.	1.46174	11.5714
Hmgb3	Mus musculus high mobility group box 3 (Hmgb3), mRNA.	1.45647	11.5714
Rims3	Mus musculus regulating synaptic membrane exocytosis 3 (Rims3), mRNA.	1.4532	11.5714
Chst11	Mus musculus carbohydrate sulfotransferase 11 (Chst11), mRNA.	1.44837	11.5714
Clip4	Mus musculus CAP-GLY domain containing linker protein family, member 4 (Clip4), transcript variant 1, mRNA.	1.44362	11.5714
Papd7	Mus musculus PAP associated domain containing 7 (Papd7), transcript variant 1, mRNA.	1.43094	11.5714
Suv39h1	Mus musculus suppressor of variegation 3-9 homolog 1 (Drosophila) (Suv39h1), mRNA.	1.42522	11.5714
Mfng	Mus musculus MFNG O-fucosylpeptide 3-beta-N-acetylglucosaminyltransferase (Mfng), mRNA.	1.42271	11.5714
Bub3	Mus musculus budding uninhibited by benzimidazoles 3 homolog (S. cerevisiae) (Bub3), mRNA.	1.41038	11.5714
Tmem177	Mus musculus transmembrane protein 177 (Tmem177), mRNA.	1.40971	11.5714
Onecut2	Mus musculus one cut domain, family member 2 (Onecut2), mRNA.	1.40324	11.5714
BC018242	Mus musculus cDNA sequence BC018242 (BC018242), mRNA.	1.40248	11.5714
Ilf2	Mus musculus interleukin enhancer binding factor 2 (Ilf2), mRNA.	1.39787	11.5714
Nup133	Mus musculus nucleoporin 133 (Nup133), mRNA.	1.39453	11.5714
Hcn3	Mus musculus hyperpolarization-activated, cyclic nucleotide-gated K+ 3 (Hcn3), mRNA.	1.37922	11.5714
Tnfsf9	Mus musculus tumor necrosis factor (ligand) superfamily, member 9 (Tnfsf9), mRNA.	1.37861	11.5714
Mir708	Mus musculus microRNA 708 (Mir708), microRNA.	1.37844	11.5714
Tmem132a	Mus musculus transmembrane protein 132A (Tmem132a), mRNA.	1.37698	11.5714
Fbxl2	Mus musculus F-box and leucine-rich repeat protein 2 (Fbxl2), mRNA.	1.3687	11.5714
Unc13a	Mus musculus unc-13 homolog A (C. elegans) (Unc13a), mRNA.	1.3614	11.5714
Kcnq3	Mus musculus potassium voltage-gated channel, subfamily Q, member 3 (Kcnq3), mRNA.	1.36104	11.5714
Thnsl1	Mus musculus threonine synthase-like 1 (bacterial) (Thnsl1), transcript variant 1, mRNA.	1.35452	11.5714
Cdc6	Mus musculus cell division cycle 6 homolog (S. cerevisiae) (Cdc6), transcript variant 1, mRNA.	1.35379	11.5714
Zfhx2	Mus musculus zinc finger homeobox 2 (Zfhx2), mRNA.	1.34698	11.5714
B9d2	Mus musculus B9 protein domain 2 (B9d2), mRNA.	1.34496	11.5714
Snrpa1	Mus musculus small nuclear ribonucleoprotein polypeptide A' (Snrpa1), mRNA.	1.34148	11.5714
Tmem22	Mus musculus transmembrane protein 22 (Tmem22), mRNA.	1.33896	11.5714
2410018L13Rik	Mus musculus RIKEN cDNA 2410018L13 gene, mRNA (cDNA clone IMAGE:6837407).	1.33252	11.5714
Slc12a5	Mus musculus solute carrier family 12, member 5 (Slc12a5), mRNA.	1.3251	11.5714
Cux2	Mus musculus cut-like homeobox 2 (Cux2), mRNA.	1.3217	11.5714
---	ncrna:snoRNA chromosome:NCBIM37:17:35088958:35089020:-1 gene:ENSMUSG00000064662	1.3199	11.5714
Gm9861	Putative uncharacterized protein (Fragment) gene:ENSMUSG00000051848	1.3166	11.5714
Recql4	Mus musculus RecQ protein-like 4 (Recql4), mRNA.	1.31257	11.5714
Igsf8	Mus musculus immunoglobulin superfamily, member 8 (Igsf8), mRNA.	1.31038	11.5714
---	cdna:known chromosome:NCBIM37:12:22146995:22382205:-1 gene:ENSMUSG00000073169	1.30923	11.5714
Ephx2	Mus musculus epoxide hydrolase 2, cytoplasmic (Ephx2), mRNA.	1.30772	11.5714
Vrk1	Mus musculus vaccinia related kinase 1 (Vrk1), transcript variant 1, mRNA.	1.3065	11.5714
---	cdna:Genscan chromosome:NCBIM37:1:108336177:108356584:1	1.30645	11.5714
Ubash3b	Mus musculus ubiquitin associated and SH3 domain containing, B (Ubash3b), mRNA.	1.30473	11.5714
Lsm2	Mus musculus LSM2 homolog, U6 small nuclear RNA associated (S. cerevisiae) (Lsm2), transcript variant 1, mRNA.	1.29706	11.5714
F730047E07Rik	Mus musculus RIKEN cDNA F730047E07 gene (F730047E07Rik), mRNA.	1.29509	11.5714
Nfkbil2	Mus musculus nuclear factor of kappa light polypeptide gene enhancer in B-cells inhibitor-like 2 (Nfkbil2), mRNA.	1.29464	11.5714
Obfc2b	Mus musculus oligonucleotide/oligosaccharide-binding fold containing 2B (Obfc2b), mRNA.	1.29107	11.5714
---	cdna:Genscan chromosome:NCBIM37:3:105893921:105934935:1	1.28888	11.5714
Cyp51	Mus musculus cytochrome P450, family 51 (Cyp51), mRNA.	1.28689	11.5714
Cyth2	Mus musculus cytohesin 2 (Cyth2), transcript variant 1, mRNA.	1.28534	11.5714
Atp6v0c	Mus musculus ATPase, H+ transporting, lysosomal V0 subunit C (Atp6v0c), mRNA.	1.28491	11.5714
Kctd13	Mus musculus potassium channel tetramerisation domain containing 13 (Kctd13), mRNA.	1.2843	11.5714
Ppp1r14b	Mus musculus protein phosphatase 1, regulatory (inhibitor) subunit 14B (Ppp1r14b), mRNA.	1.28422	11.5714
Git1	Mus musculus G protein-coupled receptor kinase-interactor 1 (Git1), mRNA.	1.28419	11.5714
H3f3a	Mus musculus H3 histone, family 3A (H3f3a), mRNA.	1.2814	11.5714
Prim2	Mus musculus DNA primase, p58 subunit (Prim2), mRNA.	1.27815	11.5714
Gm5464	Mus musculus predicted gene 5464 (Gm5464), mRNA.	1.27681	11.5714
Atp6v0c	Mus musculus ATPase, H+ transporting, lysosomal V0 subunit C (Atp6v0c), mRNA.	1.27578	11.5714
AU040829	Mus musculus expressed sequence AU040829 (AU040829), transcript variant 2, mRNA.	1.2754	11.5714
L3mbtl2	Mus musculus l(3)mbt-like 2 (Drosophila) (L3mbtl2), mRNA.	1.27409	11.5714
Ralgds	Mus musculus ral guanine nucleotide dissociation stimulator (Ralgds), transcript variant 1, mRNA.	1.27249	11.5714
---	cdna:pseudogene chromosome:NCBIM37:4:135553438:135553802:1 gene:ENSMUSG00000083852	1.26967	11.5714
Celf6	Mus musculus CUGBP, Elav-like family member 6 (Celf6), mRNA.	1.26952	11.5714
Zfp428	Mus musculus zinc finger protein 428 (Zfp428), mRNA.	1.26774	11.5714
Rqcd1	Mus musculus rcd1 (required for cell differentiation) homolog 1 (S. pombe) (Rqcd1), mRNA.	1.2677	11.5714
Abcb10	Mus musculus ATP-binding cassette, sub-family B (MDR/TAP), member 10 (Abcb10), nuclear gene encoding mitochondrial protein, mRNA.	1.26731	11.5714
Sae1	Mus musculus SUMO1 activating enzyme subunit 1 (Sae1), mRNA.	1.26629	11.5714
Pdap1	Mus musculus PDGFA associated protein 1 (Pdap1), mRNA.	1.26625	11.5714
---	cdna:Genscan chromosome:NCBIM37:5:11192523:11193470:1	1.26235	11.5714
5730408K05Rik	Mus musculus RIKEN cDNA 5730408K05 gene (5730408K05Rik), non-coding RNA.	1.26223	11.5714
Spata24	Mus musculus spermatogenesis associated 24 (Spata24), transcript variant 1, mRNA.	1.26039	11.5714
---	cdna:pseudogene chromosome:NCBIM37:X:159282770:159283455:1 gene:ENSMUSG00000084022	1.25913	11.5714
Mbd3	Mus musculus methyl-CpG binding domain protein 3 (Mbd3), mRNA.	1.25765	11.5714
Mical1	Mus musculus microtubule associated monoxygenase, calponin and LIM domain containing 1 (Mical1), transcript variant 1, mRNA.	1.25648	11.5714
Olfr1347	Mus musculus olfactory receptor 1347 (Olfr1347), mRNA.	1.2556	11.5714
Nol4	Mus musculus nucleolar protein 4 (Nol4), transcript variant 2, mRNA.	1.2534	11.5714
Phox2a	Mus musculus paired-like homeobox 2a (Phox2a), mRNA.	1.25201	11.5714
---	ncrna:snoRNA chromosome:NCBIM37:9:120038469:120038671:1 gene:ENSMUSG00000064380	1.24944	11.5714
Gm6625	PREDICTED: Mus musculus predicted gene 6625 (Gm6625), mRNA.	1.24695	11.5714
Olfm2	Mus musculus olfactomedin 2 (Olfm2), mRNA.	1.24642	11.5714
Agap3	Mus musculus ArfGAP with GTPase domain, ankyrin repeat and PH domain 3 (Agap3), mRNA.	1.24327	11.5714
---	ncrna:snRNA chromosome:NCBIM37:9:90246833:90247009:1 gene:ENSMUSG00000065881	1.24294	11.5714
Sf3b3	Mus musculus splicing factor 3b, subunit 3 (Sf3b3), mRNA.	1.2405	11.5714
---	ncrna:snRNA chromosome:NCBIM37:18:13368211:13368317:-1 gene:ENSMUSG00000065150	1.24036	11.5714
Cdkl2	Mus musculus cyclin-dependent kinase-like 2 (CDC2-related kinase) (Cdkl2), transcript variant 1, mRNA.	1.2399	11.5714
Bax	Mus musculus BCL2-associated X protein (Bax), mRNA.	1.23791	11.5714
Opa3	Mus musculus optic atrophy 3 (human) (Opa3), nuclear gene encoding mitochondrial protein, mRNA.	1.23072	11.5714
Unk	Mus musculus unkempt homolog (Drosophila) (Unk), mRNA.	1.22954	11.5714
Psmc4	Mus musculus proteasome (prosome, macropain) 26S subunit, ATPase, 4 (Psmc4), mRNA.	1.22639	11.5714
Szt2	Mus musculus seizure threshold 2 (Szt2), mRNA.	1.21895	11.5714
Hras1	Mus musculus Harvey rat sarcoma virus oncogene 1 (Hras1), transcript variant 2, mRNA.	1.21814	11.5714
Tdg	Mus musculus thymine DNA glycosylase (Tdg), transcript variant 2, mRNA.	1.21355	11.5714
---	cdna:pseudogene chromosome:NCBIM37:X:109415805:109416076:1 gene:ENSMUSG00000082669	1.20444	11.5714
Crtc1	Mus musculus CREB regulated transcription coactivator 1 (Crtc1), mRNA.	1.20405	11.5714
Gm996	Mus musculus predicted gene 996 (Gm996), mRNA.	1.20402	11.5714
Gm12070	Mus musculus predicted gene 12070 (Gm12070), non-coding RNA.	1.20278	11.5714
Gapdh	Mus musculus glyceraldehyde-3-phosphate dehydrogenase (Gapdh), mRNA.	1.20224	11.5714
Snord49b	Mus musculus small nucleolar RNA, C/D box 49B (Snord49b), small nucleolar RNA.	1.20198	11.5714
9130401M01Rik	Mus musculus RIKEN cDNA 9130401M01 gene, mRNA (cDNA clone MGC:61313 IMAGE:5714794), complete cds.	1.20077	11.5714
Trim28	Mus musculus tripartite motif-containing 28 (Trim28), mRNA.	1.19955	11.5714
Akt1	Mus musculus thymoma viral proto-oncogene 1 (Akt1), transcript variant 1, mRNA.	1.19933	11.5714
Atp6v1g1	Mus musculus ATPase, H+ transporting, lysosomal V1 subunit G1 (Atp6v1g1), mRNA.	1.19765	11.5714
Fbl	Mus musculus fibrillarin (Fbl), mRNA.	1.19499	11.5714
Ctdp1	Mus musculus CTD (carboxy-terminal domain, RNA polymerase II, polypeptide A) phosphatase, subunit 1 (Ctdp1), mRNA.	1.19337	11.5714
Gm10482 // Gm10482 // Gm10482 // Gm10482	Putative uncharacterized protein gene:ENSMUSG00000073226	1.19184	11.5714
---	cdna:Genscan chromosome:NCBIM37:5:22230393:22232993:-1	1.18751	11.5714
2011-09-10	Mus musculus septin 10 (Sept10), transcript variant 2, mRNA.	1.18479	11.5714
Gm11529	Mus musculus predicted gene 11529 (Gm11529), non-coding RNA.	1.18038	11.5714
Ruvbl2	Mus musculus RuvB-like protein 2 (Ruvbl2), mRNA.	1.17924	11.5714
Szt2	Mus musculus seizure threshold 2 (Szt2), mRNA.	1.17878	11.5714
Traf3ip1	Mus musculus TRAF3 interacting protein 1 (Traf3ip1), mRNA.	1.17723	11.5714
Batf3	Mus musculus basic leucine zipper transcription factor, ATF-like 3 (Batf3), mRNA.	1.17712	11.5714
Bcdin3d	Mus musculus BCDIN3 domain containing (Bcdin3d), mRNA.	1.17666	11.5714
Cnnm2	Mus musculus cyclin M2 (Cnnm2), transcript variant 1, mRNA.	1.1755	11.5714
Adprh	Mus musculus ADP-ribosylarginine hydrolase (Adprh), mRNA.	1.17364	11.5714
---	cdna:pseudogene chromosome:NCBIM37:11:45642821:45643371:1 gene:ENSMUSG00000081251	1.1726	11.5714
Rnaseh2a	Mus musculus ribonuclease H2, large subunit (Rnaseh2a), mRNA.	1.17143	11.5714
Capn10	Mus musculus calpain 10 (Capn10), mRNA.	1.17083	11.5714
Cox5a	Mus musculus cytochrome c oxidase, subunit Va (Cox5a), nuclear gene encoding mitochondrial protein, mRNA.	1.17061	11.5714
Eif1ad	Mus musculus eukaryotic translation initiation factor 1A domain containing (Eif1ad), mRNA.	1.16956	11.5714
Gm12472	Putative uncharacterized protein gene:ENSMUSG00000078359	1.16583	11.5714
Drap1	Mus musculus Dr1 associated protein 1 (negative cofactor 2 alpha) (Drap1), mRNA.	1.16568	11.5714
---	cdna:Genscan chromosome:NCBIM37:10:116409824:116410180:-1	1.16441	11.5714
---	ncrna:rRNA chromosome:NCBIM37:X:148212214:148212332:1 gene:ENSMUSG00000070219	1.1614	11.5714
Mrps16	Mus musculus mitochondrial ribosomal protein S16 (Mrps16), nuclear gene encoding mitochondrial protein, mRNA.	1.16029	11.5714
Snapc2	Mus musculus small nuclear RNA activating complex, polypeptide 2 (Snapc2), mRNA.	1.15783	11.5714
Tssc1	Mus musculus tumor suppressing subtransferable candidate 1 (Tssc1), mRNA.	1.15619	11.5714
Aco2	Mus musculus aconitase 2, mitochondrial (Aco2), nuclear gene encoding mitochondrial protein, mRNA.	1.15292	11.5714
---	cdna:Genscan chromosome:NCBIM37:12:19050548:19105074:1	1.14448	11.5714
---	cdna:Genscan chromosome:NCBIM37:12:22238196:22324120:-1	1.14448	11.5714
---	cdna:Genscan chromosome:NCBIM37:12:23786534:23819320:-1	1.14448	11.5714
Gm4425 // Gm4425 // Gm4425 // Gm4425 // Gm4425 // Gm4425 // Gm4425 // Gm4425	Uncharacterized protein gene:ENSMUSG00000078374	1.14448	11.5714
Gm5436	Uncharacterized protein gene:ENSMUSG00000042962	1.14427	11.5714
Ppp1r3e	Mus musculus protein phosphatase 1, regulatory (inhibitor) subunit 3E (Ppp1r3e), mRNA.	1.14111	11.5714
Ltv1	Mus musculus LTV1 homolog (S. cerevisiae) (Ltv1), mRNA.	1.14107	11.5714
Ppp2r2c	Mus musculus protein phosphatase 2 (formerly 2A), regulatory subunit B (PR 52), gamma isoform (Ppp2r2c), mRNA.	2.66981	13.4275
Gm3002	Mus musculus predicted gene 3002 (Gm3002), non-coding RNA.	2.5268	13.4275
Scn3a	sodium channel, voltage-gated, type III, alpha gene:ENSMUSG00000057182	2.47308	13.4275
Fat3	Mus musculus FAT tumor suppressor homolog 3 (Drosophila) (Fat3), mRNA.	2.45726	13.4275
Gm3696	Mus musculus predicted gene 3696 (Gm3696), mRNA.	2.4407	13.4275
Gm3002	Mus musculus predicted gene 3002 (Gm3002), non-coding RNA.	2.40839	13.4275
Chd7	Mus musculus chromodomain helicase DNA binding protein 7 (Chd7), mRNA.	2.39984	13.4275
Gm3002	Mus musculus predicted gene 3002 (Gm3002), non-coding RNA.	2.38582	13.4275
Gm3002	Mus musculus predicted gene 3002 (Gm3002), non-coding RNA.	2.37105	13.4275
Gm3002	Mus musculus predicted gene 3002 (Gm3002), non-coding RNA.	2.35238	13.4275
Thbs4	Mus musculus thrombospondin 4 (Thbs4), mRNA.	2.33539	13.4275
Gm10406	Mus musculus predicted gene 10406 (Gm10406), mRNA.	2.31663	13.4275
Gm3002	Mus musculus predicted gene 3002 (Gm3002), non-coding RNA.	2.30856	13.4275
Dpysl2	Mus musculus dihydropyrimidinase-like 2 (Dpysl2), mRNA.	2.28091	13.4275
Fat3	Mus musculus FAT tumor suppressor homolog 3 (Drosophila) (Fat3), mRNA.	2.21272	13.4275
Cacna2d1	Mus musculus calcium channel, voltage-dependent, alpha2/delta subunit 1 (Cacna2d1), transcript variant a, mRNA.	2.20138	13.4275
6330407J23Rik	Mus musculus RIKEN cDNA 6330407J23 gene (6330407J23Rik), mRNA.	2.19503	13.4275
Gdap1	Mus musculus ganglioside-induced differentiation-associated-protein 1 (Gdap1), mRNA.	2.13478	13.4275
1700086L19Rik	Mus musculus RIKEN cDNA 1700086L19 gene (1700086L19Rik), transcript variant 1, non-coding RNA.	2.1326	13.4275
Kif5c	Mus musculus kinesin family member 5C (Kif5c), mRNA.	2.12055	13.4275
Efna5	Mus musculus ephrin A5 (Efna5), transcript variant 1, mRNA.	2.10283	13.4275
Gm3002	Mus musculus predicted gene 3002 (Gm3002), non-coding RNA.	2.04025	13.4275
Cacna2d1	Mus musculus calcium channel, voltage-dependent, alpha2/delta subunit 1 (Cacna2d1), transcript variant a, mRNA.	2.02942	13.4275
Pcdhb16	Mus musculus protocadherin beta 16 (Pcdhb16), mRNA.	2.02665	13.4275
Ogdhl	Mus musculus oxoglutarate dehydrogenase-like (Ogdhl), nuclear gene encoding mitochondrial protein, mRNA.	2.01517	13.4275
Chgb	Mus musculus chromogranin B (Chgb), mRNA.	2.00227	13.4275
Gprasp2	Mus musculus G protein-coupled receptor associated sorting protein 2 (Gprasp2), transcript variant 1, mRNA.	1.99149	13.4275
ENSMUSG00000068790	Mus musculus predicted gene, ENSMUSG00000068790 (ENSMUSG00000068790), mRNA.	1.98345	13.4275
Iqsec3	Mus musculus IQ motif and Sec7 domain 3 (Iqsec3), mRNA.	1.95019	13.4275
Cacna1d	Mus musculus calcium channel, voltage-dependent, L type, alpha 1D subunit (Cacna1d), transcript variant 1, mRNA.	1.8852	13.4275
Kcnh8	Mus musculus potassium voltage-gated channel, subfamily H (eag-related), member 8 (Kcnh8), mRNA.	1.88154	13.4275
Pcdhb17	Mus musculus protocadherin beta 17 (Pcdhb17), mRNA.	1.8599	13.4275
C79407	Mus musculus expressed sequence C79407 (C79407), mRNA.	1.84699	13.4275
Pcdhb18	Mus musculus protocadherin beta 18 (Pcdhb18), mRNA.	1.84586	13.4275
6230409E13Rik	Mus musculus RIKEN cDNA 6230409E13 gene (6230409E13Rik), mRNA.	1.82712	13.4275
Ephb2	Mus musculus Eph receptor B2 (Ephb2), mRNA.	1.82292	13.4275
Mex3a	mex3 homolog A gene:ENSMUSG00000074480	1.81483	13.4275
Mns1	Mus musculus meiosis-specific nuclear structural protein 1 (Mns1), mRNA.	1.81259	13.4275
Lrrc16b	Mus musculus leucine rich repeat containing 16B (Lrrc16b), mRNA.	1.79074	13.4275
Bub1	Mus musculus budding uninhibited by benzimidazoles 1 homolog (S. cerevisiae) (Bub1), transcript variant 1, mRNA.	1.77747	13.4275
Epha7	Mus musculus Eph receptor A7 (Epha7), transcript variant 1, mRNA.	1.77095	13.4275
Unc80	Mus musculus unc-80 homolog (C. elegans) (Unc80), mRNA.	1.74923	13.4275
Bard1	Mus musculus BRCA1 associated RING domain 1 (Bard1), mRNA.	1.74829	13.4275
Cenpw	Mus musculus centromere protein W (Cenpw), mRNA.	1.7336	13.4275
Kcnh5	Mus musculus potassium voltage-gated channel, subfamily H (eag-related), member 5 (Kcnh5), mRNA.	1.72019	13.4275
Zcchc18	Mus musculus zinc finger, CCHC domain containing 18 (Zcchc18), transcript variant 1, mRNA.	1.70202	13.4275
Mtap7d2	Mus musculus MAP7 domain containing 2 (Mtap7d2), mRNA.	1.69976	13.4275
Hey1	Mus musculus hairy/enhancer-of-split related with YRPW motif 1 (Hey1), mRNA.	1.69882	13.4275
Pcsk2	Mus musculus proprotein convertase subtilisin/kexin type 2 (Pcsk2), mRNA.	1.69267	13.4275
Actl6b	Mus musculus actin-like 6B (Actl6b), mRNA.	1.68519	13.4275
Gen1	Mus musculus Gen homolog 1, endonuclease (Drosophila) (Gen1), mRNA.	1.67878	13.4275
Arhgef2	Mus musculus rho/rac guanine nucleotide exchange factor (GEF) 2 (Arhgef2), mRNA.	1.67281	13.4275
Fat3	Mus musculus FAT tumor suppressor homolog 3 (Drosophila) (Fat3), mRNA.	1.6648	13.4275
Ptprs	Mus musculus protein tyrosine phosphatase, receptor type, S (Ptprs), mRNA.	1.64767	13.4275
Sarm1	Mus musculus sterile alpha and HEAT/Armadillo motif containing 1 (Sarm1), transcript variant 1, mRNA.	1.64306	13.4275
Pcdhb5	Mus musculus protocadherin beta 5 (Pcdhb5), mRNA.	1.63983	13.4275
Shd	Mus musculus src homology 2 domain-containing transforming protein D (Shd), transcript variant 1, mRNA.	1.63685	13.4275
Myb	Mus musculus myeloblastosis oncogene (Myb), mRNA.	1.62854	13.4275
Fgf12	Mus musculus fibroblast growth factor 12 (Fgf12), transcript variant 1, mRNA.	1.59899	13.4275
Mmp12	Mus musculus matrix metallopeptidase 12 (Mmp12), mRNA.	1.59685	13.4275
Ncoa7	Mus musculus nuclear receptor coactivator 7 (Ncoa7), transcript variant 1, mRNA.	1.57927	13.4275
Blm	Mus musculus Bloom syndrome, RecQ helicase-like (Blm), transcript variant 1, mRNA.	1.56816	13.4275
Apbb1	Mus musculus amyloid beta (A4) precursor protein-binding, family B, member 1 (Apbb1), mRNA.	1.56741	13.4275
Lhfpl4	Mus musculus lipoma HMGIC fusion partner-like protein 4 (Lhfpl4), mRNA.	1.56619	13.4275
Syce2	Mus musculus synaptonemal complex central element protein 2 (Syce2), transcript variant 1, mRNA.	1.56531	13.4275
Dbpht2	Mus musculus DNA binding protein with his-thr domain (Dbpht2), mRNA.	1.56307	13.4275
Pcdhb19	Mus musculus protocadherin beta 19 (Pcdhb19), mRNA.	1.56112	13.4275
D3Bwg0562e	Mus musculus DNA segment, Chr 3, Brigham & Women's Genetics 0562 expressed (D3Bwg0562e), mRNA.	1.55221	13.4275
Epha5	Mus musculus Eph receptor A5 (Epha5), mRNA.	1.55158	13.4275
Trdn	Mus musculus triadin (Trdn), mRNA.	1.55035	13.4275
Khdrbs3	Mus musculus KH domain containing, RNA binding, signal transduction associated 3 (Khdrbs3), mRNA.	1.54719	13.4275
Cpt1c	Mus musculus carnitine palmitoyltransferase 1c (Cpt1c), mRNA.	1.53595	13.4275
Sox6	Mus musculus SRY-box containing gene 6 (Sox6), transcript variant 1, mRNA.	1.53473	13.4275
Lpcat1	Mus musculus lysophosphatidylcholine acyltransferase 1 (Lpcat1), mRNA.	1.52371	13.4275
Ptp4a3	Mus musculus protein tyrosine phosphatase 4a3 (Ptp4a3), transcript variant 2, mRNA.	1.52339	13.4275
Mapk8ip1	Mus musculus mitogen-activated protein kinase 8 interacting protein 1 (Mapk8ip1), mRNA.	1.51208	13.4275
Cap2	Mus musculus CAP, adenylate cyclase-associated protein, 2 (yeast) (Cap2), mRNA.	1.50877	13.4275
Efr3b	Mus musculus EFR3 homolog B (S. cerevisiae) (Efr3b), mRNA.	1.5062	13.4275
Lrp3	Mus musculus low density lipoprotein receptor-related protein 3 (Lrp3), mRNA.	1.5053	13.4275
Armc2	Mus musculus armadillo repeat containing 2 (Armc2), mRNA.	1.50291	13.4275
Pbx3	Mus musculus pre B-cell leukemia transcription factor 3 (Pbx3), mRNA.	1.50183	13.4275
Snora73b	Mus musculus small nucleolar RNA, H/ACA box 73b (Snora73b), small nucleolar RNA.	1.49292	13.4275
Rnf208	Mus musculus ring finger protein 208 (Rnf208), mRNA.	1.49222	13.4275
Dbf4	Mus musculus DBF4 homolog (S. cerevisiae) (Dbf4), transcript variant 1, mRNA.	1.49109	13.4275
Fbxo48	Mus musculus F-box protein 48 (Fbxo48), mRNA.	1.48913	13.4275
Sez6	Mus musculus seizure related gene 6 (Sez6), mRNA.	1.48351	13.4275
Tcp11l1	Mus musculus t-complex 11 like 1 (Tcp11l1), mRNA.	1.48343	13.4275
Lin7a	Mus musculus lin-7 homolog A (C. elegans) (Lin7a), transcript variant 1, mRNA.	1.47715	13.4275
Katnal2	Mus musculus katanin p60 subunit A-like 2 (Katnal2), mRNA.	1.47528	13.4275
---	cdna:Genscan chromosome:NCBIM37:18:7493341:7549524:1	1.47095	13.4275
6720463M24Rik	Mus musculus RIKEN cDNA 6720463M24 gene (6720463M24Rik), mRNA.	1.4647	13.4275
Unc5a	Mus musculus unc-5 homolog A (C. elegans) (Unc5a), mRNA.	1.46224	13.4275
Ttbk1	Mus musculus tau tubulin kinase 1 (Ttbk1), mRNA.	1.45675	13.4275
Mapk4	Mus musculus mitogen-activated protein kinase 4 (Mapk4), mRNA.	1.45275	13.4275
Zbed3	Mus musculus zinc finger, BED domain containing 3 (Zbed3), mRNA.	1.4471	13.4275
Sipa1l2	Mus musculus signal-induced proliferation-associated 1 like 2 (Sipa1l2), mRNA.	1.43951	13.4275
Nlgn2	Mus musculus neuroligin 2 (Nlgn2), mRNA.	1.43297	13.4275
Pnmal1	Mus musculus PNMA-like 1 (Pnmal1), mRNA.	1.43081	13.4275
Mtss1l	Mus musculus metastasis suppressor 1-like (Mtss1l), mRNA.	1.42796	13.4275
Trim35	Mus musculus tripartite motif-containing 35 (Trim35), mRNA.	1.42506	13.4275
Kifc5b	Mus musculus kinesin family member C5B (Kifc5b), mRNA.	1.42114	13.4275
Zwilch	Mus musculus Zwilch, kinetochore associated, homolog (Drosophila) (Zwilch), mRNA.	1.41653	13.4275
Csnk1e	Mus musculus casein kinase 1, epsilon (Csnk1e), mRNA.	1.41564	13.4275
Tlx3	Mus musculus T-cell leukemia, homeobox 3 (Tlx3), mRNA.	1.41338	13.4275
Srsf13b	Mus musculus serine/arginine-rich splicing factor 13B (Srsf13b), mRNA.	1.40625	13.4275
Def8	Mus musculus differentially expressed in FDCP 8 (Def8), mRNA.	1.40433	13.4275
Gpc1	Mus musculus glypican 1 (Gpc1), mRNA.	1.40391	13.4275
Anln	Mus musculus anillin, actin binding protein (Anln), mRNA.	1.39701	13.4275
Rcc1	Mus musculus regulator of chromosome condensation 1 (Rcc1), transcript variant 1, mRNA.	1.38475	13.4275
Ywhag	Mus musculus tyrosine 3-monooxygenase/tryptophan 5-monooxygenase activation protein, gamma polypeptide (Ywhag), mRNA.	1.37822	13.4275
Rtel1	Mus musculus regulator of telomere elongation helicase 1 (Rtel1), transcript variant 1, mRNA.	1.36804	13.4275
Zfp41	Mus musculus zinc finger protein 41 (Zfp41), transcript variant 1, mRNA.	1.36183	13.4275
Tiam1	Mus musculus T-cell lymphoma invasion and metastasis 1 (Tiam1), transcript variant 1, mRNA.	1.35597	13.4275
Lmnb2	Mus musculus lamin B2 (Lmnb2), mRNA.	1.35045	13.4275
Epdr1	Mus musculus ependymin related protein 1 (zebrafish) (Epdr1), mRNA.	1.34118	13.4275
Zfp184	Mus musculus zinc finger protein 184 (Kruppel-like) (Zfp184), mRNA.	1.33977	13.4275
Lrrtm1	Mus musculus leucine rich repeat transmembrane neuronal 1 (Lrrtm1), mRNA.	1.33937	13.4275
Bend4	Mus musculus BEN domain containing 4 (Bend4), mRNA.	1.33711	13.4275
Gfra4	Mus musculus glial cell line derived neurotrophic factor family receptor alpha 4 (Gfra4), transcript variant 2, mRNA.	1.33631	13.4275
Prim1	Mus musculus DNA primase, p49 subunit (Prim1), mRNA.	1.33292	13.4275
Ipo9	Mus musculus importin 9 (Ipo9), mRNA.	1.33087	13.4275
Rgs20	Mus musculus regulator of G-protein signaling 20 (Rgs20), transcript variant 1, mRNA.	1.33077	13.4275
Cmya5	Mus musculus cardiomyopathy associated 5 (Cmya5), mRNA.	1.3244	13.4275
Nup210l	Mus musculus nucleoporin 210-like (Nup210l), mRNA.	1.32331	13.4275
Obsl1	Mus musculus obscurin-like 1 (Obsl1), mRNA.	1.32273	13.4275
Traip	Mus musculus TRAF-interacting protein (Traip), mRNA.	1.31723	13.4275
---	gi|34538597|ref|NC_005089.1|:c5086-5018, tRNA-Ala	1.31518	13.4275
4831426I19Rik	Mus musculus RIKEN cDNA 4831426I19 gene (4831426I19Rik), transcript variant 1, mRNA.	1.3145	13.4275
Maz	Mus musculus MYC-associated zinc finger protein (purine-binding transcription factor) (Maz), mRNA.	1.31211	13.4275
Nudc	Mus musculus nuclear distribution gene C homolog (Aspergillus) (Nudc), mRNA.	1.31193	13.4275
Eif1b	Mus musculus eukaryotic translation initiation factor 1B (Eif1b), mRNA.	1.30954	13.4275
Skp2	Mus musculus S-phase kinase-associated protein 2 (p45) (Skp2), transcript variant 2, mRNA.	1.30833	13.4275
Rasgef1a	Mus musculus RasGEF domain family, member 1A (Rasgef1a), mRNA.	1.30569	13.4275
Gm4983	Mus musculus predicted gene, EG245297, mRNA (cDNA clone MGC:40732 IMAGE:5362444), complete cds.	1.30329	13.4275
Trio	Mus musculus triple functional domain (PTPRF interacting) (Trio), mRNA.	1.29931	13.4275
Pmm1	Mus musculus phosphomannomutase 1 (Pmm1), mRNA.	1.29926	13.4275
Lrrc49	Mus musculus leucine rich repeat containing 49 (Lrrc49), transcript variant 2, mRNA.	1.29447	13.4275
Cox7a1	Mus musculus cytochrome c oxidase, subunit VIIa 1 (Cox7a1), nuclear gene encoding mitochondrial protein, mRNA.	1.29276	13.4275
Mllt1	Mus musculus myeloid/lymphoid or mixed-lineage leukemia (trithorax homolog, Drosophila); translocated to, 1 (Mllt1), mRNA.	1.2912	13.4275
Afap1l2	Mus musculus actin filament associated protein 1-like 2 (Afap1l2), transcript variant 3, mRNA.	1.28612	13.4275
---	Uncharacterized protein gene:ENSMUSG00000079167	1.27918	13.4275
Slmo2	Mus musculus slowmo homolog 2 (Drosophila) (Slmo2), mRNA.	1.27705	13.4275
Ppp1r14b	Mus musculus protein phosphatase 1, regulatory (inhibitor) subunit 14B (Ppp1r14b), mRNA.	1.27059	13.4275
Atp6v0c	Mus musculus ATPase, H+ transporting, lysosomal V0 subunit C (Atp6v0c), mRNA.	1.26864	13.4275
Trdn	Mus musculus triadin (Trdn), mRNA.	1.26845	13.4275
Tigd3	Mus musculus tigger transposable element derived 3 (Tigd3), mRNA.	1.26316	13.4275
---	cdna:novel chromosome:NCBIM37:10:39731672:39732679:1 gene:ENSMUSG00000075241	1.26173	13.4275
Ift57	Mus musculus intraflagellar transport 57 homolog (Chlamydomonas) (Ift57), mRNA.	1.26145	13.4275
Nup210l	Mus musculus nucleoporin 210-like (Nup210l), mRNA.	1.26035	13.4275
Srrt	Mus musculus serrate RNA effector molecule homolog (Arabidopsis) (Srrt), transcript variant 1, mRNA.	1.25895	13.4275
---	cdna:Genscan chromosome:NCBIM37:5:11255905:11266326:1	1.25844	13.4275
Aldh5a1	Mus musculus aldhehyde dehydrogenase family 5, subfamily A1 (Aldh5a1), mRNA.	1.25815	13.4275
LOC100043371	Mus musculus RIKEN cDNA 6030426L16 gene, mRNA (cDNA clone MGC:117729 IMAGE:30937101), complete cds.	1.2526	13.4275
Zmiz2	Mus musculus zinc finger, MIZ-type containing 2 (Zmiz2), transcript variant 1, mRNA.	1.2524	13.4275
Kat2a	Mus musculus K(lysine) acetyltransferase 2A (Kat2a), transcript variant 1, mRNA.	1.25082	13.4275
Thoc6	Mus musculus THO complex 6 homolog (Drosophila) (Thoc6), mRNA.	1.24957	13.4275
Ccdc21	Mus musculus coiled-coil domain containing 21 (Ccdc21), mRNA.	1.24956	13.4275
---	cdna:known chromosome:NCBIM37:2:130102036:130103306:1 gene:ENSMUSG00000027405	1.24944	13.4275
Gemin4	Mus musculus gem (nuclear organelle) associated protein 4 (Gemin4), mRNA.	1.24828	13.4275
Snrpd2	Mus musculus small nuclear ribonucleoprotein D2 (Snrpd2), mRNA.	1.24097	13.4275
Zfp704	Mus musculus zinc finger protein 704 (Zfp704), mRNA.	1.24016	13.4275
Klhl8	Mus musculus kelch-like 8 (Drosophila) (Klhl8), mRNA.	1.23599	13.4275
Agap1	Mus musculus ArfGAP with GTPase domain, ankyrin repeat and PH domain 1 (Agap1), transcript variant 1, mRNA.	1.23496	13.4275
Med18	Mus musculus mediator of RNA polymerase II transcription, subunit 18 homolog (yeast) (Med18), mRNA.	1.23307	13.4275
Opn3	Mus musculus opsin 3 (Opn3), mRNA.	1.23152	13.4275
Nes	Mus musculus nestin (Nes), mRNA.	1.23129	13.4275
---	cdna:pseudogene chromosome:NCBIM37:2:38345624:38345758:1 gene:ENSMUSG00000084124	1.23024	13.4275
---	ncrna:snoRNA chromosome:NCBIM37:2:26766781:26766854:1 gene:ENSMUSG00000065258	1.22932	13.4275
Zfyve28	Mus musculus zinc finger, FYVE domain containing 28 (Zfyve28), mRNA.	1.22834	13.4275
---	cdna:Genscan chromosome:NCBIM37:5:11255905:11266326:1	1.22687	13.4275
Haus5	Mus musculus HAUS augmin-like complex, subunit 5 (Haus5), mRNA.	1.22651	13.4275
Nsmce4a	Mus musculus non-SMC element 4 homolog A (S. cerevisiae) (Nsmce4a), mRNA.	1.22575	13.4275
Usp30	Mus musculus ubiquitin specific peptidase 30 (Usp30), mRNA.	1.22216	13.4275
Acd	Mus musculus adrenocortical dysplasia (Acd), mRNA.	1.221	13.4275
Ift140	Mus musculus intraflagellar transport 140 homolog (Chlamydomonas) (Ift140), mRNA.	1.22011	13.4275
Sepw1	Mus musculus selenoprotein W, muscle 1 (Sepw1), mRNA.	1.21974	13.4275
Egln3	Mus musculus EGL nine homolog 3 (C. elegans) (Egln3), mRNA.	1.2171	13.4275
Snora21	Mus musculus small nucleolar RNA, H/ACA box 21 (Snora21), small nucleolar RNA.	1.21422	13.4275
Th1l	Mus musculus TH1-like homolog (Drosophila) (Th1l), mRNA.	1.21381	13.4275
---	ncrna:snoRNA chromosome:NCBIM37:6:97497432:97497561:-1 gene:ENSMUSG00000064724	1.20975	13.4275
Apln	Mus musculus apelin (Apln), mRNA.	1.20888	13.4275
Gm10291	Glyceraldehyde-3-phosphate dehydrogenase gene:ENSMUSG00000070443	1.20627	13.4275
Zswim4	Mus musculus zinc finger, SWIM domain containing 4 (Zswim4), mRNA.	1.2026	13.4275
Raf1	Mus musculus v-raf-leukemia viral oncogene 1 (Raf1), mRNA.	1.2024	13.4275
Cd276	Mus musculus CD276 antigen (Cd276), mRNA.	1.20177	13.4275
Gapdh	Mus musculus glyceraldehyde-3-phosphate dehydrogenase (Gapdh), mRNA.	1.19512	13.4275
Pih1d1	Mus musculus PIH1 domain containing 1 (Pih1d1), mRNA.	1.19314	13.4275
Gm12070	Mus musculus predicted gene 12070 (Gm12070), non-coding RNA.	1.19311	13.4275
Slc8a2	Mus musculus solute carrier family 8 (sodium/calcium exchanger), member 2 (Slc8a2), mRNA.	1.19199	13.4275
Gapdh	Mus musculus glyceraldehyde-3-phosphate dehydrogenase, mRNA (cDNA clone MGC:102540 IMAGE:4010884), complete cds.	1.19039	13.4275
Mrpl12	Mus musculus mitochondrial ribosomal protein L12 (Mrpl12), nuclear gene encoding mitochondrial protein, mRNA.	1.18933	13.4275
---	cdna:Genscan chromosome:NCBIM37:14:15280562:15358900:-1	1.18929	13.4275
---	cdna:Genscan chromosome:NCBIM37:15:97132945:97154398:-1	1.18828	13.4275
Polr2k	Mus musculus polymerase (RNA) II (DNA directed) polypeptide K (Polr2k), transcript variant 1, mRNA.	1.18808	13.4275
---	cdna:known chromosome:NCBIM37:12:23962793:23979571:-1 gene:ENSMUSG00000073160	1.188	13.4275
Gapdh	Mus musculus glyceraldehyde-3-phosphate dehydrogenase, mRNA (cDNA clone MGC:102543 IMAGE:5068049), complete cds.	1.18742	13.4275
---	cdna:known chromosome:NCBIM37:8:12672186:12673488:1 gene:ENSMUSG00000054910	1.18546	13.4275
Med4	Mus musculus mediator of RNA polymerase II transcription, subunit 4 homolog (yeast) (Med4), mRNA.	1.18469	13.4275
Klhdc9	Mus musculus kelch domain containing 9 (Klhdc9), mRNA.	1.18432	13.4275
Gm12070	Mus musculus predicted gene 12070 (Gm12070), non-coding RNA.	1.18318	13.4275
Sephs2	Mus musculus selenophosphate synthetase 2 (Sephs2), mRNA.	1.18245	13.4275
Gapdh	Mus musculus glyceraldehyde-3-phosphate dehydrogenase (Gapdh), mRNA.	1.18172	13.4275
Gapdh	Mus musculus glyceraldehyde-3-phosphate dehydrogenase (Gapdh), mRNA.	1.17975	13.4275
Gapdh	Mus musculus glyceraldehyde-3-phosphate dehydrogenase, mRNA (cDNA clone MGC:102540 IMAGE:4010884), complete cds.	1.17967	13.4275
Resp18	Mus musculus regulated endocrine-specific protein 18 (Resp18), mRNA.	1.1786	13.4275
Gm12070	Mus musculus predicted gene 12070 (Gm12070), non-coding RNA.	1.17796	13.4275
Gtf2f1	Mus musculus general transcription factor IIF, polypeptide 1 (Gtf2f1), mRNA.	1.17361	13.4275
Actl6a	Mus musculus actin-like 6A (Actl6a), mRNA.	1.17186	13.4275
---	cdna:pseudogene chromosome:NCBIM37:X:148379911:148380910:1 gene:ENSMUSG00000082778	1.16878	13.4275
Snora3	Mus musculus small nucleolar RNA, H/ACA box 3 (Snora3), small nucleolar RNA.	1.16842	13.4275
---	cdna:known chromosome:NCBIM37:18:54143975:54144982:1 gene:ENSMUSG00000069376	1.16739	13.4275
Purb	Mus musculus purine rich element binding protein B (Purb), mRNA.	1.16647	13.4275
Rpsa	Mus musculus ribosomal protein SA (Rpsa), mRNA.	1.16486	13.4275
Thap4	Mus musculus THAP domain containing 4 (Thap4), mRNA.	1.16447	13.4275
Cort	Mus musculus cortistatin (Cort), mRNA.	1.1625	13.4275
Fntb	Mus musculus farnesyltransferase, CAAX box, beta (Fntb), mRNA.	1.16116	13.4275
Ush1g	Mus musculus Usher syndrome 1G homolog (human) (Ush1g), mRNA.	1.1611	13.4275
Pars2	Mus musculus prolyl-tRNA synthetase (mitochondrial)(putative) (Pars2), nuclear gene encoding mitochondrial protein, transcript variant 1, mRNA.	1.16004	13.4275
Reep5	Mus musculus receptor accessory protein 5 (Reep5), mRNA.	1.15946	13.4275
Timm22	Mus musculus translocase of inner mitochondrial membrane 22 homolog (yeast) (Timm22), nuclear gene encoding mitochondrial protein, transcript variant 1, mRNA.	1.1588	13.4275
---	Putative uncharacterized protein gene:ENSMUSG00000075278	1.15484	13.4275
Prpf19	Mus musculus PRP19/PSO4 pre-mRNA processing factor 19 homolog (S. cerevisiae) (Prpf19), mRNA.	1.15322	13.4275
Rcan1	Mus musculus regulator of calcineurin 1 (Rcan1), transcript variant 1, mRNA.	1.15247	13.4275
---	cdna:pseudogene chromosome:NCBIM37:11:6142381:6142724:1 gene:ENSMUSG00000081153	1.15206	13.4275
Alx3	Mus musculus aristaless-like homeobox 3 (Alx3), mRNA.	1.1516	13.4275
Ddx28	Mus musculus DEAD (Asp-Glu-Ala-Asp) box polypeptide 28 (Ddx28), nuclear gene encoding mitochondrial protein, mRNA.	1.15062	13.4275
Mrpl33	Mus musculus mitochondrial ribosomal protein L33 (Mrpl33), nuclear gene encoding mitochondrial protein, mRNA.	1.14993	13.4275
Rpsa	Mus musculus ribosomal protein SA (Rpsa), mRNA.	1.14887	13.4275
Cdkn2aip	Mus musculus CDKN2A interacting protein (Cdkn2aip), mRNA.	1.14879	13.4275
Wdr34	Mus musculus WD repeat domain 34 (Wdr34), mRNA.	1.14411	13.4275
Ccnl2	Mus musculus cyclin L2 (Ccnl2), mRNA.	1.1434	13.4275
Ap2s1	Mus musculus adaptor-related protein complex 2, sigma 1 subunit (Ap2s1), mRNA.	1.13792	13.4275
Ndufa5	Mus musculus NADH dehydrogenase (ubiquinone) 1 alpha subcomplex, 5 (Ndufa5), nuclear gene encoding mitochondrial protein, mRNA.	1.1379	13.4275
Cmtm7	Mus musculus CKLF-like MARVEL transmembrane domain containing 7 (Cmtm7), mRNA.	1.13749	13.4275
Klhdc5	Mus musculus kelch domain containing 5, mRNA (cDNA clone MGC:182729 IMAGE:9056623), complete cds.	1.1351	13.4275
Ncaph2	Mus musculus non-SMC condensin II complex, subunit H2 (Ncaph2), transcript variant 1, mRNA.	1.13193	13.4275
Gm3002	Mus musculus predicted gene 3002 (Gm3002), non-coding RNA.	2.57715	14.0885
Fat3	Mus musculus FAT tumor suppressor homolog 3 (Drosophila) (Fat3), mRNA.	2.36897	14.0885
Otop1	Mus musculus otopetrin 1 (Otop1), mRNA.	2.24869	14.0885
C77370	Mus musculus KIAA2022 long isoform mRNA, complete cds, alternatively spliced.	2.23941	14.0885
Fat3	Mus musculus FAT tumor suppressor homolog 3 (Drosophila) (Fat3), mRNA.	2.2187	14.0885
Ret	Mus musculus ret proto-oncogene (Ret), transcript variant 4, mRNA.	2.09806	14.0885
Chd7	Mus musculus chromodomain helicase DNA binding protein 7 (Chd7), mRNA.	2.09202	14.0885
Scn2a1	Mus musculus sodium channel, voltage-gated, type II, alpha 1 (Scn2a1), mRNA.	2.08897	14.0885
Cadm2	Mus musculus cell adhesion molecule 2 (Cadm2), transcript variant 1, mRNA.	2.08631	14.0885
Gm3696	Mus musculus predicted gene 3696 (Gm3696), mRNA.	2.07308	14.0885
Dock3	Mus musculus dedicator of cyto-kinesis 3 (Dock3), mRNA.	2.0036	14.0885
Ahi1	Mus musculus Abelson helper integration site 1 (Ahi1), mRNA.	2.00007	14.0885
Kcnj3	Mus musculus potassium inwardly-rectifying channel, subfamily J, member 3 (Kcnj3), mRNA.	1.99862	14.0885
Lonrf2	Mus musculus LON peptidase N-terminal domain and ring finger 2 (Lonrf2), mRNA.	1.98542	14.0885
Clip3	Mus musculus CAP-GLY domain containing linker protein 3 (Clip3), mRNA.	1.95937	14.0885
Epb4.1l3	Mus musculus erythrocyte protein band 4.1-like 3 (Epb4.1l3), mRNA.	1.95637	14.0885
Eef1a2	Mus musculus eukaryotic translation elongation factor 1 alpha 2 (Eef1a2), mRNA.	1.94048	14.0885
Chd7	Mus musculus chromodomain helicase DNA binding protein 7 (Chd7), mRNA.	1.93892	14.0885
Chd7	Mus musculus chromodomain helicase DNA binding protein 7 (Chd7), mRNA.	1.93651	14.0885
Rap1gap	Mus musculus Rap1 GTPase-activating protein (Rap1gap), mRNA.	1.90352	14.0885
Scn3a	Mus musculus sodium channel, voltage-gated, type III, alpha (Scn3a), mRNA.	1.90159	14.0885
Atcay	Mus musculus ataxia, cerebellar, Cayman type homolog (human) (Atcay), mRNA.	1.89843	14.0885
Cbln1	Mus musculus cerebellin 1 precursor protein (Cbln1), mRNA.	1.89691	14.0885
Fat3	Mus musculus FAT tumor suppressor homolog 3 (Drosophila) (Fat3), mRNA.	1.88939	14.0885
Chd7	Mus musculus chromodomain helicase DNA binding protein 7 (Chd7), mRNA.	1.88672	14.0885
Nalcn	Mus musculus sodium leak channel, non-selective (Nalcn), mRNA.	1.85351	14.0885
Armcx2	Mus musculus armadillo repeat containing, X-linked 2 (Armcx2), transcript variant 1, mRNA.	1.85339	14.0885
---	cdna:Genscan chromosome:NCBIM37:14:4809659:4848177:1	1.84626	14.0885
Mybl1	Mus musculus myeloblastosis oncogene-like 1 (Mybl1), mRNA.	1.84502	14.0885
Usp11	Mus musculus ubiquitin specific peptidase 11 (Usp11), mRNA.	1.83622	14.0885
---	Mus musculus 15 days embryo head cDNA, RIKEN full-length enriched library, clone:D930014K24 product:hypothetical protein, full insert sequence.	1.82319	14.0885
Chd7	Mus musculus chromodomain helicase DNA binding protein 7 (Chd7), mRNA.	1.81777	14.0885
Ctnna2	Mus musculus catenin (cadherin associated protein), alpha 2 (Ctnna2), transcript variant 3, mRNA.	1.80746	14.0885
Usp51	Mus musculus ubiquitin specific protease 51 (Usp51), mRNA.	1.77109	14.0885
Pfkp	Mus musculus phosphofructokinase, platelet (Pfkp), mRNA.	1.75909	14.0885
Scamp5	Mus musculus secretory carrier membrane protein 5 (Scamp5), mRNA.	1.75439	14.0885
Fat3	Mus musculus FAT tumor suppressor homolog 3 (Drosophila) (Fat3), mRNA.	1.74844	14.0885
Bcat1	Mus musculus branched chain aminotransferase 1, cytosolic (Bcat1), transcript variant 1, mRNA.	1.74581	14.0885
Armcx4	Armadillo repeat containing, X-linked 4 gene:ENSMUSG00000049804	1.74489	14.0885
Gabrg2	Mus musculus gamma-aminobutyric acid (GABA) A receptor, subunit gamma 2 (Gabrg2), transcript variant 1, mRNA.	1.73699	14.0885
Hes6	Mus musculus hairy and enhancer of split 6 (Drosophila) (Hes6), mRNA.	1.7354	14.0885
Chd7	Mus musculus chromodomain helicase DNA binding protein 7 (Chd7), mRNA.	1.72405	14.0885
Lypd1	Mus musculus Ly6/Plaur domain containing 1 (Lypd1), mRNA.	1.7168	14.0885
Hecw1	Mus musculus HECT, C2 and WW domain containing E3 ubiquitin protein ligase 1 (Hecw1), mRNA.	1.71406	14.0885
Map4k4	Mus musculus mitogen-activated protein kinase kinase kinase kinase 4 (Map4k4), mRNA.	1.70899	14.0885
2810417H13Rik	Mus musculus RIKEN cDNA 2810417H13 gene (2810417H13Rik), mRNA.	1.68871	14.0885
Fbxl16	Mus musculus F-box and leucine-rich repeat protein 16 (Fbxl16), mRNA.	1.68739	14.0885
Rfx3	Mus musculus regulatory factor X, 3 (influences HLA class II expression) (Rfx3), transcript variant 1, mRNA.	1.67771	14.0885
Lrrn3	Mus musculus leucine rich repeat protein 3, neuronal (Lrrn3), mRNA.	1.67551	14.0885
Myh10	Mus musculus myosin, heavy polypeptide 10, non-muscle (Myh10), mRNA.	1.6709	14.0885
Dbn1	Mus musculus drebrin 1 (Dbn1), transcript variant 1, mRNA.	1.6612	14.0885
Ptpru	Mus musculus protein tyrosine phosphatase, receptor type, U (Ptpru), transcript variant 2, mRNA.	1.65946	14.0885
Gm5458	Mus musculus predicted gene 5458 (Gm5458), mRNA.	1.65675	14.0885
Oprd1	Mus musculus opioid receptor, delta 1 (Oprd1), mRNA.	1.63473	14.0885
Hunk	Mus musculus hormonally upregulated Neu-associated kinase (Hunk), mRNA.	1.63069	14.0885
Cplx2	Mus musculus complexin 2 (Cplx2), mRNA.	1.62849	14.0885
Pgr	Mus musculus progesterone receptor (Pgr), mRNA.	1.62106	14.0885
Shisa6	Mus musculus shisa homolog 6 (Xenopus laevis) (Shisa6), mRNA.	1.62091	14.0885
A030009H04Rik	Mus musculus RIKEN cDNA A030009H04 gene (A030009H04Rik), non-coding RNA.	1.6051	14.0885
Sh3gl3	Mus musculus SH3-domain GRB2-like 3 (Sh3gl3), mRNA.	1.59787	14.0885
Tekt2	Mus musculus tektin 2 (Tekt2), mRNA.	1.59708	14.0885
Sult4a1	Mus musculus sulfotransferase family 4A, member 1 (Sult4a1), mRNA.	1.59132	14.0885
Asphd1	Mus musculus aspartate beta-hydroxylase domain containing 1 (Asphd1), mRNA.	1.58875	14.0885
Svop	Mus musculus SV2 related protein (Svop), mRNA.	1.58368	14.0885
Spats2	Mus musculus spermatogenesis associated, serine-rich 2 (Spats2), mRNA.	1.58281	14.0885
Ric3	Mus musculus resistance to inhibitors of cholinesterase 3 homolog (C. elegans) (Ric3), transcript variant 1, mRNA.	1.57827	14.0885
Ccne2	Mus musculus cyclin E2 (Ccne2), transcript variant 2, mRNA.	1.57608	14.0885
Klc1	Mus musculus kinesin light chain 1 (Klc1), transcript variant d, mRNA.	1.57341	14.0885
BC057079	Mus musculus cDNA sequence BC057079 (BC057079), mRNA.	1.57224	14.0885
Slc6a17	Mus musculus solute carrier family 6 (neurotransmitter transporter), member 17 (Slc6a17), mRNA.	1.56295	14.0885
Ncald	Mus musculus neurocalcin delta (Ncald), transcript variant 1, mRNA.	1.56222	14.0885
Gm2897	Mus musculus predicted gene 2897 (Gm2897), transcript variant 1, mRNA.	1.5585	14.0885
Mir491	Mus musculus microRNA 491 (Mir491), microRNA.	1.54261	14.0885
Acsl6	Mus musculus acyl-CoA synthetase long-chain family member 6 (Acsl6), transcript variant 3, mRNA.	1.53951	14.0885
Celsr1	Mus musculus cadherin, EGF LAG seven-pass G-type receptor 1 (flamingo homolog, Drosophila) (Celsr1), mRNA.	1.53357	14.0885
Slc7a3	Mus musculus solute carrier family 7 (cationic amino acid transporter, y+ system), member 3 (Slc7a3), mRNA.	1.5298	14.0885
Gpr156	Mus musculus G protein-coupled receptor 156 (Gpr156), mRNA.	1.52887	14.0885
Igfbp3	Mus musculus insulin-like growth factor binding protein 3 (Igfbp3), mRNA.	1.52181	14.0885
Pde1c	Mus musculus phosphodiesterase 1C (Pde1c), transcript variant 4, mRNA.	1.51513	14.0885
Etv5	Mus musculus ets variant gene 5 (Etv5), mRNA.	1.51218	14.0885
Cerk	Mus musculus ceramide kinase (Cerk), mRNA.	1.50647	14.0885
C330027C09Rik	Mus musculus RIKEN cDNA C330027C09 gene (C330027C09Rik), mRNA.	1.50156	14.0885
Dmbx1	Mus musculus diencephalon/mesencephalon homeobox 1 (Dmbx1), transcript variant 1, mRNA.	1.4968	14.0885
Parp6	Mus musculus poly (ADP-ribose) polymerase family, member 6 (Parp6), mRNA.	1.4937	14.0885
Dnmt3a	Mus musculus DNA methyltransferase 3A (Dnmt3a), transcript variant 1, mRNA.	1.48954	14.0885
Dtx1	Mus musculus deltex 1 homolog (Drosophila) (Dtx1), mRNA.	1.48608	14.0885
Mtap2	Mus musculus microtubule-associated protein 2 (Mtap2), transcript variant 1, mRNA.	1.47724	14.0885
Rnf144a	Mus musculus ring finger protein 144A (Rnf144a), transcript variant 1, mRNA.	1.46439	14.0885
Rgs3	Mus musculus regulator of G-protein signaling 3 (Rgs3), transcript variant 1, mRNA.	1.46328	14.0885
Psrc1	Mus musculus proline/serine-rich coiled-coil 1 (Psrc1), transcript variant 2, mRNA.	1.46212	14.0885
Adcy3	Mus musculus adenylate cyclase 3 (Adcy3), transcript variant 3, mRNA.	1.4617	14.0885
Igfbpl1	Mus musculus insulin-like growth factor binding protein-like 1 (Igfbpl1), mRNA.	1.46016	14.0885
Fat3	Mus musculus FAT tumor suppressor homolog 3 (Drosophila) (Fat3), mRNA.	1.45155	14.0885
Fam102b	Mus musculus family with sequence similarity 102, member B (Fam102b), mRNA.	1.44849	14.0885
Fgd3	Mus musculus FYVE, RhoGEF and PH domain containing 3 (Fgd3), mRNA.	1.44842	14.0885
Fsd1	Mus musculus fibronectin type 3 and SPRY domain-containing protein (Fsd1), mRNA.	1.44794	14.0885
Lhfpl5	Mus musculus lipoma HMGIC fusion partner-like 5 (Lhfpl5), mRNA.	1.44773	14.0885
Fam123c	Mus musculus family with sequence similarity 123, member C (Fam123c), mRNA.	1.44564	14.0885
Smarcd1	Mus musculus SWI/SNF related, matrix associated, actin dependent regulator of chromatin, subfamily d, member 1 (Smarcd1), mRNA.	1.44467	14.0885
Ier5	Mus musculus immediate early response 5 (Ier5), mRNA.	1.43569	14.0885
Cdc7	Mus musculus cell division cycle 7 (S. cerevisiae) (Cdc7), mRNA.	1.43017	14.0885
Mlf1	Mus musculus myeloid leukemia factor 1 (Mlf1), transcript variant 1, mRNA.	1.42377	14.0885
H2afy	Mus musculus H2A histone family, member Y (H2afy), transcript variant 1, mRNA.	1.42186	14.0885
Lrrc9	Mus musculus leucine rich repeat containing 9 (Lrrc9), transcript variant 1, mRNA.	1.42176	14.0885
Pcyox1l	Mus musculus prenylcysteine oxidase 1 like (Pcyox1l), mRNA.	1.42133	14.0885
Arhgap39	Mus musculus Rho GTPase activating protein 39 (Arhgap39), transcript variant 1, mRNA.	1.41672	14.0885
Kcnh6	Mus musculus potassium voltage-gated channel, subfamily H (eag-related), member 6 (Kcnh6), mRNA.	1.41148	14.0885
Hist2h3c2-ps	Mus musculus histone cluster 2, H3c2, pseudogene (Hist2h3c2-ps), mRNA.	1.41005	14.0885
Atp1a2	Mus musculus ATPase, Na+/K+ transporting, alpha 2 polypeptide (Atp1a2), mRNA.	1.40897	14.0885
Drd2	Mus musculus dopamine receptor D2 (Drd2), mRNA.	1.39206	14.0885
Cyp39a1	Mus musculus cytochrome P450, family 39, subfamily a, polypeptide 1 (Cyp39a1), mRNA.	1.38842	14.0885
Fam171a2	Mus musculus family with sequence similarity 171, member A2 (Fam171a2), mRNA.	1.3849	14.0885
Rab3a	Mus musculus RAB3A, member RAS oncogene family (Rab3a), transcript variant 1, mRNA.	1.37901	14.0885
Efhc2	Mus musculus EF-hand domain (C-terminal) containing 2 (Efhc2), mRNA.	1.37631	14.0885
Grik5	Mus musculus glutamate receptor, ionotropic, kainate 5 (gamma 2) (Grik5), mRNA.	1.37339	14.0885
Erc2	Mus musculus ELKS/RAB6-interacting/CAST family member 2 (Erc2), mRNA.	1.37042	14.0885
Slc27a3	Mus musculus solute carrier family 27 (fatty acid transporter), member 3 (Slc27a3), mRNA.	1.3683	14.0885
Pknox1	Mus musculus Pbx/knotted 1 homeobox (Pknox1), transcript variant 1, mRNA.	1.36788	14.0885
Cdr2l	Mus musculus cerebellar degeneration-related protein 2-like (Cdr2l), mRNA.	1.36778	14.0885
Acap3	Mus musculus ArfGAP with coiled-coil, ankyrin repeat and PH domains 3 (Acap3), mRNA.	1.36422	14.0885
Ano8	Mus musculus anoctamin 8 (Ano8), mRNA.	1.3635	14.0885
Zfp821	Mus musculus zinc finger protein 821 (Zfp821), transcript variant 1, mRNA.	1.35597	14.0885
Dtl	Mus musculus denticleless homolog (Drosophila) (Dtl), mRNA.	1.35484	14.0885
Ube2o	Mus musculus ubiquitin-conjugating enzyme E2O (Ube2o), mRNA.	1.35338	14.0885
Sephs1	Mus musculus selenophosphate synthetase 1 (Sephs1), mRNA.	1.3527	14.0885
Ttc9b	Mus musculus tetratricopeptide repeat domain 9B (Ttc9b), mRNA.	1.34206	14.0885
Odf2	Mus musculus outer dense fiber of sperm tails 2 (Odf2), transcript variant 1, mRNA.	1.34186	14.0885
2810408A11Rik	Mus musculus RIKEN cDNA 2810408A11 gene (2810408A11Rik), mRNA.	1.33892	14.0885
Ky	Mus musculus kyphoscoliosis peptidase (Ky), mRNA.	1.33803	14.0885
Snrnp25	Mus musculus small nuclear ribonucleoprotein 25 (U11/U12) (Snrnp25), mRNA.	1.33703	14.0885
Praf2	Mus musculus PRA1 domain family 2 (Praf2), mRNA.	1.33345	14.0885
Tead1	Mus musculus TEA domain family member 1 (Tead1), transcript variant 1, mRNA.	1.33111	14.0885
Rbbp8	Mus musculus retinoblastoma binding protein 8 (Rbbp8), mRNA.	1.32557	14.0885
Spna2	Mus musculus spectrin alpha 2 (Spna2), transcript variant 1, mRNA.	1.31935	14.0885
Gpr137b	Mus musculus G protein-coupled receptor 137B (Gpr137b), mRNA.	1.31668	14.0885
AA388235	Mus musculus expressed sequence AA388235 (AA388235), non-coding RNA.	1.31519	14.0885
Gm14207	Mus musculus predicted gene 14207 (Gm14207), non-coding RNA.	1.31396	14.0885
Psd	Mus musculus pleckstrin and Sec7 domain containing (Psd), mRNA.	1.31001	14.0885
Ybx2	Mus musculus Y box protein 2 (Ybx2), mRNA.	1.3057	14.0885
Rasl10b	Mus musculus RAS-like, family 10, member B (Rasl10b), mRNA.	1.30555	14.0885
Lmtk3	Mus musculus lemur tyrosine kinase 3 (Lmtk3), mRNA.	1.30279	14.0885
Anln	Mus musculus anillin, actin binding protein (Anln), mRNA.	1.29778	14.0885
C330021F23Rik	Mus musculus RIKEN cDNA C330021F23 gene (C330021F23Rik), mRNA.	1.29732	14.0885
---	cdna:known chromosome:NCBIM37:7:103358655:103358918:1 gene:ENSMUSG00000066336	1.29684	14.0885
Rab3b	Mus musculus RAB3B, member RAS oncogene family (Rab3b), mRNA.	1.29608	14.0885
Eef1e1	Mus musculus eukaryotic translation elongation factor 1 epsilon 1 (Eef1e1), mRNA.	1.29044	14.0885
1700020C11Rik	Mus musculus RIKEN cDNA 1700020C11 gene (1700020C11Rik), mRNA.	1.28835	14.0885
Rnf26	Mus musculus ring finger protein 26 (Rnf26), mRNA.	1.28533	14.0885
---	gi|34538597|ref|NC_005089.1|:3845-3913, tRNA-Met	1.28374	14.0885
D130043K22Rik	Mus musculus RIKEN cDNA D130043K22 gene, mRNA (cDNA clone MGC:141537 IMAGE:40086616), complete cds.	1.28281	14.0885
Hoxa7	Mus musculus homeobox A7 (Hoxa7), mRNA.	1.28079	14.0885
Igsf9b	Mus musculus immunoglobulin superfamily, member 9B (Igsf9b), transcript variant 1, mRNA.	1.28003	14.0885
Atp2b3	Mus musculus ATPase, Ca++ transporting, plasma membrane 3 (Atp2b3), mRNA.	1.27792	14.0885
Coro1c	Mus musculus coronin, actin binding protein 1C (Coro1c), mRNA.	1.2777	14.0885
Polr2a	Mus musculus polymerase (RNA) II (DNA directed) polypeptide A (Polr2a), mRNA.	1.27717	14.0885
Neurl1a	Mus musculus neuralized homolog 1A (Drosophila) (Neurl1a), transcript variant 1, mRNA.	1.27658	14.0885
Ephx4	Mus musculus epoxide hydrolase 4 (Ephx4), mRNA.	1.27637	14.0885
Gm7120	Mus musculus predicted gene 7120 (Gm7120), transcript variant 1, mRNA.	1.27585	14.0885
---	cdna:Genscan chromosome:NCBIM37:19:47226099:47255465:-1	1.2724	14.0885
Fam132b	Mus musculus family with sequence similarity 132, member B (Fam132b), mRNA.	1.27234	14.0885
Wdr8	Mus musculus WD repeat domain 8 (Wdr8), mRNA.	1.27137	14.0885
---	Mus musculus gene for U50 snoRNA, complete sequence.	1.26572	14.0885
---	Mus musculus gene for U50 snoRNA, complete sequence.	1.26572	14.0885
Cstf2	Mus musculus cleavage stimulation factor, 3' pre-RNA subunit 2 (Cstf2), mRNA.	1.26376	14.0885
Zbed4	Mus musculus zinc finger, BED domain containing 4 (Zbed4), mRNA.	1.2614	14.0885
Lrfn1	Mus musculus leucine rich repeat and fibronectin type III domain containing 1 (Lrfn1), transcript variant 1, mRNA.	1.25916	14.0885
Plxna3	Mus musculus plexin A3 (Plxna3), mRNA.	1.25883	14.0885
---	cdna:pseudogene chromosome:NCBIM37:11:6140212:6140520:1 gene:ENSMUSG00000082640	1.25714	14.0885
Ppp5c	Mus musculus protein phosphatase 5, catalytic subunit (Ppp5c), mRNA.	1.25651	14.0885
Enho	Mus musculus energy homeostasis associated (Enho), mRNA.	1.25533	14.0885
Sart3	Mus musculus squamous cell carcinoma antigen recognized by T-cells 3 (Sart3), mRNA.	1.25437	14.0885
---	cdna:known chromosome:NCBIM37:12:101122829:101123356:1 gene:ENSMUSG00000072886	1.25255	14.0885
Map3k10	Mus musculus mitogen-activated protein kinase kinase kinase 10 (Map3k10), mRNA.	1.25225	14.0885
1700021K19Rik	Mus musculus RIKEN cDNA 1700021K19 gene (1700021K19Rik), mRNA.	1.25083	14.0885
Fxn	Mus musculus frataxin (Fxn), nuclear gene encoding mitochondrial protein, mRNA.	1.25078	14.0885
Dpf1	Mus musculus D4, zinc and double PHD fingers family 1 (Dpf1), mRNA.	1.24932	14.0885
Mast2	Mus musculus microtubule associated serine/threonine kinase 2 (Mast2), transcript variant 1, mRNA.	1.24822	14.0885
1700067K01Rik	Mus musculus RIKEN cDNA 1700067K01 gene (1700067K01Rik), mRNA.	1.24706	14.0885
Zmynd19	Mus musculus zinc finger, MYND domain containing 19 (Zmynd19), mRNA.	1.24327	14.0885
Ankrd52	Mus musculus ankyrin repeat domain 52 (Ankrd52), mRNA.	1.24316	14.0885
---	gi|34538597|ref|NC_005089.1|:9808-9875, tRNA-Arg	1.24116	14.0885
Cd2bp2	Mus musculus CD2 antigen (cytoplasmic tail) binding protein 2 (Cd2bp2), mRNA.	1.23854	14.0885
Snrpd2	Mus musculus small nuclear ribonucleoprotein D2 (Snrpd2), mRNA.	1.23614	14.0885
Ttll1	Mus musculus tubulin tyrosine ligase-like 1 (Ttll1), mRNA.	1.23505	14.0885
Gemin6	Mus musculus gem (nuclear organelle) associated protein 6 (Gemin6), mRNA.	1.23461	14.0885
---	ncrna:rRNA chromosome:NCBIM37:6:60200786:60200904:1 gene:ENSMUSG00000064515	1.23225	14.0885
Usp1	Mus musculus ubiquitin specific peptidase 1 (Usp1), mRNA.	1.23222	14.0885
Pck1	Mus musculus phosphoenolpyruvate carboxykinase 1, cytosolic (Pck1), mRNA.	1.22857	14.0885
---	cdna:Genscan chromosome:NCBIM37:5:42244546:42245449:-1	1.22717	14.0885
Cks1b	Mus musculus CDC28 protein kinase 1b (Cks1b), mRNA.	1.22627	14.0885
Zfp637	Mus musculus zinc finger protein 637 (Zfp637), mRNA.	1.22407	14.0885
Znrf1	Mus musculus zinc and ring finger 1 (Znrf1), transcript variant 1, mRNA.	1.22115	14.0885
Zfp319	Mus musculus zinc finger protein 319 (Zfp319), mRNA.	1.21947	14.0885
Igfals	Mus musculus insulin-like growth factor binding protein, acid labile subunit (Igfals), mRNA.	1.21861	14.0885
Hnrnpl	Mus musculus heterogeneous nuclear ribonucleoprotein L (Hnrnpl), mRNA.	1.21786	14.0885
Dcaf15	Mus musculus DDB1 and CUL4 associated factor 15 (Dcaf15), mRNA.	1.21736	14.0885
Nop56	Mus musculus NOP56 ribonucleoprotein homolog (yeast) (Nop56), mRNA.	1.21661	14.0885
Bdnf	Mus musculus brain derived neurotrophic factor (Bdnf), transcript variant 2, mRNA.	1.21596	14.0885
Dgkz	Mus musculus diacylglycerol kinase zeta (Dgkz), transcript variant 1, mRNA.	1.21501	14.0885
Mir138-2	Mus musculus microRNA 138-2 (Mir138-2), microRNA.	1.21497	14.0885
Mt3	Mus musculus metallothionein 3 (Mt3), mRNA.	1.2122	14.0885
Mir665	Mus musculus microRNA 665 (Mir665), microRNA.	1.20943	14.0885
Ssx2ip	Mus musculus synovial sarcoma, X breakpoint 2 interacting protein (Ssx2ip), mRNA.	1.20883	14.0885
Fkbp1a	Mus musculus FK506 binding protein 1a (Fkbp1a), mRNA.	1.20786	14.0885
Adam8	Mus musculus a disintegrin and metallopeptidase domain 8 (Adam8), mRNA.	1.20644	14.0885
---	ncrna:snoRNA chromosome:NCBIM37:12:103491684:103491897:-1 gene:ENSMUSG00000064776	1.20484	14.0885
Mapk7	Mus musculus mitogen-activated protein kinase 7 (Mapk7), mRNA.	1.20047	14.0885
Pik3r2	Mus musculus phosphatidylinositol 3-kinase, regulatory subunit, polypeptide 2 (p85 beta) (Pik3r2), mRNA.	1.20025	14.0885
2011-03-09	Mus musculus membrane-associated ring finger (C3HC4) 9 (March9), mRNA.	1.19763	14.0885
2310061C15Rik	Mus musculus RIKEN cDNA 2310061C15 gene (2310061C15Rik), mRNA.	1.19643	14.0885
Phf19	Mus musculus PHD finger protein 19 (Phf19), mRNA.	1.19619	14.0885
Nacc1	Mus musculus nucleus accumbens associated 1, BEN and BTB (POZ) domain containing (Nacc1), mRNA.	1.19618	14.0885
Lrwd1	Mus musculus leucine-rich repeats and WD repeat domain containing 1 (Lrwd1), mRNA.	1.19597	14.0885
Taf6l	Mus musculus TAF6-like RNA polymerase II, p300/CBP-associated factor (PCAF)-associated factor (Taf6l), transcript variant 1, mRNA.	1.19595	14.0885
Rassf1	Mus musculus Ras association (RalGDS/AF-6) domain family member 1 (Rassf1), mRNA.	1.19419	14.0885
Ctbp1	Mus musculus C-terminal binding protein 1 (Ctbp1), mRNA.	1.19366	14.0885
Zbtb46	Mus musculus zinc finger and BTB domain containing 46 (Zbtb46), transcript variant 2, mRNA.	1.19278	14.0885
Scaf1	Mus musculus SR-related CTD-associated factor 1 (Scaf1), mRNA.	1.19218	14.0885
Klhdc4	Mus musculus kelch domain containing 4 (Klhdc4), mRNA.	1.19167	14.0885
Eef1g	Mus musculus eukaryotic translation elongation factor 1 gamma (Eef1g), mRNA.	1.19133	14.0885
---	cdna:pseudogene chromosome:NCBIM37:2:181631528:181633417:1 gene:ENSMUSG00000083397	1.19058	14.0885
Dnajc8	Mus musculus DnaJ (Hsp40) homolog, subfamily C, member 8 (Dnajc8), mRNA.	1.1897	14.0885
Dlgap2	Mus musculus discs, large (Drosophila) homolog-associated protein 2 (Dlgap2), transcript variant 1, mRNA.	1.18937	14.0885
Frs3	Mus musculus fibroblast growth factor receptor substrate 3 (Frs3), mRNA.	1.1887	14.0885
Gpr176	Mus musculus G protein-coupled receptor 176 (Gpr176), mRNA.	1.18724	14.0885
Cnot1	Mus musculus CCR4-NOT transcription complex, subunit 1 (Cnot1), transcript variant 1, mRNA.	1.18224	14.0885
Azi1	Mus musculus 5-azacytidine induced gene 1 (Azi1), mRNA.	1.18182	14.0885
Gapdh	Mus musculus glyceraldehyde-3-phosphate dehydrogenase (Gapdh), mRNA.	1.1811	14.0885
Fabp5l2 // Fabp5l2	Uncharacterized protein gene:ENSMUSG00000062196	1.17838	14.0885
Ier5l	Mus musculus immediate early response 5-like (Ier5l), mRNA.	1.17785	14.0885
---	cdna:known chromosome:NCBIM37:11:58816412:58820795:1 gene:ENSMUSG00000072902	1.17676	14.0885
Gapdh	Mus musculus glyceraldehyde-3-phosphate dehydrogenase (Gapdh), mRNA.	1.17604	14.0885
Chmp6	Mus musculus chromatin modifying protein 6 (Chmp6), mRNA.	1.17575	14.0885
Mus81	Mus musculus MUS81 endonuclease homolog (yeast) (Mus81), mRNA.	1.17542	14.0885
Zfp365	Mus musculus zinc finger protein 365 (Zfp365), mRNA.	1.17536	14.0885
Gm10493	Putative uncharacterized protein gene:ENSMUSG00000073367	1.17524	14.0885
Gapdh	Mus musculus glyceraldehyde-3-phosphate dehydrogenase (GAPDH) mRNA, complete cds.	1.17493	14.0885
Gapdh	Mus musculus glyceraldehyde-3-phosphate dehydrogenase (Gapdh), mRNA.	1.17346	14.0885
Gapdh	Mus musculus glyceraldehyde-3-phosphate dehydrogenase (Gapdh), mRNA.	1.17314	14.0885
Gapdh	Mus musculus glyceraldehyde-3-phosphate dehydrogenase (Gapdh), mRNA.	1.17314	14.0885
Gapdh	Mus musculus glyceraldehyde-3-phosphate dehydrogenase (Gapdh), mRNA.	1.17174	14.0885
Gm5177	Mus musculus predicted pseudogene 5177 (Gm5177), non-coding RNA.	1.17145	14.0885
Rbm19	Mus musculus RNA binding motif protein 19 (Rbm19), mRNA.	1.17069	14.0885
Gapdh	Mus musculus glyceraldehyde-3-phosphate dehydrogenase (Gapdh), mRNA.	1.17056	14.0885
Gapdh	Mus musculus glyceraldehyde-3-phosphate dehydrogenase (Gapdh), mRNA.	1.17031	14.0885
Egln1	Mus musculus EGL nine homolog 1 (C. elegans) (Egln1), mRNA.	1.1689	14.0885
Rpsa	Mus musculus ribosomal protein SA (Rpsa), mRNA.	1.16859	14.0885
Scrt2	Mus musculus scratch homolog 2, zinc finger protein (Drosophila) (Scrt2), mRNA.	1.16846	14.0885
Mtap1s	Mus musculus microtubule-associated protein 1S (Mtap1s), mRNA.	1.16783	14.0885
Cdca4	Mus musculus cell division cycle associated 4 (Cdca4), mRNA.	1.16772	14.0885
---	cdna:Genscan chromosome:NCBIM37:Y:2621079:2631670:1	1.16721	14.0885
Phpt1	Mus musculus phosphohistidine phosphatase 1 (Phpt1), mRNA.	1.16604	14.0885
Snora3	Mus musculus small nucleolar RNA, H/ACA box 3 (Snora3), small nucleolar RNA.	1.16577	14.0885
Tusc5	Mus musculus tumor suppressor candidate 5 (Tusc5), mRNA.	1.16461	14.0885
Ankrd54	Mus musculus ankyrin repeat domain 54 (Ankrd54), mRNA.	1.16415	14.0885
Cuedc1	Mus musculus CUE domain containing 1 (Cuedc1), transcript variant 1, mRNA.	1.16363	14.0885
Rbm15b	Putative uncharacterized protein gene:ENSMUSG00000074102	1.16259	14.0885
Npepl1	Mus musculus aminopeptidase-like 1 (Npepl1), mRNA.	1.16176	14.0885
Ndufb5	Mus musculus NADH dehydrogenase (ubiquinone) 1 beta subcomplex, 5 (Ndufb5), nuclear gene encoding mitochondrial protein, mRNA.	1.16076	14.0885
Mdh2	Mus musculus malate dehydrogenase 2, NAD (mitochondrial) (Mdh2), nuclear gene encoding mitochondrial protein, mRNA.	1.15995	14.0885
Gtpbp1	Mus musculus GTP binding protein 1 (Gtpbp1), mRNA.	1.15845	14.0885
Gapdh	Mus musculus glyceraldehyde-3-phosphate dehydrogenase (Gapdh), mRNA.	1.15834	14.0885
Gapdh	Mus musculus glyceraldehyde-3-phosphate dehydrogenase (Gapdh), mRNA.	1.15834	14.0885
Gapdh	Mus musculus glyceraldehyde-3-phosphate dehydrogenase (Gapdh), mRNA.	1.15834	14.0885
Gm10293	similar to Glyceraldehyde-3-phosphate dehydrogenase gene:ENSMUSG00000070490	1.15615	14.0885
Impdh2	Mus musculus inosine 5'-phosphate dehydrogenase 2 (Impdh2), mRNA.	1.15462	14.0885
Fbl	Mus musculus fibrillarin (Fbl), mRNA.	1.15395	14.0885
AI846148	Mus musculus expressed sequence AI846148 (AI846148), transcript variant 1, mRNA.	1.15392	14.0885
Cables2	Mus musculus CDK5 and Abl enzyme substrate 2 (Cables2), mRNA.	1.1533	14.0885
Kcnd3	Mus musculus potassium voltage-gated channel, Shal-related family, member 3 (Kcnd3), transcript variant 1, mRNA.	1.15275	14.0885
Coq6	Mus musculus coenzyme Q6 homolog (yeast) (Coq6), nuclear gene encoding mitochondrial protein, mRNA.	1.15107	14.0885
Gas2l2	Mus musculus growth arrest-specific 2 like 2 (Gas2l2), mRNA.	1.15064	14.0885
Gna11	Mus musculus guanine nucleotide binding protein, alpha 11 (Gna11), mRNA.	1.14975	14.0885
Qrich2	Mus musculus glutamine rich 2 (Qrich2), mRNA.	1.14681	14.0885
Pprc1	Mus musculus peroxisome proliferative activated receptor, gamma, coactivator-related 1 (Pprc1), mRNA.	1.14604	14.0885
---	ncrna:miRNA chromosome:NCBIM37:10:5310251:5310342:1 gene:ENSMUSG00000089523	1.14575	14.0885
Icam5	Mus musculus intercellular adhesion molecule 5, telencephalin (Icam5), mRNA.	1.14562	14.0885
---	cdna:pseudogene chromosome:NCBIM37:8:99951612:99953010:-1 gene:ENSMUSG00000081111	1.14268	14.0885
Mrpl3	Mus musculus mitochondrial ribosomal protein L3 (Mrpl3), nuclear gene encoding mitochondrial protein, mRNA.	1.14084	14.0885
Tomm40	Mus musculus translocase of outer mitochondrial membrane 40 homolog (yeast) (Tomm40), nuclear gene encoding mitochondrial protein, transcript variant 1, mRNA.	1.13817	14.0885
Arl2bp	Mus musculus ADP-ribosylation factor-like 2 binding protein (Arl2bp), transcript variant 1, mRNA.	1.13801	14.0885
Wdr89	Mus musculus WD repeat domain 89 (Wdr89), mRNA.	1.13538	14.0885
Men1	Mus musculus multiple endocrine neoplasia 1 (Men1), transcript variant 2, mRNA.	1.1353	14.0885
BC002230	Mus musculus cDNA sequence BC002230 (BC002230), mRNA.	1.13413	14.0885
Hmx3	Mus musculus H6 homeobox 3 (Hmx3), mRNA.	1.13173	14.0885
---	cdna:pseudogene chromosome:NCBIM37:16:21079743:21080739:1 gene:ENSMUSG00000086936	1.1312	14.0885
Nlrp6	Mus musculus NLR family, pyrin domain containing 6 (Nlrp6), mRNA.	1.13023	14.0885
Slain2	Mus musculus SLAIN motif family, member 2 (Slain2), transcript variant 1, mRNA.	1.13008	14.0885
Mir342	Mus musculus microRNA 342 (Mir342), microRNA.	1.12384	14.0885
---	cdna:pseudogene chromosome:NCBIM37:5:148994475:148995953:-1 gene:ENSMUSG00000066554	1.12156	14.0885
Rprl1	Mus musculus ribonuclease P RNA-like 1 (Rprl1), RNase P RNA.	1.12075	14.0885
Keg1	Mus musculus kidney expressed gene 1 (Keg1), mRNA.	1.11643	14.0885
Nfic	Mus musculus nuclear factor I/C (Nfic), transcript variant 1, mRNA.	1.11516	14.0885
---	cdna:pseudogene chromosome:NCBIM37:13:13511030:13511436:-1 gene:ENSMUSG00000057945	1.10436	14.0885
---	ncrna:snoRNA chromosome:NCBIM37:7:67049641:67049734:-1 gene:ENSMUSG00000075723	2.67629	15.1968
Kcnmb2	Mus musculus potassium large conductance calcium-activated channel, subfamily M, beta member 2 (Kcnmb2), mRNA.	2.52215	15.1968
Gria2	Mus musculus glutamate receptor, ionotropic, AMPA2 (alpha 2) (Gria2), transcript variant 1, mRNA.	2.47651	15.1968
Grik2	Mus musculus glutamate receptor, ionotropic, kainate 2 (beta 2) (Grik2), transcript variant 2, mRNA.	2.44105	15.1968
Gria4	Mus musculus glutamate receptor, ionotropic, AMPA4 (alpha 4) (Gria4), transcript variant 1, mRNA.	2.21333	15.1968
Neurod4	Mus musculus neurogenic differentiation 4 (Neurod4), mRNA.	2.18584	15.1968
Slc38a11	Mus musculus solute carrier family 38, member 11 (Slc38a11), mRNA.	2.09641	15.1968
2011-09-03	Mus musculus septin 3 (Sept3), mRNA.	2.0804	15.1968
Tagln3	Mus musculus transgelin 3 (Tagln3), mRNA.	2.06489	15.1968
Pkia	Mus musculus protein kinase inhibitor, alpha (Pkia), mRNA.	2.06108	15.1968
Hoxd8	Mus musculus homeobox D8 (Hoxd8), mRNA.	2.05959	15.1968
Sgip1	Mus musculus SH3-domain GRB2-like (endophilin) interacting protein 1 (Sgip1), mRNA.	2.05872	15.1968
Crtac1	Mus musculus cartilage acidic protein 1 (Crtac1), mRNA.	1.98447	15.1968
Pdzrn4	Mus musculus PDZ domain containing RING finger 4 (Pdzrn4), transcript variant 2, mRNA.	1.97804	15.1968
Wnk3-ps	Mus musculus WNK lysine deficient protein kinase 3, mRNA (cDNA clone IMAGE:6408904), partial cds.	1.97405	15.1968
Snap25	Mus musculus synaptosomal-associated protein 25 (Snap25), mRNA.	1.96892	15.1968
Chd7	Mus musculus chromodomain helicase DNA binding protein 7 (Chd7), mRNA.	1.96736	15.1968
Syt11	Mus musculus synaptotagmin XI (Syt11), mRNA.	1.96605	15.1968
Chd7	Mus musculus chromodomain helicase DNA binding protein 7 (Chd7), mRNA.	1.93513	15.1968
Ncam2	Mus musculus neural cell adhesion molecule 2 (Ncam2), transcript variant 1, mRNA.	1.88191	15.1968
Rbfox1	Mus musculus RNA binding protein, fox-1 homolog (C. elegans) 1 (Rbfox1), transcript variant 2, mRNA.	1.87969	15.1968
Kif5a	Mus musculus kinesin family member 5A (Kif5a), transcript variant 1, mRNA.	1.86732	15.1968
Cyfip2	Mus musculus cytoplasmic FMR1 interacting protein 2 (Cyfip2), mRNA.	1.84965	15.1968
Lgi1	Mus musculus leucine-rich repeat LGI family, member 1 (Lgi1), mRNA.	1.84138	15.1968
Chd7	Mus musculus chromodomain helicase DNA binding protein 7 (Chd7), mRNA.	1.83009	15.1968
Tet1	Mus musculus tet oncogene 1 (Tet1), mRNA.	1.82832	15.1968
Mapk10	Mus musculus mitogen-activated protein kinase 10 (Mapk10), transcript variant 1, mRNA.	1.82386	15.1968
Gm1973	Mus musculus predicted gene 1973 (Gm1973), mRNA.	1.82379	15.1968
Id4	Mus musculus inhibitor of DNA binding 4 (Id4), mRNA.	1.81754	15.1968
Robo2	Mus musculus roundabout homolog 2 (Drosophila) (Robo2), mRNA.	1.81011	15.1968
Msi1	Mus musculus Musashi homolog 1(Drosophila) (Msi1), mRNA.	1.79449	15.1968
D830030K20Rik	Mus musculus RIKEN cDNA D830030K20 gene (D830030K20Rik), mRNA.	1.79275	15.1968
Fat3	Mus musculus FAT tumor suppressor homolog 3 (Drosophila) (Fat3), mRNA.	1.78106	15.1968
Nrsn1	Mus musculus neurensin 1 (Nrsn1), mRNA.	1.76902	15.1968
Chd7	Mus musculus chromodomain helicase DNA binding protein 7 (Chd7), mRNA.	1.75856	15.1968
Chd7	Mus musculus chromodomain helicase DNA binding protein 7 (Chd7), mRNA.	1.7356	15.1968
Cacnb4	Mus musculus calcium channel, voltage-dependent, beta 4 subunit (Cacnb4), transcript variant 1, mRNA.	1.72759	15.1968
Hoxd4	Mus musculus homeobox D4 (Hoxd4), mRNA.	1.7263	15.1968
Ncam1	Mus musculus neural cell adhesion molecule 1 (Ncam1), transcript variant 1, mRNA.	1.7257	15.1968
Slc29a4	Mus musculus solute carrier family 29 (nucleoside transporters), member 4 (Slc29a4), mRNA.	1.72431	15.1968
Nrcam	Mus musculus neuron-glia-CAM-related cell adhesion molecule (Nrcam), transcript variant 1, mRNA.	1.72215	15.1968
4930452B06Rik	Mus musculus RIKEN cDNA 4930452B06 gene (4930452B06Rik), mRNA.	1.72129	15.1968
Gm5458	Mus musculus predicted gene 5458 (Gm5458), mRNA.	1.72129	15.1968
Kcnq2	Mus musculus potassium voltage-gated channel, subfamily Q, member 2 (Kcnq2), transcript variant 1, mRNA.	1.71681	15.1968
Arnt2	Mus musculus aryl hydrocarbon receptor nuclear translocator 2 (Arnt2), mRNA.	1.70962	15.1968
Tubb2b	Mus musculus tubulin, beta 2B (Tubb2b), mRNA.	1.70682	15.1968
Ndst3	Mus musculus N-deacetylase/N-sulfotransferase (heparan glucosaminyl) 3 (Ndst3), mRNA.	1.70302	15.1968
Usp13	Mus musculus ubiquitin specific peptidase 13 (isopeptidase T-3) (Usp13), mRNA.	1.69459	15.1968
Tspyl4	Mus musculus TSPY-like 4 (Tspyl4), mRNA.	1.69322	15.1968
Ece2	Mus musculus endothelin converting enzyme 2 (Ece2), transcript variant 4, mRNA.	1.6852	15.1968
Chd7	Mus musculus chromodomain helicase DNA binding protein 7 (Chd7), mRNA.	1.67783	15.1968
Mex3b	Mus musculus mex3 homolog B (C. elegans) (Mex3b), mRNA.	1.67307	15.1968
Irak1bp1	Mus musculus interleukin-1 receptor-associated kinase 1 binding protein 1 (Irak1bp1), transcript variant 1, mRNA.	1.67094	15.1968
Cnih2	Mus musculus cornichon homolog 2 (Drosophila) (Cnih2), mRNA.	1.66443	15.1968
Rnf165	Mus musculus ring finger protein 165 (Rnf165), mRNA.	1.65786	15.1968
Tmod2	Mus musculus tropomodulin 2 (Tmod2), transcript variant 2, mRNA.	1.64878	15.1968
Lhx2	Mus musculus LIM homeobox protein 2 (Lhx2), mRNA.	1.64806	15.1968
St8sia3	Mus musculus ST8 alpha-N-acetyl-neuraminide alpha-2,8-sialyltransferase 3 (St8sia3), mRNA.	1.64798	15.1968
Edil3	Mus musculus EGF-like repeats and discoidin I-like domains 3 (Edil3), transcript variant 1, mRNA.	1.62112	15.1968
Camta1	Mus musculus calmodulin binding transcription activator 1 (Camta1), transcript variant 1, mRNA.	1.61249	15.1968
Fam155a	Mus musculus family with sequence similarity 155, member A (Fam155a), mRNA.	1.60737	15.1968
Reep2	Mus musculus receptor accessory protein 2 (Reep2), mRNA.	1.60033	15.1968
Aldh1l2	Mus musculus aldehyde dehydrogenase 1 family, member L2 (Aldh1l2), nuclear gene encoding mitochondrial protein, mRNA.	1.59579	15.1968
Cacna1c	Mus musculus calcium channel, voltage-dependent, L type, alpha 1C subunit (Cacna1c), transcript variant 2, mRNA.	1.59071	15.1968
Trib2	Mus musculus tribbles homolog 2 (Drosophila) (Trib2), mRNA.	1.58142	15.1968
D830030K20Rik	Mus musculus RIKEN cDNA D830030K20 gene (D830030K20Rik), mRNA.	1.58009	15.1968
Kctd15	Mus musculus potassium channel tetramerisation domain containing 15 (Kctd15), mRNA.	1.57988	15.1968
Pcdhb12	Mus musculus protocadherin beta 12 (Pcdhb12), mRNA.	1.56219	15.1968
Nlgn3	Mus musculus neuroligin 3 (Nlgn3), mRNA.	1.55963	15.1968
Bcas1	Mus musculus breast carcinoma amplified sequence 1 (Bcas1), transcript variant 1, mRNA.	1.55878	15.1968
Mybl2	Mus musculus myeloblastosis oncogene-like 2 (Mybl2), mRNA.	1.55684	15.1968
Cenpk	Mus musculus centromere protein K (Cenpk), transcript variant 1, mRNA.	1.55242	15.1968
Zfp105	Mus musculus zinc finger protein 105 (Zfp105), mRNA.	1.55166	15.1968
D830030K20Rik	Mus musculus RIKEN cDNA D830030K20 gene (D830030K20Rik), mRNA.	1.54848	15.1968
Agpat4	Mus musculus 1-acylglycerol-3-phosphate O-acyltransferase 4 (lysophosphatidic acid acyltransferase, delta) (Agpat4), mRNA.	1.54506	15.1968
Asxl3	Mus musculus additional sex combs like 3 (Drosophila) (Asxl3), mRNA.	1.54497	15.1968
Pdxp	Mus musculus pyridoxal (pyridoxine, vitamin B6) phosphatase (Pdxp), mRNA.	1.53384	15.1968
Smc2	Mus musculus structural maintenance of chromosomes 2 (Smc2), mRNA.	1.52305	15.1968
Bard1	Mus musculus BRCA1 associated RING domain 1 (Bard1), mRNA.	1.5129	15.1968
Adcy2	Mus musculus adenylate cyclase 2 (Adcy2), mRNA.	1.50486	15.1968
Pcdha10	Mus musculus protocadherin alpha 10 (Pcdha10), mRNA.	1.49681	15.1968
Chrna5	Mus musculus cholinergic receptor, nicotinic, alpha polypeptide 5 (Chrna5), mRNA.	1.48962	15.1968
Pcdhb7	Mus musculus protocadherin beta 7 (Pcdhb7), mRNA.	1.48588	15.1968
Chd5	Mus musculus chromodomain helicase DNA binding protein 5 (Chd5), transcript variant 1, mRNA.	1.48138	15.1968
---	cdna:known chromosome:NCBIM37:12:19335163:19340516:1 gene:ENSMUSG00000073157	1.47054	15.1968
St3gal1	Mus musculus ST3 beta-galactoside alpha-2,3-sialyltransferase 1 (St3gal1), mRNA.	1.4685	15.1968
Clcn6	Mus musculus chloride channel 6 (Clcn6), mRNA.	1.46723	15.1968
Kif20b	Mus musculus kinesin family member 20B (Kif20b), mRNA.	1.46122	15.1968
Kif3c	Mus musculus kinesin family member 3C (Kif3c), mRNA.	1.45864	15.1968
Wasf1	Mus musculus WASP family 1 (Wasf1), mRNA.	1.45862	15.1968
Nutf2	Mus musculus nuclear transport factor 2 (Nutf2), mRNA.	1.45767	15.1968
Ggt7	Mus musculus gamma-glutamyltransferase 7 (Ggt7), mRNA.	1.45747	15.1968
Mpp3	Mus musculus membrane protein, palmitoylated 3 (MAGUK p55 subfamily member 3) (Mpp3), mRNA.	1.45671	15.1968
Ankrd1	Mus musculus ankyrin repeat domain 1 (cardiac muscle) (Ankrd1), mRNA.	1.45521	15.1968
Uncx	Mus musculus UNC homeobox (Uncx), mRNA.	1.45346	15.1968
Kif26b	Mus musculus kinesin family member 26B (Kif26b), mRNA.	1.44614	15.1968
D030056L22Rik	Mus musculus RIKEN cDNA D030056L22 gene, mRNA (cDNA clone MGC:28164 IMAGE:3985075), complete cds.	1.44591	15.1968
Kcna4	Mus musculus potassium voltage-gated channel, shaker-related subfamily, member 4 (Kcna4), mRNA.	1.43816	15.1968
Etv5	Mus musculus ets variant gene 5 (Etv5), mRNA.	1.43359	15.1968
Cxx1a	Mus musculus CAAX box 1 homolog A (human) (Cxx1a), mRNA.	1.43269	15.1968
Six4	Mus musculus sine oculis-related homeobox 4 homolog (Drosophila) (Six4), mRNA.	1.43172	15.1968
Cxx1a	Mus musculus CAAX box 1 homolog A (human) (Cxx1a), mRNA.	1.42312	15.1968
Arhgef7	Mus musculus Rho guanine nucleotide exchange factor (GEF7) (Arhgef7), transcript variant 2, mRNA.	1.40473	15.1968
Slc4a3	Mus musculus solute carrier family 4 (anion exchanger), member 3 (Slc4a3), mRNA.	1.40086	15.1968
Nefh	Mus musculus neurofilament, heavy polypeptide (Nefh), mRNA.	1.40068	15.1968
Klhl32	Mus musculus kelch-like 32 (Drosophila) (Klhl32), transcript variant 1, mRNA.	1.39598	15.1968
Slc24a2	Mus musculus solute carrier family 24 (sodium/potassium/calcium exchanger), member 2 (Slc24a2), transcript variant 1, mRNA.	1.39533	15.1968
Dhfr	Mus musculus dihydrofolate reductase (Dhfr), mRNA.	1.39464	15.1968
Gramd4	Mus musculus GRAM domain containing 4 (Gramd4), mRNA.	1.39329	15.1968
Ptpdc1	Mus musculus protein tyrosine phosphatase domain containing 1 (Ptpdc1), mRNA.	1.38867	15.1968
Pde10a	Mus musculus phosphodiesterase 10A (Pde10a), mRNA.	1.37623	15.1968
Map3k12	Mus musculus mitogen-activated protein kinase kinase kinase 12 (Map3k12), transcript variant 1, mRNA.	1.37558	15.1968
Hcfc1	Mus musculus host cell factor C1 (Hcfc1), mRNA.	1.37307	15.1968
Myoz1	Mus musculus myozenin 1 (Myoz1), mRNA.	1.37062	15.1968
Klhl22	Mus musculus kelch-like 22 (Drosophila) (Klhl22), mRNA.	1.36953	15.1968
Tmem229a	Mus musculus transmembrane protein 229A (Tmem229a), mRNA.	1.3683	15.1968
Tshz3	Mus musculus teashirt zinc finger family member 3 (Tshz3), mRNA.	1.36457	15.1968
Phf21b	Mus musculus PHD finger protein 21B (Phf21b), transcript variant 2, non-coding RNA.	1.35948	15.1968
2810026P18Rik	Mus musculus RIKEN cDNA 2810026P18 gene, mRNA (cDNA clone IMAGE:1224948), complete cds.	1.35558	15.1968
Ndrg1	Mus musculus N-myc downstream regulated gene 1 (Ndrg1), mRNA.	1.35464	15.1968
Jph4	Mus musculus junctophilin 4 (Jph4), transcript variant a, mRNA.	1.35399	15.1968
Dll4	Mus musculus delta-like 4 (Drosophila) (Dll4), mRNA.	1.35314	15.1968
Wdr54	Mus musculus WD repeat domain 54 (Wdr54), mRNA.	1.34634	15.1968
Gm5803	Mus musculus predicted gene 5803 (Gm5803), mRNA.	1.3444	15.1968
Hs3st4	Uncharacterized protein gene:ENSMUSG00000078591	1.34201	15.1968
Pard6a	Mus musculus par-6 (partitioning defective 6,) homolog alpha (C. elegans) (Pard6a), transcript variant 3, mRNA.	1.34013	15.1968
Zfp518b	Mus musculus zinc finger protein 518B (Zfp518b), transcript variant 1, mRNA.	1.33306	15.1968
Spef1	Mus musculus sperm flagellar 1 (Spef1), mRNA.	1.3326	15.1968
Arl8a	Mus musculus ADP-ribosylation factor-like 8A (Arl8a), mRNA.	1.33246	15.1968
Gm129	Mus musculus gene model 129, (NCBI), mRNA (cDNA clone MGC:164102 IMAGE:40130748), complete cds.	1.33113	15.1968
Dut	Mus musculus deoxyuridine triphosphatase (Dut), nuclear gene encoding mitochondrial protein, transcript variant 2, mRNA.	1.33095	15.1968
Agtpbp1	Mus musculus ATP/GTP binding protein 1 (Agtpbp1), transcript variant 1, mRNA.	1.33026	15.1968
Abca7	Mus musculus ATP-binding cassette, sub-family A (ABC1), member 7 (Abca7), mRNA.	1.32923	15.1968
Mapk8ip3	Mus musculus mitogen-activated protein kinase 8 interacting protein 3 (Mapk8ip3), transcript variant 1, mRNA.	1.32904	15.1968
Lmo1	Mus musculus LIM domain only 1 (Lmo1), mRNA.	1.3269	15.1968
Mtbp	Mus musculus Mdm2, transformed 3T3 cell double minute p53 binding protein (Mtbp), transcript variant 1, mRNA.	1.32346	15.1968
1700054N08Rik	Mus musculus RIKEN cDNA 1700054N08 gene, mRNA (cDNA clone MGC:25105 IMAGE:4501054), complete cds.	1.31913	15.1968
Magef1	Mus musculus adult male olfactory brain cDNA, RIKEN full-length enriched library, clone:6430590I03 product:hypothetical protein, full insert sequence.	1.31358	15.1968
Eid2	Mus musculus EP300 interacting inhibitor of differentiation 2 (Eid2), mRNA.	1.31141	15.1968
Sez6l	Mus musculus seizure related 6 homolog like (Sez6l), mRNA.	1.30932	15.1968
BC027344	Mus musculus cDNA sequence BC027344, mRNA (cDNA clone MGC:28065 IMAGE:3709361), complete cds.	1.30902	15.1968
Dlgap3	Mus musculus discs, large (Drosophila) homolog-associated protein 3 (Dlgap3), mRNA.	1.30839	15.1968
Wdhd1	Mus musculus WD repeat and HMG-box DNA binding protein 1 (Wdhd1), mRNA.	1.30744	15.1968
Hrasls	Mus musculus HRAS-like suppressor (Hrasls), mRNA.	1.30733	15.1968
Tanc2	Mus musculus tetratricopeptide repeat, ankyrin repeat and coiled-coil containing 2 (Tanc2), mRNA.	1.30588	15.1968
Rny1	Mus musculus RNA, Y1 small cytoplasmic, Ro-associated (Rny1), small cytoplasmic RNA.	1.30553	15.1968
Garnl3	Mus musculus GTPase activating RANGAP domain-like 3 (Garnl3), mRNA.	1.30483	15.1968
Lrrc4	Mus musculus leucine rich repeat containing 4 (Lrrc4), mRNA.	1.30456	15.1968
Cadm4	Mus musculus cell adhesion molecule 4 (Cadm4), mRNA.	1.30339	15.1968
P4htm	Mus musculus prolyl 4-hydroxylase, transmembrane (endoplasmic reticulum) (P4htm), mRNA.	1.30187	15.1968
Gnaz	Mus musculus guanine nucleotide binding protein, alpha z subunit (Gnaz), mRNA.	1.30155	15.1968
Plxna1	Mus musculus plexin A1 (Plxna1), mRNA.	1.30081	15.1968
Gm5784	Putative uncharacterized protein (Fragment) gene:ENSMUSG00000073187	1.29717	15.1968
---	cdna:Genscan chromosome:NCBIM37:12:18142992:18224060:1	1.29696	15.1968
Trim9	Mus musculus tripartite motif-containing 9 (Trim9), transcript variant 1, mRNA.	1.29591	15.1968
Vash1	Mus musculus vasohibin 1 (Vash1), mRNA.	1.295	15.1968
Mcm8	Mus musculus minichromosome maintenance deficient 8 (S. cerevisiae) (Mcm8), mRNA.	1.29088	15.1968
2810025M15Rik	Mus musculus RIKEN cDNA 2810025M15 gene, mRNA (cDNA clone MGC:67868 IMAGE:3585495), complete cds.	1.28883	15.1968
Zfp128	Mus musculus zinc finger protein 128 (Zfp128), mRNA.	1.28761	15.1968
Zfp239	Mus musculus zinc finger protein 239 (Zfp239), transcript variant 1, mRNA.	1.28712	15.1968
Me3	Mus musculus malic enzyme 3, NADP(+)-dependent, mitochondrial (Me3), nuclear gene encoding mitochondrial protein, mRNA.	1.2849	15.1968
Lysmd2	Mus musculus LysM, putative peptidoglycan-binding, domain containing 2 (Lysmd2), mRNA.	1.28418	15.1968
Gpr120	Mus musculus G protein-coupled receptor 120 (Gpr120), mRNA.	1.28149	15.1968
Ampd2	Mus musculus adenosine monophosphate deaminase 2 (Ampd2), mRNA.	1.28047	15.1968
Ptms	Mus musculus parathymosin (Ptms), mRNA.	1.2793	15.1968
Zcchc14	Mus musculus zinc finger, CCHC domain containing 14 (Zcchc14), mRNA.	1.27533	15.1968
Lingo2	Mus musculus leucine rich repeat and Ig domain containing 2 (Lingo2), transcript variant 1, mRNA.	1.27508	15.1968
BC066028	Mus musculus cDNA sequence BC066028 (BC066028), mRNA.	1.27498	15.1968
Thoc3	Mus musculus THO complex 3 (Thoc3), mRNA.	1.27171	15.1968
Ccna1	Mus musculus cyclin A1 (Ccna1), mRNA.	1.27155	15.1968
Cyr61	Mus musculus cysteine rich protein 61 (Cyr61), mRNA.	1.27014	15.1968
Gm6653	Mus musculus adult male testis cDNA, RIKEN full-length enriched library, clone:4930412E16 product:hypothetical protein, full insert sequence.	1.26995	15.1968
LOC100043371	Mus musculus RIKEN cDNA 6030426L16 gene, mRNA (cDNA clone MGC:117729 IMAGE:30937101), complete cds.	1.268	15.1968
Meaf6	Mus musculus MYST/Esa1-associated factor 6 (Meaf6), mRNA.	1.26461	15.1968
Neurl4	Mus musculus neuralized homolog 4 (Drosophila) (Neurl4), mRNA.	1.25933	15.1968
Camk2b	Mus musculus calcium/calmodulin-dependent protein kinase II, beta (Camk2b), transcript variant 2, mRNA.	1.25747	15.1968
Lin9	Mus musculus lin-9 homolog (C. elegans) (Lin9), transcript variant 1, mRNA.	1.25574	15.1968
Plk5	Mus musculus polo-like kinase 5 (Drosophila) (Plk5), mRNA.	1.25316	15.1968
Nphp4	Mus musculus nephronophthisis 4 (juvenile) homolog (human) (Nphp4), mRNA.	1.2514	15.1968
Tet3	Mus musculus tet oncogene family member 3 (Tet3), mRNA.	1.25072	15.1968
Agk	Mus musculus acylglycerol kinase (Agk), nuclear gene encoding mitochondrial protein, mRNA.	1.25046	15.1968
Atic	Mus musculus 5-aminoimidazole-4-carboxamide ribonucleotide formyltransferase/IMP cyclohydrolase (Atic), mRNA.	1.24957	15.1968
Uba2	Mus musculus ubiquitin-like modifier activating enzyme 2 (Uba2), mRNA.	1.24771	15.1968
Carhsp1	Mus musculus calcium regulated heat stable protein 1 (Carhsp1), mRNA.	1.24758	15.1968
Smarce1	Mus musculus SWI/SNF related, matrix associated, actin dependent regulator of chromatin, subfamily e, member 1 (Smarce1), mRNA.	1.24366	15.1968
Gstcd	Mus musculus glutathione S-transferase, C-terminal domain containing (Gstcd), mRNA.	1.24196	15.1968
Pttg1	Mus musculus pituitary tumor-transforming gene 1 (Pttg1), transcript variant 2, mRNA.	1.24162	15.1968
Snx25	Mus musculus sorting nexin 25 (Snx25), mRNA.	1.2378	15.1968
Tsga14	Mus musculus testis specific gene A14 (Tsga14), mRNA.	1.23723	15.1968
Aatk	Mus musculus apoptosis-associated tyrosine kinase (Aatk), mRNA.	1.23524	15.1968
Crat	Mus musculus carnitine acetyltransferase (Crat), nuclear gene encoding mitochondrial protein, mRNA.	1.23153	15.1968
Lgals7	Mus musculus lectin, galactose binding, soluble 7 (Lgals7), mRNA.	1.23042	15.1968
Nt5c3l	Mus musculus 5'-nucleotidase, cytosolic III-like (Nt5c3l), transcript variant 2, mRNA.	1.22905	15.1968
Il4ra	Mus musculus interleukin 4 receptor, alpha (Il4ra), mRNA.	1.22813	15.1968
Snrnp35	Mus musculus small nuclear ribonucleoprotein 35 (U11/U12) (Snrnp35), mRNA.	1.22684	15.1968
Carhsp1	Mus musculus calcium regulated heat stable protein 1 (Carhsp1), mRNA.	1.22641	15.1968
Cdk5r2	Mus musculus cyclin-dependent kinase 5, regulatory subunit 2 (p39) (Cdk5r2), mRNA.	1.2243	15.1968
Flot2	Mus musculus flotillin 2 (Flot2), transcript variant 2, mRNA.	1.22404	15.1968
Bag5	Mus musculus BCL2-associated athanogene 5 (Bag5), mRNA.	1.2227	15.1968
Lrrc56	Mus musculus leucine rich repeat containing 56 (Lrrc56), transcript variant 1, mRNA.	1.22202	15.1968
Apold1	Mus musculus apolipoprotein L domain containing 1 (Apold1), mRNA.	1.22169	15.1968
Zbtb5	Mus musculus zinc finger and BTB domain containing 5 (Zbtb5), transcript variant 1, mRNA.	1.22129	15.1968
---	cdna:pseudogene chromosome:NCBIM37:X:89132640:89134904:-1 gene:ENSMUSG00000083994	1.21961	15.1968
---	cdna:known chromosome:NCBIM37:12:18687388:18690061:1 gene:ENSMUSG00000073194	1.21675	15.1968
Samd4b	Mus musculus sterile alpha motif domain containing 4B (Samd4b), mRNA.	1.21665	15.1968
Bcl2l13	Mus musculus BCL2-like 13 (apoptosis facilitator) (Bcl2l13), nuclear gene encoding mitochondrial protein, mRNA.	1.21351	15.1968
Zbtb45	Mus musculus zinc finger and BTB domain containing 45 (Zbtb45), mRNA.	1.21218	15.1968
Timm17a	Mus musculus translocase of inner mitochondrial membrane 17a (Timm17a), nuclear gene encoding mitochondrial protein, mRNA.	1.21147	15.1968
Ryk	Mus musculus receptor-like tyrosine kinase (Ryk), transcript variant 1, mRNA.	1.20912	15.1968
Rsph10b2	Putative uncharacterized protein (Fragment) gene:ENSMUSG00000075569	1.20828	15.1968
L3mbtl	Mus musculus l(3)mbt-like (Drosophila) (L3mbtl), mRNA.	1.2055	15.1968
Commd1	Mus musculus COMM domain containing 1 (Commd1), mRNA.	1.20458	15.1968
---	gi|34538597|ref|NC_005089.1|:2676-2750, tRNA-Leu	1.20426	15.1968
Topbp1	Mus musculus topoisomerase (DNA) II binding protein 1 (Topbp1), mRNA.	1.20178	15.1968
Ogfr	Mus musculus opioid growth factor receptor (Ogfr), mRNA.	1.20065	15.1968
1700086D15Rik	Putative uncharacterized protein gene:ENSMUSG00000020548	1.20035	15.1968
4930524L23Rik	Mus musculus RIKEN cDNA 4930524L23 gene (4930524L23Rik), non-coding RNA.	1.19939	15.1968
Gm9979	Putative uncharacterized protein gene:ENSMUSG00000055732	1.19933	15.1968
Usp39	Mus musculus ubiquitin specific peptidase 39 (Usp39), mRNA.	1.19902	15.1968
Slc25a23	Mus musculus solute carrier family 25 (mitochondrial carrier; phosphate carrier), member 23 (Slc25a23), nuclear gene encoding mitochondrial protein, mRNA.	1.19873	15.1968
Zfp358	Mus musculus zinc finger protein 358 (Zfp358), mRNA.	1.19789	15.1968
Mars	Mus musculus methionine-tRNA synthetase (Mars), transcript variant 1, mRNA.	1.19703	15.1968
Ppp1r14a	Mus musculus protein phosphatase 1, regulatory (inhibitor) subunit 14A (Ppp1r14a), mRNA.	1.19639	15.1968
Atf5	Mus musculus activating transcription factor 5 (Atf5), transcript variant 1, mRNA.	1.19618	15.1968
Eefsec	Mus musculus eukaryotic elongation factor, selenocysteine-tRNA-specific (Eefsec), mRNA.	1.19394	15.1968
Mcart6	Mus musculus mitochondrial carrier triple repeat 6 (Mcart6), nuclear gene encoding mitochondrial protein, transcript variant 1, mRNA.	1.19317	15.1968
Cct3	Mus musculus chaperonin containing Tcp1, subunit 3 (gamma) (Cct3), mRNA.	1.1931	15.1968
Taf6	Mus musculus TAF6 RNA polymerase II, TATA box binding protein (TBP)-associated factor (Taf6), mRNA.	1.18968	15.1968
Capn9	Mus musculus calpain 9 (Capn9), mRNA.	1.18736	15.1968
Frat2	Mus musculus frequently rearranged in advanced T-cell lymphomas 2 (Frat2), mRNA.	1.18588	15.1968
Pcdh8	Mus musculus protocadherin 8 (Pcdh8), transcript variant 1, mRNA.	1.18365	15.1968
Ptov1	Mus musculus prostate tumor over expressed gene 1 (Ptov1), mRNA.	1.183	15.1968
Snora21	Mus musculus small nucleolar RNA, H/ACA box 21 (Snora21), small nucleolar RNA.	1.18221	15.1968
Ttll12	Mus musculus tubulin tyrosine ligase-like family, member 12 (Ttll12), mRNA.	1.18202	15.1968
Trim8	tripartite motif-containing protein 8 gene:ENSMUSG00000025034	1.18009	15.1968
Gm12070	Mus musculus predicted gene 12070 (Gm12070), non-coding RNA.	1.1781	15.1968
Snord38a	Mus musculus small nucleolar RNA, C/D box 38A (Snord38a), small nucleolar RNA.	1.17758	15.1968
Acvr2b	Mus musculus activin receptor IIB (Acvr2b), mRNA.	1.17671	15.1968
Calm1	Mus musculus calmodulin 1 (Calm1), mRNA.	1.17405	15.1968
[truncated: 7,196 more rows]
